# Supplementary material for: Improved uranium particle analysis by SIMS using O3− primary ions
Source: Royal Society of Chemistry journal article supplement (doi:10.1039/d2ja00231k), 2022-01-01
Supplement: d2ja00231k1.xlsx [file d2ja00231k1.xlsx]

## Sheet: Figure 1
IRMM 2329P on C	Panels A, C								Inkjet on Si	Panels C, D
Time	Count Rate	Count Rate	Count Rate	Cumulative Sum	Cumulative Sum	Cumulative Sum			Time	Count Rate	Count Rate	Count Rate	Cumulative Sum	Cumulative Sum	Cumulative Sum
Time	O	O2	O3	O	O2	O3			Time	O	O2	O3	O	O2	O3
2.24	267250	170317	229667	267250	170317	229667			2.4	194376	169705	175596	194376	169705	175596
4.32	267500	169999	209000	534750	340316	438667			4.48	192226	171329	190918	386602	341034	366514
6.4	263500	169478	196667	798250	509794	635334			6.64	186108	172560	202854	572710	513594	569368
8.48	257250	169516	183333	1055500	679310	818667			8.8	175550	173814	208505	748260	687408	777873
10.6	252250	170135	175333	1307750	849445	994000			10.96	167600	176142	213030	915860	863550	990903
12.7	249500	167979	186000	1557250	1017424	1180000			13.12	161899	177184	216529	1077759	1040734	1207432
14.8	248000	163141	201000	1805250	1180565	1381000			15.2	158676	180365	220666	1236435	1221099	1428098
17	248500	163517	216667	2053750	1344082	1597667			17.28	156688	183337	224957	1393123	1404436	1653055
19	251250	169908	230667	2305000	1513990	1828334			19.36	155257	186351	229387	1548380	1590787	1882442
21.1	255750	177774	244667	2560750	1691764	2073001			21.44	154808	189568	233492	1703188	1780355	2115934
23.3	256750	185359	258333	2817500	1877123	2331334			23.6	154673	193153	237947	1857861	1973508	2353881
25.4	256250	192533	271000	3073750	2069656	2602334			25.69	155126	195991	243766	2012987	2169499	2597647
27.6	257750	199145	284333	3331500	2268801	2886667			27.77	155833	199501	249087	2168820	2369000	2846734
29.8	259750	205879	296000	3591250	2474680	3182667			29.851	156948	202966	255024	2325768	2571966	3101758
31.8	262000	212104	308667	3853250	2686784	3491334			31.931	158245	205816	261482	2484013	2777782	3363240
34	262500	218205	320667	4115750	2904989	3812001			34.091	158889	208251	268212	2642902	2986033	3631452
36.1	263500	224293	331333	4379250	3129282	4143334			36.171	160978	210747	275591	2803880	3196780	3907043
38.3	264500	230233	343333	4643750	3359515	4486667			38.251	162498	212915	281521	2966378	3409695	4188564
40.4	264750	236110	355333	4908500	3595625	4842000			40.335	164382	214701	290642	3130760	3624396	4479206
42.6	266500	241377	368333	5175000	3837002	5210333			42.497	166658	216591	297632	3297418	3840987	4776838
44.7	268000	246308	379667	5443000	4083310	5590000			44.657	168369	218821	305199	3465787	4059808	5082037
46.9	270250	251566	390667	5713250	4334876	5980667			46.817	171119	220696	313601	3636906	4280504	5395638
49	273000	256386	402000	5986250	4591262	6382667			48.977	173992	222238	320142	3810898	4502742	5715780
51.1	275250	261176	412667	6261500	4852438	6795334			51.138	175382	224621	326654	3986280	4727363	6042434
53.2	277750	265812	423667	6539250	5118250	7219001			53.299	177303	227512	331072	4163583	4954875	6373506
55.3	280500	270591	434333	6819750	5388841	7653334			55.459	179201	230319	335589	4342784	5185194	6709095
57.5	284000	275096	445333	7103750	5663937	8098667			57.583	181859	233625	339468	4524643	5418819	7048563
59.6	286500	279404	455333	7390250	5943341	8554000			59.664	183430	236427	343137	4708073	5655246	7391700
61.8	289500	283824	465333	7679750	6227165	9019333			61.837	186032	240888	344834	4894105	5896134	7736534
63.9	292250	288138	475667	7972000	6515303	9495000			63.919	188536	245287	346550	5082641	6141421	8083084
66.1	294750	292478	484333	8266750	6807781	9979333			65.999	190442	249790	347212	5273083	6391211	8430296
68.3	296750	296031	493667	8563500	7103812	10473000			68.159	192181	253437	349798	5465264	6644648	8780094
70.4	299250	300049	503000	8862750	7403861	10976000			70.239	193869	258775	350425	5659133	6903423	9130519
72.6	301500	303734	512333	9164250	7707595	11488333			72.319	196059	262453	351839	5855192	7165876	9482358
74.7	304250	307397	521333	9468500	8014992	12009666			74.399	197940	266314	353402	6053132	7432190	9835760
76.9	306750	311032	530333	9775250	8326024	12539999			76.56	200166	268788	353979	6253298	7700978	10189739
79	309500	314197	540000	10084750	8640221	13079999			78.64	201963	271519	355523	6455261	7972497	10545262
81.2	311750	317637	548000	10396500	8957858	13627999			80.72	203390	273756	355826	6658651	8246253	10901088
83.4	314000	321161	556333	10710500	9279019	14184332			82.88	203725	274915	355944	6862376	8521168	11257032
85.4	316250	324157	564000	11026750	9603176	14748332			84.96	205644	275031	355922	7068020	8796199	11612954
87.5	319250	327387	572000	11346000	9930563	15320332			87.04	207054	275101	356192	7275074	9071300	11969146
89.6	321750	330478	580667	11667750	10261041	15900999			89.12	208845	273911	355651	7483919	9345211	12324797
91.8	323250	332782	588333	11991000	10593823	16489332			91.2	210007	271986	355118	7693926	9617197	12679915
93.8	326250	335925	595000	12317250	10929748	17084332			93.28	211952	269041	355692	7905878	9886238	13035607
95.9	328750	338856	602000	12646000	11268604	17686332			95.36	214398	267033	355057	8120276	10153271	13390664
98	330250	341678	609333	12976250	11610282	18295665			97.44	216838	265358	353503	8337114	10418629	13744167
100	333000	344742	615667	13309250	11955024	18911332			99.52	219088	262790	353550	8556202	10681419	14097717
102	335250	346915	622000	13644500	12301939	19533332			101.6	221179	261173	353778	8777381	10942592	14451495
104	337750	349577	629000	13982250	12651516	20162332			103.68	223259	259502	352244	9000640	11202094	14803739
106	339750	352131	635333	14322000	13003647	20797665			105.76	225792	258233	351096	9226432	11460327	15154835
109	342000	354841	641667	14664000	13358488	21439332			107.84	228654	256716	349844	9455086	11717043	15504679
111	344000	356851	648000	15008000	13715339	22087332			110	231160	255328	349948	9686246	11972371	15854627
113	345750	359179	653333	15353750	14074518	22740665			112.08	234380	254893	348140	9920626	12227264	16202767
115	348250	361312	659333	15702000	14435830	23399998			114.24	236584	253289	347244	10157210	12480553	16550011
117	350000	363673	664667	16052000	14799503	24064665			116.4	239206	252063	346735	10396416	12732616	16896746
119	352250	365275	668000	16404250	15164778	24732665			118.48	242509	250409	346401	10638925	12983025	17243147
121	353500	367135	672333	16757750	15531913	25404998			120.56	245886	250109	345684	10884811	13233134	17588831
123	355250	369645	678667	17113000	15901558	26083665			122.64	252793	248881	345059	11137604	13482015	17933890
126	356500	370919	682667	17469500	16272477	26766332			124.8	261673	247889	343318	11399277	13729904	18277208
128	357750	373472	688000	17827250	16645949	27454332			126.96	259813	247152	341653	11659090	13977056	18618861
130	359500	375360	693333	18186750	17021309	28147665			129.05	245943	245374	339972	11905033	14222430	18958833
132	361000	376824	697333	18547750	17398133	28844998			131.13	233644	244375	339010	12138677	14466805	19297843
134	362500	378194	700667	18910250	17776327	29545665			133.21	224753	243626	338256	12363430	14710431	19636099
136	363750	379986	704667	19274000	18156313	30250332			135.29	218322	242552	337460	12581752	14952983	19973559
138	364500	381333	707000	19638500	18537646	30957332			137.37	213708	241272	336385	12795460	15194255	20309944
140	365750	383693	711333	20004250	18921339	31668665			139.45	209570	240355	334683	13005030	15434610	20644627
142	367250	384432	713667	20371500	19305771	32382332			141.53	206546	239865	332385	13211576	15674475	20977012
145	368000	385464	716333	20739500	19691235	33098665			143.69	204185	238629	331960	13415761	15913104	21308972
147	369250	387616	718333	21108750	20078851	33816998			145.85	201855	237456	329967	13617616	16150560	21638939
149	370750	388619	720667	21479500	20467470	34537665			148.01	201434	236865	329073	13819050	16387425	21968012
151	371500	389521	723000	21851000	20856991	35260665			150.09	199524	235408	326905	14018574	16622833	22294917
153	372750	391009	724333	22223750	21248000	35984998			152.17	197563	234781	325542	14216137	16857614	22620459
155	373000	392131	726667	22596750	21640131	36711665			154.25	196492	233838	324510	14412629	17091452	22944969
157	373500	392762	728000	22970250	22032893	37439665			156.41	195202	233353	322526	14607831	17324805	23267495
160	374500	394373	729333	23344750	22427266	38168998			158.57	193733	232001	320816	14801564	17556806	23588311
162	375500	395106	732667	23720250	22822372	38901665			160.73	192456	230893	318523	14994020	17787699	23906834
164	375500	396423	735000	24095750	23218795	39636665			162.81	191828	229571	317309	15185848	18017270	24224143
166	377250	396804	737667	24473000	23615599	40374332			164.89	190927	229146	314272	15376775	18246416	24538415
168	377250	397996	738667	24850250	24013595	41112999			166.97	189687	227872	314076	15566462	18474288	24852491
170	377750	399033	741333	25228000	24412628	41854332			169.05	188540	226292	312187	15755002	18700580	25164678
173	379250	399600	740667	25607250	24812228	42594999			171.13	188018	225787	310692	15943020	18926367	25475370
175	379250	400591	741000	25986500	25212819	43335999			173.29	186791	224522	309500	16129811	19150889	25784870
177	380000	400526	743333	26366500	25613345	44079332			175.49	185258	224412	307774	16315069	19375301	26092644
179	379750	401644	742667	26746250	26014989	44821999			177.61	184740	223190	305366	16499809	19598491	26398010
181	380500	401638	743667	27126750	26416627	45565666			179.78	183749	221621	303727	16683558	19820112	26701737
183	380750	402025	744667	27507500	26818652	46310333			181.94	182297	221374	301990	16865855	20041486	27003727
185	381000	403157	746333	27888500	27221809	47056666			184.06	181770	220492	301562	17047625	20261978	27305289
188	381000	403753	746333	28269500	27625562	47802999			186.15	181384	219296	299432	17229009	20481274	27604721
190	381500	403576	746667	28651000	28029138	48549666			188.24	180033	218266	297632	17409042	20699540	27902353
192	381750	403882	746667	29032750	28433020	49296333			190.32	179445	217033	296386	17588487	20916573	28198739
194	381000	404233	747000	29413750	28837253	50043333			192.4	178853	216449	294268	17767340	21133022	28493007
196	381250	404633	746000	29795000	29241886	50789333			194.48	178229	215062	293038	17945569	21348084	28786045
198	381750	404376	745000	30176750	29646262	51534333			196.56	177179	214700	291910	18122748	21562784	29077955
200	381500	404351	745000	30558250	30050613	52279333			198.64	177345	212708	290929	18300093	21775492	29368884
202	381250	404422	744667	30939500	30455035	53024000			200.72	176033	212622	288664	18476126	21988114	29657548
204	381000	404088	743333	31320500	30859123	53767333			202.88	175985	211787	287842	18652111	22199901	29945390
206	381250	404291	743333	31701750	31263414	54510666			205.04	175047	209994	286656	18827158	22409895	30232046
208	380750	404095	741333	32082500	31667509	55251999			207.2	174703	209748	285202	19001861	22619643	30517248
211	380750	403296	740667	32463250	32070805	55992666			209.28	174011	209173	283444	19175872	22828816	30800692
213	380250	403730	738667	32843500	32474535	56731333			211.44	173415	208087	281626	19349287	23036903	31082318
215	380500	403190	737667	33224000	32877725	57469000			213.52	173389	207000	279448	19522676	23243903	31361766
217	380250	402443	735667	33604250	33280168	58204667			215.61	171926	206710	277580	19694602	23450613	31639346
219	379750	402170	732667	33984000	33682338	58937334			217.69	171208	205687	276003	19865810	23656300	31915349
221	378750	401888	732667	34362750	34084226	59670001			219.77	170774	205957	275319	20036584	23862257	32190668
224	378750	401810	730667	34741500	34486036	60400668			221.85	170486	204509	273146	20207070	24066766	32463814
226	378500	400466	729333	35120000	34886502	61130001			223.93	170414	203286	272062	20377484	24270052	32735876
228	378000	400479	727333	35498000	35286981	61857334			226.01	169433	201994	271366	20546917	24472046	33007242
230	378000	399557	726667	35876000	35686538	62584001			228.09	169184	201232	270659	20716101	24673278	33277901
232	377750	399257	725000	36253750	36085795	63309001			230.17	168844	199368	268992	20884945	24872646	33546893
234	377000	398575	723333	36630750	36484370	64032334			232.34	168177	198908	268161	21053122	25071554	33815054
236	376250	397838	720333	37007000	36882208	64752667			234.5	168058	198060	266467	21221180	25269614	34081521
239	375750	396823	717000	37382750	37279031	65469667			236.74	168433	197064	265503	21389613	25466678	34347024
241	375000	396227	715667	37757750	37675258	66185334			238.9	167371	195588	263836	21556984	25662266	34610860
243	374000	395592	713667	38131750	38070850	66899001			241.02	167038	195024	262481	21724022	25857290	34873341
245	373250	395143	711667	38505000	38465993	67610668			243.1	166276	194579	261576	21890298	26051869	35134917
247	372500	392407	709667	38877500	38858400	68320335			245.26	166495	193256	259665	22056793	26245125	35394582
249	372000	390676	707333	39249500	39249076	69027668			247.34	166287	192296	259160	22223080	26437421	35653742
251	371250	391818	706333	39620750	39640894	69734001			249.43	165560	191628	257625	22388640	26629049	35911367
253	370250	391023	703000	39991000	40031917	70437001			251.51	165136	190545	256871	22553776	26819594	36168238
255	370250	390587	701000	40361250	40422504	71138001			253.59	164692	189992	254683	22718468	27009586	36422921
257	369500	389547	698667	40730750	40812051	71836668			255.67	164696	188833	254071	22883164	27198419	36676992
259	369000	388331	695667	41099750	41200382	72532335			257.75	164292	188477	252922	23047456	27386896	36929914
262	368250	387388	693000	41468000	41587770	73225335			259.91	163985	187299	251532	23211441	27574195	37181446
264	367000	386211	689667	41835000	41973981	73915002			261.99	162581	186462	249902	23374022	27760657	37431348
266	366500	385361	688333	42201500	42359342	74603335			264.15	162972	185523	248094	23536994	27946180	37679442
268	365500	384103	684000	42567000	42743445	75287335			266.23	161422	184701	247198	23698416	28130881	37926640
270	365000	383093	680333	42932000	43126538	75967668			268.31	161302	183957	245664	23859718	28314838	38172304
272	364000	382189	677667	43296000	43508727	76645335			270.39	160651	182952	244472	24020369	28497790	38416776
274	362750	381195	674333	43658750	43889922	77319668			272.47	160918	181891	243666	24181287	28679681	38660442
276	361250	379913	670333	44020000	44269835	77990001			274.55	160481	180386	242840	24341768	28860067	38903282
278	361000	379169	666333	44381000	44649004	78656334			276.64	159558	180114	241171	24501326	29040181	39144453
281	359500	377581	663667	44740500	45026585	79320001			278.72	158922	178339	240456	24660248	29218520	39384909
283	358750	376246	661333	45099250	45402831	79981334			280.88	158919	178001	238248	24819167	29396521	39623157
285	357500	374966	657667	45456750	45777797	80639001			282.96	158576	176800	236156	24977743	29573321	39859313
287	356500	373433	654667	45813250	46151230	81293668			285.14	158430	175415	235225	25136173	29748736	40094538
289	355250	372306	651333	46168500	46523536	81945001			287.3	158233	174685	233442	25294406	29923421	40327980
291	354750	371279	648333	46523250	46894815	82593334			289.46	158110	173448	233729	25452516	30096869	40561709
293	353500	369706	645000	46876750	47264521	83238334			291.62	157216	172359	230892	25609732	30269228	40792601
296	353000	368550	641667	47229750	47633071	83880001			293.78	157217	171934	229656	25766949	30441162	41022257
298	351250	367495	637667	47581000	48000566	84517668			295.94	157388	171115	228730	25924337	30612277	41250987
300	350000	365928	634000	47931000	48366494	85151668			298.06	156705	170024	227553	26081042	30782301	41478540
302	349250	364790	629667	48280250	48731284	85781335			300.18	156513	169586	226356	26237555	30951887	41704896
304	347750	363085	627333	48628000	49094369	86408668			302.34	156043	167993	225340	26393598	31119880	41930236
306	346750	361561	623333	48974750	49455930	87032001			304.5	155824	167398	224737	26549422	31287278	42154973
308	345000	359689	620333	49319750	49815619	87652334			306.66	155393	166781	223503	26704815	31454059	42378476
310	344250	358650	616000	49664000	50174269	88268334			308.78	155067	165298	221792	26859882	31619357	42600268
312	342750	356921	612667	50006750	50531190	88881001			310.94	154780	164581	221059	27014662	31783938	42821327
314	341250	355574	610000	50348000	50886764	89491001			313.03	154165	163697	219688	27168827	31947635	43041015
317	340250	353977	605667	50688250	51240741	90096668			315.19	153219	163289	218684	27322046	32110924	43259699
319	338750	352686	601667	51027000	51593427	90698335			317.36	153311	161671	216652	27475357	32272595	43476351
321	337500	350777	599667	51364500	51944204	91298002			319.44	152878	161544	215042	27628235	32434139	43691393
323	336250	349103	595000	51700750	52293307	91893002			321.52	152069	160173	214476	27780304	32594312	43905869
325	335000	347821	592000	52035750	52641128	92485002			323.6	151261	159855	212833	27931565	32754167	44118702
327	333500	345676	588667	52369250	52986804	93073669			325.76	150780	158375	211218	28082345	32912542	44329920
329	332500	344451	585000	52701750	53331255	93658669			327.84	150584	157445	210274	28232929	33069987	44540194
331	330750	342778	580333	53032500	53674033	94239002			329.93	150185	156801	209153	28383114	33226788	44749347
334	329750	340854	577000	53362250	54014887	94816002			332.01	149624	155490	207746	28532738	33382278	44957093
336	328500	339616	573000	53690750	54354503	95389002			334.09	149507	155084	205857	28682245	33537362	45162950
338	327000	338011	570333	54017750	54692514	95959335			336.14	148888	154365	204688	28831133	33691727	45367638
340	325750	336071	567000	54343500	55028585	96526335			338.22	148589	153878	203513	28979722	33845605	45571151
342	324500	334973	562667	54668000	55363558	97089002			340.38	147382	152101	201891	29127104	33997706	45773042
344	323250	333098	558333	54991250	55696656	97647335			342.46	146844	151947	200848	29273948	34149653	45973890
346	321500	331171	554000	55312750	56027827	98201335			344.66	146985	150890	199353	29420933	34300543	46173243
348	320750	329590	551000	55633500	56357417	98752335			346.79	145932	150115	197832	29566865	34450658	46371075
350	319750	327976	547000	55953250	56685393	99299335			348.89	145342	149354	196921	29712207	34600012	46567996
352	318000	326467	543000	56271250	57011860	99842335			351.05	144838	148379	195086	29857045	34748391	46763082
355	317250	325063	537667	56588500	57336923	100380002			353.13	143972	147503	193728	30001017	34895894	46956810
357	316250	322961	534667	56904750	57659884	100914669			355.29	143421	147012	192650	30144438	35042906	47149460
359	314750	321456	531000	57219500	57981340	101445669			357.37	143034	146417	190826	30287472	35189323	47340286
361	313750	320034	527667	57533250	58301374	101973336			359.45	142295	144857	190450	30429767	35334180	47530736
363	312250	318160	523333	57845500	58619534	102496669			361.5	142615	144488	189895	30572382	35478668	47720631
365	310750	315826	519000	58156250	58935360	103015669			363.66	141212	143430	188766	30713594	35622098	47909397
367	309750	314653	516000	58466000	59250013	103531669			365.74	140874	142047	187625	30854468	35764145	48097022
369	308250	312421	511667	58774250	59562434	104043336			367.9	140188	141072	187310	30994656	35905217	48284332
371	306500	310802	508667	59080750	59873236	104552003			369.98	139845	140836	186425	31134501	36046053	48470757
374	305750	309102	505000	59386500	60182338	105057003			372.06	139201	139706	186087	31273702	36185759	48656844
376	304250	307198	501000	59690750	60489536	105558003			374.14	138862	139032	184641	31412564	36324791	48841485
378	302750	306140	496000	59993500	60795676	106054003			376.22	137905	137908	183846	31550469	36462699	49025331
380	301000	304295	492667	60294500	61099971	106546670			378.3	137924	137280	182644	31688393	36599979	49207975
382	300250	302437	488667	60594750	61402408	107035337			380.38	137862	136733	182134	31826255	36736712	49390109
384	298750	300310	485000	60893500	61702718	107520337			382.46	136243	135373	180870	31962498	36872085	49570979
386	296750	298553	481333	61190250	62001271	108001670			384.54	136320	134890	179968	32098818	37006975	49750947
388	295500	297145	478333	61485750	62298416	108480003			386.62	134575	133293	178697	32233393	37140268	49929644
390	294250	295170	473667	61780000	62593586	108953670			388.7	134417	132949	178066	32367810	37273217	50107710
393	292250	293485	470667	62072250	62887071	109424337			390.78	134120	132319	177935	32501930	37405536	50285645
395	291000	291785	467667	62363250	63178856	109892004			392.87	133226	131124	176747	32635156	37536660	50462392
397	289750	289970	464333	62653000	63468826	110356337			394.95	132616	130126	175901	32767772	37666786	50638293
399	288250	288353	461000	62941250	63757179	110817337			397.03	132513	129220	174804	32900285	37796006	50813097
401	286500	286095	457667	63227750	64043274	111275004			399.19	131022	128707	174747	33031307	37924713	50987844
403	285250	284543	455333	63513000	64327817	111730337			401.36	130213	128370	173856	33161520	38053083	51161700
406	283500	282558	451333	63796500	64610375	112181670			403.44	130342	127135	172522	33291862	38180218	51334222
408	282500	280356	447667	64079000	64890731	112629337			405.6	129362	127202	171236	33421224	38307420	51505458
410	280750	279278	444333	64359750	65170009	113073670			407.68	128472	125804	170232	33549696	38433224	51675690
412	278750	277365	441000	64638500	65447374	113514670			409.84	128054	125453	169182	33677750	38558677	51844872
414	278000	275053	438000	64916500	65722427	113952670			412.04	128364	125017	167812	33806114	38683694	52012684
416	276250	273170	434667	65192750	65995597	114387337			414.16	127934	123989	167303	33934048	38807683	52179987
418	274750	271313	431000	65467500	66266910	114818337			416.24	127274	123664	165985	34061322	38931347	52345972
420	273500	269457	426667	65741000	66536367	115245004			418.4	127229	122382	164789	34188551	39053729	52510761
422	272250	268109	424000	66013250	66804476	115669004			420.49	126959	121983	163370	34315510	39175712	52674131
424	270500	266447	420667	66283750	67070923	116089671			422.57	126457	121046	161944	34441967	39296758	52836075
426	269250	263629	418000	66553000	67334552	116507671			424.65	125784	120671	160826	34567751	39417429	52996901
428	267750	261287	414333	66820750	67595839	116922004			426.73	125158	119533	160084	34692909	39536962	53156985
431	266250	259535	411333	67087000	67855374	117333337			428.81	124405	118805	159036	34817314	39655767	53316021
433	264750	257785	407667	67351750	68113159	117741004			430.97	123690	118249	158521	34941004	39774016	53474542
435	263250	256282	404000	67615000	68369441	118145004			433.05	123234	116765	157579	35064238	39890781	53632121
437	261500	253887	401333	67876500	68623328	118546337			435.13	122784	116098	157753	35187022	40006879	53789874
439	260250	251997	398333	68136750	68875325	118944670			437.21	122262	115828	157133	35309284	40122707	53947007
441	258750	250571	396000	68395500	69125896	119340670			439.29	121821	114830	155339	35431105	40237537	54102346
443	257250	248316	392000	68652750	69374212	119732670			441.37	121832	114298	154175	35552937	40351835	54256521
445	255250	246344	389333	68908000	69620556	120122003			443.45	120951	113453	153778	35673888	40465288	54410299
447	254000	245076	385667	69162000	69865632	120507670			445.61	121066	112663	152436	35794954	40577951	54562735
450	252250	242828	382333	69414250	70108460	120890003			447.77	120241	111808	150836	35915195	40689759	54713571
452	250250	241744	378667	69664500	70350204	121268670			449.93	119608	110694	150331	36034803	40800453	54863902
454	249250	239706	375000	69913750	70589910	121643670			452.09	119376	109495	149990	36154179	40909948	55013892
456	247500	237973	371333	70161250	70827883	122015003			454.25	118945	108222	148342	36273124	41018170	55162234
458	245750	236230	367667	70407000	71064113	122382670			456.41	118104	107700	147498	36391228	41125870	55309732
460	244000	234296	363667	70651000	71298409	122746337			458.54	118206	107033	146482	36509434	41232903	55456214
463	242750	232585	360333	70893750	71530994	123106670			460.62	116833	105916	144843	36626267	41338819	55601057
465	241000	230668	357333	71134750	71761662	123464003			462.7	117073	105192	144026	36743340	41444011	55745083
467	239500	228735	354667	71374250	71990397	123818670			464.78	115886	104407	142384	36859226	41548418	55887467
469	237750	227275	351333	71612000	72217672	124170003			466.94	115216	103499	141105	36974442	41651917	56028572
471	235750	225848	348667	71847750	72443520	124518670			469.1	115042	102829	140028	37089484	41754746	56168600
473	233750	223961	346000	72081500	72667481	124864670			471.26	113494	102225	139016	37202978	41856971	56307616
475	232750	222356	343000	72314250	72889837	125207670			473.34	113233	101839	138144	37316211	41958810	56445760
477	231750	220447	339667	72546000	73110284	125547337			475.5	112432	100741	137180	37428643	42059551	56582940
479	229500	218839	336333	72775500	73329123	125883670			477.66	111494	99906.7	136496	37540137	4.21595e+07	56719436
481	227750	217313	334333	73003250	73546436	126218003			479.86	111022	98991.8	135426	37651159	4.22584e+07	56854862
484	226500	215694	330667	73229750	73762130	126548670			481.98	110465	98399.6	134742	37761624	4.23568e+07	56989604
486	224750	214359	328000	73454500	73976489	126876670			484.14	109689	97426.3	134070	37871313	4.24543e+07	57123674
488	222750	212531	324667	73677250	74189020	127201337			486.22	109186	96399.9	133112	37980499	4.25507e+07	57256786
490	221500	211014	321333	73898750	74400034	127522670			488.3	107985	96473.3	132562	38088484	4.26471e+07	57389348
492	219750	209234	317333	74118500	74609268	127840003			490.4	107599	95454.4	131740	38196083	4.27426e+07	57521088
494	218000	207748	315000	74336500	74817016	128155003			492.48	107255	94981.4	130889	38303338	4.28376e+07	57651977
496	217000	205867	311667	74553500	75022883	128466670			494.56	106214	94103.9	129939	38409552	4.29317e+07	57781916
498	215250	205003	309000	74768750	75227886	128775670			496.65	105682	93213.8	129226	38515234	4.30249e+07	57911142
500	213750	202919	307000	74982500	75430805	129082670			498.73	104959	92779.1	128572	38620193	4.31177e+07	58039714
502	211750	201276	304000	75194250	75632081	129386670			500.81	104176	91845.4	127531	38724369	4.32095e+07	58167245
504	210500	200097	301333	75404750	75832178	129688003			502.97	103384	91481.6	126613	38827753	4.3301e+07	58293858
507	208750	198782	298333	75613500	76030960	129986336			505.05	102834	91067.5	124954	38930587	4.33921e+07	58418812
509	207500	196990	295667	75821000	76227950	130282003			507.13	102234	89952	124204	39032821	4.3482e+07	58543016
511	206000	195818	292667	76027000	76423768	130574670			509.26	101640	89530.4	123550	39134461	4.35716e+07	58666566
513	204000	193660	290333	76231000	76617428	130865003			511.34	101285	88881.7	122448	39235746	4.36604e+07	58789014
515	202250	192927	287333	76433250	76810355	131152336			513.5	100624	88263.7	121269	39336370	4.37487e+07	58910283
517	201000	191748	285667	76634250	77002103	131438003			515.66	100288	87865.8	120298	39436658	4.38366e+07	59030581
519	199250	189814	283000	76833500	77191917	131721003			517.82	100042	86696.7	118827	39536700	4.39233e+07	59149408
521	197500	188801	280000	77031000	77380718	132001003			519.9	99443.2	86076.8	118402	3.96361e+07	4.40093e+07	59267810
523	196000	187284	277000	77227000	77568002	132278003			522.1	98682.6	85551.3	117252	3.97348e+07	4.40949e+07	59385062
525	194250	186108	275333	77421250	77754110	132553336			524.23	98555.9	85283.6	115900	3.98334e+07	4.41802e+07	59500962
528	192750	184673	273333	77614000	77938783	132826669			526.38	97225.8	84412.5	115257	3.99306e+07	4.42646e+07	59616219
530	191000	183021	270667	77805000	78121804	133097336			528.53	96781.9	83706.2	114289	4.00274e+07	4.43483e+07	59730508
532	189500	181370	266667	77994500	78303174	133364003			530.62	96342.1	83343.6	112740	4.01237e+07	4.44316e+07	59843248
534	188000	180272	264667	78182500	78483446	133628670			532.7	95526.8	82112.5	111805	4.02193e+07	4.45138e+07	59955053
536	186500	178639	263667	78369000	78662085	133892337			534.86	95231.8	81949.8	110342	4.03145e+07	4.45957e+07	60065395
538	185000	177195	260667	78554000	78839280	134153004			536.94	94765.3	81446.5	109482	4.04093e+07	4.46771e+07	60174877
540	183250	176025	259000	78737250	79015305	134412004			539.02	94409.5	80285.4	108032	4.05037e+07	4.47574e+07	60282909
542	182000	174460	256333	78919250	79189765	134668337			541.1	93414.4	79631.5	106737	4.05971e+07	4.48371e+07	60389646
545	179750	172581	253667	79099000	79362346	134922004			543.18	93120.9	78843.6	105470	4.06902e+07	4.49159e+07	60495116
547	179000	171403	251333	79278000	79533749	135173337			545.26	92260	77936.7	104920	4.07825e+07	4.49938e+07	60600036
549	177250	170100	249667	79455250	79703849	135423004			547.34	91697.6	76961	103653	4.08742e+07	4.50708e+07	60703689
551	175750	168765	247667	79631000	79872614	135670671			549.43	90691.6	76577.4	102613	4.09648e+07	4.51474e+07	60806302
553	174250	167765	245333	79805250	80040379	135916004			551.51	90551.4	75816.8	101220	4.10554e+07	4.52232e+07	60907522
555	172500	166034	244000	79977750	80206413	136160004			553.59	89936.9	74938.6	100117	4.11453e+07	4.52981e+07	61007639
557	171000	164430	241333	80148750	80370843	136401337			555.67	89221.9	74196.6	99144.6	4.12346e+07	4.53723e+07	6.11068e+07
560	169250	163220	239333	80318000	80534063	136640670			557.75	88807.4	73488.7	98606.7	4.13234e+07	4.54458e+07	6.12054e+07
562	168250	161901	236667	80486250	80695964	136877337			559.91	88137.1	72469.1	97920.5	4.14115e+07	4.55183e+07	6.13033e+07
564	166500	160455	234333	80652750	80856419	137111670			561.99	87248.3	71678	97385.1	4.14988e+07	4.559e+07	6.14007e+07
566	165750	159070	232667	80818500	81015489	137344337			564.07	86794.2	70802.1	96602.4	4.15855e+07	4.56608e+07	6.14973e+07
568	163750	157861	231000	80982250	81173350	137575337			566.15	86782.6	70519	95796.7	4.16723e+07	4.57313e+07	6.15931e+07
570	162750	156429	229333	81145000	81329779	137804670			568.23	86334	69640.1	95358.4	4.17587e+07	4.58009e+07	6.16885e+07
572	160750	155193	227000	81305750	81484972	138031670			570.31	85658.8	68947.5	93947.6	4.18443e+07	4.58699e+07	6.17824e+07
574	159500	153499	224000	81465250	81638471	138255670			572.39	85227.8	68395.9	93604.3	4.19295e+07	4.59383e+07	6.1876e+07
576	157750	152322	223000	81623000	81790793	138478670			574.47	84688.3	67740.5	92839.4	4.20142e+07	4.6006e+07	6.19688e+07
578	156500	150683	220333	81779500	81941476	138699003			576.55	84434.1	66709.7	92335.9	4.20987e+07	46072727	6.20612e+07
581	155000	149535	218333	81934500	82091011	138917336			578.63	83723.8	66015.6	91493.1	4.21824e+07	4.61387e+07	6.21527e+07
583	153750	148134	216333	82088250	82239145	139133669			580.79	83207.5	65389.9	91116.2	4.22656e+07	4.62041e+07	6.22438e+07
585	152750	146695	215000	82241000	82385840	139348669			582.87	82876.4	64766.7	90267.5	4.23485e+07	4.62689e+07	6.23341e+07
587	151250	145412	213667	82392250	82531252	139562336			584.96	82182.3	64356.7	89334.4	4.24307e+07	4.63333e+07	6.24234e+07
589	150000	144480	212000	82542250	82675732	139774336			587.04	81847.8	63660.2	88844	4.25125e+07	4.63969e+07	6.25122e+07
591	148750	142901	210000	82691000	82818633	139984336			589.12	81019.1	63043.1	88296.4	4.25935e+07	4.646e+07	6.26005e+07
593	147000	141550	208667	82838000	82960183	140193003			591.2	81151.2	62332.2	88167.2	4.26747e+07	4.65223e+07	6.26887e+07
595	145500	140648	206333	82983500	83100831	140399336			593.36	80466.2	61519.9	87798	4.27551e+07	4.65838e+07	6.27765e+07
597	145250	139227	205000	83128750	83240058	140604336			595.56	79799.2	61276.6	87182.5	4.28349e+07	4.66451e+07	6.28637e+07
599	143750	138203	202667	83272500	83378261	140807003			597.68	79215.2	60578.2	86727.9	4.29142e+07	4.67057e+07	6.29504e+07
602	142250	137198	201333	83414750	83515459	141008336			599.76	79434.6	59655.2	86095.9	4.29936e+07	4.67653e+07	6.30365e+07
604	141000	135859	199000	83555750	83651318	141207336			601.92	78516.7	59438	85275	4.30721e+07	4.68248e+07	6.31218e+07
606	140000	134759	198000	83695750	83786077	141405336			604	77875.4	58831	84527	4.315e+07	4.68836e+07	6.32063e+07
608	138750	133617	196333	83834500	83919694	141601669			606.08	77029.8	58215.6	84016.2	4.3227e+07	4.69418e+07	6.32903e+07
610	137250	132441	195000	83971750	84052135	141796669			608.16	76443.9	57795.2	83458.1	4.33035e+07	4.69996e+07	6.33738e+07
612	136000	131259	193000	84107750	84183394	141989669			610.24	75328.7	57129.1	83264.7	4.33788e+07	4.70567e+07	6.3457e+07
614	134500	129962	191667	84242250	84313356	142181336			612.32	74639.9	56838.2	82194.9	4.34534e+07	4.71136e+07	6.35392e+07
617	133500	129021	189667	84375750	84442377	142371003			614.4	74032.9	55888.8	81693.1	4.35275e+07	4.71695e+07	6.36209e+07
619	132250	127802	188000	84508000	84570179	142559003			616.48	73875.8	55575.8	81044.7	4.36013e+07	4.7225e+07	6.3702e+07
621	131250	126365	187000	84639250	84696544	142746003			618.56	73299.5	54704.2	81120.6	4.36746e+07	4.72797e+07	6.37831e+07
623	130250	125507	185333	84769500	84822051	142931336			620.64	72797.4	54595.3	80530.4	4.37474e+07	4.73343e+07	6.38636e+07
625	129000	124448	184000	84898500	84946499	143115336			622.8	72579.1	53645	79664.6	4.382e+07	4.7388e+07	6.39433e+07
627	127750	123398	182333	85026250	85069897	143297669			624.88	72031.4	53070.8	79051.5	4.3892e+07	4.7441e+07	6.40223e+07
630	127250	122309	181333	85153500	85192206	143479002			627.05	71487.3	52942	78656.3	4.39635e+07	4.7494e+07	6.4101e+07
632	125500	121235	179667	85279000	85313441	143658669			629.21	70762.4	52186.3	77534	4.40343e+07	4.75462e+07	6.41785e+07
634	124500	119792	178667	85403500	85433233	143837336			631.37	69949.8	51769.1	77294.4	4.41042e+07	4.75979e+07	6.42558e+07
636	123750	119000	176667	85527250	85552233	144014003			633.53	69407.7	51362.9	76398.2	4.41737e+07	4.76493e+07	6.43322e+07
638	122500	117990	175333	85649750	85670223	144189336			635.69	68576.1	51146.3	75974.4	4.42422e+07	4.77005e+07	6.44082e+07
640	121500	116679	173667	85771250	85786902	144363003			637.85	67938.7	50444.9	75323.7	4.43102e+07	4.77509e+07	6.44835e+07
642	120250	115784	172333	85891500	85902686	144535336			640.01	67473.5	50058.3	73681	4.43776e+07	4.7801e+07	6.45572e+07
644	119250	114776	171000	86010750	86017462	144706336			642.13	67320.9	49635.2	72782.4	4.4445e+07	4.78506e+07	6.463e+07
646	118375	113677	169000	86129125	86131139	144875336			644.21	67128.7	49096.7	71938	4.45121e+07	4.78997e+07	6.47019e+07
648	117225	112816	168333	86246350	86243955	145043669			646.29	66743.3	48573.8	71228.8	4.45788e+07	4.79483e+07	6.47732e+07
651	116125	111604	167000	86362475	86355559	145210669			648.37	65737.6	48456	70552.6	4.46446e+07	4.79967e+07	6.48437e+07
653	115075	110553	165667	86477550	86466112	145376336			650.53	65725.1	47756.6	69502.1	4.47103e+07	4.80445e+07	6.49132e+07
655	114625	109656	164000	86592175	86575768	145540336			652.74	65563	47413.7	68424	4.47759e+07	4.80919e+07	6.49816e+07
657	113200	108882	163667	86705375	86684650	145704003			654.86	65167.6	47038.8	67883	4.4841e+07	4.81389e+07	6.50495e+07
659	112025	107758	162333	86817400	86792408	145866336			657.02	64562.4	46413.2	66783.9	4.49056e+07	4.81853e+07	6.51163e+07
661	111425	106819	161000	86928825	86899227	146027336			659.18	64383.3	46486.3	66026.7	4.497e+07	4.82318e+07	6.51823e+07
663	110450	105598	159667	87039275	87004825	146187003			661.26	64413.4	45765.5	65600.6	4.50344e+07	4.82776e+07	6.52479e+07
665	109475	104608	158333	87148750	87109433	146345336			663.34	64060.7	45141	64468.1	4.50984e+07	4.83227e+07	6.53124e+07
667	108625	103982	157000	87257375	87213415	146502336			665.42	63898.6	45181.6	63703.9	4.51623e+07	4.83679e+07	6.53761e+07
669	107975	103014	155333	87365350	87316429	146657669			667.5	63139.9	44855.3	63012.5	4.52255e+07	4.84128e+07	6.54391e+07
671	107175	101932	154333	87472525	87418361	146812002			669.58	63153.5	44166.6	62223.3	4.52886e+07	4.84569e+07	6.55013e+07
674	106100	101410	153000	87578625	87519771	146965002			671.67	62974.9	43961.1	61360.4	4.53516e+07	4.85009e+07	6.55627e+07
676	105050	100083	152667	87683675	87619854	147117669			673.83	62760.1	43441.8	60357	4.54144e+07	4.85443e+07	6.56231e+07
678	104200	99226.6	151667	87787875	8.77191e+07	147269336			675.92	62606.6	43144.1	59487.7	4.5477e+07	4.85875e+07	6.56825e+07
680	103325	98485	150333	87891200	8.78176e+07	147419669			678	62635.7	42832.4	58592.3	4.55396e+07	4.86303e+07	6.57411e+07
682	102800	97808.1	149000	87994000	8.79154e+07	147568669			680.08	62592.6	42056.6	58046	4.56022e+07	4.86724e+07	6.57992e+07
684	101900	96839.5	148000	88095900	8.80122e+07	147716669			682.16	62634.7	41694.8	57014.8	4.56648e+07	4.87141e+07	6.58562e+07
686	101050	95736.4	147000	88196950	8.81079e+07	147863669			684.32	62314.1	41053.8	56319.1	4.57272e+07	4.87551e+07	6.59125e+07
689	100200	94992.6	145667	88297150	8.82029e+07	148009336			686.48	62345.2	40659.9	54861.6	4.57895e+07	4.87958e+07	6.59674e+07
691	99475	94480.2	145000	88396625	8.82974e+07	148154336			688.56	61793.3	40344.7	54111.4	4.58513e+07	4.88361e+07	6.60215e+07
693	98800	93517	143333	88495425	8.83909e+07	148297669			690.64	61452.7	39855.1	53447.9	4.59127e+07	4.8876e+07	6.60749e+07
695	98100	92427.7	142667	88593525	8.84834e+07	148440336			692.72	61581.1	39593.6	51938.1	4.59743e+07	4.89156e+07	6.61269e+07
697	97225	91784.3	141667	88690750	8.85752e+07	148582003			694.88	61361.9	39092	51120.3	4.60357e+07	4.89547e+07	6.6178e+07
699	96350	90835.9	141000	88787100	8.8666e+07	148723003			696.96	60586.3	38760.8	50233.8	4.60963e+07	4.89934e+07	6.62282e+07
701	95700	90157.8	140000	88882800	8.87561e+07	148863003			699.04	60775.4	38237.7	49145.8	4.61571e+07	4.90317e+07	6.62774e+07
703	94975	89232.1	138667	88977775	8.88454e+07	149001670			701.12	60454.8	37927	48455	4.62175e+07	4.90696e+07	6.63258e+07
705	94125	88513.8	137333	89071900	8.89339e+07	149139003			703.2	60201	37736.1	47203.2	4.62777e+07	4.91073e+07	6.6373e+07
708	93400	87874.3	136667	89165300	8.90218e+07	149275670			705.28	60138.8	37272.2	46507.9	4.63378e+07	4.91446e+07	6.64195e+07
710	92825	86957	135667	89258125	8.91087e+07	149411337			707.36	60339.5	37092.8	45714.4	4.63982e+07	4.91817e+07	6.64653e+07
712	92200	86311.5	135000	89350325	8.9195e+07	149546337			709.45	60073.6	36323.8	44485.9	4.64583e+07	4.9218e+07	66509739
714	91525	85558.5	134000	89441850	8.92806e+07	149680337			711.61	59587	36120.3	43526.5	4.65178e+07	4.92541e+07	6.65533e+07
716	90750	84914	133333	89532600	8.93655e+07	149813670			713.77	59226.8	35939	42705.1	4.65771e+07	4.92901e+07	6.6596e+07
718	90050	83910.2	132000	89622650	8.94494e+07	149945670			715.93	58813.5	35330.3	41767.9	4.66359e+07	4.93254e+07	6.66377e+07
720	89650	83370.7	131000	89712300	8.95328e+07	150076670			718.09	58392.1	35075.3	40741.6	4.66943e+07	4.93605e+07	6.66785e+07
722	88775	82684.4	130000	89801075	8.96155e+07	150206670			720.25	58127.8	34830.3	39692.3	4.67524e+07	4.93953e+07	6.67182e+07
724	88175	82032.1	128667	89889250	8.96975e+07	150335337			722.41	57573	34795.8	39007.3	4.681e+07	4.94301e+07	6.67572e+07
726	87300	81203.9	128333	89976550	8.97787e+07	150463670			724.57	57080.5	34411	38177.5	4.68671e+07	4.94645e+07	6.67954e+07
729	86750	80564.7	127333	90063300	8.98593e+07	150591003			726.73	56996.7	34052.9	37218.6	4.69241e+07	4.94986e+07	6.68326e+07
731	86275	79765.1	126333	90149575	8.9939e+07	150717336			728.86	56611	33549.9	36376.3	4.69807e+07	4.95321e+07	6.6869e+07
733	85875	78896.1	125000	90235450	9.00179e+07	150842336			730.95	56204.7	33422.2	35557.2	4.70369e+07	4.95655e+07	6.69045e+07
735	85000	78427.4	124333	90320450	9.00964e+07	150966669			733.03	55749.8	33138.2	34838.3	4.70926e+07	4.95987e+07	6.69393e+07
737	84400	77713.2	123333	90404850	9.01741e+07	151090002			735.19	55634.5	32888.2	34078.4	4.71483e+07	4.96316e+07	6.69734e+07
739	83750	77140.9	122333	90488600	90251215	151212335			737.27	55529.2	32335.7	33072.6	4.72038e+07	4.96639e+07	6.70065e+07
741	83075	76457.2	122000	90571675	9.03277e+07	151334335			739.43	55312.5	32123.3	32456.4	4.72591e+07	4.9696e+07	6.7039e+07
743	82400	75591.6	120667	90654075	9.04033e+07	151455002			741.59	54807.5	31458.7	31636.5	4.73139e+07	4.97275e+07	6.70706e+07
746	82025	75224.8	120333	90736100	9.04785e+07	151575335			743.67	54559.2	31017.4	30961.8	4.73685e+07	4.97585e+07	6.71016e+07
748	81375	74394.5	119333	90817475	9.05529e+07	151694668			745.75	54568.8	30947.3	30151.5	4.7423e+07	4.97895e+07	6.71317e+07
750	80850	73884.8	118333	90898325	9.06268e+07	151813001			747.91	54057.2	30283.7	29552.5	4.74771e+07	4.98197e+07	6.71613e+07
752	79850	73360.3	118000	90978175	9.07001e+07	151931001			750.07	53916.8	29732.3	28698.6	4.7531e+07	4.98495e+07	6.719e+07
754	79325	72563.3	117000	91057500	9.07727e+07	152048001			752.15	53454	29273	28354.6	4.75845e+07	4.98787e+07	6.72183e+07
756	78650	71980.9	116333	91136150	9.08447e+07	152164334			754.31	52994.1	29118.3	27423.7	4.76375e+07	4.99079e+07	6.72457e+07
758	78225	71377	115333	91214375	9.0916e+07	152279667			756.39	52767	28275	26804.7	4.76902e+07	4.99361e+07	6.72725e+07
760	77725	70706	114667	91292100	9.09868e+07	152394334			758.47	52359.3	27856.3	26114.2	4.77426e+07	4.9964e+07	6.72987e+07
762	77200	70026.2	114000	91369300	9.10568e+07	152508334			760.63	51932.1	27508.3	25289.6	4.77945e+07	4.99915e+07	6.73239e+07
765	76700	69554.8	113000	91446000	9.11263e+07	152621334			762.79	51863.4	27008.5	24710.8	4.78464e+07	5.00185e+07	6.73487e+07
767	76300	69000.3	112333	91522300	9.11953e+07	152733667			764.96	51403.1	26376.6	24189.6	4.78978e+07	5.00449e+07	6.73728e+07
769	75525	68387.9	111667	91597825	9.12637e+07	152845334			767.12	50810.9	25891.9	23644.9	4.79486e+07	5.00708e+07	6.73965e+07
771	75075	67912.6	111000	91672900	9.13316e+07	152956334			769.2	50525.1	25593.5	22730.2	4.79991e+07	5.00964e+07	6.74192e+07
773	74625	67298.4	110000	91747525	9.13989e+07	153066334			771.28	50064.8	25143.9	22376.8	4.80492e+07	5.01215e+07	6.74416e+07
775	74025	66753.9	109333	91821550	9.14657e+07	153175667			773.36	49648.7	24426.9	21522.2	4.80988e+07	5.01459e+07	6.74631e+07
777	73475	66315.2	108667	91895025	9.1532e+07	153284334			775.44	49330.8	24279.2	21067.7	4.81482e+07	5.01702e+07	6.74842e+07
780	73100	65645.6	107667	91968125	9.15977e+07	153392001			777.52	48622.4	23762	20609.7	4.81968e+07	5.0194e+07	6.75048e+07
782	72350	65149.3	106667	92040475	9.16628e+07	153498668			779.6	48445.5	23367	20190.2	4.82452e+07	5.02174e+07	6.7525e+07
784	72025	64622.9	106000	92112500	9.17274e+07	153604668			781.68	47908.5	22907.4	19731.7	4.82931e+07	5.02403e+07	6.75447e+07
786	71500	64072.8	105667	92184000	9.17915e+07	153710335			783.76	47587.2	22421.3	18971.4	4.83407e+07	5.02627e+07	6.75637e+07
788	70950	63621.4	104700	92254950	9.18551e+07	153815035			785.92	47324	22215.6	18316.2	4.83881e+07	5.02849e+07	6.7582e+07
790	70900	63092.6	103800	92325850	9.19182e+07	153918835			788.09	47295.4	21669.9	17952.4	4.84353e+07	5.03066e+07	6.76e+07
793	70200	62524.4	103533	92396050	9.19807e+07	154022368			790.25	46533	21219.9	17432.3	4.84819e+07	5.03278e+07	6.76174e+07
795	69625	62173.1	102967	92465675	9.20429e+07	154125335			792.41	46557.5	20934	16962.9	4.85284e+07	5.03487e+07	6.76344e+07
797	69300	61500.6	102000	92534975	9.21044e+07	154227335			794.57	45765.5	20377.4	16264.8	4.85742e+07	5.03691e+07	6.76506e+07
799	68825	60986.9	101600	92603800	9.21654e+07	154328935			796.69	45363	19909.4	15959	4.86196e+07	5.0389e+07	6.76666e+07
801	68275	60826	100567	92672075	9.22262e+07	154429502			798.77	45343	19785.3	15240.4	4.86649e+07	5.04088e+07	6.76818e+07
803	67825	60328.7	100533	92739900	92286549	154530035			800.85	44917.9	19254.2	14795.5	4.87098e+07	5.0428e+07	6.76966e+07
806	67475	59737.8	99633.3	92807375	9.23463e+07	1.5463e+08			802.93	44445.8	19058	14386.7	4.87543e+07	5.04471e+07	6.7711e+07
808	66750	59265.2	98833.3	92874125	92405552	1.54729e+08			805.1	44452.3	18718.1	13727.7	4.87987e+07	5.04658e+07	6.77247e+07
810	66500	58733	98166.7	92940625	92464285	1.54827e+08			807.17	44138.5	18163.6	13193.3	4.88429e+07	5.0484e+07	6.77379e+07
812	66075	58344.2	97366.7	93006700	9.25226e+07	154924035			809.26	43738.6	17788.2	12795.5	4.88866e+07	5.05018e+07	6.77507e+07
814	65450	58010.8	96933.3	93072150	92580640	1.55021e+08			811.34	43545.6	17129.6	12320.7	4.89301e+07	5.05189e+07	6.7763e+07
816	65150	57459.4	96133.3	93137300	9.26381e+07	1.55117e+08			813.42	43046.4	17088	11772.3	4.89732e+07	5.0536e+07	6.77748e+07
818	64650	57082.7	95833.3	93201950	9.26952e+07	1.55213e+08			815.51	43031.4	16480.5	11399.6	4.90162e+07	5.05525e+07	6.77862e+07
820	64275	56493.9	95100	93266225	9.27517e+07	1.55308e+08			817.59	42680.5	16370.9	10874.8	4.90589e+07	5.05688e+07	67797082
822	63950	56176.2	94366.7	93330175	9.28079e+07	1.55402e+08			819.75	42341.2	16015	10625.1	4.91012e+07	5.05849e+07	6.78077e+07
824	63425	55720	94000	93393600	9.28636e+07	1.55496e+08			821.95	41846.1	15702.3	9967.23	4.91431e+07	5.06006e+07	6.78177e+07
826	63225	55330.7	93366.7	93456825	9.29189e+07	1.5559e+08			824.07	40990.7	15257.9	9784.13	4.91841e+07	5.06158e+07	6.78275e+07
829	62600	54857.1	92466.7	93519425	9.29738e+07	155682235			826.23	40924.5	14824.5	9333.4	4.9225e+07	5.06306e+07	6.78368e+07
831	62150	54590.1	92000	93581575	9.30284e+07	155774235			828.31	40224.4	14722	9005.73	4.92652e+07	5.06454e+07	6.78458e+07
833	61925	54089.6	91300	93643500	9.30824e+07	155865535			830.47	40025.5	14144.5	8514.49	4.93053e+07	5.06595e+07	6.78543e+07
835	61600	53927	90666.7	93705100	9.31364e+07	1.55956e+08			832.56	39392.6	13905.8	8272.88	4.93447e+07	5.06734e+07	6.78626e+07
837	61250	53363.6	90266.7	93766350	9.31897e+07	1.56046e+08			834.64	39549.5	13753.2	7949.24	4.93842e+07	5.06872e+07	6.78705e+07
839	60750	52888.3	90066.7	93827100	9.32426e+07	1.56137e+08			836.8	39023.3	13169.3	7547.07	4.94232e+07	5.07003e+07	6.78781e+07
841	60275	52530.9	89266.7	93887375	9.32951e+07	1.56226e+08			838.93	38530.8	13061.2	7256.45	4.94618e+07	5.07134e+07	6.78853e+07
843	59875	52077.9	88666.7	93947250	9.33472e+07	1.56314e+08			841.01	38242.2	12559.3	6803.77	4.95e+07	5.0726e+07	6.78921e+07
845	59450	51735.3	88166.7	94006700	9.3399e+07	1.56403e+08			843.1	37730.1	12496.8	6643.71	4.95377e+07	5.07385e+07	6.78988e+07
848	59150	51320.8	87400	94065850	9.34503e+07	1.5649e+08			845.18	37410.9	12166.6	6317.6	4.95751e+07	5.07506e+07	6.79051e+07
850	58825	50975	87133.3	94124675	9.35013e+07	1.56577e+08			847.26	37197.5			4.96123e+07
852	58450	50631.8	86500	94183125	9.35519e+07	1.56664e+08			849.34	36596.3			4.96489e+07
854	58125	50256.8	86200	94241250	9.36021e+07	1.5675e+08			851.42	36286.2			4.96852e+07
856	57750	50049.2	85466.7	94299000	9.36522e+07	1.56835e+08			853.5	35799.2			4.9721e+07
858	57325	49632.2	85000	94356325	9.37018e+07	1.5692e+08			855.59	35089.3			4.97561e+07
860	57150	49396.9	84500	94413475	9.37512e+07	1.57005e+08			857.75	34605.4			4.97907e+07
862	56600	48732.7	83533.3	94470075	9.38e+07	1.57088e+08			859.91	34149.5			4.98249e+07
864	56300	48465.6	83300	94526375	9.38484e+07	1.57172e+08			861.99	34094.9			4.9859e+07
867	55875	48317.4	82933.3	94582250	9.38967e+07	1.57255e+08			864.07	33790.4			4.98927e+07
869	55500	47898.6	82300	94637750	9.39446e+07	1.57337e+08			866.15	33537.9			4.99263e+07
871	55175	47437.4	81933.3	94692925	9.39921e+07	1.57419e+08			868.24	33010.4			4.99593e+07
873	54775	47147.5	81400	94747700	9.40392e+07	1.575e+08			870.32	32565.6			4.99919e+07
875	54600	46765	80800	94802300	9.4086e+07	1.57581e+08			872.4	32065.2			5.00239e+07
877	54025	46445	80300	94856325	9.41324e+07	1.57661e+08			874.48	31718.6			5.00556e+07
879	53775	46191.4	79966.7	94910100	9.41786e+07	1.57741e+08			876.56	31470.2			5.00871e+07
881	53550	45725	79200	94963650	9.42244e+07	1.57821e+08			878.64	30953.3			5.01181e+07
883	53200	45411.8	79066.7	95016850	9.42698e+07	1.579e+08			880.8	30581.2			5.01486e+07
886	52925	45224.5	78400	95069775	9.4315e+07	1.57978e+08			882.88	30045.3			5.01787e+07
888	52675	44770.5	77866.7	95122450	9.43598e+07	1.58056e+08			884.96	29816.4			5.02085e+07
890	52350	44510.9	77366.7	95174800	9.44043e+07	1.58133e+08			887.12	29109.3			5.02376e+07
892	52100	44187.7	77100	95226900	9.44485e+07	1.5821e+08			889.28	28903.5			5.02665e+07
894	51750	43903.7	76433.3	95278650	9.44924e+07	1.58287e+08			891.41	28278.5			5.02948e+07
896	51300	43607.3	76033.3	95329950	9.4536e+07	1.58363e+08			893.57	27955.5			5.03228e+07
898	51100	43344.5	75766.7	95381050	9.45793e+07	1.58439e+08			895.65	27576.4			5.03503e+07
900	50625	43053.7	75200	95431675	9.46224e+07	1.58514e+08			897.73	27199.8			5.03775e+07
902	50425	42780.4	74600	95482100	9.46651e+07	1.58588e+08			899.93	26705.1			5.04042e+07
904	50250	42465.6	74233.3	95532350	9.47076e+07	1.58663e+08			902.05	26247.4			5.04305e+07
907	49700	42132.9	73866.7	95582050	9.47497e+07	1.58736e+08			904.21	25694.1			5.04562e+07
909	49675	41864.6	73266.7	95631725	9.47916e+07	1.5881e+08			906.37	25303.1			5.04815e+07
911	49375	41697.7	73166.7	95681100	9.48333e+07	1.58883e+08			908.53	25129.8			5.05066e+07
913	48950	41200.2	72366.7	95730050	9.48745e+07	1.58955e+08			910.62	24432.4			5.0531e+07
915	48700	40990.2	71800	95778750	9.49155e+07	1.59027e+08			912.78	24018.8			5.05551e+07
917	48475	40770.9	71533.3	95827225	9.49563e+07	1.59099e+08			914.86	23777			5.05788e+07
919	48075	40361.2	71266.7	95875300	9.49966e+07	1.5917e+08			917.02	23545.7			5.06024e+07
921	47900	40286.2	70566.7	95923200	9.50369e+07	1.5924e+08			919.1	23079.6			5.06255e+07
923	47575	39785.9	70366.7	95970775	9.50767e+07	1.59311e+08			921.28	22670.1			5.06481e+07
926	47375	39691.2	69733.3	96018150	9.51164e+07	1.59381e+08			923.36	22381.8			5.06705e+07
928	47150	39279	69500	96065300	9.51557e+07	1.5945e+08			925.44	22137			5.06927e+07
930	46775	39137.4	69100	96112075	9.51948e+07	1.59519e+08			927.52	21732			5.07144e+07
932	46625	38765.6	68666.7	96158700	9.52336e+07	1.59588e+08			929.68	21246.9			5.07356e+07
934	46350	38689.9	68466.7	96205050	9.52723e+07	1.59656e+08			931.84	20953.6			5.07566e+07
936	46150	38382.2	67766.7	96251200	9.53106e+07	1.59724e+08			933.92	20445.5			5.0777e+07
938	45800	38188	67300	96297000	9.53488e+07	1.59791e+08			936	20097.1			5.07971e+07
940	45675	37842.1	66966.7	96342675	9.53867e+07	1.59858e+08			938.16	20129.1			5.08173e+07
942	45375	37575.5	66566.7	96388050	9.54243e+07	1.59925e+08			940.32	19800.3			5.08371e+07
945	45075	37134.1	66266.7	96433125	9.54614e+07	1.59991e+08			942.49	19289.7			5.08563e+07
947	44825	36997.2	65700	96477950	9.54984e+07	1.60057e+08			944.65	18961.9			5.08753e+07
949	44675	36848.4	65300	96522625	9.55352e+07	1.60122e+08			946.77	18649.1			5.0894e+07
951	44300	36493	64933.3	96566925	9.55717e+07	1.60187e+08			948.89	18241.7			5.09122e+07
953	44100	36345.9	64666.7	96611025	9.56081e+07	1.60252e+08			951.05	17964.9			5.09302e+07
955	43875	35979.7	64333.3	96654900	9.56441e+07	1.60316e+08			953.17	17803.7			5.0948e+07
957	43725	35648.5	63566.7	96698625	9.56797e+07	1.6038e+08			955.25	17158.1			5.09651e+07
959	43575	35597.4	63500	96742200	9.57153e+07	1.60443e+08			957.33	16912.4			5.0982e+07
961	43100	35315	63066.7	96785300	9.57506e+07	1.60506e+08			959.41	16839.8			5.09989e+07
963	43100	35095.6	62500	96828400	9.57857e+07	1.60569e+08			961.49	16486			5.10154e+07
965	42900	35042.2	62500	96871300	9.58207e+07	1.60631e+08			963.57	16194.2			5.10316e+07
967	42600	34610.3	61933.3	96913900	9.58554e+07	1.60693e+08			965.65	15946			5.10475e+07
970	42425	34454.4	61633.3	96956325	9.58898e+07	1.60755e+08			967.81	15599.7			5.10631e+07
972	42275	34100.5	61100	96998600	9.59239e+07	1.60816e+08			969.89	15356.5			5.10785e+07
974	42125	34015.2	60800	97040725	9.59579e+07	1.60877e+08			971.97	15009.2			5.10935e+07
976	41825	33751.9	60366.7	97082550	9.59917e+07	1.60937e+08			974.05	14631.9			5.11081e+07
978	41550	33569.5	60133.3	97124100	9.60253e+07	1.60997e+08			976.21	14302.1			5.11224e+07
980	41400	33287.4	59933.3	97165500	9.60585e+07	1.61057e+08			978.3	13967.4			5.11364e+07
982	41175	33189.2	59666.7	97206675	9.60917e+07	1.61117e+08			980.38	13699.2			5.11501e+07
984	40950	32984.6	59333.3	97247625	9.61247e+07	1.61176e+08			982.46	13480			5.11636e+07
986	40800	32735.7	59000	97288425	9.61574e+07	1.61235e+08			984.54	13501			5.11771e+07
989	40600	32487.4	58433.3	97329025	9.61899e+07	1.61294e+08			986.62	13328.4			5.11904e+07
991	40200	32302.6	58200	97369225	9.62222e+07	1.61352e+08			988.7	12955.1			5.12033e+07
993	40050	32105.6	57700	97409275	9.62543e+07	1.61409e+08			990.78	12708.9			5.1216e+07
995	39925	31767.5	57400	97449200	9.62861e+07	1.61467e+08			992.86	12619.4			5.12287e+07
997	39725	31621.4	57033.3	97488925	9.63177e+07	1.61524e+08			994.96	12544.3			5.12412e+07
999	39400	31425.4	57100	97528325	9.63492e+07	1.61581e+08			997.04	12169.6			5.12534e+07
1000	39350	31174.6	56533.3	97567675	9.63803e+07	1.61637e+08			999.12	11999			5.12654e+07
1000	39300	31041.7	56200	97606975	9.64114e+07	1.61694e+08			1001.2	11895.9			5.12773e+07
1010	38875	30732.7	55600	97645850	9.64421e+07	1.61749e+08			1003.3	11777.8			5.12891e+07
1010	38775	30620.7	55433.3	97684625	9.64727e+07	1.61805e+08			1005.4	11553.2			5.13006e+07
1010	38475	30467.8	54966.7	97723100	9.65032e+07	1.6186e+08			1007.5	11359			5.1312e+07
1010	38400	30460.2	54800	97761500	9.65337e+07	1.61914e+08			1009.7	11230.5			5.13232e+07
1010	38125	30048.5	54566.7	97799625	9.65637e+07	1.61969e+08			1011.8	10904.3			5.13341e+07
1020	38025	29730.7	54266.7	97837650	9.65934e+07	1.62023e+08			1014	10775.7			5.13449e+07
1020	37875	29627.4	54066.7	97875525	9.66231e+07	1.62077e+08			1016.2	10586.6			5.13555e+07
1020	37600	29522.5	53666.7	97913125	9.66526e+07	1.62131e+08			1018.3	10405.5			5.13659e+07
1020	37475	29321.2	53600	97950600	9.66819e+07	1.62185e+08			1020.5	10333.9			5.13762e+07
1020	37275	28992.7	53166.7	97987875	9.67109e+07	1.62238e+08			1022.6	9995.75			5.13862e+07
1030	37150	28996.7	52766.7	98025025	9.67399e+07	1.62291e+08			1024.8	9742.61			5.13959e+07
1030	36850	28740.8	52533.3	98061875	9.67686e+07	1.62343e+08			1026.9	9746.61			5.14057e+07
1030	36650	28525.1	52300	98098525	9.67972e+07	1.62395e+08			1029	9527.5			5.14152e+07
1030	36600	28369	52133.3	98135125	9.68255e+07	1.62448e+08			1031.1	9254.35			5.14245e+07
1030	36450	28273.9	51833.3	98171575	9.68538e+07	1.62499e+08			1033.2	9163.81			5.14336e+07
1040	36300	28013.5	51333.3	98207875	9.68818e+07	1.62551e+08			1035.3	8807.13			5.14424e+07
1040	36050	27923	50900	98243925	9.69097e+07	1.62602e+08			1037.3	8766.61			5.14512e+07
1040	35950	27643.9	50566.7	98279875	9.69374e+07	1.62652e+08			1039.4	8507.99			5.14597e+07
1040	35800	27501.7	50366.7	98315675	9.69649e+07	1.62703e+08			1041.5	8354.92			5.14681e+07
1050	35550	27286.4	49933.3	98351225	9.69922e+07	1.62752e+08			1043.7	8256.37			5.14763e+07
1050	35525	27134.3	49833.3	98386750	9.70193e+07	1.62802e+08			1045.8	8033.27			5.14844e+07
1050	35225	27111.4	49533.3	98421975	9.70464e+07	1.62852e+08			1047.9	7907.72			5.14923e+07
1050	35250	26953.4	49200	98457225	9.70734e+07	1.62901e+08			1050	7557.57			5.14998e+07
1050	35000	26600	49066.7	98492225	9.71e+07	1.6295e+08			1052.1	7356.49			5.15072e+07
1060	34750	26505.5	48633.3	98526975	9.71265e+07	1.62999e+08			1054.1	7211.43			5.15144e+07
1060	34625	26441.3	48300	98561600	9.71529e+07	1.63047e+08			1056.2	6999.85			5.15214e+07
1060	34500	26045.4	48133.3	98596100	9.7179e+07	1.63095e+08
1060	34300	26076.8	47933.3	98630400	9.7205e+07	1.63143e+08
1060	34100	25777.2	47733.3	98664500	9.72308e+07	1.63191e+08
1070	33950	25751	47533.3	98698450	9.72566e+07	1.63238e+08
1070	33825	25534.8	47166.7	98732275	9.72821e+07	1.63286e+08
1070	33750	25518.8	46800	98766025	9.73076e+07	1.63332e+08
1070	33575	25254.1	46566.7	98799600	9.73329e+07	1.63379e+08
1080	33350	25132.4	46400	98832950	9.7358e+07	1.63425e+08
1080	33250	24885.7	46066.7	98866200	9.73829e+07	1.63471e+08
1080	33075	24759.4	45900	98899275	9.74077e+07	1.63517e+08
1080	33000	24563.3	45566.7	98932275	9.74322e+07	1.63563e+08
1080	32925	24440	45200	98965200	9.74567e+07	1.63608e+08
1090	32675	24225.2	45066.7	98997875	9.74809e+07	1.63653e+08
1090	32600	24148.8	44900	99030475	9.7505e+07	1.63698e+08
1090	32525	24089	44533.3	99063000	9.75291e+07	1.63743e+08
1090	32150	23889.4	44300	99095150	9.7553e+07	1.63787e+08
1090	32225	23810	44000	99127375	9.75768e+07	1.63831e+08
1100	32075	23561.3	43733.3	99159450	9.76004e+07	1.63875e+08
1100	31900	23389.2	43600	99191350	9.76238e+07	1.63918e+08
1100	31750	23311.8	43200	99223100	9.76471e+07	1.63961e+08
1100	31575	23269.9	43233.3	99254675	9.76704e+07	1.64005e+08
1100	31450	23082	42800	99286125	9.76934e+07	1.64047e+08
1110	31200	22950.7	42633.3	99317325	9.77164e+07	1.6409e+08
1110	31275	22708.2	42366.7	99348600	9.77391e+07	1.64132e+08
1110	30950	22497.8	42200	99379550	9.77616e+07	1.64175e+08
1110	31025	22316.7	41866.7	99410575	9.77839e+07	1.64216e+08
1110	30675	22323.8	41666.7	99441250	9.78062e+07	1.64258e+08
1120	30600	22209.8	41366.7	99471850	9.78284e+07	1.643e+08
1120	30600	22015.7	41133.3	99502450	9.78505e+07	1.64341e+08
1120	30350	21861.5	41066.7	99532800	9.78723e+07	1.64382e+08
1120	30225	21769.7	40666.7	99563025	9.78941e+07	1.64422e+08
1130	30150	21779.4	40366.7	99593175	9.79159e+07	1.64463e+08
1130	29925	21597.2	40266.7	99623100	9.79375e+07	1.64503e+08
1130	29975	21346.4	40033.3	99653075	9.79588e+07	1.64543e+08
1130	29675	21350.2	39900	99682750	9.79802e+07	1.64583e+08
1130	29575	21131	39633.3	99712325	9.80013e+07	1.64623e+08
1140	29400	21025.5	39466.7	99741725	9.80223e+07	1.64662e+08
1140	29250	20829.8	39066.7	99770975	9.80431e+07	1.64701e+08
1140	29200	20846.7	38900	99800175	9.8064e+07	1.6474e+08
1140	29025	20644.3	38766.7	99829200	9.80846e+07	1.64779e+08
1140	28950	20596	38566.7	99858150	9.81052e+07	1.64817e+08
1150	28775	20353.6	38233.3	99886925	9.81256e+07	1.64856e+08
1150	28750	20283	38166.7	99915675	9.81459e+07	1.64894e+08
1150	28525	20027.7	38000	99944200	9.81659e+07	1.64932e+08
1150	28475	20065.8	37566.7	99972675	9.8186e+07	1.64969e+08
1150	28325	19903.9	37466.7	100001000	9.82059e+07	1.65007e+08
1160	28175	19855.7	37366.7	100029175	9.82257e+07	1.65044e+08
1160	28100	19710.9	37233.3	100057275	9.82454e+07	1.65081e+08
1160	27850	19575.1	37000	100085125	9.8265e+07	1.65118e+08
1160	27825	19496.3	36733.3	100112950	9.82845e+07	1.65155e+08
1170	27700	19263.9	36533.3	100140650	9.83038e+07	1.65192e+08
1170	27725	19325.1	36300	100168375	9.83231e+07	1.65228e+08
1170	27550	19001.1	36200	100195925	9.83421e+07	1.65264e+08
1170	27450	19099.4	35900	100223375	9.83612e+07	1.653e+08
1170	27275	18829.3	35800	100250650	9.838e+07	1.65336e+08
1180	27150	18761.6	35466.7	100277800	9.83988e+07	1.65371e+08
1180	27075	18664	35166.7	100304875	9.84175e+07	1.65406e+08
1180	26850	18522	35066.7	100331725	9.8436e+07	1.65442e+08
1180	26900	18479.1	34966.7	100358625	9.84545e+07	1.65477e+08
1180	26700	18422.5	34766.7	100385325	9.84729e+07	1.65511e+08
1190	26650	18278.6	34466.7	100411975	9.84912e+07	1.65546e+08
1190	26550	18071.2	34133.3	100438525	9.85092e+07	1.6558e+08
1190	26450	18108.9	34433.3	100464975	9.85273e+07	1.65614e+08
1190	26325	17957.1	33966.7	100491300	9.85453e+07	1.65648e+08
1200	26150	17806.3	33900	100517450	9.85631e+07	1.65682e+08
1200	26050	17706.2	33633.3	100543500	9.85808e+07	1.65716e+08
1200	25925	17623.4	33533.3	100569425	9.85984e+07	1.65749e+08
1200	25850	17521.8	33100	100595275	9.86159e+07	1.65782e+08
1200	25750	17386.4	33033.3	100621025	9.86333e+07	1.65815e+08
1210	25650	17342.6	32833.3	100646675	9.86507e+07	1.65848e+08
1210	25550	17205	32833.3	100672225	9.86679e+07	1.65881e+08
1210	25475	17123.3	32733.3	100697700	9.8685e+07	1.65914e+08
1210	25375	17100.2	32433.3	100723075	9.87021e+07	1.65946e+08
1210	25225	17024.7	32333.3	100748300	9.87191e+07	1.65979e+08
1220	25125	16717.4	32000	100773425	9.87358e+07	1.66011e+08
1220	25050	16731.2	31866.7	100798475	9.87526e+07	1.66043e+08
1220	25000	16651.8	31700	100823475	9.87692e+07	1.66074e+08
1220	24825	16529.5	31433.3	100848300	9.87858e+07	1.66106e+08
1220	24800	16317.2	31300	100873100	9.88021e+07	1.66137e+08
1230	24625	16382.6	31066.7	100897725	9.88185e+07	1.66168e+08
1230	24500	16238.9	31033.3	100922225	9.88347e+07	1.66199e+08
1230	24375	16216.3	30733.3	100946600	9.88509e+07	1.6623e+08
1230	24350	16084.6	30666.7	100970950	9.8867e+07	1.6626e+08
1240	24275	15931.2	30433.3	100995225	9.88829e+07	1.66291e+08
1240	24150	15943.5	30400	101019375	9.88989e+07	1.66321e+08
1240	24000	15777.2	30200	101043375	9.89147e+07	1.66351e+08
1240	24000	15812.6	30000	101067375	9.89305e+07	1.66381e+08
1240	23875	15613.7	29966.7	101091250	9.89461e+07	1.66411e+08
1250	23700	15523.8	29800	101114950	9.89616e+07	1.66441e+08
1250	23600	15453.6	29566.7	101138550	9.89771e+07	1.66471e+08
1250	23625	15365.9	29400	101162175	9.89924e+07	1.665e+08
1250	23475	15189.2	29366.7	101185650	9.90076e+07	1.6653e+08
1250	23500	15174.7	29166.7	101209150	9.90228e+07	1.66559e+08
1260	23225	15079.1	29033.3	101232375	9.90379e+07	1.66588e+08
1260	23200	14945.3	28800	101255575	9.90528e+07	1.66617e+08
1260	23200	15005.2	28633.3	101278775	9.90678e+07	1.66645e+08
1260	23050	14783	28533.3	101301825	9.90826e+07	1.66674e+08
1260	22900	14689.5	28400	101324725	9.90973e+07	1.66702e+08
1270	22875	14675.9	28200	101347600	9.9112e+07	1.6673e+08
1270	22825	14624.9	28066.7	101370425	9.91266e+07	1.66758e+08
1270	22675	14512.7	27933.3	101393100	9.91411e+07	1.66786e+08
1270	22650	14457.1	27800	101415750	9.91556e+07	1.66814e+08
1280	22525	14389.9	27766.7	101438275	9.91699e+07	1.66842e+08
1280	22425	14296.6	27500	101460700	9.91842e+07	1.66869e+08
1280	22250	14182.1	27433.3	101482950	9.91984e+07	1.66897e+08
1280	22275	13989.6	27133.3	101505225	9.92124e+07	1.66924e+08
1280	22150	13944.9	27066.7	101527375	9.92264e+07	1.66951e+08
1290	22175	13973.9	26833.3	101549550	9.92403e+07	1.66978e+08
1290	21975	13819.8	26800	101571525	9.92542e+07	1.67005e+08
1290	21875	13776.1	26633.3	101593400	9.92679e+07	1.67031e+08
1290	21875	13691.5	26466.7	101615275	9.92816e+07	1.67058e+08
1290	21875	13605.4	26266.7	101637150	9.92952e+07	1.67084e+08
1300	21650	13600.8	26133.3	101658800	9.93088e+07	1.6711e+08
1300	21550	13448.2	26066.7	101680350	9.93223e+07	1.67136e+08
1300	21475	13368.6	25900	101701825	9.93356e+07	1.67162e+08
1300	21425	13296.4	25733.3	101723250	9.93489e+07	1.67188e+08
1300	21400	13307.4	25700	101744650	9.93622e+07	1.67214e+08
1310	21225	13151.9	25400	101765875	9.93754e+07	1.67239e+08
1310	21100	13051.4	25300	101786975	9.93885e+07	1.67264e+08
1310	21025	12940.3	25366.7	101808000	9.94014e+07	1.6729e+08
1310	20975	12989.2	25166.7	101828975	9.94144e+07	1.67315e+08
1320	20950	12815.7	24966.7	101849925	9.94272e+07	1.6734e+08
1320	20825	12786.7	24766.7	101870750	9.944e+07	1.67365e+08
1320	20700	12756.7	24700	101891450	9.94527e+07	1.67389e+08
1320	20650	12683.8	24533.3	101912100	9.94654e+07	1.67414e+08
1320	20425	12614.7	24466.7	101932525	9.9478e+07	1.67438e+08
1330	20425	12612.4	24266.7	101952950	9.94907e+07	1.67463e+08
1330	20450	9319.29	24133.3	101973400	9.95e+07	1.67487e+08
1330	20300	8565.87	24033.3	101993700	9.95085e+07	1.67511e+08
1330	20275	8484.31	23933.3	102013975	9.9517e+07	1.67535e+08
1330	20175	8482.81	23933.3	102034150	9.95255e+07	1.67559e+08
1340	20075	8410.76	23866.7	102054225	9.95339e+07	1.67582e+08
1340	20000	8374.37	23566.7	102074225	9.95423e+07	1.67606e+08
1340	20050	10149.7	23566.7	102094275	9.95524e+07	1.6763e+08
1340	19925	11720.3	23500	102114200	9.95642e+07	1.67653e+08
1340	19750	11863.6	23200	102133950	9.9576e+07	1.67676e+08
1350	19675	11909.9	23100	102153625	9.95879e+07	1.67699e+08
1350	19575	11871.1	23000	102173200	9.95998e+07	1.67722e+08
1350	19600	11690.6	22833.3	102192800	9.96115e+07	1.67745e+08
1350	19600	11709.6	22766.7	102212400	9.96232e+07	1.67768e+08
1360	19450	11603.4	22700	102231850	9.96348e+07	1.67791e+08
1360	19325	11610.1	22533.3	102251175	9.96464e+07	1.67813e+08
1360	19250	11509.3	22366.7	102270425	9.96579e+07	1.67836e+08
1360	19225	11399.1	22333.3	102289650	9.96693e+07	1.67858e+08
1360	19225	11412.6	22233.3	102308875	9.96807e+07	1.6788e+08
1370	19075	11240	22100	102327950	9.9692e+07	1.67902e+08
1370	18950	11215	21933.3	102346900	9.97032e+07	1.67924e+08
1370	18975	11199.5	21900	102365875	9.97144e+07	1.67946e+08
1370	18850	11073.1	21633.3	102384725	9.97255e+07	1.67968e+08
1370	18725	11097.2	21500	102403450	9.97366e+07	1.67989e+08

## Sheet: Figure 2
Th/U RSF
	Graphite						Silicon
N	O	+-	O2	+-	O3	+-	O	+-	O2	+-	O3	+-			Summary	Graphite			Silicon
1	0.640038	0.0119846	0.672492	0.0194226	0.669596	0.0274257	0.813038	0.0263748	0.757275	0.0190157	0.68726	0.0275495				O	O2	O3	O	O2	O3
2	0.649103	0.0101772	0.673606	0.00991394	0.674829	0.0133846	0.791483	0.0170811	0.793012	0.0212008	0.617478	0.0179658			WM	0.668771	0.663527	0.666	0.7899	0.774722	0.625272
3	0.658179	0.0177806	0.657808	0.0121489	0.708271	0.020089	0.766021	0.0120744	0.795964	0.019178	0.642529	0.0170077			SEM	0.00309674	0.00692456	0.003	0.00815874	0.00536636	0.00653663
4	0.679093	0.0155176	0.683504	0.0134459	0.668292	0.00887622	0.79103	0.0243049	0.771286	0.0181565	0.627492	0.0141693			95% CI	0.00830773	0.0204496	0.01	0.0280349	0.012	0.0168972
5	0.661921	0.0151016	0.67131	0.0140978	0.725531	0.0188044	0.795405	0.0209958	0.772815	0.0138277	0.643736	0.0120985			2SD	0.037	0.046	0.036	0.053	0.04	0.055
6	0.659672	0.0184294	0.619422	0.0198351	0.660643	0.017477	0.84177	0.0174799	0.802354	0.0306013	0.608977	0.0231277			N	47	15	44	15	13	15
7	0.692262	0.0209944	0.617527	0.0182654	0.664144	0.0133	0.804944	0.0275401	0.735469	0.023399	0.634821	0.0303555			Neff	35.5033	11.0777	33.77	10.3835	10.4327	11.5376
8	0.653118	0.0271583	0.674168	0.0237855	0.676282	0.017207	0.790219	0.0187239	0.754869	0.0289789	0.619253	0.0201518			MSWD	1.74263	1.75672	2.39	2.30731	0.599701	1.34597
9	0.650049	0.0114627	0.626063	0.0198059	0.663305	0.0111909	0.831018	0.0273642	0.796959	0.0297134	0.60064	0.0159604			MSWD uncertainty	0.24076	0.445486	0.25	0.461671	0.460465	0.435656
10	0.664338	0.0135295	0.630822	0.021432	0.636343	0.0182392	0.782863	0.0211414	0.776485	0.0150803	0.61634	0.0212999			t-value (alpha = 0.05)	2.03224	2.22814	2.03693	2.26216	2.26216	2.22814
11	0.708414	0.018045	0.705495	0.0183485	0.654683	0.0104929	0.783742	0.0271995	0.789934	0.0204303	0.624403	0.0230579
12	0.687729	0.0134951	0.68112	0.0401908	0.66722	0.0182	0.773779	0.0380594	0.759768	0.0219187	0.648279	0.018767
13	0.656263	0.0157273	0.658362	0.0135509	0.657379	0.0178061	0.791619	0.0255592	0.773198	0.0261672	0.603139	0.0248028
14	0.701884	0.0163576	0.660926	0.0172882	0.655358	0.00962411	0.775399	0.0345964			0.564943	0.0322237
15	0.71032	0.0226525	0.681244	0.0169086	0.634707	0.0109584	0.745016	0.022329			0.606196	0.0161998
16	0.677435	0.0133809			0.639469	0.00755612
17	0.680207	0.0118969			0.678531	0.00938965
18	0.666091	0.0212096			0.662676	0.00969621
19	0.669353	0.0191537			0.698341	0.0162923
20	0.662267	0.0195439			0.668829	0.0118074
21	0.644582	0.0116887			0.68363	0.0124713
22	0.668114	0.0181553			0.660007	0.0102656
23	0.657075	0.0134346			0.692524	0.0141522
24	0.689235	0.0234037			0.707159	0.0228421
25	0.665208	0.0131677			0.683047	0.0191064
26	0.671595	0.0118005			0.692487	0.0126667
27	0.679082	0.0207382			0.677344	0.0146663
28	0.720088	0.0167591			0.661128	0.00898852
29	0.708184	0.0316603			0.660513	0.0121775
30	0.657436	0.00918812			0.693376	0.0119543
31	0.693043	0.0126132			0.643206	0.0135843
32	0.662909	0.0146122			0.635298	0.0138596
33	0.670886	0.0172635			0.648921	0.0205261
34	0.696974	0.0294438			0.667715	0.00917002
35	0.687703	0.0172292			0.652904	0.0117858
36	0.690594	0.0217057			0.680618	0.0179059
37	0.684681	0.0136852			0.653831	0.0171123
38	0.672568	0.0171041			0.656435	0.0149295
39	0.66288	0.0158677			0.652606	0.0100909
40	0.675901	0.0219721			0.693476	0.0104522
41	0.647344	0.0110163			0.663065	0.0156529
42	0.673788	0.0149064			0.665125	0.00883106
43	0.673478	0.0225082			0.67898	0.00988958
44	0.666369	0.0159833			0.67764	0.0108375
45	0.694273	0.0408139
46	0.644764	0.0200388
47	0.675758	0.0225216

## Sheet: Figure 3
Th/U RSF trends
Note: The data for individual traces are displayed continuously split by "nans"
Graphite																								Silicon
All Traces										Average														All Traces										Average
O			O2			O3				O				O2				O3						O			O2			O3				O				O2				O3
Time	RSF	+-	Time	RSF	+-	Time	RSF	+-		Time	+-	RSF	+-	Time	+-	RSF	+-	Time	+-	RSF	+-			Time	RSF	+-	Time	RSF	+-	Time	RSF	+-		Time	+-	RSF	+-	Time	+-	RSF	+-	Time	+-	RSF	+-
19.281	0.593783	0.0626609	19.051	0.558876	0.072846	20.8945	0.750713	0.147452		19.3291	0.999604	0.607398	0.0110855	19.4722	1.0097	0.660059	0.030961	19.5965	0.877048	0.638722	0.014332			19.021	0.501698	0.0825912	17.48	0.42806	0.0618566	20.305	0.534084	0.0741541		19.6354	1.00543	0.58852	0.073477	19.1666	1.09893	0.653257	0.0414162	19.6587	0.900102	0.552881	0.0238957
47.502	0.648784	0.0613765	47.2875	0.58289	0.0707686	49.136	0.678122	0.141618		47.6187	0.992725	0.632585	0.0151508	47.7887	0.986124	0.577385	0.0174701	47.895	0.898702	0.621445	0.0142761			47.3285	0.657802	0.105487	45.752	0.841488	0.0898252	48.564	0.739235	0.0872328		47.9339	0.978597	0.826052	0.0531558	47.4703	1.08289	0.771804	0.0144185	47.9372	0.910548	0.630707	0.0175319
75.744	0.564564	0.0548956	75.5375	0.632585	0.0717112	77.423	0.551785	0.126792		75.9308	0.981289	0.638335	0.0151008	76.1155	1.00428	0.634939	0.0212344	76.2311	0.916463	0.611118	0.0114838			75.795	0.920415	0.124298	74.0905	0.633869	0.0764014	76.777	0.763291	0.0907058		76.2604	0.942268	0.814263	0.0305335	75.7893	1.08463	0.749238	0.0198015	76.2347	0.914119	0.623591	0.0269731
104.164	0.651115	0.0571749	103.793	0.630167	0.0709833	105.77	0.637149	0.139259		104.222	0.968894	0.66338	0.0129643	104.439	1.01667	0.636506	0.0160608	104.534	0.886836	0.635292	0.0129801			104.088	0.839147	0.117678	102.379	0.840865	0.0863881	105.034	0.553291	0.0791411		104.588	0.904727	0.756137	0.0399089	104.104	1.09211	0.795745	0.0295754	104.553	0.936476	0.63295	0.0255705
132.47	0.593619	0.0529441	132.085	0.506302	0.0628689	134.093	0.677901	0.144759		132.518	0.976902	0.666008	0.0135062	132.751	1.03937	0.603486	0.0244985	132.842	0.849345	0.642367	0.0107737			132.327	0.540994	0.0943149	130.625	0.777885	0.0821032	133.365	0.756385	0.0961909		132.873	0.880992	0.76163	0.0448919	132.419	1.11469	0.735659	0.0261545	132.87	0.957992	0.62908	0.0281797
160.889	0.729566	0.0575734	160.423	0.627322	0.0706626	162.427	0.466744	0.12073		160.814	0.967409	0.657799	0.0100982	161.067	1.06369	0.636513	0.0162698	161.151	0.868227	0.641843	0.0121226			160.546	0.821799	0.116391	158.954	0.840199	0.0845577	161.583	0.635761	0.0928607		161.15	0.916741	0.831264	0.0163294	160.718	1.12538	0.797433	0.0197479	161.18	0.923203	0.613166	0.0259918
189.198	0.561764	0.0501016	188.804	0.735908	0.0776697	190.716	0.824525	0.16196		189.125	0.950381	0.667977	0.0114226	189.37	1.03806	0.628955	0.0252816	189.446	0.87061	0.665827	0.0109275			188.804	0.925852	0.12391	187.256	0.75724	0.0808259	189.837	0.704195	0.103976		189.442	0.924475	0.80309	0.0312305	189	1.14797	0.810979	0.0288026	189.504	0.884106	0.646098	0.0176661
217.439	0.655616	0.053243	217.046	0.640101	0.0735127	219.064	0.73909	0.151104		217.434	0.961879	0.664574	0.0112126	217.691	1.0521	0.665448	0.0168383	217.74	0.851781	0.650383	0.0129547			217.104	0.744195	0.1111	215.589	0.820416	0.0838455	218.077	0.570158	0.0994029		217.772	0.915726	0.786293	0.0352114	217.304	1.15077	0.792247	0.0305965	217.785	0.862412	0.575425	0.0263078
245.766	0.684625	0.0543632	245.301	0.604594	0.073405	247.379	0.621518	0.139201		245.741	0.974473	0.662197	0.0110512	246.009	1.06468	0.65534	0.0183772	246.046	0.857899	0.656506	0.015417			245.571	1.04672	0.133145	243.84	0.621284	0.0733064	246.387	0.729125	0.118464		246.144	0.917875	0.806414	0.0388968	245.61	1.1426	0.839311	0.0312697	246.086	0.849896	0.619167	0.0275016
273.986	0.579859	0.0495972	273.53	0.902472	0.0927226	275.624	0.873863	0.165407		274.055	0.985745	0.667785	0.0107574	274.309	1.06293	0.671052	0.032513	274.363	0.870135	0.719864	0.0166024			274.062	0.87124	0.122182	272.17	0.704319	0.0788437	274.625	0.74325	0.127677		274.477	0.909975	0.7838	0.0420614	273.939	1.12007	0.762157	0.017492	274.36	0.866407	0.653825	0.0199072
302.25	0.654742	0.0526551	301.754	0.845378	0.0934847	303.854	0.553237	0.134412		302.349	0.993064	0.674023	0.0123883	302.6	1.06139	0.659103	0.0239764	302.668	0.866205	0.682698	0.0125856			302.373	0.753886	0.113821	300.459	0.712841	0.0797982	302.865	0.703251	0.135588		302.796	0.917303	0.787145	0.03677	302.256	1.12516	0.782464	0.026816	302.654	0.893923	0.607951	0.0246351
330.546	0.626335	0.051373	330.165	0.721725	0.0910484	332.099	0.665535	0.145467		330.641	0.980327	0.679027	0.012187	330.914	1.03013	0.672841	0.0191252	330.965	0.86866	0.693859	0.00947152			330.79	0.574152	0.100098	328.805	0.845037	0.0872777	331.267	0.639416	0.139821		331.124	0.935557	0.810689	0.0596527	330.539	1.11263	0.836177	0.0262375	330.981	0.930179	0.669079	0.0177263
358.926	0.671823	0.0530139	358.506	0.761005	0.0983796	360.416	0.652405	0.142595		358.94	0.974208	0.683364	0.0124413	359.26	1.01858	0.714483	0.021725	359.27	0.859679	0.690086	0.0103879			359.036	0.918288	0.12633	357.132	0.935307	0.0932008	359.492	0.780931	0.170788		359.394	0.928763	0.767622	0.0285907	358.835	1.11794	0.782504	0.0252054	359.313	0.926861	0.623777	0.0288063
387.197	0.6001	0.0500668	386.866	0.73938	0.102677	388.644	0.779552	0.156157		387.234	0.97196	0.689031	0.00951676	387.606	1.04797	0.665286	0.02183	387.555	0.861032	0.711424	0.0168292			387.267	0.908308	0.127385	385.441	0.873679	0.0917137	387.74	0.632688	0.175989		387.697	0.907831	0.773347	0.0381027	387.169	1.14455	0.781923	0.0264255	387.625	0.94104	0.645406	0.0170052
415.43	0.715195	0.0546051	415.197	0.807579	0.11325	416.972	0.632109	0.141575		415.54	0.983994	0.704875	0.0114777	415.945	1.06701	0.742008	0.017391	415.861	0.877496	0.673485	0.0160596			415.523	0.726833	0.113682	413.666	0.858875	0.0922081	416.002	1.15964	0.282061		415.997	0.886488	0.792933	0.0312002	415.488	1.15601	0.80137	0.0218499	415.928	0.945155	0.688915	0.039411
443.761	0.594615	0.049782	443.587	0.612217	0.10364	445.216	0.635306	0.142291		443.845	0.992109	0.709444	0.0111173	444.247	1.08268	0.738527	0.0483203	444.157	0.899306	0.726959	0.0187685			443.742	0.732015	0.114493	441.923	0.758635	0.0883052	444.393	0.836627	0.317823		444.264	0.911951	0.828482	0.0293111	443.762	1.16128	0.75382	0.0226856	444.234	0.935492	0.60452	0.0388891
472.159	0.7392	0.0554804	471.933	0.83418	0.128922	473.433	0.623341	0.13961		472.151	0.982026	0.703894	0.0164697	472.581	1.08393	0.734691	0.0234855	472.444	0.90089	0.702438	0.0162968			471.991	1.06106	0.139551	470.298	0.871121	0.0963336	472.644	0.872307	0.439802		472.56	0.91686	0.820905	0.0498686	472.071	1.14101	0.793782	0.0294475	472.526	0.922733	0.639141	0.026248
500.546	0.65061	0.0524922	500.178	0.566107	0.113424	501.692	0.74596	0.155794		500.463	0.989199	0.685157	0.0140044	500.856	1.08333	0.696141	0.024743	500.757	0.875401	0.745843	0.0245496			500.382	1.01604	0.137223	498.567	0.691581	0.0872434	500.95	1.12282	0.566233		500.858	0.907202	0.83716	0.0385329	500.385	1.13404	0.802676	0.03395	500.838	0.920992	0.669774	0.0425236
528.868	0.602949	0.0503047	528.505	0.829121	0.149184	530.018	0.661025	0.148055		528.774	0.990056	0.718527	0.0203175	529.137	1.09843	0.740484	0.0217594	529.072	0.877975	0.755578	0.018659			528.862	0.908385	0.13132	526.882	0.674983	0.087989	529.335	1.83728	0.927121		529.173	0.914514	0.891732	0.0173355	528.722	1.13526	0.866668	0.0364398	529.022	0.882298	0.697532	0.0986449
557.088	0.650291	0.0524665	556.808	0.731978	0.152939	558.322	0.820803	0.164426		557.066	0.985572	0.707166	0.0115983	557.453	1.10116	0.775699	0.0860786	557.364	0.866466	0.749103	0.0152612			557.123	0.926256	0.133905	555.264	0.776474	0.0957066	557.585	0.908454	0.937328		557.435	0.916703	0.865073	0.0304636	557.047	1.11355	0.785607	0.0223086	557.302	0.868614	0.622384	0.0499108
nan	nan	nan	nan	nan	nan	nan	nan	nan																nan	nan	nan	nan	nan	nan	nan	nan	nan
19.031	0.603566	0.055392	19.281	0.599429	0.0423349	17.297	0.541882	0.077504																19.28	0.765417	0.05168	18.982	0.634088	0.0799864	20.775	0.567761	0.0652033
47.351	0.602042	0.0511239	47.614	0.677565	0.0430022	45.524	0.519657	0.0645253																47.6045	0.664558	0.0486606	47.302	0.719722	0.082124	49.104	0.588745	0.0650929
75.732	0.621414	0.0490339	75.994	0.590005	0.0391265	73.798	0.66113	0.0668622																75.905	0.712019	0.0497984	75.6035	0.747006	0.0820998	77.359	0.615331	0.0664325
103.973	0.667261	0.0487289	104.242	0.730101	0.0430168	102.278	0.728243	0.0660141																104.266	0.786406	0.0521593	103.894	0.75129	0.0815935	105.794	0.659807	0.0692519
132.229	0.650665	0.0467762	132.495	0.647902	0.0401633	130.799	0.564552	0.0554188																132.549	0.715054	0.0494124	132.244	0.924685	0.0908028	134.151	0.620657	0.067801
160.5	0.62358	0.044828	160.791	0.685901	0.0412015	159.14	0.68778	0.0601649																160.809	0.833647	0.0532358	160.482	0.837986	0.0865489	162.4	0.447961	0.0578975
188.799	0.667535	0.0455879	189.052	0.614175	0.0390553	187.451	0.654054	0.0578792																189.058	0.753978	0.050564	188.728	0.870102	0.0889274	190.694	0.634903	0.0701992
217.03	0.613236	0.0434183	217.376	0.68146	0.041383	215.825	0.596434	0.0547364																217.498	0.709931	0.0492933	217.145	0.906414	0.0921627	219.031	0.680045	0.0747389
245.264	0.698818	0.046045	245.757	0.688313	0.0419537	244.168	0.729022	0.0606194																245.918	0.813913	0.0530632	245.526	0.730565	0.0844666	247.442	0.593945	0.0721149
273.5	0.590953	0.0420503	274.001	0.665921	0.0418452	272.394	0.757462	0.0617224																274.158	0.70008	0.0496949	273.771	0.744638	0.0866748	275.75	0.681003	0.0792668
301.82	0.663292	0.0444789	302.332	0.663323	0.0422677	300.651	0.691673	0.0591664																302.438	0.708462	0.050417	302.132	0.722875	0.0871365	304.019	0.548654	0.0727619
330.24	0.690121	0.0451794	330.622	0.674852	0.0433548	328.9	0.727121	0.0613124																330.718	0.686572	0.0502735	330.396	0.716079	0.0889344	332.403	0.657113	0.082897
358.541	0.556452	0.0404184	358.964	0.682339	0.0444807	357.19	0.746873	0.0618917																358.958	0.791535	0.0549633	358.641	0.830559	0.0980176	360.759	0.739	0.0925025
386.865	0.644071	0.0434824	387.293	0.684022	0.045768	385.442	0.739358	0.0623449																387.198	0.791331	0.0557584	386.897	0.845924	0.101249	389.115	0.678553	0.093337
415.106	0.654699	0.0439024	415.587	0.668679	0.0464279	413.689	0.692164	0.0607809																415.538	0.748023	0.0553711	415.187	0.829636	0.103048	417.404	0.573209	0.0896503
443.384	0.690048	0.0451747	443.838	0.741477	0.0504079	441.931	0.74135	0.0638865																443.838	0.789103	0.0582552	443.443	0.775366	0.103758	445.655	0.632351	0.0989055
471.779	0.699235	0.0455823	472.168	0.814867	0.054408	470.238	0.594506	0.0586434																472.171	0.853088	0.0623094	471.678	0.944678	0.121138	473.906	0.672505	0.10519
500.061	0.678526	0.045	500.458	0.684636	0.0513832	498.652	0.671747	0.0629895																500.498	0.779989	0.0611764	499.993	0.867997	0.122941	502.17	0.620912	0.10365
528.382	0.722234	0.0464959	528.709	0.617609	0.0508281	527.054	0.646645	0.063179																528.799	0.931044	0.06893	528.234	0.865337	0.132175	nan	nan	nan
556.63	0.605955	0.0429025	557.041	0.748476	0.0579971	555.282	0.782177	0.0711989																557.039	0.914428	0.0706544	556.481	0.847954	0.141567	19.4325	0.619388	0.0661038
nan	nan	nan	nan	nan	nan	nan	nan	nan																nan	nan	nan	nan	nan	nan	47.7605	0.576987	0.0619291
18.841	0.610395	0.0943162	19.866	0.475572	0.0513353	19.8815	0.689023	0.0869205																19.189	0.690878	0.0864694	20.5665	0.746559	0.0810794	76.011	0.533841	0.0583103
47.102	0.684945	0.0942098	48.157	0.513814	0.0501964	48.202	0.568845	0.0741461																47.43	0.921502	0.0989353	48.818	0.734402	0.0783867	104.319	0.620523	0.0624372
75.443	0.717194	0.0919476	76.4085	0.745929	0.0581487	76.5325	0.560453	0.0718433																75.67	0.734011	0.0872227	77.128	0.78431	0.0793308	132.56	0.599721	0.0616002
103.75	0.601068	0.0811488	104.7	0.624769	0.0515922	104.788	0.685642	0.0782329																104.051	0.822733	0.0921076	105.459	0.854467	0.0819553	160.805	0.62825	0.0638635
132.043	0.691338	0.084567	132.95	0.640973	0.0513823	133.102	0.610888	0.0731019																132.293	0.824612	0.0917462	133.753	0.757308	0.0769915	189.139	0.624673	0.0645051
160.463	0.672327	0.0816328	161.247	0.591844	0.0487065	161.414	0.765954	0.0822253																160.554	0.7435	0.0871318	162.094	0.762612	0.0775312	217.514	0.729725	0.0713034
188.863	0.669206	0.080084	189.532	0.754602	0.0549662	189.673	0.705589	0.0780165																188.807	0.65065	0.0814315	190.417	0.827648	0.0808789	245.765	0.710875	0.072268
217.109	0.671527	0.0792374	217.823	0.602456	0.0492489	217.964	0.705343	0.0784694																217.188	0.881912	0.0952306	218.709	0.776361	0.0789299	274.085	0.530513	0.0639378
245.43	0.736103	0.0824031	246.154	0.66299	0.0518366	246.212	0.520292	0.0678145																245.412	0.793514	0.0905486	246.953	0.908432	0.086347	302.394	0.72429	0.0773066
273.832	0.641969	0.0762795	274.488	0.581191	0.048829	274.634	0.693569	0.079138																273.673	0.797366	0.0915853	275.209	0.813977	0.082757	330.726	0.670769	0.0770369
302.232	0.743182	0.0821749	302.794	0.750226	0.0558409	302.945	0.764322	0.0850352																301.994	0.838957	0.0951221	303.458	0.760022	0.0811231	359.022	0.709711	0.0831709
330.552	0.661158	0.0769513	331.026	0.679407	0.0536133	331.255	0.718946	0.0854328																330.305	0.864342	0.09738	331.755	0.78711	0.0840165	387.267	0.682625	0.0854371
358.838	0.630124	0.0743492	359.276	0.677719	0.053985	359.505	0.744869	0.0904476																358.698	0.699609	0.0889646	360.089	0.731774	0.0824361	415.606	0.636323	0.0883575
387.098	0.723754	0.0800254	387.529	0.644483	0.0532211	387.803	0.919327	0.105607																387.105	0.763287	0.0933736	388.387	0.866563	0.0919827	443.909	0.599335	0.0926072
415.398	0.57073	0.0708726	415.83	0.757377	0.0585126	416.054	0.718165	0.098783																415.325	0.769852	0.0956158	416.801	0.811453	0.0908453	472.148	0.63968	0.106775
443.712	0.811307	0.0842397	444.157	0.640357	0.0545766	444.462	0.771799	0.110418																443.56	0.791947	0.0976135	445.131	0.813076	0.092784	500.479	0.69776	0.125533
472.052	0.602497	0.0726173	472.57	0.745568	0.0601593	472.772	0.924758	0.132319																471.862	0.690272	0.0923624	473.453	0.722999	0.0897944	528.728	0.906053	0.165738
500.296	0.493343	0.0660009	500.877	0.657111	0.0577023	501.091	1.12799	0.159805																500.182	0.90343	0.107371	501.747	0.845097	0.0997345	557.019	0.955465	0.208991
528.559	0.549391	0.0698535	529.191	0.736387	0.0623167	529.506	0.898516	0.161681																528.471	0.923596	0.10977	530.154	0.949979	0.109131	nan	nan	nan
556.839	0.688071	0.0785094	557.516	0.700475	0.0622346	557.798	0.89796	0.179967																556.792	0.831216	0.105712	558.462	0.821096	0.105279	20.401	0.594567	0.057815
nan	nan	nan	nan	nan	nan	nan	nan	nan																nan	nan	nan	nan	nan	nan	48.7485	0.595793	0.057663
17.849	0.572217	0.0665943	17.5225	0.586087	0.0598847	20.0955	0.603338	0.0360457																20.14	0.809857	0.123692	20.08	0.782336	0.0795378	77.052	0.49637	0.0515251
46.2925	0.631496	0.0677824	45.8185	0.636572	0.0586704	48.311	0.582944	0.033877																48.48	0.861116	0.1258	48.32	0.837348	0.0799463	105.403	0.682808	0.0601921
74.706	0.749453	0.072544	74.0505	0.720836	0.0603569	76.732	0.669933	0.0354198																76.71	0.764782	0.116803	76.55	0.748243	0.0745477	133.712	0.535623	0.0530919
103.171	0.765291	0.0724059	102.306	0.650448	0.0560495	105.061	0.581818	0.0326778																104.98	0.742967	0.114814	104.8	0.789396	0.0757096	162.008	0.54886	0.0538791
131.597	0.663663	0.0671197	130.601	0.700176	0.0572422	133.371	0.702697	0.0358793																133.268	0.852939	0.122033	133.18	0.685227	0.0703885	190.252	0.652133	0.0577104
159.821	0.608386	0.063849	158.935	0.603938	0.0530305	161.601	0.656181	0.0348379																161.599	0.856972	0.12261	161.585	0.860768	0.0793497	218.505	0.632003	0.0582491
188.063	0.745065	0.0704909	187.266	0.761194	0.0591606	189.857	0.667753	0.035403																190.021	0.733792	0.113395	189.829	0.786297	0.0764719	246.714	0.671881	0.0614085
216.365	0.693184	0.06773	215.596	0.657451	0.0552398	218.07	0.668905	0.0359706																218.399	0.758796	0.115888	218.056	0.651903	0.0699747	274.964	0.688196	0.0631643
244.73	0.588572	0.0624587	243.899	0.57535	0.0517264	246.438	0.634387	0.035632																246.65	0.862254	0.124646	246.308	0.7805	0.0773817	303.293	0.604146	0.0601835
273.023	0.611388	0.0641642	272.228	0.80473	0.0616261	274.812	0.637924	0.0365255																274.94	0.845675	0.123542	274.562	0.703425	0.0742393	331.599	0.566165	0.0597455
301.347	0.799667	0.0737122	300.473	0.696139	0.0576859	303.166	0.693819	0.0391571																303.312	0.61435	0.105521	302.851	0.818383	0.0819477	359.886	0.657622	0.066851
329.574	0.689042	0.0686453	328.805	0.67631	0.0574351	331.522	0.627822	0.0384787																331.602	0.875312	0.127875	331.271	0.769551	0.079902	388.173	0.598243	0.0649629
357.823	0.757677	0.0726647	357.164	0.655819	0.0575888	359.773	0.764122	0.0438996																359.852	0.717389	0.116555	359.669	0.771379	0.0814161	416.424	0.639218	0.069415
386.212	0.677604	0.0692407	385.498	0.666051	0.0591743	388.082	0.744873	0.0449079																388.099	0.705224	0.116117	387.89	0.691932	0.0784432	444.726	0.627014	0.0710794
414.622	0.673385	0.0695376	413.728	0.718864	0.0628871	416.392	0.688112	0.0449525																416.428	0.935505	0.135244	416.149	0.823417	0.0873995	473.055	0.690118	0.077253
442.866	0.663955	0.0700704	441.971	0.711209	0.0642078	444.807	0.699745	0.047137																444.731	0.975532	0.139587	444.394	0.644762	0.0788671	501.537	0.789169	0.0862191
471.111	0.711893	0.0735167	470.441	0.643226	0.0628465	473.036	0.793135	0.0526068																473.217	0.779458	0.126646	472.726	0.897191	0.096325	529.846	0.756124	0.0886137
499.373	0.654362	0.0710598	498.69	0.813336	0.0725554	501.323	0.725428	0.0521549																501.601	0.76213	0.127227	501.115	0.761609	0.0918087	558.136	0.731353	0.0922639
527.665	0.688591	0.0739145	526.938	0.713066	0.0700087	529.802	0.740293	0.0551011																529.83	0.89703	0.140323	529.431	1.04354	0.110168	nan	nan	nan
555.888	0.617853	0.0709556	555.257	0.776734	0.0770081	558.063	0.687936	0.0553269																558.074	0.767869	0.131907	557.73	0.760464	0.0959389	20.0745	0.6118	0.0503498
nan	nan	nan	nan	nan	nan	nan	nan	nan																nan	nan	nan	nan	nan	nan	48.368	0.633232	0.0502806
19.291	0.633949	0.0769704	18.1635	0.625059	0.0686897	19.435	0.686402	0.0839636																20.72	0.829224	0.121137	17.5845	0.700581	0.0594975	76.7165	0.67201	0.0513065
47.531	0.537043	0.0666875	46.726	0.531828	0.0595252	47.79	0.541306	0.0682768																48.9605	0.81833	0.118292	45.8935	0.725302	0.0592977	104.957	0.637661	0.0498551
75.9125	0.631989	0.0690362	75.086	0.624551	0.0622174	76.1265	0.710853	0.0742036																77.262	0.763633	0.114004	74.151	0.670897	0.0559775	133.268	0.5257	0.0454634
104.223	0.548365	0.0621587	103.626	0.687776	0.0636628	104.375	0.641553	0.0684707																105.503	0.720467	0.110031	102.549	0.771724	0.0592702	161.569	0.705395	0.0529422
132.472	0.696503	0.068712	131.997	0.611357	0.0588956	132.623	0.731589	0.0721763																133.743	0.919002	0.124107	130.849	0.681091	0.0554964	189.983	0.685848	0.0525165
160.792	0.623702	0.0644042	160.217	0.548606	0.0554782	160.923	0.64896	0.0681102																161.983	0.885565	0.121825	159.165	0.850113	0.062093	218.219	0.658827	0.0519883
189.14	0.663321	0.0657566	188.466	0.679325	0.0608351	189.172	0.734405	0.0721052																190.244	0.865321	0.120178	187.435	0.769241	0.0592538	246.465	0.635697	0.0516249
217.355	0.716935	0.0678279	216.717	0.681691	0.0605647	217.412	0.706442	0.0714496																218.484	0.963504	0.127817	215.726	0.724079	0.0571407	274.707	0.551467	0.0484208
245.682	0.627058	0.0634156	244.96	0.690454	0.0608665	245.673	0.739059	0.0739994																246.892	0.75173	0.112225	244	0.761954	0.0590422	303.07	0.56134	0.0494788
274.086	0.654556	0.0648872	273.26	0.688962	0.0612111	273.962	0.681053	0.0722793																275.214	0.745177	0.112505	272.296	0.804557	0.0609051	331.438	0.733004	0.0574897
302.317	0.630746	0.0634658	301.5	0.679011	0.0610517	302.243	0.791306	0.0796336																303.594	0.740665	0.113118	300.687	0.830498	0.0625143	359.755	0.595265	0.0524707
330.562	0.734442	0.0688732	329.91	0.598433	0.0579186	330.534	0.719364	0.0790598																331.995	1.10501	0.139446	328.942	0.776309	0.061076	388.226	0.761687	0.060871
358.944	0.643851	0.0647851	358.31	0.685241	0.062371	358.94	0.725915	0.0833745																360.215	0.715706	0.113333	357.181	0.826209	0.0638342	416.555	0.550183	0.0529994
387.286	0.688817	0.0673031	386.637	0.79461	0.0679794	387.164	0.828552	0.0939431																388.515	0.774716	0.119723	385.493	0.812662	0.0637419	444.865	0.615316	0.0571969
415.539	0.7188	0.0692522	414.947	0.648154	0.0615931	415.407	0.88082	0.104684																416.795	0.76899	0.12028	413.888	0.789625	0.0641343	473.149	0.728905	0.0640108
443.784	0.700346	0.0687584	443.168	0.707561	0.0649428	443.658	0.799706	0.108983																445.035	0.812312	0.125538	442.233	0.79877	0.0655272	501.423	0.662337	0.0623822
472.084	0.762995	0.0725129	471.409	0.772319	0.0686222	471.992	0.865838	0.123882																473.255	0.978941	0.140076	470.615	0.793275	0.0659671	529.679	0.763031	0.0691713
500.416	0.711024	0.0708366	499.73	0.62761	0.0625222	500.298	1.00653	0.145524																501.495	0.792382	0.128747	498.902	0.837641	0.068262	557.967	0.64549	0.0659578
528.713	0.612454	0.0665064	527.97	0.833736	0.0729438	528.604	0.802348	0.142086																529.901	0.953061	0.143917	527.193	0.841227	0.0694805	nan	nan	nan
557.031	0.661335	0.0697938	556.21	0.766181	0.0706241	556.994	0.913177	0.167042																558.141	0.718759	0.127272	555.483	0.776764	0.0671911	18.324	0.446153	0.0802489
nan	nan	nan	nan	nan	nan	nan	nan	nan																nan	nan	nan	nan	nan	nan	46.5895	0.493497	0.0835338
20.68	0.476499	0.079525	17.581	0.616125	0.102841	20.321	0.628921	0.0826711																17.606	0.356749	0.067519	19.599	0.517519	0.103684	74.97	0.54495	0.0885259
48.96	0.687604	0.0904044	45.861	0.546137	0.0911536	48.706	0.663541	0.0772192																45.9775	0.910395	0.125246	47.918	0.679198	0.126343	103.381	0.791093	0.106823
77.201	0.635319	0.0828149	74.1665	0.515688	0.0848963	77.109	0.673972	0.0731828																74.4	0.930218	0.129201	76.2185	0.821367	0.141107	131.709	0.637872	0.0962964
105.461	0.733678	0.0865758	102.471	0.52657	0.0833702	105.348	0.610223	0.06665																102.809	0.551221	0.0975925	104.558	0.769039	0.136183	160.006	0.622287	0.0961556
133.781	0.756994	0.086379	130.713	0.712383	0.0953244	133.587	0.604879	0.063826																131.211	0.717913	0.110942	132.878	0.564295	0.115398	188.355	0.545967	0.0911252
162.082	0.707679	0.0823693	158.957	0.703917	0.0941909	161.957	0.672872	0.0657386																159.446	0.789234	0.115294	161.197	0.770663	0.13239	216.649	0.565991	0.0944689
190.494	0.658326	0.0787812	187.37	0.495535	0.0774903	190.315	0.67103	0.0640516																187.761	0.872051	0.122299	189.499	0.969707	0.148131	244.9	0.500175	0.0899702
218.734	0.56181	0.0726149	215.751	0.724631	0.0929028	218.643	0.568224	0.0577526																216.059	0.836975	0.119749	218.039	1.05838	0.154648	273.143	0.689128	0.107783
246.954	0.658617	0.0782588	244.08	0.602127	0.084423	247.069	0.676791	0.0623742																244.461	0.758859	0.114574	246.459	0.903592	0.143111	301.37	0.638781	0.105172
275.194	0.666608	0.0786567	272.482	0.482096	0.075388	275.471	0.710121	0.0630873																272.81	0.717849	0.112278	274.99	0.832808	0.137142	329.63	0.632936	0.10715
303.454	0.613339	0.0761667	300.884	0.610844	0.0848177	303.825	0.660192	0.0603346																301.103	0.951485	0.130904	303.42	0.773877	0.131027	358.027	0.563896	0.103118
331.774	0.635242	0.0777013	329.279	0.742633	0.0936879	332.135	0.713003	0.0623693																329.366	0.713697	0.115956	331.64	0.834851	0.135655	386.402	0.678602	0.114886
360.079	0.787983	0.0876686	357.678	0.719522	0.0922474	360.37	0.611935	0.0573742																357.611	0.840671	0.128405	359.901	0.729968	0.127283	414.803	0.630279	0.113386
388.378	0.554835	0.0742316	385.924	0.533346	0.0796086	388.601	0.71777	0.0618498																385.991	0.913382	0.136381	388.18	0.633389	0.117817	443.056	0.536163	0.107422
416.859	0.689322	0.0836976	414.248	0.75076	0.0947138	416.962	0.599791	0.056235																414.391	0.867787	0.135748	416.441	0.876768	0.13886	471.344	0.729154	0.129116
445.101	0.654018	0.0825012	442.494	0.64104	0.0881685	445.262	0.64464	0.0579548																442.62	0.816503	0.134455	444.697	0.709562	0.125644	499.612	0.781276	0.138352
473.361	0.511743	0.0739541	470.702	0.633644	0.0879853	473.567	0.607912	0.0560227																470.886	0.829821	0.138538	473.001	0.802465	0.133967	527.943	0.659134	0.132074
501.723	0.724812	0.0900187	498.95	0.642335	0.0891928	501.984	0.706395	0.060645																499.128	0.898876	0.150076	501.343	1.14921	0.161208	556.152	0.640824	0.133882
530.005	0.769772	0.0956064	527.186	0.719903	0.0954819	530.218	0.74025	0.0615505																527.357	0.81094	0.145911	529.561	0.968736	0.149736	nan	nan	nan
558.232	0.694343	0.0937495	555.499	0.55703	0.084086	558.442	0.717663	0.0607269																555.591	0.891349	0.15786	557.96	0.964669	0.150916	20.3655	0.560797	0.119794
nan	nan	nan	nan	nan	nan	nan	nan	nan																nan	nan	nan	nan	nan	nan	48.6565	0.56084	0.117163
17.6865	0.672988	0.0972702	20.32	0.648647	0.101448	20.629	0.517172	0.0915613																20.327	0.338154	0.0677379	18.342	0.364986	0.0678747	76.9895	0.705157	0.131175
45.947	0.543334	0.0839492	48.591	0.508904	0.083779	48.95	0.609972	0.0910523																48.63	1.08587	0.138133	46.653	0.782986	0.109799	105.306	0.711301	0.13009
74.228	0.617344	0.087419	77.021	0.681198	0.0919744	77.431	0.58379	0.084372																76.9615	0.887865	0.123314	74.973	0.921779	0.119181	133.543	0.867863	0.144894
102.609	0.594194	0.0841391	105.451	0.624269	0.0850612	105.673	0.628009	0.0840279																105.306	0.917143	0.122746	103.294	0.979374	0.120738	161.781	0.578057	0.118213
130.902	0.723311	0.0927324	133.911	0.634551	0.083426	133.893	0.747175	0.0881705																133.596	0.653966	0.10228	131.609	0.792023	0.106949	190.087	0.5726	0.119621
159.149	0.538264	0.0794634	162.431	0.539174	0.0755922	162.153	0.53972	0.073535																161.84	0.851291	0.116018	159.91	0.705917	0.0999702	218.412	0.487099	0.111981
187.364	0.607398	0.0835381	190.751	0.54258	0.0746196	190.375	0.646952	0.0791351																190.143	0.798782	0.112016	188.15	0.662418	0.0967568	246.851	0.727419	0.140251
215.626	0.793233	0.0956225	219.071	0.677303	0.08285	218.786	0.571996	0.0739327																218.407	0.730631	0.106727	216.402	0.733278	0.100863	275.277	0.554471	0.124239
243.946	0.758807	0.0935265	247.411	0.586809	0.0764889	247.093	0.486978	0.0676109																246.77	0.694591	0.104865	244.643	0.848789	0.108833	303.683	0.599146	0.131011
272.417	0.736213	0.0928764	275.691	0.73541	0.0850272	275.437	0.750493	0.0834956																275.2	0.989175	0.124819	272.943	0.732361	0.100737	332.178	0.659482	0.140887
300.803	0.869744	0.101247	304.011	0.622797	0.0785614	303.725	0.636246	0.0772502																303.576	0.851242	0.116012	301.269	0.882435	0.111339	360.403	0.548011	0.129454
329.067	0.660474	0.0891738	332.252	0.709967	0.0837769	332.005	0.764204	0.0850221																331.979	0.724088	0.106915	329.54	0.708344	0.100314	388.642	0.714741	0.1527
357.358	0.640868	0.0889882	360.571	0.617928	0.0779468	360.285	0.646369	0.07848																360.23	0.682399	0.10545	357.841	0.657836	0.097127	416.908	0.715598	0.156491
385.687	0.801696	0.10035	389.041	0.557831	0.0746332	388.536	0.767035	0.0858692																388.529	0.752005	0.11104	386.226	0.932846	0.115879	445.259	0.98738	0.18698
413.924	0.695317	0.094747	417.451	0.692949	0.083527	416.795	0.617371	0.0778765																416.842	0.861541	0.120823	414.651	0.607349	0.0949852	473.532	0.623963	0.151694
442.18	0.757082	0.100415	445.884	0.756998	0.0881145	445.189	0.707344	0.0840532																445.111	0.776288	0.115896	442.873	0.731913	0.104708	501.933	0.567794	0.14698
470.42	0.642922	0.0949227	474.254	0.539785	0.0749461	473.577	0.644873	0.0807092																473.341	0.709804	0.1124	471.102	0.852964	0.11415	530.17	0.286726	0.10887
498.74	0.778533	0.108117	502.557	0.542479	0.0753203	501.886	0.598188	0.0786426																501.579	0.880875	0.127343	499.382	0.712356	0.105182	558.39	0.600836	0.161019
527.048	0.651484	0.101891	530.809	0.696527	0.0858464	530.299	0.625113	0.0814845																529.92	0.832979	0.125773	527.723	0.632379	0.100132	nan	nan	nan
555.305	0.778989	0.116298	559.078	0.514715	0.0743843	558.631	0.684911	0.0857234																558.236	0.97547	0.139582	556.073	0.686937	0.106152	17.67	0.315433	0.0706633
nan	nan	nan	nan	nan	nan	nan	nan	nan																nan	nan	nan	nan	nan	nan	45.9415	0.627758	0.0926836
20.6135	0.617778	0.131972	19.8475	0.838097	0.1311	19.548	0.529987	0.0673857																20.8	0.416185	0.0694557	19.261	0.550524	0.104211	74.172	0.72167	0.0965679
49.019	0.541266	0.113071	48.102	0.682065	0.113855	47.868	0.658369	0.0683513																49.06	0.688849	0.101709	47.57	0.768479	0.134003	102.413	0.790705	0.0997569
77.281	0.333979	0.0836804	76.409	0.735679	0.115068	76.187	0.683046	0.0652052																77.38	0.801164	0.107213	75.91	0.714122	0.128479	130.661	0.483668	0.0775514
105.536	0.566627	0.105391	104.656	0.73637	0.112463	104.58	0.573388	0.0571179																105.7	0.669008	0.0957031	104.232	0.572555	0.112484	159.067	0.590396	0.0853274
133.758	0.614183	0.108745	132.903	0.454707	0.0876488	132.966	0.655112	0.0591405																134	0.868559	0.107887	132.613	0.769897	0.128526	187.441	0.708548	0.0931607
162.012	0.623982	0.108791	161.285	0.668017	0.104479	161.306	0.672731	0.0584049																162.42	0.868107	0.106208	160.944	0.758037	0.126545	215.848	0.675271	0.0911737
190.333	0.544864	0.101341	189.677	0.468691	0.0871684	189.607	0.65038	0.0566767																190.7	0.824294	0.103182	189.274	0.995552	0.143935	244.254	0.542956	0.0819605
218.738	0.660276	0.11178	218.006	0.538654	0.0925144	217.888	0.685594	0.0576059																219.04	0.6644	0.0922586	217.593	0.778832	0.126546	272.503	0.703895	0.0941879
247.118	0.661209	0.111938	246.49	0.636443	0.100776	246.231	0.591874	0.0532128																247.48	0.729726	0.0967858	245.884	1.01372	0.145059	300.748	0.576832	0.0851608
275.579	0.785901	0.122928	274.89	0.564215	0.0941724	274.479	0.779876	0.0613569																275.76	0.60384	0.088196	274.233	0.641391	0.115386	329.067	0.544319	0.0831173
304.071	0.672004	0.11543	303.197	0.496581	0.0879141	302.717	0.559339	0.0515485																303.98	0.83811	0.10331	302.463	0.920278	0.138965	357.417	0.721333	0.0965228
332.327	0.6958	0.11952	331.522	0.77192	0.110435	330.99	0.64698	0.0557505																332.24	0.942336	0.110456	330.704	0.847159	0.132518	385.675	0.589746	0.0880315
360.569	0.735578	0.126357	359.745	0.786181	0.111345	359.298	0.665095	0.0566863																360.55	0.775381	0.10024	359.044	0.86052	0.13461	413.93	0.708037	0.0973891
388.83	0.696226	0.12733	387.986	0.628188	0.0994681	387.602	0.739595	0.0602666																388.87	0.578527	0.0873329	387.519	0.642793	0.117554	442.243	0.545564	0.0853177
417.115	0.750525	0.135031	416.305	0.765659	0.110675	415.853	0.743778	0.0610129																417.13	0.664932	0.0941628	415.899	0.735866	0.126408	470.497	0.605731	0.0914418
445.361	0.673518	0.13233	444.547	0.740107	0.109282	444.08	0.659096	0.0581005																445.477	0.93416	0.113452	444.312	0.670748	0.120671	498.817	0.685898	0.0981205
473.65	0.668329	0.136684	472.866	0.665073	0.104018	472.309	0.748275	0.0624382																473.758	0.66479	0.0960857	472.546	0.93162	0.143994	527.055	0.824454	0.108412
501.999	0.489807	0.122741	501.121	0.857647	0.119113	500.567	0.657202	0.0590896																501.999	0.663563	0.0969243	500.781	0.740619	0.129142	555.443	0.361357	0.0723873
530.326	1.19491	0.202386	529.521	0.799274	0.115537	528.814	0.670313	0.0605136																530.243	0.876822	0.113364	529.148	0.665175	0.123733	nan	nan	nan
558.713	0.754955	0.16919	557.926	0.869769	0.121978	557.191	0.716835	0.0634399																558.486	0.895237	0.116724	557.466	0.749246	0.132676	19.841	0.656593	0.077475
nan	nan	nan	nan	nan	nan	nan	nan	nan																nan	nan	nan	nan	nan	nan	48.132	0.764523	0.081144
19.862	0.566049	0.0566672	18.886	0.596417	0.102441	19.365	0.72095	0.105312																			20.3805	0.625186	0.0894307	76.5495	0.667392	0.0742448
48.186	0.578387	0.0533045	47.285	0.577622	0.0950976	47.605	0.564323	0.0842346																			48.622	0.817217	0.102295	104.871	0.506292	0.0638584
76.457	0.561709	0.0500967	75.6715	0.511253	0.0853284	76.024	0.549623	0.0778253																			77.042	0.739257	0.0980508	133.095	0.605655	0.0695546
104.742	0.742498	0.0558853	103.9	0.578692	0.0883688	104.394	0.754672	0.0866796																			105.442	0.983877	0.114547	161.375	0.452203	0.0599619
132.983	0.711176	0.0533758	132.161	0.441295	0.0757863	132.682	0.589163	0.0743163																			133.762	0.780612	0.104461	189.722	0.647733	0.0720565
161.402	0.581949	0.0475713	160.427	0.57939	0.0855387	161.043	0.585723	0.0721827																			162.064	0.63685	0.0972551	217.981	0.624621	0.070808
189.711	0.661925	0.0503895	188.711	0.478405	0.0767071	189.303	0.635991	0.0745267																			190.447	0.913538	0.121185	246.212	0.669504	0.0735769
218.119	0.607127	0.047906	216.966	0.683028	0.0905882	217.587	0.582121	0.0706752																			218.707	0.902031	0.125283	274.452	0.664465	0.0734667
246.518	0.695304	0.0509135	245.288	0.735646	0.0935517	245.855	0.522389	0.0664192																			247.027	1.00291	0.137985	302.852	0.595171	0.0697407
274.903	0.652286	0.0495125	273.527	0.591123	0.0837048	274.166	0.799829	0.0817401																			275.272	0.753764	0.124117	331.112	0.664337	0.0743652
303.244	0.673245	0.050246	301.817	0.521795	0.0778836	302.428	0.753472	0.0790866																			303.593	0.868224	0.141083	359.392	0.514258	0.065919
331.466	0.668614	0.050321	330.068	0.601022	0.0834531	330.821	0.706447	0.0767203																			331.913	0.913569	0.152531	387.785	0.534581	0.0674282
359.74	0.616185	0.0484709	358.409	0.683306	0.0890748	359.221	0.669748	0.0749713																			360.213	0.761434	0.149617	416.071	0.574292	0.0707732
388.027	0.607234	0.0483669	386.797	0.645767	0.0864053	387.533	0.724315	0.0782033																			388.613	0.868043	0.170581	444.292	0.587592	0.0718704
416.365	0.616728	0.0489689	415.29	0.683206	0.0890617	415.943	0.547312	0.068493																			416.933	0.76056	0.170449	472.533	0.671537	0.0776378
444.593	0.724008	0.0534469	443.751	0.827248	0.098312	444.244	0.682245	0.0768531																			445.193	0.665275	0.172229	500.783	0.600479	0.0745695
472.839	0.625397	0.0499727	472.169	0.743208	0.0930246	472.494	0.739099	0.0802687																			473.527	0.771511	0.199751	529.172	0.403329	0.0615804
501.087	0.628483	0.050706	500.549	0.721307	0.091727	500.835	0.682105	0.0778291																			501.868	0.699292	0.20251	557.506	0.599447	0.076222
529.382	0.667855	0.0528649	528.79	0.706303	0.0913034	529.126	0.795506	0.0849134																			530.232	0.985151	0.255114	nan	nan	nan
557.808	0.783111	0.0581295	557.095	0.653729	0.0882634	557.363	0.684508	0.0796715																			558.472	0.661129	0.221252	18.79	0.503278	0.0920276
nan	nan	nan	nan	nan	nan	nan	nan	nan																			nan	nan	nan	47.022	0.681851	0.100675
17.581	0.544705	0.0559461	19.9065	0.777202	0.133514	19.288	0.636611	0.085951																			20	0.845987	0.0743007	75.2765	0.569277	0.0901352
45.818	0.559094	0.0536102	48.319	0.528376	0.101856	47.61	0.613169	0.0799267																			48.4	0.804028	0.070076	103.509	0.619662	0.0924995
74.161	0.570962	0.0519635	76.7075	0.497596	0.0925466	76.072	0.645523	0.0795565																			76.66	0.753767	0.0659426	131.922	0.73203	0.099754
102.46	0.699251	0.0564191	105.115	0.651915	0.101959	104.459	0.647178	0.0774472																			104.978	0.797845	0.0661201	160.414	0.629527	0.0919498
130.869	0.605923	0.052018	133.448	0.453195	0.082866	132.88	0.615825	0.0742253																			133.298	0.78734	0.0652489	188.798	0.714216	0.0973249
159.261	0.621483	0.0525871	161.756	0.620483	0.094754	161.127	0.641679	0.0746836																			161.539	0.772425	0.0644548	217.024	0.587296	0.0886573
187.685	0.68117	0.0553195	189.988	0.698911	0.0989775	189.433	0.734969	0.0793544																			189.759	0.751741	0.0633912	245.345	0.373823	0.0707515
215.989	0.62337	0.0533211	218.232	0.582755	0.0889896	217.715	0.721837	0.0779356																			218.079	0.672175	0.0599553	273.606	0.725879	0.0998448
244.218	0.622282	0.0542263	246.483	0.577931	0.0882526	245.992	0.646953	0.073341																			246.419	0.858093	0.0679359	301.824	0.801955	0.105451
272.472	0.760349	0.0609578	274.724	0.569652	0.0869876	274.221	0.672812	0.0743902																			274.819	0.865187	0.068498	330.072	0.756544	0.103097
300.722	0.711119	0.0601765	303.03	0.576476	0.0870231	302.469	0.680444	0.0747798																			303.219	0.679345	0.0613296	358.416	0.49908	0.0844792
329.109	0.559197	0.0546319	331.394	0.651291	0.0922298	330.694	0.723017	0.0771707																			331.439	0.869343	0.0699281	386.627	0.586106	0.0928013
357.421	0.675885	0.0617741	359.755	0.637326	0.0911681	359.09	0.765353	0.0794659																			359.74	0.675477	0.0619963	414.872	0.753621	0.106731
385.668	0.774699	0.0682975	388.15	0.703974	0.0959284	387.348	0.625638	0.0718508																			388.22	0.793986	0.0681753	443.207	0.485188	0.087273
414.08	0.81048	0.0720145	416.561	0.731932	0.0988291	415.591	0.627824	0.0716321																			416.473	0.765555	0.0674916	471.607	0.475914	0.0885122
442.459	0.746575	0.0715993	444.966	0.760616	0.100885	443.867	0.716783	0.0769434																			444.739	0.743103	0.0673637	499.911	0.575802	0.0988979
470.881	0.676439	0.0706084	473.351	0.70106	0.0973524	472.152	0.598166	0.0705772																			472.979	0.715609	0.0668144	528.158	0.567815	0.100532
499.187	0.717397	0.0752969	501.579	0.810852	0.105714	500.389	0.714821	0.0776303																			501.279	0.814995	0.0721336	556.451	0.627348	0.107756
527.43	0.740818	0.0795243	529.822	0.630159	0.0940673	528.677	0.847731	0.0844675																			529.679	0.856538	0.0749405	nan	nan	nan
555.711	0.743918	0.0832787	558.132	0.568662	0.0900378	557.032	0.711635	0.0777428																			558.02	0.791604	0.0739149	20.627	0.605401	0.105551
nan	nan	nan	nan	nan	nan	nan	nan	nan																			nan	nan	nan	48.859	0.632434	0.104127
19.92	0.638987	0.0895933	19.9345	0.801308	0.0870298	20.14	0.535232	0.0485106																			17.407	0.782479	0.0844877	77.1795	0.682317	0.106717
48.32	0.633109	0.083963	48.215	0.663892	0.0767536	48.48	0.706988	0.0519091																			45.789	0.821961	0.0848927	105.564	0.537392	0.0936877
76.64	0.635313	0.0801403	76.4635	0.641772	0.0737049	76.78	0.558978	0.043969																			74.129	0.700747	0.0765527	133.94	0.74813	0.109285
104.929	0.730812	0.0833895	104.715	0.66381	0.0738462	105.02	0.640755	0.0458284																			102.389	0.739335	0.0780318	162.301	0.540492	0.0928302
133.19	0.743216	0.0821788	133.115	0.63281	0.0717369	133.26	0.675607	0.0461401																			130.629	0.694214	0.0758386	190.539	0.796717	0.112838
161.48	0.664715	0.0763405	161.506	0.653026	0.0730985	161.77	0.73318	0.0476963																			158.869	0.834805	0.0840146	218.8	0.490893	0.0882998
189.909	0.690686	0.076837	189.841	0.656775	0.0735184	190.071	0.669589	0.0452067																			187.087	0.694128	0.077221	247.079	0.755226	0.110322
218.299	0.667354	0.075174	218.224	0.785255	0.0810991	218.31	0.63805	0.0438806																			215.329	0.796523	0.084072	275.341	0.579606	0.0967426
246.519	0.76806	0.0801785	246.458	0.766554	0.0809066	246.551	0.61613	0.0431943																			243.789	0.930771	0.0927486	303.58	0.587746	0.098102
274.788	0.720172	0.0777549	274.714	0.663773	0.076233	274.885	0.655219	0.0445404																			272.309	0.769886	0.0861887	331.821	0.703853	0.107494
303.029	0.726925	0.0784845	302.964	0.773147	0.0834795	303.18	0.661011	0.0450381																			300.529	0.750363	0.0867574	360.128	0.777858	0.11363
331.291	0.679397	0.0760515	331.274	0.686953	0.0799563	331.431	0.635894	0.0445807																			328.87	0.858644	0.094953	388.441	0.610171	0.101847
359.67	0.734039	0.0797179	359.675	0.692982	0.0812093	359.808	0.644846	0.0453197																			357.19	0.928684	0.100876	416.853	0.55639	0.0985079
387.89	0.748271	0.0812646	388.006	0.817578	0.0904084	388.079	0.62961	0.0454971																			385.43	0.75598	0.0938935	445.096	0.512769	0.0953699
416.14	0.820402	0.086116	416.324	0.689996	0.085041	416.326	0.633224	0.0461199																			413.67	0.842499	0.101567	473.332	0.476122	0.0935306
444.39	0.76925	0.0830574	444.555	0.675484	0.0858965	444.553	0.706765	0.0494315																			441.901	0.912066	0.109961	501.625	0.755264	0.119603
472.692	0.657453	0.0781205	472.857	0.775607	0.0941828	472.863	0.635008	0.0476564																			470.29	0.732184	0.10267	529.875	0.503601	0.0989311
501.011	0.632173	0.0773257	501.094	0.589821	0.0843692	501.272	0.673403	0.0498449																			498.797	0.764327	0.110482	558.209	0.599682	0.109665
529.457	0.755965	0.0862615	529.351	0.766399	0.0990775	529.514	0.71816	0.0524489																			527.277	0.915444	0.124769	nan	nan	nan
557.881	0.708421	0.0847798	557.678	0.892301	0.109995	557.769	0.765102	0.0551515																			555.659	0.812145	0.122625	20.336	0.659538	0.0874709
nan	nan	nan	nan	nan	nan	nan	nan	nan																			nan	nan	nan	48.567	0.651729	0.0849559
18.801	0.721594	0.0676676	20.9805	0.795737	0.13876	20.051	0.58824	0.0898276																			20.3425	0.775132	0.0921142	76.813	0.638803	0.0825727
47.1975	0.538183	0.0549873	49.2975	0.538651	0.110151	48.295	0.521957	0.0787891																			48.629	0.720804	0.0875238	105.126	0.71541	0.0868682
75.6025	0.635656	0.0576173	77.6	0.67657	0.121719	76.535	0.532044	0.0761006																			76.958	0.782258	0.0898505	133.602	0.64102	0.0815113
103.853	0.735607	0.060545	105.842	0.602701	0.116192	104.935	0.44291	0.067626																			105.278	0.72641	0.086935	161.93	0.664883	0.0832152
132.096	0.639502	0.0557277	134.083	0.574272	0.117439	133.275	0.617445	0.0772746																			133.599	0.586169	0.0784267	190.235	0.618964	0.0800069
160.339	0.670062	0.0564987	162.344	0.771483	0.141105	161.582	0.713282	0.0813888																			161.899	0.889539	0.0971938	218.478	0.639427	0.0813086
188.66	0.634074	0.0548407	190.588	0.693459	0.141828	189.832	0.617656	0.0749919																			190.219	0.707609	0.0878819	246.717	0.629992	0.0807625
217.044	0.692968	0.0574225	219.049	0.669592	0.15005	218.057	0.572664	0.0716672																			218.439	0.762453	0.0925844	274.966	0.728136	0.0871416
245.353	0.63204	0.0550771	247.45	0.800329	0.179369	246.298	0.843313	0.0866398																			246.699	0.792796	0.0955712	303.217	0.703258	0.0866765
273.673	0.759371	0.0606853	275.836	0.928098	0.213448	274.536	0.87021	0.0875804																			274.939	0.819783	0.0988267	331.517	0.737916	0.0889508
301.918	0.758453	0.0611991	304.08	0.621932	0.197381	302.793	0.611357	0.0736865																			303.179	0.876987	0.103501	359.967	0.619706	0.0821852
330.321	0.601154	0.0551706	332.348	0.488244	0.200419	331.108	0.623444	0.0746053																			331.399	0.868655	0.103972	388.338	0.742725	0.0901871
358.703	0.789357	0.0639021	360.709	0.964327	0.322808	359.452	0.739873	0.0813154																			359.64	0.676814	0.0939835	416.64	0.597473	0.081408
386.954	0.725849	0.0620924	389.096	0.538569	0.271456	387.799	0.642514	0.0768887																			388.062	0.70148	0.0974109	445.045	0.520011	0.0759462
415.198	0.746615	0.0641043	417.379	0.801787	0.361002	416.219	0.799823	0.0868683																			416.468	0.932094	0.114043	473.423	0.64223	0.0851741
443.482	0.562576	0.0566032	445.6	1.36369	0.518295	444.519	0.810601	0.0885623																			444.688	0.694192	0.101401	501.679	0.630806	0.0851667
471.764	0.751824	0.0667993	474	0.900291	0.453923	472.758	0.698749	0.0836225																			473.008	0.565519	0.0931042	529.93	0.57496	0.0822421
500.075	0.629477	0.0617968	502.26	0.804456	0.469492	501.07	0.756064	0.0892202																			501.308	0.854261	0.118643	558.191	0.5888	0.0842229
528.321	0.768092	0.069066	530.556	0.932129	0.544066	529.324	0.74164	0.0900552																			529.638	0.932079	0.127038	nan	nan	nan
556.552	0.786249	0.0709866	558.899	1.91493	0.863057	557.658	0.612624	0.0842579																			557.878	0.703727	0.114336	18.54	0.505112	0.0973692
nan	nan	nan	nan	nan	nan	nan	nan	nan																			nan	nan	nan	46.795	0.62548	0.105887
19.441	0.537903	0.0713308	20.082	0.470196	0.0570807	20.301	0.694974	0.0913749																			19.141	0.73891	0.114188	75.1215	0.572567	0.0998233
47.672	0.720493	0.078246	48.342	0.578516	0.0600567	48.589	0.746895	0.0887562																			47.447	0.780522	0.11402	103.427	0.636829	0.104851
75.933	0.661581	0.0722708	76.662	0.570279	0.0579676	76.869	0.487866	0.0683956																			75.847	0.722479	0.107858	131.665	0.650124	0.105621
104.163	0.51429	0.0619812	105.122	0.699832	0.0626729	105.089	0.603155	0.0743321																			104.102	0.768509	0.109947	160.008	0.807223	0.117923
132.376	0.743748	0.0730225	133.514	0.666449	0.0604106	133.349	0.6497	0.0756177																			132.415	0.762819	0.109132	188.444	0.599159	0.102912
160.644	0.646005	0.0674298	161.78	0.600063	0.0570207	161.589	0.597327	0.0714783																			160.637	0.846711	0.115394	216.747	0.484743	0.0934411
188.944	0.58828	0.0635075	190.1	0.659389	0.0592864	189.969	0.638984	0.0738721																			188.897	0.83751	0.114139	245.164	0.513129	0.0971295
217.363	0.747556	0.0713669	218.47	0.620534	0.0571915	218.209	0.603029	0.0716507																			217.137	0.71637	0.105775	273.423	0.652009	0.111995
245.588	0.686242	0.0683662	246.781	0.664856	0.0590682	246.449	0.71215	0.0782665																			245.377	0.757648	0.109516	301.674	0.566226	0.105317
273.829	0.65711	0.0671454	275.021	0.59039	0.0556023	274.749	0.62945	0.0737597																			273.697	0.721943	0.106598	329.915	0.642983	0.113848
302.073	0.644101	0.0665119	303.261	0.619037	0.0570534	303.109	0.664528	0.0763198																			302.075	0.575906	0.0961248	358.245	0.581515	0.110081
330.314	0.676812	0.0688023	331.511	0.635488	0.05784	331.329	0.568186	0.0711066																			330.335	1.07565	0.133635	386.55	0.63842	0.118753
358.536	0.685846	0.0700835	359.981	0.67557	0.0597858	359.581	0.772666	0.0834273																			358.577	0.786592	0.114907	414.856	0.752862	0.131278
386.781	0.705536	0.0717242	388.401	0.691095	0.0606885	387.904	0.627469	0.0767506																			386.837	0.745726	0.113893	443.257	0.629032	0.123586
415.124	0.702297	0.0725252	416.781	0.836971	0.0673221	416.228	0.657225	0.079799																			415.117	0.784112	0.11976	471.664	0.538553	0.117755
443.493	0.61362	0.0686844	445.13	0.699129	0.061872	444.468	0.793217	0.0893628																			443.377	0.882187	0.128883	500.067	0.550243	0.123291
471.742	0.681083	0.0739634	473.44	0.722813	0.0637211	472.828	0.646376	0.0821927																			471.697	0.718027	0.119862	528.298	0.438876	0.113595
500.025	0.556672	0.0680861	501.72	0.733844	0.0644449	501.158	0.804706	0.0936718																			499.917	0.695805	0.121323	556.538	0.606403	0.139423
528.332	0.636886	0.0746311	529.98	0.751977	0.0662938	529.418	0.70602	0.0905152																			528.237	0.936123	0.144691	nan	nan	nan
556.62	0.683113	0.0789763	558.221	0.696316	0.0641804	557.638	0.731995	0.0946269																			556.657	0.860684	0.143694	19.839	0.478528	0.13855
nan	nan	nan	nan	nan	nan	nan	nan	nan																			nan	nan	nan	48.15	0.67441	0.159331
17.83	0.555205	0.0711698	20.561	0.722297	0.0949698	19.596	0.559524	0.0384774																						76.508	0.772661	0.165083
46.072	0.776384	0.0797581	48.781	0.461691	0.0713302	47.877	0.547599	0.0344064																						104.834	0.438593	0.121978
74.464	0.688384	0.0722499	77.041	0.681469	0.0827445	76.157	0.627867	0.0346721																						133.196	0.530438	0.132929
102.784	0.878572	0.0796529	105.352	0.600891	0.0752019	104.397	0.613012	0.0329633																						161.482	0.774067	0.158325
131.024	0.641621	0.067339	133.752	0.686972	0.0788992	132.638	0.613985	0.0321928																						189.723	0.54439	0.132339
159.304	0.705954	0.0696451	162.073	0.659795	0.075776	160.978	0.581216	0.0308558																						217.965	0.382572	0.110758
187.591	0.706803	0.0693929	190.313	0.612396	0.0722572	189.378	0.646831	0.0323208																						246.222	0.544959	0.132478
215.843	0.70112	0.0691679	218.682	0.770759	0.0800277	217.696	0.650835	0.0323211																						274.536	0.751563	0.157034
244.094	0.656569	0.0667434	246.962	0.658208	0.073679	246.017	0.684149	0.0331344																						302.943	0.433738	0.120628
272.381	0.716245	0.0699848	275.342	0.631619	0.0720654	274.378	0.656862	0.0325409																						331.389	0.800397	0.167245
300.702	0.661451	0.067944	303.603	0.705387	0.0757194	302.732	0.647513	0.0325168																						359.969	0.391581	0.118435
329.111	0.74735	0.0730261	331.85	0.77992	0.0801226	331.057	0.687521	0.0337331																						388.228	0.666359	0.157428
357.352	0.633247	0.0679705	360.242	0.698649	0.0763234	359.285	0.591462	0.0315776																						416.543	0.810206	0.177195
385.601	0.757677	0.0751167	388.632	0.61748	0.0718657	387.526	0.651101	0.0335049																						444.764	0.328034	0.116452
413.873	0.653633	0.0709808	417.012	0.692949	0.0770898	415.926	0.640539	0.0335401																						473.016	0.649095	0.168038
442.162	0.651673	0.0720509	445.252	0.528681	0.0683314	444.254	0.631031	0.0337392																						501.244	0.358888	0.127408
470.482	0.632233	0.0726081	473.512	0.717694	0.0798444	472.565	0.699056	0.0360692																						529.505	0.62995	0.175227
498.724	0.819358	0.0846227	501.779	0.676214	0.0787056	500.806	0.642561	0.0350093																						557.731	0.202535	0.102053
527.044	0.73982	0.0844181	530.136	0.735685	0.0834068	529.087	0.717882	0.0375414																						nan	nan	nan
555.436	0.713079	0.0872282	558.381	0.630161	0.078867	557.367	0.687172	0.0372766																						19.56	0.634783	0.0958082
nan	nan	nan	nan	nan	nan	nan	nan	nan																						47.8	0.614099	0.090646
19.66	0.593688	0.110427	20.1005	0.789843	0.0868113	17.129	0.655198	0.0477213																						76.0255	0.398234	0.0716036
47.94	0.719583	0.113948	48.434	0.632257	0.0735865	45.345	0.613938	0.0436872																						104.363	0.592886	0.0865766
76.152	0.586338	0.0978661	76.914	0.698678	0.0749988	73.5995	0.638608	0.0427276																						132.66	0.501317	0.0783759
104.413	0.811705	0.110618	105.295	0.539277	0.0645286	101.909	0.585768	0.0399088																						160.971	0.572127	0.0826684
132.719	0.846379	0.109424	133.538	0.688951	0.0723102	130.3	0.573513	0.0389833																						189.31	0.641416	0.0873827
161.194	0.747894	0.100985	161.834	0.694734	0.0721291	158.552	0.732583	0.0436948																						217.531	0.422704	0.0705243
189.625	0.714746	0.0973963	190.095	0.582976	0.0660847	186.808	0.548398	0.0376234																						245.774	0.688798	0.0897759
218.016	0.6358	0.090949	218.352	0.666055	0.0706868	215.262	0.557633	0.0379909																						274.024	0.563791	0.0814633
246.344	0.654202	0.0917279	246.657	0.579489	0.0661144	243.526	0.676259	0.0418423																						302.273	0.474735	0.0751409
274.648	0.549094	0.0838462	274.898	0.666124	0.0715023	271.782	0.728306	0.0435942																						330.583	0.62696	0.0854121
302.902	0.752349	0.0980803	303.295	0.704466	0.0743492	300.082	0.742026	0.0442584																						358.823	0.656887	0.0878784
331.216	0.764625	0.0996816	331.692	0.674445	0.0732428	328.318	0.740457	0.044561																						387.163	0.565849	0.0817608
359.449	0.553848	0.0855747	359.914	0.779335	0.0796444	356.639	0.617355	0.0411218																						415.45	0.676394	0.0896921
387.698	0.740896	0.100039	388.234	0.716914	0.0774038	384.887	0.726709	0.0450518																						443.745	0.625427	0.0868269
415.937	0.875445	0.109588	416.534	0.883259	0.0871517	413.175	0.696438	0.0445597																						472.041	0.571301	0.083423
444.278	0.68337	0.0987718	444.801	0.672088	0.0771887	441.441	0.678133	0.0444897																						500.344	0.647156	0.0889933
472.66	0.797745	0.108714	473.044	0.811022	0.0865709	469.68	0.629588	0.0434007																						528.607	0.614114	0.0878279
501.041	0.792953	0.111196	501.295	0.714363	0.0831487	498.109	0.639308	0.0443875																						556.905	0.645385	0.0904739
529.442	0.654071	0.103568	529.595	0.638979	0.0806039	526.465	0.673204	0.0460831																						nan	nan	nan
557.678	0.713409	0.111582	558.056	0.614019	0.0821551	554.851	0.68851	0.0472419
nan	nan	nan	nan	nan	nan	nan	nan	nan
20.563	0.591871	0.0604756				20.641	0.547911	0.056878
48.804	0.773867	0.0652576				48.981	0.651869	0.0568065
77.093	0.618439	0.0558276				77.341	0.63227	0.0527528
105.451	0.586279	0.0531393				105.581	0.55799	0.047553
133.774	0.712779	0.057699				133.909	0.587395	0.0473897
162.162	0.601193	0.0525871				162.3	0.612033	0.0475613
190.404	0.67712	0.0555411				190.535	0.594542	0.0463411
218.643	0.686559	0.0561278				218.781	0.654225	0.0481623
246.926	0.671304	0.0558177				247.212	0.628329	0.0470231
275.323	0.674895	0.0563109				275.497	0.680708	0.0486877
303.611	0.684665	0.0573259				303.726	0.710616	0.049701
331.923	0.772953	0.0617715				331.998	0.665747	0.0482357
360.154	0.570109	0.0541724				360.293	0.675435	0.048684
388.475	0.671662	0.059909				388.543	0.628029	0.0470006
416.854	0.65184	0.0603341				416.86	0.556069	0.0444307
445.254	0.794002	0.0681759				445.249	0.647914	0.0482212
473.526	0.755271	0.0681879				473.507	0.63715	0.048088
501.826	0.74729	0.0703883				501.726	0.66711	0.0493789
530.216	0.701317	0.0702175				530.047	0.649768	0.0489023
558.528	0.63957	0.069865				558.294	0.706671	0.0514727
nan	nan	nan				nan	nan	nan
19.342	0.567405	0.0527408				18.5755	0.620496	0.0473715
47.6475	0.620295	0.0521158				46.9205	0.521194	0.0412508
76.071	0.561442	0.0478471				75.373	0.567342	0.0415392
104.48	0.680632	0.0513713				103.682	0.639081	0.0429512
132.862	0.697614	0.0513581				131.995	0.630837	0.0417446
161.1	0.690595	0.0507043				160.243	0.630786	0.0411182
189.332	0.619483	0.047853				188.486	0.641414	0.041121
217.622	0.606779	0.0472951				216.707	0.73044	0.043722
245.99	0.649294	0.0492853				245.13	0.732128	0.0436677
274.2	0.664556	0.0500154				273.543	0.63911	0.040724
302.452	0.626458	0.0489783				301.966	0.62843	0.0404541
330.693	0.724369	0.0533291				330.478	0.655552	0.0416043
359.01	0.701396	0.0530904				358.719	0.652805	0.0416815
387.431	0.701076	0.0539994				387.044	0.666683	0.0423963
415.732	0.744129	0.0566515				415.374	0.693095	0.0436398
444.041	0.756972	0.0579658				443.678	0.676592	0.0436465
472.323	0.861957	0.0636383				471.92	0.689552	0.0446686
500.614	0.721277	0.0595663				500.17	0.738402	0.047055
528.952	0.758942	0.0628932				528.562	0.757203	0.048649
557.254	0.70926	0.0625248				556.92	0.764559	0.0500566
nan	nan	nan				nan	nan	nan
19.1425	0.570097	0.0979168				20.059	0.639073	0.0729164
47.429	0.752795	0.105561				48.3095	0.647384	0.0715771
75.774	0.669753	0.0958088				76.6085	0.640541	0.0699718
103.999	0.798596	0.100752				104.93	0.627596	0.0681523
132.269	0.565609	0.0835025				133.18	0.715048	0.0715938
160.573	0.578517	0.0836091				161.481	0.673201	0.0684358
188.959	0.666723	0.0892102				189.735	0.682825	0.0687099
217.214	0.644779	0.0870537				217.958	0.657473	0.0671832
245.469	0.719909	0.0922963				246.305	0.738534	0.0711556
273.784	0.619179	0.0859751				274.611	0.847525	0.0762149
302.1	0.615201	0.0862565				302.931	0.598207	0.0645803
330.335	0.559554	0.0835218				331.264	0.727613	0.071784
358.561	0.662047	0.0919309				359.651	0.709104	0.0717192
386.822	0.720059	0.0972241				387.901	0.644529	0.0691829
415.119	0.794166	0.105338				416.132	0.724953	0.074472
443.513	0.789584	0.106618				444.443	0.753035	0.0773587
471.928	0.661343	0.0998411				472.687	0.716251	0.0768864
500.337	0.721527	0.107714				500.94	0.719554	0.0786086
528.742	0.606869	0.102734				529.274	0.789823	0.0843064
557.143	0.613414	0.106948				557.578	0.837088	0.0888518
nan	nan	nan				nan	nan	nan
20.3565	0.476861	0.088688				19.8515	0.620592	0.0381785
48.588	0.773972	0.105473				48.147	0.622695	0.0374027
76.908	0.69943	0.095308				76.5555	0.503865	0.0331941
105.208	0.628414	0.0864303				104.805	0.667147	0.0379529
133.608	0.516097	0.0761895				133.023	0.681581	0.0383448
161.868	0.697629	0.0866408				161.275	0.660657	0.0378279
190.148	0.767344	0.0899288				189.513	0.68757	0.0389901
218.556	0.568495	0.0760603				217.767	0.692943	0.0395489
246.816	0.8088	0.0905474				246.087	0.667174	0.039307
275.036	0.572704	0.0759481				274.492	0.688793	0.0406518
303.356	0.742082	0.0869663				302.775	0.758788	0.0434506
331.595	0.576683	0.0764761				331.024	0.756825	0.0443632
359.916	0.673498	0.0823836				359.279	0.678223	0.042958
388.256	0.742649	0.0870328				387.606	0.657593	0.0434215
416.656	0.65692	0.0822173				416.077	0.682649	0.0453736
444.876	0.779555	0.090134				444.401	0.829604	0.0514356
473.176	0.613388	0.0806415				472.65	0.706886	0.0488484
501.547	0.578836	0.0788668				500.944	0.689064	0.049539
529.827	0.704061	0.0874401				529.214	0.649938	0.049477
558.087	0.763588	0.0920467				557.516	0.820315	0.0572399
nan	nan	nan				nan	nan	nan
18.321	0.532365	0.0864801				20.14	0.600398	0.0450576
46.542	0.574351	0.0847937				48.52	0.713512	0.0470143
74.8035	0.524235	0.0782476				76.7985	0.569783	0.0409591
103.057	0.710835	0.0882819				105.034	0.57594	0.0405745
131.362	0.696062	0.0857884				133.34	0.625248	0.0419269
159.774	0.55064	0.0757282				161.757	0.617504	0.0414072
188.061	0.697675	0.0840963				190.129	0.608351	0.0410701
216.302	0.590449	0.0776242				218.385	0.676185	0.0434406
244.552	0.577896	0.0766371				246.67	0.615311	0.0417301
272.805	0.670261	0.0826065				274.943	0.704388	0.0450687
301.118	0.618728	0.0799758				303.255	0.707803	0.0456612
329.341	0.703139	0.0860116				331.57	0.648691	0.0441983
357.597	0.700587	0.0870084				359.841	0.699608	0.0467076
385.988	0.714324	0.0894063				388.145	0.719387	0.0480289
414.308	0.818647	0.0972882				416.454	0.81149	0.0522469
442.543	0.717532	0.0935385				444.783	0.685818	0.049179
470.798	0.647651	0.0917133				473.072	0.674345	0.0503287
499.089	0.845646	0.108429				501.4	0.648078	0.0512991
527.474	0.721113	0.104231				529.73	0.706357	0.0557414
555.747	0.667556	0.104406				557.993	0.685233	0.0577793
nan	nan	nan				nan	nan	nan
19.661	0.539332	0.0524411				19.924	0.625605	0.0602691
47.892	0.60809	0.0527895				48.319	0.546783	0.0521908
76.252	0.566318	0.048796				76.5625	0.704181	0.0562726
104.553	0.633651	0.0503134				104.822	0.59691	0.0503278
132.939	0.728508	0.0530638				133.062	0.633947	0.0508188
161.19	0.624787	0.0486994				161.511	0.663472	0.0514066
189.406	0.657744	0.0497844				189.851	0.742774	0.0541041
217.695	0.596741	0.0472329				218.183	0.668761	0.0510585
246.068	0.591074	0.0472288				246.492	0.551235	0.046311
274.381	0.700268	0.0518343				274.81	0.594336	0.0481064
302.623	0.670564	0.0510476				303.043	0.705401	0.052215
330.849	0.520638	0.0455376				331.366	0.677258	0.0514097
359.187	0.673991	0.052537				359.673	0.749421	0.0544449
387.492	0.732524	0.0556071				388.009	0.602162	0.0489001
415.747	0.57913	0.0502741				416.24	0.645173	0.0510691
444.031	0.699155	0.0564115				444.555	0.715708	0.054021
472.408	0.697435	0.0575961				472.834	0.693137	0.0535466
500.683	0.668372	0.0578089				501.183	0.757601	0.0562353
528.936	0.605282	0.0560224				529.591	0.730468	0.0557727
557.168	0.827457	0.0672088				557.851	0.800709	0.058954
nan	nan	nan				nan	nan	nan
18.848	0.57613	0.082409				19.8655	0.698755	0.0628281
47.248	0.727122	0.0882906				48.189	0.527037	0.0510054
75.528	0.638769	0.0799443				76.49	0.619512	0.0529914
103.768	0.70362	0.0818967				104.72	0.659877	0.0532409
132.009	0.769436	0.084061				132.98	0.692298	0.0538027
160.33	0.667941	0.0777415				161.211	0.647195	0.0512292
188.731	0.658178	0.0771276				189.604	0.67894	0.0521399
217.112	0.754414	0.0824188				217.92	0.751287	0.0547247
245.593	0.756542	0.0826513				246.172	0.75496	0.0551383
273.818	0.593937	0.073195				274.412	0.659597	0.0518884
302.118	0.603734	0.0749735				302.712	0.807366	0.0579014
330.44	0.725333	0.0827641				330.959	0.714123	0.0548436
358.722	0.459893	0.0664581				359.209	0.698758	0.0551414
386.943	0.572565	0.0746308				387.598	0.750055	0.057775
415.289	0.777094	0.0881039				416.007	0.641869	0.0545085
443.59	0.639866	0.0807151				444.255	0.717226	0.0586371
471.921	0.850175	0.0945933				472.571	0.666544	0.0578675
500.166	0.739168	0.0897542				500.803	0.602793	0.0562754
528.461	0.529203	0.0772887				529.038	0.731126	0.0637179
556.75	0.585676	0.0837753				557.288	0.660773	0.0625121
nan	nan	nan				nan	nan	nan
17.151	0.610187	0.0687311				19.0615	0.660398	0.0616565
45.432	0.593687	0.063359				47.262	0.675879	0.0580278
73.672	0.643485	0.0631729				75.502	0.620392	0.0532614
101.914	0.674854	0.0624656				103.762	0.642158	0.0526722
130.155	0.667915	0.0607926				132.003	0.650818	0.0520057
158.476	0.63058	0.0581174				160.237	0.663745	0.0520546
186.878	0.751438	0.0629205				188.731	0.63856	0.050864
215.174	0.51845	0.0521615				217.131	0.735932	0.0546258
243.426	0.633793	0.0572144				245.451	0.649631	0.0512623
271.706	0.683139	0.0593086				273.76	0.604239	0.049896
299.991	0.673817	0.0587199				302.08	0.706636	0.0542682
328.232	0.691271	0.059569				330.321	0.698264	0.0547635
356.524	0.622216	0.0566309				358.629	0.744522	0.0573485
384.872	0.673176	0.0591134				386.89	0.747419	0.0588017
413.192	0.70764	0.0607559				415.17	0.668265	0.0569566
441.573	0.646233	0.0585766				443.49	0.756518	0.0616466
469.893	0.553025	0.0542878				471.83	0.67891	0.0596178
498.153	0.756242	0.0642273				500.15	0.804742	0.0662401
526.533	0.682818	0.0613937				528.39	0.732618	0.064586
554.853	0.703391	0.0629913				556.643	0.923322	0.0747573
nan	nan	nan				nan	nan	nan
20.881	0.644724	0.107617				18.881	0.619378	0.0593945
49.203	0.833126	0.115704				47.122	0.780124	0.0623457
77.603	0.646732	0.0976342				75.36	0.633986	0.0542302
105.923	0.746123	0.10263				103.691	0.645267	0.0534681
134.241	0.604317	0.0902071				132.071	0.536968	0.0484699
162.461	0.672511	0.0952358				160.393	0.674456	0.0544179
190.701	0.634907	0.0917634				188.612	0.659757	0.054299
218.956	0.761566	0.101011				216.863	0.69541	0.056664
247.261	0.818246	0.105784				245.111	0.687357	0.0573519
275.583	0.635495	0.0938259				273.358	0.706809	0.0600269
303.843	0.560548	0.0898841				301.651	0.599622	0.0569787
332.123	0.592969	0.0938879				330.007	0.728848	0.0650136
360.433	0.624598	0.0988987				358.401	0.700922	0.0663127
388.719	0.760134	0.11224				386.778	0.689588	0.0680302
417.022	0.710295	0.111095				415.029	0.799229	0.07596
445.343	0.755763	0.118211				443.308	0.811565	0.0793062
473.563	0.45273	0.0945689				471.654	0.702746	0.0767713
501.803	0.890667	0.137658				499.979	0.891237	0.0901551
530.123	0.701025	0.12612				528.239	0.980466	0.0991892
558.363	0.822255	0.141258				556.54	0.721927	0.0889791
nan	nan	nan				nan	nan	nan
19.862	0.58721	0.063392				20.054	0.780487	0.104444
48.142	0.759491	0.0682923				48.383	0.645728	0.0896643
76.382	0.641786	0.0604451				76.805	0.668166	0.0878482
104.642	0.631635	0.0584629				105.095	0.789594	0.0931799
133.022	0.7443	0.0623225				133.407	0.557369	0.0781444
161.282	0.627311	0.0564002				161.679	0.574138	0.0797183
189.502	0.64545	0.0566773				189.975	0.582606	0.0808948
217.751	0.717478	0.059455				218.312	0.478559	0.0748347
246.011	0.58602	0.0535565				246.554	0.646272	0.0880611
274.384	0.558509	0.0521386				274.952	0.900154	0.106238
302.624	0.667408	0.0568832				303.352	0.687781	0.0955074
330.964	0.740922	0.0601756				331.596	0.789334	0.105629
359.324	0.61518	0.0550873				359.889	0.719028	0.10393
387.604	0.726652	0.0600106				388.204	0.9271	0.12408
415.85	0.693591	0.0591161				416.556	0.68111	0.110659
444.171	0.676548	0.0587361				444.847	0.977927	0.139934
472.472	0.670576	0.058885				473.099	0.802122	0.135812
500.96	0.66689	0.0594831				501.355	0.983339	0.159805
529.261	0.652149	0.0593569				529.728	0.962467	0.170466
557.592	0.69367	0.0621201				557.979	0.680094	0.152405
nan	nan	nan				nan	nan	nan
19.12	0.643379	0.0603289				19.26	0.771605	0.106139
47.369	0.58735	0.0539032				47.603	0.590476	0.085339
75.609	0.657601	0.0543047				76.004	0.62839	0.0826156
103.869	0.674794	0.0532486				104.465	0.658146	0.0817352
132.149	0.700136	0.0531471				132.866	0.70003	0.0826038
160.409	0.595604	0.0482087				161.087	0.615011	0.0757941
188.729	0.654484	0.0501131				189.355	0.67582	0.0791969
217.029	0.697859	0.0513762				217.671	0.627507	0.0761887
245.297	0.626844	0.048422				245.989	0.72458	0.0816253
273.597	0.645368	0.049271				274.349	0.838958	0.0890505
301.857	0.703561	0.0515187				302.695	0.718401	0.0825111
330.159	0.674376	0.0506124				331.115	0.700896	0.0821374
358.419	0.646428	0.0500849				359.43	0.595485	0.0769705
386.739	0.723966	0.0535896				387.661	0.749316	0.0872199
415.039	0.721358	0.0539893				415.909	0.555227	0.07636
443.379	0.752498	0.0558557				444.159	0.468223	0.0714927
471.699	0.745475	0.0564291				472.542	0.86652	0.100198
500.059	0.683801	0.055172				500.869	0.827532	0.10124
528.44	0.607626	0.0529486				529.181	0.792969	0.102515
556.72	0.668096	0.0567367				557.578	0.745241	0.103492
nan	nan	nan				nan	nan	nan
20.56	0.483069	0.0868913				18.82	0.722631	0.0655066
48.781	0.557638	0.0872062				47.12	0.718715	0.0628742
77.101	0.844467	0.10255				75.4655	0.576286	0.0547601
105.341	0.744529	0.0939265				103.759	0.719705	0.060474
133.721	0.565256	0.0800396				132.079	0.70235	0.0594346
161.978	0.693205	0.0874478				160.339	0.601623	0.0552142
190.239	0.485137	0.0724094				188.56	0.737067	0.06129
218.481	0.59826	0.0800447				216.822	0.623427	0.0567417
246.861	0.495916	0.073209				245.127	0.628891	0.0577181
275.121	0.657466	0.0842862				273.539	0.674666	0.0609069
303.401	0.872168	0.0976472				301.939	0.693319	0.0628478
331.741	0.671737	0.0868318				330.169	0.703103	0.0648063
359.981	0.681459	0.0895963				358.42	0.650138	0.0644496
388.241	0.728112	0.095734				386.659	0.56318	0.0622626
416.481	0.586096	0.0874858				414.899	0.550281	0.0640409
444.861	0.927228	0.114303				443.12	0.910014	0.0864978
473.199	0.768121	0.107712				471.36	0.682986	0.0789625
501.481	0.773051	0.112927				499.78	0.655891	0.0827385
529.821	0.79355	0.119814				528.02	0.932763	0.104438
558.062	0.806374	0.127702				556.24	0.776847	0.100429
nan	nan	nan				nan	nan	nan
19.38	0.752774	0.101644
47.621	0.537969	0.07942
75.901	0.627944	0.0804994
104.241	0.678195	0.0800251
132.481	0.734321	0.0802223
160.742	0.673888	0.0745088
189.042	0.759461	0.0772101
217.442	0.7425	0.0750984
245.682	0.704945	0.0720365
273.948	0.71349	0.0721624
302.288	0.752596	0.0731916
330.57	0.604963	0.0653096
358.81	0.722249	0.0709105
387.051	0.726977	0.0710343
415.391	0.642776	0.0667311
443.691	0.752315	0.0721504
471.911	0.892776	0.0784125
500.152	0.732078	0.071533
528.412	0.717798	0.0711607
556.658	0.833088	0.0767955
nan	nan	nan
19.13	0.403798	0.128127
47.432	0.342175	0.108567
75.672	0.574685	0.132126
103.921	0.451092	0.113036
132.162	0.974573	0.160506
160.487	0.854051	0.146725
188.851	0.795363	0.138693
217.254	0.530413	0.1133
245.512	0.788382	0.137475
273.828	0.840633	0.142337
302.09	0.559343	0.11685
330.372	0.891716	0.150993
358.613	0.847165	0.150027
387.04	0.865394	0.153258
415.363	0.869377	0.156432
443.649	0.586591	0.13144
472.054	0.857567	0.162377
500.461	0.529426	0.132674
528.882	0.785937	0.16792
557.25	0.519018	0.144355
nan	nan	nan
20.796	0.597404	0.0432811
49.116	0.512202	0.0379072
77.356	0.651008	0.0413986
105.616	0.653658	0.0405202
133.876	0.633644	0.0392038
162.137	0.659691	0.039626
190.378	0.618711	0.0382067
218.669	0.670436	0.0394991
246.972	0.680368	0.0399468
275.433	0.621154	0.0380696
303.836	0.72783	0.0414738
332.08	0.661059	0.0397797
360.449	0.671768	0.040571
388.83	0.681924	0.0412597
417.11	0.660409	0.0410964
445.43	0.777417	0.0454157
473.69	0.653159	0.042398
501.971	0.639116	0.0429533
530.231	0.727092	0.0468091
558.491	0.630838	0.0448902
nan	nan	nan
20.293	0.649548	0.0656917
48.533	0.642802	0.0613609
76.9055	0.705991	0.061294
105.195	0.732158	0.0604657
133.439	0.745148	0.0597386
161.686	0.670957	0.055789
190.022	0.696367	0.0558254
218.407	0.706599	0.055934
246.855	0.654497	0.053328
275.269	0.746477	0.0566671
303.497	0.577584	0.0497672
331.824	0.646196	0.0524778
360.047	0.640955	0.0523976
388.296	0.629755	0.0520039
416.557	0.766038	0.0576586
444.877	0.718462	0.055837
473.197	0.718624	0.0560185
501.522	0.702288	0.0555925
529.806	0.650991	0.0537586
558.045	0.849049	0.0615263
nan	nan	nan
20.161	0.703539	0.0830174
48.474	0.591464	0.0712872
76.874	0.668864	0.0722123
105.134	0.616521	0.067346
133.401	0.736399	0.0716154
161.682	0.653806	0.0661225
189.922	0.618599	0.0632083
218.144	0.636762	0.0631225
246.384	0.700349	0.0656743
274.784	0.63937	0.0621738
303.044	0.645929	0.0622277
331.304	0.748043	0.0667265
359.646	0.711944	0.0648028
387.911	0.681235	0.0633279
416.172	0.660631	0.0624982
444.476	0.597207	0.0591992
472.802	0.594187	0.0594859
501.21	0.606826	0.0601533
529.611	0.751726	0.0673228
557.931	0.68866	0.0645776
nan	nan	nan
18.641	0.670246	0.0838863
46.94	0.515559	0.0695994
75.3	0.58683	0.0717768
103.581	0.591847	0.0698308
131.822	0.700523	0.0751965
160.142	0.637148	0.0708779
188.373	0.663013	0.0720001
216.713	0.640277	0.0707904
245.082	0.750324	0.0770794
273.569	0.691928	0.074704
301.902	0.700355	0.0760579
330.202	0.784604	0.0814656
358.483	0.697627	0.0780936
386.745	0.635853	0.075026
415.024	0.649129	0.0776803
443.264	0.760102	0.085629
471.483	0.749337	0.0860659
499.728	0.595805	0.0790135
528.067	0.661758	0.0848367
556.444	0.736324	0.092162
nan	nan	nan
19.607	0.595442	0.136901
47.869	0.742583	0.143176
76.19	0.499096	0.111826
104.49	0.765168	0.133424
132.89	0.575724	0.113106
161.132	0.890584	0.139316
189.372	0.787454	0.131459
217.659	0.664347	0.121497
245.939	0.543441	0.10888
274.265	0.599371	0.115549
302.568	0.610171	0.117632
330.809	0.744315	0.131801
359.19	0.7044	0.128827
387.59	0.639702	0.125682
415.85	0.575105	0.120144
444.132	0.73564	0.139275
472.517	0.971439	0.164504
500.798	0.708586	0.144923
529.058	0.874837	0.16565
557.378	0.802629	0.164171
nan	nan	nan
17.081	0.674719	0.0879542
45.323	0.603367	0.0761087
73.723	0.725373	0.0792442
102.123	0.592108	0.0708531
130.363	0.681078	0.0718789
158.603	0.646656	0.0698133
187.058	0.717744	0.0733454
215.318	0.704066	0.0730981
243.579	0.64746	0.0694972
271.821	0.675831	0.0713248
300.043	0.754159	0.0762786
328.443	0.776272	0.0781192
356.866	0.669944	0.0736248
385.087	0.705125	0.0770308
413.347	0.671792	0.0766513
441.667	0.729068	0.0816155
469.987	0.693373	0.0818172
498.287	0.6357	0.0814943
526.527	0.746487	0.0920075
554.923	0.696431	0.0931881
nan	nan	nan
18.922	0.688952	0.111933
47.282	0.746458	0.107897
75.583	0.568668	0.0900385
103.827	0.647953	0.0936502
132.053	0.501576	0.0804238
160.453	0.72002	0.0946696
188.877	0.699858	0.092017
217.117	0.836644	0.100137
245.337	0.682813	0.0905591
273.577	0.710422	0.0926113
301.922	0.633599	0.0888377
330.222	0.584867	0.0854229
358.462	0.82623	0.103423
386.702	0.652881	0.0933941
415.082	0.830708	0.107397
443.322	0.814716	0.108066
471.585	0.517445	0.0875889
499.947	0.772445	0.109398
528.233	0.794079	0.112464
556.473	0.576358	0.0975664
nan	nan	nan
19.286	0.518653	0.060358
47.526	0.55465	0.0585295
75.766	0.665706	0.0613569
104.026	0.584511	0.0557936
132.326	0.662297	0.0583826
160.572	0.664839	0.0579372
188.952	0.7223	0.059855
217.272	0.619727	0.0552743
245.696	0.619173	0.0552248
273.936	0.742232	0.0606825
302.156	0.754438	0.0614766
330.437	0.734056	0.0608298
358.812	0.707245	0.0605002
387.132	0.712677	0.061415
415.352	0.771212	0.0650338
443.62	0.799492	0.0674203
471.926	0.70545	0.0647486
500.25	0.766185	0.0686187
528.472	0.716477	0.0674844
556.712	0.626973	0.0644008
nan	nan	nan
19.475	0.559635	0.0792434
47.755	0.622299	0.0784982
75.997	0.817253	0.086261
104.21	0.703558	0.0773213
132.537	0.72237	0.0766669
160.788	0.7638	0.0784649
189.035	0.555178	0.0664318
217.479	0.558196	0.0663209
245.8	0.601329	0.0686072
274.067	0.671789	0.0729538
302.393	0.644212	0.0712259
330.696	0.867149	0.0839459
359.02	0.748592	0.0785736
387.408	0.667877	0.0752333
415.815	0.74422	0.0803535
444.039	0.610718	0.0741487
472.346	0.610131	0.075192
500.708	0.575429	0.0743764
528.93	0.789596	0.0889541
557.193	0.582632	0.0779529
nan	nan	nan
20.687	0.77112	0.0868713
48.927	0.754501	0.0809947
77.167	0.701104	0.0752589
105.465	0.571822	0.0661033
133.7	0.665127	0.0701946
162.045	0.635704	0.0674635
190.367	0.600252	0.0648009
218.67	0.655693	0.0673525
247.081	0.632669	0.0660373
275.488	0.694989	0.0695838
303.881	0.637905	0.0665842
332.126	0.625031	0.0663303
360.451	0.64976	0.0681941
388.649	0.70792	0.0719671
416.956	0.588078	0.0662396
445.307	0.715416	0.0738811
473.561	0.644403	0.071247
501.851	0.650676	0.0728349
530.179	0.749388	0.079987
558.42	0.665848	0.077498
nan	nan	nan
20.079	0.718375	0.119919
48.3415	0.836097	0.124832
76.742	0.827124	0.120832
105.062	0.683558	0.106911
133.453	0.424339	0.0817928
161.708	0.632668	0.0977604
190.026	0.838168	0.111179
218.362	0.574154	0.0897907
246.644	0.566349	0.0885695
274.89	0.587647	0.0897367
303.143	0.772685	0.101599
331.361	0.507701	0.082472
359.686	0.701041	0.0964259
388.094	0.772604	0.100723
416.499	0.614601	0.0897682
444.9	0.725052	0.0970205
473.219	0.616286	0.0900144
501.586	0.724174	0.0969028
529.867	0.693031	0.094436
558.162	0.753646	0.09825
nan	nan	nan
18.121	0.601164	0.0573842
46.481	0.615131	0.0540137
74.799	0.629832	0.0520105
103.189	0.571301	0.0478296
131.597	0.606612	0.0481656
159.912	0.594694	0.0469247
188.137	0.752773	0.0523966
216.378	0.660302	0.0487416
244.629	0.585596	0.0457821
272.851	0.656324	0.0484478
301.112	0.579588	0.0454509
329.414	0.567563	0.0450635
357.833	0.669425	0.0487579
386.116	0.625913	0.0471057
414.358	0.785053	0.0526501
442.65	0.733201	0.0509107
470.933	0.653982	0.0481442
499.258	0.637635	0.0477198
527.502	0.60862	0.0468744
555.746	0.773899	0.0531047
nan	nan	nan
18.389	0.618212	0.0714692
46.787	0.639025	0.0693939
75.112	0.574222	0.0634837
103.434	0.566142	0.0614753
131.686	0.635208	0.0635951
159.929	0.621776	0.0622496
188.333	0.739459	0.0670328
216.718	0.766152	0.0678073
245.189	0.693566	0.064199
273.611	0.723813	0.0658841
302.008	0.682774	0.0643081
330.339	0.637622	0.0629004
358.648	0.675488	0.0653807
386.89	0.730278	0.0687853
415.134	0.738932	0.0702251
443.378	0.687001	0.068106
471.668	0.714067	0.0704464
499.999	0.617166	0.0658663
528.404	0.751346	0.0737694
556.708	0.624818	0.0678502
nan	nan	nan
20.661	0.622748	0.101171
48.901	0.542891	0.0893768
77.121	0.722979	0.101378
105.441	0.731542	0.100624
133.841	0.562129	0.0879094
162.103	0.651898	0.0952191
190.38	0.589731	0.0911223
218.78	0.708631	0.100355
247.06	0.661563	0.0976774
275.28	0.558127	0.0894961
303.52	0.763039	0.105965
331.86	0.67954	0.100333
360.103	0.689384	0.101788
388.345	0.625841	0.0978786
416.707	0.604578	0.0969485
445.089	0.644579	0.100811
473.369	0.816758	0.114538
501.618	0.901148	0.122818
529.839	0.673658	0.108033
558.159	0.773662	0.118162
nan	nan	nan
18.56	0.685246	0.0832032
46.94	0.594379	0.0732498
75.181	0.57425	0.0687153
103.441	0.493299	0.0617305
131.721	0.529919	0.0625209
160.061	0.713377	0.071786
188.302	0.679376	0.0694225
216.562	0.619848	0.0661528
244.882	0.792418	0.0743145
273.272	0.630536	0.0661754
301.512	0.629426	0.0664249
329.753	0.696476	0.0704409
358.053	0.753434	0.0736216
386.293	0.651829	0.069176
414.553	0.678048	0.0711649
442.793	0.671596	0.0716789
471.254	0.771832	0.0784691
499.654	0.798387	0.0811708
527.954	0.691685	0.0769488
556.291	0.666396	0.0770431
nan	nan	nan
18.93	0.630378	0.190701
47.25	0.411631	0.146139
75.65	0.383768	0.136244
103.89	0.808976	0.191145
132.15	0.648171	0.167798
160.446	0.587787	0.15752
188.75	0.449946	0.136095
217.022	0.899525	0.19221
245.325	0.488431	0.141419
273.723	0.852596	0.186473
301.96	0.374343	0.125244
330.211	0.76065	0.179719
358.541	1.00731	0.210518
386.846	0.625751	0.1677
415.087	0.756814	0.189697
443.502	0.802741	0.201217
471.797	1.05265	0.242119
500.041	0.497615	0.176679
528.404	1.35179	0.319557
556.673	0.795098	0.266117
nan	nan	nan
20.772	0.743485	0.120799
49.012	0.645413	0.106265
77.272	0.634568	0.100479
105.513	0.647583	0.0977634
133.753	0.598437	0.0913855
161.973	0.716027	0.0975718
190.213	0.780722	0.100099
218.473	0.608818	0.0870879
246.793	0.578904	0.0836656
275.053	0.761547	0.0953217
303.351	0.608102	0.0844367
331.592	0.570727	0.0808151
359.832	0.587016	0.0815073
388.072	0.551687	0.0789115
416.532	0.633634	0.0840334
445.012	0.536927	0.0767993
473.272	0.659171	0.0852071
501.512	0.703487	0.0880498
529.732	0.6637	0.0857929
557.972	0.719051	0.0893037
nan	nan	nan
19.322	0.580316	0.114009
47.582	0.717359	0.11975
75.983	0.938838	0.131673
104.203	0.633566	0.104313
132.463	0.674931	0.105561
160.723	0.531118	0.0912195
189.023	0.619598	0.0969019
217.343	0.648932	0.0979671
245.583	0.686533	0.100281
273.883	0.509775	0.0850817
302.223	0.657725	0.0960708
330.623	0.781989	0.104645
358.843	0.69299	0.0981385
387.144	0.579052	0.0894715
415.475	0.753519	0.101746
443.715	0.714718	0.0992501
471.963	0.752268	0.101577
500.203	0.657907	0.0950901
528.523	0.551512	0.0862483
556.783	0.839004	0.106706
nan	nan	nan

## Sheet: Figure 4
Normalized 234U profiles
Note: The data for individual traces are displayed continuously split by "nans"
Graphite																		Silicon
All Traces							Average											All Traces							Average
O		O2		O3			O			O2			O3					O		O2		O3			O			O2			O3
Time	RSF	Time	RSF	Time	RSF		Time	RSF	+-	Time	RSF	+-	Time	RSF	+-			Time	RSF	Time	RSF	Time	RSF		Time	RSF	+-	Time	RSF	+-	Time	RSF	+-
30.801	0.629339	30.561	0.822267	32.406	1		31.118	0.701761	0.122109	30.9919	0.741008	0.105661	31.118	0.701761	0.122109			30.541	1	29.022	0.951356	31.835	0.99948		31.0017	0.965672	0.0418063	30.6927	0.921384	0.0591827	31.1876	0.889653	0.0730682
59.022	0.71683	58.813	0.908714	60.655	0.979212		59.4289	0.803099	0.106297	59.3115	0.822504	0.119626	59.4289	0.803099	0.106297			58.889	0.803949	57.275	0.887493	60.078	1		59.2952	0.895015	0.0790154	58.994	0.921477	0.0550534	59.461	0.937124	0.0571956
87.264	0.779623	87.052	0.960519	88.988	0.993941		87.7542	0.874313	0.0926497	87.6387	0.882344	0.104192	87.7542	0.874313	0.0926497			87.355	0.810467	85.609	0.923718	88.296	0.955027		87.6023	0.932827	0.0630775	87.3102	0.969491	0.0278712	87.7571	0.962838	0.0300421
115.674	0.829087	115.313	0.97657	117.304	0.951479		116.057	0.922877	0.0648277	115.961	0.924545	0.0642608	116.057	0.922877	0.0648277			115.608	0.824271	113.9	0.958823	116.552	0.90909		115.941	0.951446	0.0562755	115.633	0.987662	0.0165708	116.08	0.976827	0.0263759
143.994	0.881403	143.608	1	145.617	0.936907		144.364	0.954201	0.0491048	144.275	0.943255	0.0611072	144.364	0.954201	0.0491048			143.848	0.827027	142.149	0.981885	144.885	0.84153		144.229	0.985786	0.0284102	143.939	0.992647	0.0124874	144.394	0.982435	0.0177298
172.414	0.916421	171.948	0.981	173.948	0.927401		172.671	0.976998	0.0195786	172.593	0.956895	0.0458909	172.671	0.976998	0.0195786			172.067	0.825157	170.469	1	173.095	0.758853		172.494	0.993398	0.0157476	172.24	0.988222	0.01652	172.714	0.982497	0.017875
200.722	0.931382	200.334	0.952733	202.238	0.910479		200.965	0.981992	0.0213682	200.899	0.973058	0.0282459	200.965	0.981992	0.0213682			200.325	0.820364	198.821	0.986233	201.357	0.670521		200.788	0.987239	0.0245913	200.523	0.968775	0.0355879	201.023	0.976752	0.0334153
228.964	0.962772	228.568	0.924891	230.588	0.937534		229.269	0.982227	0.0223857	229.215	0.980676	0.020709	229.269	0.982227	0.0223857			228.626	0.820029	227.109	0.99307	229.605	0.593957		229.103	0.974676	0.034195	228.828	0.959211	0.0537108	229.311	0.95917	0.0627839
257.286	0.964445	256.815	0.876094	258.883	0.928916		257.575	0.990233	0.0140212	257.527	0.983078	0.0187148	257.575	0.990233	0.0140212			257.132	0.803421	255.361	0.983421	257.892	0.534896		257.442	0.963874	0.0444629	257.135	0.942465	0.0591157	257.612	0.939963	0.0842955
285.506	0.981111	285.036	0.820067	287.124	0.925208		285.889	0.985135	0.0226545	285.831	0.980267	0.0216526	285.889	0.985135	0.0226545			285.582	0.793907	283.688	0.963909	286.146	0.469452		285.761	0.952736	0.0453267	285.467	0.92902	0.0660111	285.878	0.919308	0.0929007
313.773	0.983088	313.274	0.755615	315.374	0.886872		314.192	0.96751	0.042423	314.12	0.977552	0.0334616	314.192	0.96751	0.042423			313.934	0.791487	311.981	0.952386	314.394	0.393914		314.065	0.944774	0.0375577	313.779	0.910183	0.0809119	314.181	0.898872	0.113521
342.066	0.987886	341.676	0.679922	343.623	0.910897		342.488	0.956612	0.0481568	342.437	0.963768	0.0561399	342.488	0.956612	0.0481568			342.31	0.779265	340.321	0.944043	342.779	0.336857		342.391	0.928981	0.0351689	342.059	0.894557	0.0819354	342.506	0.873871	0.134719
370.466	0.995187	370.026	0.614106	371.935	0.929229		370.789	0.949619	0.0522909	370.791	0.952117	0.0750368	370.789	0.949619	0.0522909			370.538	0.782788	368.652	0.916466	371.009	0.275814		370.697	0.904394	0.0510082	370.356	0.875008	0.0825672	370.849	0.848731	0.146044
398.706	0.996468	398.416	0.547749	400.165	0.925939		399.082	0.929559	0.0672218	399.131	0.935237	0.0970869	399.082	0.929559	0.0672218			398.788	0.761508	396.951	0.883944	399.266	0.210562		398.993	0.888615	0.0499607	398.7	0.854097	0.0955206	399.148	0.808438	0.193606
426.954	0.998719	426.737	0.491843	428.486	0.913352		427.386	0.902114	0.0854348	427.465	0.919174	0.0902085	427.386	0.902114	0.0854348			427.043	0.764935	425.181	0.859642	427.522	0.15031		427.299	0.867207	0.0563254	427.005	0.826418	0.104191	427.447	0.771976	0.218835
455.286	0.998675	455.157	0.44513	456.726	0.908756		455.68	0.875933	0.100219	455.772	0.89901	0.10537	455.68	0.875933	0.100219			455.262	0.75952	453.443	0.827753	455.893	0.0855719		455.591	0.846108	0.0644351	455.282	0.799789	0.122418	455.759	0.739963	0.241022
483.686	1	483.46	0.392081	484.956	0.9262		483.968	0.841511	0.122429	484.102	0.877681	0.124362	483.968	0.841511	0.122429			483.511	0.741403	481.822	0.798831	484.184	0.0467468		483.865	0.825496	0.0703795	483.6	0.76776	0.117652	484.051	0.702589	0.253743
512.066	0.982948	511.698	0.343729	513.222	0.890163		512.285	0.822193	0.11914	512.382	0.856898	0.129754	512.285	0.822193	0.11914			511.902	0.734191	510.111	0.772981	512.484	0.0363171		512.166	0.799021	0.0890391	511.923	0.729277	0.151253	512.361	0.671225	0.260264
540.388	0.991759	540.028	0.291085	541.53	0.873398		540.593	0.784237	0.13929	540.658	0.833144	0.13527	540.593	0.784237	0.13929			540.382	0.716626	538.403	0.741681	540.855	0.0221946		540.474	0.772877	0.0790517	540.249	0.697392	0.14912	540.539	0.659351	0.241371
568.609	0.983429	568.317	0.244546	569.846	0.879404		568.889	0.734165	0.178228	568.98	0.805985	0.154868	568.889	0.734165	0.178228			568.643	0.7028	566.774	0.72127	569.105	0.0109673		568.75	0.744226	0.0900712	568.569	0.650268	0.186744	568.828	0.621932	0.261968
nan	nan	nan	nan	nan	nan													nan	nan	nan	nan	nan	nan
30.551	0.577142	30.79	0.827289	28.797	0.453069													31.44	1	30.502	0.878064	32.295	0.957716
58.871	0.675872	59.124	0.906691	57.048	0.626801													59.74	0.896821	58.822	0.945581	60.622	0.996527
87.252	0.758462	87.513	0.953422	85.338	0.742905													87.98	0.908694	87.118	0.982062	88.879	1
115.493	0.824827	115.757	0.976637	113.799	0.839655													116.221	0.937301	115.46	1	117.339	0.986834
143.739	0.872865	144.015	0.993905	142.339	0.923274													144.461	0.945388	143.749	0.994159	145.671	0.968355
172.06	0.910778	172.316	1	170.669	0.954654													172.783	0.950724	171.994	0.991503	173.923	0.958182
200.32	0.942918	200.604	0.996255	198.96	0.980887													201.164	0.955381	200.249	0.97523	202.215	0.924078
228.539	0.954788	228.896	0.984791	227.39	1													229.487	0.953047	228.67	0.945917	230.543	0.873263
256.79	0.967746	257.265	0.967816	255.671	0.99692													257.76	0.950021	257.041	0.907341	258.962	0.819085
285.02	0.980882	285.526	0.941073	283.91	0.999201													286.16	0.953642	285.291	0.87832	287.255	0.777439
313.34	0.984264	313.857	0.918719	312.17	0.992769													314.46	0.940648	313.683	0.843604	315.573	0.743192
341.76	0.99267	342.137	0.888398	340.42	0.971949													342.7	0.928452	341.921	0.80222	343.924	0.685882
370.063	0.999603	370.492	0.853336	368.711	0.979806													370.921	0.922831	370.161	0.766166	372.344	0.619566
398.39	1	398.818	0.807947	396.962	0.955862													399.161	0.917067	398.422	0.731345	400.635	0.558724
426.61	0.997182	427.107	0.767443	425.207	0.941366													427.561	0.899596	426.702	0.692416	428.924	0.51156
454.948	0.992775	455.357	0.722047	453.462	0.91272													455.809	0.882161	454.963	0.638249	457.175	0.463715
483.323	0.988107	483.689	0.681242	481.763	0.868322													484.052	0.861751	483.211	0.570656	485.426	0.436027
511.582	0.983741	511.976	0.641432	510.183	0.85057													512.3	0.84539	511.523	0.509018	513.675	0.414619
539.883	0.980966	540.229	0.591185	538.555	0.813815													540.541	0.824659	539.754	0.439058	nan	nan
568.155	0.966261	568.563	0.550458	566.8	0.775349													568.762	0.80187	568.003	0.375068	30.952	0.890484
nan	nan	nan	nan	nan	nan													nan	nan	nan	nan	59.277	0.945057
30.362	0.600026	31.389	0.721865	31.402	0.786678													30.8	0.971802	32.067	0.888866	87.534	0.986204
58.622	0.674865	59.678	0.8158	59.722	0.892348													59.125	0.951374	60.319	0.935483	115.834	1
86.943	0.74186	87.929	0.883146	88.063	0.936428													87.465	0.973444	88.648	0.975529	144.084	0.992869
115.29	0.798076	116.22	0.939365	116.313	0.96632													115.788	0.980264	116.98	0.995971	172.334	0.967742
143.563	0.845341	144.471	0.971687	144.613	0.985933													144.069	0.992958	145.278	1	200.654	0.943172
171.983	0.882224	172.797	0.998371	172.924	0.977381													172.329	0.997728	173.609	0.993045	229.034	0.901905
200.383	0.912419	201.054	1	201.193	1													200.578	1	201.935	0.9905	257.285	0.855261
228.63	0.935256	229.347	0.99404	229.484	0.988145													229.038	0.990596	230.229	0.975459	285.585	0.815114
256.95	0.948049	257.669	0.987603	257.734	0.97562													257.438	0.980372	258.469	0.954	313.913	0.761512
285.432	0.964724	286.008	0.975445	286.153	0.955276													285.678	0.961063	286.729	0.93038	342.245	0.710107
313.752	0.962503	314.309	0.963251	314.484	0.911895													313.998	0.94492	314.979	0.903948	370.537	0.64464
342.072	0.976322	342.548	0.946106	342.776	0.849719													342.238	0.920869	343.28	0.872839	398.786	0.587555
370.358	0.996708	370.798	0.930786	371.026	0.785479													370.478	0.88847	371.608	0.842792	427.127	0.51207
398.638	0.988339	399.049	0.910631	399.315	0.711327													398.718	0.86306	399.913	0.801823	455.438	0.43906
426.918	0.993401	427.348	0.885614	427.582	0.634897													427.038	0.827136	428.321	0.76966	483.668	0.352559
455.232	1	455.678	0.860374	455.988	0.546164													455.358	0.788362	456.649	0.739308	511.999	0.278285
483.572	0.99896	484.098	0.824658	484.307	0.455826													483.684	0.745087	484.975	0.701795	540.247	0.20739
511.816	0.990032	512.409	0.789822	512.616	0.381329													512.018	0.706531	513.262	0.665089	568.539	0.137606
540.119	0.984333	540.719	0.759021	541.024	0.296696													540.319	0.664541	541.695	0.624544	nan	nan
568.359	0.976182	569.023	0.723825	569.318	0.239364													568.559	0.621147	569.981	0.579905	31.941	0.908261
nan	nan	nan	nan	nan	nan													nan	nan	nan	nan	60.282	0.914945
29.369	0.853647	29.043	0.750999	31.61	0.850042													28.562	0.927488	31.6	0.894319	88.572	0.954478
57.853	0.909457	57.334	0.849943	59.831	0.929879													56.808	0.952393	59.84	0.947581	116.942	0.962539
86.227	0.942542	85.567	0.90965	88.253	0.978066													85.14	0.979502	88.07	0.97364	145.234	0.970156
114.752	0.966181	113.826	0.95168	116.58	0.997563													113.553	0.997404	116.32	0.996003	173.532	0.965327
143.119	0.97483	142.166	0.982343	144.871	1													141.921	0.99662	144.7	1	201.778	1
171.342	0.987421	170.457	0.986999	173.121	0.990218													170.164	1	173.11	0.988857	230.026	0.951219
199.583	0.99241	198.785	1	201.371	0.975792													198.426	0.995371	201.331	0.972399	258.234	0.909932
227.925	1	227.117	0.990374	229.592	0.946822													226.651	0.97769	229.58	0.962576	286.484	0.880954
256.251	0.998223	255.417	0.988212	258.003	0.914899													254.9	0.968457	257.823	0.942644	314.823	0.851684
284.543	0.982572	283.749	0.974397	286.33	0.87549													283.134	0.951903	286.083	0.922843	343.124	0.80981
312.867	0.974194	311.999	0.961687	314.711	0.828636													311.382	0.952099	314.371	0.881377	371.448	0.751432
341.095	0.967675	340.36	0.942412	343.044	0.776188													339.773	0.940785	342.788	0.871674	399.695	0.723797
369.343	0.949743	368.748	0.908918	371.293	0.726121													368.182	0.938238	371.174	0.841546	427.944	0.677399
397.732	0.935283	396.999	0.874298	399.618	0.676271													396.43	0.91211	399.414	0.81304	456.257	0.633692
426.142	0.921529	425.247	0.835586	427.913	0.623296													424.721	0.896364	427.665	0.7796	484.575	0.590516
454.386	0.894833	453.5	0.792991	456.319	0.576414													453.053	0.876114	455.914	0.749427	513.075	0.542228
482.631	0.871681	481.96	0.748458	484.545	0.524652													481.274	0.857039	484.255	0.699412	541.366	0.49179
510.933	0.857494	510.211	0.710334	512.871	0.488069													509.603	0.850232	512.605	0.653396	569.686	0.438768
539.185	0.834049	538.461	0.66872	541.347	0.446215													537.866	0.81561	540.954	0.622069	nan	nan
567.408	0.81197	566.763	0.602096	569.584	0.411188													566.183	0.78378	569.253	0.597452	31.593	0.940567
nan	nan	nan	nan	nan	nan													nan	nan	nan	nan	59.93	0.976287
30.811	0.683304	29.685	0.710634	31.019	0.689175													30.689	0.941771	29.119	0.892285	88.226	0.995183
59.051	0.771	58.246	0.805011	59.351	0.82171													58.95	0.95994	57.418	0.930093	116.477	1
87.453	0.846771	86.606	0.865506	87.651	0.91389													87.19	0.98343	85.683	0.965289	144.807	0.991049
115.783	0.906168	115.186	0.910487	115.898	0.968567													115.571	0.988641	114.08	0.990721	173.088	0.981161
143.992	0.94219	143.517	0.945485	144.144	0.994194													143.813	0.998724	142.369	0.997073	201.487	0.969432
172.312	0.960202	171.737	0.956046	172.442	0.990166													172.074	0.998239	170.71	0.99461	229.727	0.950165
200.66	0.979715	199.986	0.98486	200.692	1													200.367	1	198.951	0.98807	257.987	0.92968
228.875	0.995343	228.237	0.997148	228.941	0.97959													228.708	0.991499	227.251	1	286.236	0.916536
257.202	0.995718	256.48	1	257.192	0.955472													256.932	0.986593	255.54	0.985714	314.619	0.893487
285.607	0.992833	284.78	0.986625	285.482	0.922763													285.193	0.96907	283.801	0.978245	342.957	0.864624
313.838	1	313.02	0.97743	313.772	0.883459													313.514	0.945276	312.211	0.958522	371.279	0.842566
342.082	0.988971	341.43	0.956957	342.045	0.814705													341.825	0.929282	340.462	0.938515	399.735	0.801431
370.504	0.979646	369.83	0.945106	370.444	0.739237													370.201	0.900943	368.711	0.914498	428.08	0.76317
398.807	0.971208	398.157	0.922822	398.684	0.664715													398.626	0.892407	397.023	0.902067	456.371	0.732948
427.059	0.957295	426.457	0.916586	426.932	0.569135													426.846	0.858374	425.403	0.865721	484.69	0.693422
455.304	0.94612	454.688	0.90016	455.183	0.476705													455.08	0.847269	453.755	0.838915	512.934	0.663299
483.606	0.926904	482.93	0.880137	483.513	0.399504													483.402	0.824719	482.123	0.822045	541.202	0.621636
511.939	0.905021	511.25	0.861289	511.803	0.336644													511.742	0.799008	510.473	0.810726	569.482	0.578192
540.294	0.884184	539.49	0.840987	540.114	0.281454													539.991	0.781562	538.714	0.78588	nan	nan
568.554	0.867015	567.73	0.824303	568.514	0.231824													568.312	0.758296	567.003	0.775817	29.844	0.979594
nan	nan	nan	nan	nan	nan													nan	nan	nan	nan	58.13	1
32.24	0.699193	29.101	0.686198	31.842	0.470708													30.867	0.885373	31.119	1	86.48	0.983272
60.48	0.780879	57.421	0.774135	60.227	0.569268													59.107	0.915388	59.438	0.884015	114.901	0.98059
88.721	0.859722	85.687	0.842636	88.629	0.643791													87.427	0.943489	87.726	0.857168	143.23	0.972775
116.981	0.908584	113.991	0.892187	116.869	0.70268													115.847	0.956441	116.078	0.861592	171.528	0.951783
145.301	0.941777	142.234	0.923463	145.109	0.759534													144.087	0.992528	144.398	0.880378	199.877	0.929743
173.583	0.968141	170.481	0.93457	173.519	0.796607													172.307	0.989378	172.718	0.913564	228.169	0.896851
202.014	0.984441	198.892	0.971785	201.838	0.836839													200.547	0.993151	201.019	0.918401	256.42	0.873792
230.254	0.988698	227.275	0.988956	230.205	0.87143													228.807	1	229.599	0.919789	284.663	0.838987
258.474	0.99807	255.602	0.994957	258.639	0.890069													257.097	0.992785	257.979	0.916789	312.891	0.816746
286.714	1	284.004	0.998872	287.039	0.913004													285.397	0.98574	286.57	0.920051	341.15	0.779696
314.974	0.981142	312.404	1	315.345	0.927915													313.677	0.978	314.94	0.93655	369.55	0.750027
343.294	0.976472	340.804	0.996638	343.659	0.937958													342.057	0.982041	343.16	0.942625	397.922	0.727226
371.599	0.951758	369.184	0.995978	371.89	0.951028													370.458	0.960372	371.421	0.9361	426.323	0.693422
399.898	0.934353	397.444	0.991042	400.123	0.960183													398.718	0.956136	399.741	0.94795	454.58	0.65722
428.379	0.913302	425.753	0.98585	428.522	0.970283													427.038	0.939888	427.961	0.944838	482.884	0.618747
456.621	0.89179	454.004	0.971231	456.784	0.981984													455.418	0.936946	456.2	0.933813	511.132	0.577467
484.861	0.868234	482.227	0.964018	485.087	0.990918													483.658	0.93227	484.581	0.929013	539.443	0.534607
513.283	0.830246	510.455	0.950975	513.506	0.982873													511.899	0.905428	512.863	0.919226	567.672	0.505838
541.525	0.781753	538.706	0.930144	541.742	1													540.16	0.900619	541.081	0.897927	nan	nan
569.752	0.733281	567.025	0.927804	569.962	0.995899													568.457	0.878135	569.483	0.880228	31.93	0.929804
nan	nan	nan	nan	nan	nan													nan	nan	nan	nan	60.181	0.97205
29.207	0.817347	31.84	0.619583	32.149	0.572967													31.72	0.924155	29.862	1	88.512	0.975056
57.467	0.88576	60.131	0.712616	60.55	0.683338													60	0.950051	58.173	0.820142	116.829	1
85.788	0.928166	88.571	0.79158	88.951	0.761615													88.23	0.978624	86.493	0.819663	145.066	0.983685
114.171	0.964327	116.971	0.848052	117.193	0.82606													116.52	0.983914	114.834	0.848645	173.304	0.984157
142.422	0.966573	145.471	0.896145	145.413	0.892794													144.789	1	143.129	0.874412	201.612	0.952086
170.67	0.979315	173.951	0.927316	173.673	0.926844													173.119	0.995294	171.43	0.891834	229.932	0.924309
198.885	1	202.271	0.957653	201.904	0.959468													201.541	0.996217	199.67	0.893339	258.414	0.879961
227.146	0.997019	230.591	0.969927	230.306	0.97177													229.919	0.986344	227.922	0.9101	286.8	0.854804
255.466	0.996917	258.971	0.985772	258.673	0.989158													258.171	0.968997	256.163	0.904992	315.206	0.830677
283.947	0.980785	287.211	1	286.959	1													286.501	0.967398	284.523	0.911241	343.7	0.790668
312.324	0.975231	315.531	0.991811	315.245	0.990182													314.872	0.963092	312.789	0.89904	371.933	0.778261
340.588	0.954363	343.792	0.994387	343.565	0.982058													343.122	0.934642	341.08	0.888779	400.164	0.729539
368.879	0.929882	372.091	0.999627	371.805	0.974674													371.372	0.921879	369.362	0.88041	428.428	0.695498
397.227	0.914977	400.571	0.984226	400.062	0.966349													399.619	0.913083	397.75	0.877468	456.824	0.672319
425.444	0.890047	428.971	0.97634	428.319	0.945388													427.969	0.893123	426.171	0.849876	485.052	0.645491
453.7	0.862873	457.444	0.958524	456.729	0.929965													456.252	0.874332	454.393	0.842944	513.453	0.625746
481.96	0.819898	485.774	0.944438	485.106	0.919443													484.739	0.848468	482.622	0.826709	541.69	0.576942
510.28	0.765454	514.077	0.939749	513.406	0.898231													513.121	0.822052	510.943	0.813028	569.91	0.551833
538.568	0.721117	542.314	0.929074	541.82	0.874369													541.35	0.795512	539.283	0.796315	nan	nan
566.825	0.661965	570.643	0.914208	570.151	0.865694													569.594	0.770542	567.593	0.769752	29.23	0.773814
nan	nan	nan	nan	nan	nan													nan	nan	nan	nan	57.465	0.895051
32.195	0.668863	31.372	0.759309	31.068	0.554396													31.561	0.879352	30.782	1	85.692	0.947944
60.584	0.79816	59.622	0.819146	59.388	0.66954													59.802	0.914171	59.09	0.844444	113.934	0.973385
88.803	0.899344	87.913	0.865017	87.707	0.763357													88.062	0.940884	87.45	0.853596	142.184	0.984801
117.054	0.961592	116.179	0.906393	116.1	0.834924													116.462	0.964368	115.752	0.892768	170.609	0.993097
145.278	0.979004	144.423	0.921291	144.486	0.889994													144.862	0.980838	144.133	0.919584	198.966	1
173.555	0.993772	172.825	0.952633	172.826	0.937164													173.082	0.99457	172.464	0.933972	227.37	0.994978
201.856	1	201.185	0.960082	201.127	0.96208													201.402	0.994031	200.794	0.948395	255.775	0.989823
230.258	0.996116	229.526	0.979563	229.448	0.981822													229.742	0.997262	229.113	0.959578	284.026	0.971881
258.638	0.994709	257.985	0.975487	257.751	0.993095													257.99	1	257.444	0.950817	312.268	0.974071
287.139	0.980477	286.415	0.990245	285.999	0.98472													286.29	0.998743	285.753	0.950389	340.588	0.96489
315.591	0.950742	314.705	1	314.238	1													314.57	0.987524	313.983	0.940418	368.978	0.948386
343.832	0.918229	343.025	0.985382	342.53	0.989122													342.87	0.979342	342.224	0.951885	397.196	0.932016
372.089	0.868572	371.266	0.987266	370.798	0.983568													371.241	0.984458	370.564	0.937106	425.452	0.914407
400.391	0.80961	399.507	0.988306	399.122	0.967832													399.601	0.962409	399.042	0.917697	453.768	0.91788
428.638	0.776096	427.826	0.973154	427.374	0.949639													427.881	0.955917	427.404	0.908615	482.02	0.887242
456.881	0.725207	456.067	0.964777	455.601	0.927776													456.202	0.940944	455.836	0.908794	510.34	0.872642
485.21	0.674554	484.386	0.95685	483.829	0.91225													484.462	0.920303	484.066	0.886714	538.575	0.859415
513.519	0.613225	512.641	0.94122	512.091	0.894378													512.71	0.910521	512.286	0.876209	566.958	0.844594
541.849	0.550426	541.041	0.932225	540.339	0.869811													541.021	0.891901	540.689	0.857228	nan	nan
570.234	0.497504	569.45	0.910244	568.759	0.846432													569.262	0.881192	569.026	0.83985	31.381	0.870046
nan	nan	nan	nan	nan	nan													nan	nan	nan	nan	59.653	0.92372
31.422	0.656778	30.407	0.657152	30.885	0.539616													32.24	0.943134	31.901	1	88.078	0.963009
59.709	0.7585	58.805	0.73846	59.125	0.660031													60.501	0.976036	60.142	0.999351	116.391	0.987233
87.979	0.833986	87.195	0.811756	87.544	0.753033													88.782	0.980535	88.562	0.983853	144.615	0.995644
116.262	0.886353	115.425	0.856719	115.914	0.833783													117.023	0.993061	116.962	0.95983	172.935	1
144.504	0.93062	143.666	0.888151	144.242	0.885254													145.263	0.995942	145.282	0.915376	201.242	0.992236
172.922	0.958344	171.988	0.915428	172.563	0.932874													173.503	0.995942	173.586	0.861405	229.501	0.990827
201.227	0.971773	200.236	0.939844	200.823	0.950304													201.764	1	201.987	0.796157	257.732	0.983682
229.622	0.985979	228.486	0.962339	229.107	0.967104													230.004	0.984504	230.227	0.735547	285.972	0.979197
258.041	1	256.808	0.971927	257.385	0.982554													258.412	0.99606	258.547	0.674292	314.372	0.973173
286.424	0.991833	285.068	0.975331	285.668	0.99382													286.734	0.982475	286.792	0.626172	342.632	0.95549
314.765	0.994099	313.336	0.99436	313.954	1													315.114	0.96598	315.113	0.558326	370.952	0.941071
342.986	0.984298	341.589	0.997661	342.341	0.99622													343.515	0.948838	343.433	0.502665	399.345	0.93499
371.303	0.97752	369.929	0.995718	370.741	0.988974													371.735	0.929874	371.733	0.435431	427.591	0.911803
399.552	0.967434	398.322	1	399.053	0.983079													400.055	0.902031	400.133	0.381953	455.812	0.904673
427.865	0.95857	426.81	0.995864	427.463	0.968079													428.315	0.887095	428.453	0.335215	484.053	0.886145
456.117	0.944944	455.251	0.989827	455.754	0.958719													456.555	0.860282	456.713	0.287276	512.312	0.85882
484.362	0.933391	483.689	0.993086	484.014	0.952209													484.775	0.832911	485.088	0.247719	540.692	0.845654
512.608	0.911056	512.069	0.991248	512.396	0.934629													513.015	0.797867	513.428	0.218532	569.031	0.820574
540.906	0.890757	540.311	0.979634	540.646	0.915925													541.421	0.768175	541.752	0.193998	nan	nan
569.329	0.86413	568.62	0.970172	568.883	0.895047													569.661	0.740601	569.993	0.173215	30.311	0.788055
nan	nan	nan	nan	nan	nan													nan	nan	nan	nan	58.542	0.892201
29.101	0.77414	31.427	0.568843	30.808	0.704317													31.461	0.924588	31.52	0.819258	86.801	0.929154
57.338	0.865399	59.827	0.664307	59.13	0.784454													59.831	0.967466	59.92	0.875277	115.021	0.960385
85.684	0.94073	88.229	0.75771	87.592	0.833588													88.072	0.989471	88.18	0.926566	143.442	0.975666
113.983	0.977681	116.64	0.817911	115.979	0.88187													116.493	0.994398	116.518	0.975633	171.924	0.987378
142.389	0.996369	144.968	0.860662	144.38	0.913523													144.733	1	144.818	0.98865	200.303	1
170.784	1	173.264	0.901295	172.648	0.940274													172.953	0.993887	173.059	0.993932	228.544	0.990779
199.206	0.990597	201.508	0.930505	200.955	0.954101													201.233	0.983413	201.279	1	256.867	0.990156
227.509	0.975604	229.755	0.959645	229.275	0.971458													229.533	0.976936	229.599	0.99937	285.108	0.965702
255.738	0.941634	257.988	0.967655	257.515	0.98304													257.933	0.962795	257.939	0.994136	313.344	0.956601
283.995	0.910798	286.248	0.981719	285.746	0.993751													286.253	0.947286	286.339	0.985985	341.597	0.944051
312.245	0.873951	314.55	0.992673	313.989	0.994593													314.574	0.938966	314.739	0.965273	369.918	0.927262
340.649	0.833479	342.948	0.998539	342.219	0.992436													342.974	0.925117	342.959	0.9506	398.147	0.902475
368.945	0.788124	371.28	1	370.61	0.990826													371.421	0.895469	371.28	0.939222	426.378	0.877473
397.188	0.739179	399.67	0.997762	398.868	0.990456													399.661	0.865714	399.78	0.913212	454.728	0.844712
425.601	0.69559	428.082	0.977431	427.114	1													427.922	0.854074	427.994	0.898367	483.128	0.805559
453.981	0.648079	456.49	0.974793	455.428	0.989688													456.162	0.830741	456.259	0.875277	511.415	0.780728
482.401	0.603687	484.871	0.96478	483.672	0.981401													484.462	0.811332	484.499	0.856742	539.678	0.745097
510.708	0.563031	513.101	0.9465	511.911	0.969582													512.862	0.780503	512.799	0.837326	567.995	0.71658
538.95	0.521257	541.342	0.928762	540.237	0.971517													541.122	0.742854	541.199	0.815392	nan	nan
567.259	0.477305	569.692	0.914769	568.552	0.962462													569.442	0.705372	569.54	0.774494	32.147	0.863221
nan	nan	nan	nan	nan	nan													nan	nan	nan	nan	60.379	0.926575
31.52	0.666149	31.425	0.860621	31.7	0.685948													29.146	1	28.927	0.902854	88.68	0.951757
59.84	0.751479	59.736	0.916507	60.02	0.791792													57.558	0.742113	57.369	0.939467	117.087	0.972465
88.16	0.827742	87.982	0.960742	88.3	0.872208													85.92	0.712588	85.649	0.984706	145.5	0.995153
116.449	0.879558	116.235	0.989979	116.54	0.920615													114.33	0.739753	113.909	1	173.821	0.996214
144.71	0.921062	144.614	1	144.78	0.957776													142.731	0.745654	142.149	0.993972	202.059	0.994149
173	0.954455	173.026	0.993899	173.26	0.972889													170.957	0.759075	170.389	0.974231	230.36	1
201.429	0.979021	201.45	0.988225	201.59	0.988862													199.281	0.745492	198.607	0.958579	258.6	0.985802
229.8	0.988223	229.732	0.971234	229.84	1													227.62	0.746256	226.849	0.928202	286.861	0.98368
258.04	1	257.97	0.952579	258.082	0.996493													256.021	0.739036	255.349	0.891442	315.1	0.970056
286.308	0.996918	286.238	0.928899	286.479	0.996767													284.331	0.727952	283.829	0.85358	343.361	0.967675
314.55	0.987657	314.485	0.902465	314.699	0.983479													312.623	0.710065	312.049	0.821031	371.654	0.95712
342.852	0.982997	342.789	0.873925	342.941	0.965521													340.887	0.678574	340.37	0.784486	399.961	0.934405
371.19	0.966708	371.195	0.85461	371.364	0.94745													369.131	0.651942	368.71	0.751867	428.373	0.910772
399.411	0.948321	399.526	0.813713	399.591	0.917788													397.511	0.627973	396.95	0.706229	456.619	0.895514
427.661	0.92602	427.818	0.775971	427.841	0.898288													425.911	0.602176	425.19	0.67272	484.853	0.864569
455.911	0.933314	456.082	0.744581	456.063	0.872963													454.14	0.577513	453.431	0.621408	513.185	0.838845
484.222	0.901486	484.369	0.711248	484.382	0.843623													482.386	0.552874	481.81	0.572055	541.396	0.817393
512.532	0.884694	512.609	0.673838	512.783	0.817872													510.648	0.5104	510.397	0.515743	569.712	0.792157
541.002	0.850293	540.879	0.635075	541.024	0.787857													538.859	0.487105	538.797	0.484467	nan	nan
569.401	0.82484	569.198	0.600041	569.284	0.759191													567.111	0.457472	567.179	0.444904	31.856	0.891284
nan	nan	nan	nan	nan	nan													nan	nan	nan	nan	60.087	0.933629
30.322	0.747532	32.515	0.905151	31.571	0.64229													30.468	1	31.903	0.942773	88.353	0.968672
58.718	0.843991	60.818	0.972147	59.815	0.7407													58.804	0.837667	60.149	0.970975	116.658	0.980329
87.123	0.908161	89.14	1	88.055	0.809287													87.127	0.858353	88.478	1	145.105	0.997515
115.373	0.952051	117.362	0.977575	116.455	0.853043													115.437	0.898848	116.798	0.991832	173.454	0.992752
143.616	0.97671	145.603	0.911846	144.795	0.910958													143.684	0.922934	145.139	0.983198	201.755	0.99972
171.86	0.995736	173.864	0.848656	173.102	0.948812													171.928	0.92563	173.419	0.972002	229.999	1
200.18	1	202.108	0.755124	201.332	0.967589													200.218	0.928091	201.739	0.945426	258.237	0.998599
228.545	0.996971	230.569	0.651537	229.583	0.982194													228.547	0.940984	229.959	0.917936	286.486	0.991537
256.873	0.988241	258.97	0.545106	257.823	0.990189													256.884	0.94116	258.199	0.895791	314.737	0.967925
285.193	0.978351	287.356	0.446524	286.059	1													285.249	0.926861	286.459	0.866302	343.037	0.964413
313.439	0.960815	315.6	0.350206	314.313	0.991941													313.497	0.918773	314.699	0.845019	371.507	0.948572
341.821	0.936665	343.868	0.267121	342.624	0.986812													341.818	0.903243	342.919	0.829416	399.879	0.944276
370.223	0.917203	372.27	0.203207	371.013	0.986016													370.158	0.87189	371.16	0.790663	428.143	0.93206
398.474	0.893124	400.656	0.161035	399.324	0.957524													398.399	0.864799	399.582	0.762861	456.567	0.932004
426.718	0.861943	428.899	0.135416	427.754	0.934097													426.627	0.837374	427.988	0.739824	484.946	0.915304
455.042	0.832635	457.12	0.111658	456.045	0.910831													454.927	0.798404	456.208	0.696705	513.199	0.899166
483.285	0.799313	485.52	0.0963338	484.282	0.880463													483.251	0.777249	484.528	0.673147	541.434	0.878825
511.596	0.781736	513.78	0.0806539	512.615	0.836976													511.518	0.737811	512.868	0.626427	569.752	0.858168
539.841	0.763898	542.076	0.0696068	540.854	0.805832													539.907	0.697378	541.158	0.596222	nan	nan
568.072	0.740237	570.419	0.0566988	569.185	0.76025													568.318	0.678393	569.398	0.555577	30.06	0.914216
nan	nan	nan	nan	nan	nan													nan	nan	nan	nan	58.319	0.957278
30.961	0.719826	31.602	0.755464	31.821	0.708758													31.847	1	30.681	0.881425	86.642	0.985935
59.192	0.801532	59.862	0.839852	60.129	0.807381													60.15	0.77286	58.967	0.933842	114.95	0.99399
87.433	0.862633	88.182	0.88864	88.389	0.887723													88.482	0.792687	87.367	0.965907	143.185	1
115.683	0.91146	116.642	0.933227	116.609	0.929353													116.866	0.826446	115.633	0.988823	171.611	0.996282
143.898	0.950095	145.034	0.956449	144.869	0.9674													145.117	0.848411	143.917	0.996199	199.984	0.970754
172.164	0.9676	173.3	0.96646	173.109	0.995321													173.36	0.858559	172.157	0.989133	228.312	0.952631
200.464	0.993226	201.62	0.982541	201.489	0.996922													201.664	0.864137	200.417	1	256.724	0.933299
228.883	0.999806	230.019	0.993531	229.729	1													229.947	0.870599	228.657	0.995805	284.943	0.892067
257.109	1	258.301	0.998043	257.969	0.989949													258.35	0.857281	256.897	0.982517	313.196	0.87602
285.332	0.992619	286.541	1	286.309	0.985023													286.721	0.862097	285.217	0.988119	341.436	0.851331
313.593	0.991563	314.781	0.995934	314.629	0.971386													315.096	0.858608	313.595	0.969229	369.785	0.823545
341.834	0.973766	343.031	0.994823	342.849	0.956641													343.499	0.859763	341.855	0.937304	398.056	0.776958
370.056	0.95103	371.561	0.98995	371.121	0.945406													371.76	0.832907	370.097	0.926635	426.376	0.749824
398.301	0.934121	399.921	0.982835	399.427	0.906883													400.049	0.827846	398.397	0.894177	454.778	0.706894
426.644	0.909397	428.301	0.967638	427.748	0.878751													428.382	0.801188	426.637	0.850404	483.184	0.666692
455.013	0.885753	456.65	0.956591	455.988	0.845927													456.631	0.784506	454.897	0.826224	511.589	0.621412
483.262	0.847912	484.96	0.932477	484.388	0.814629													484.842	0.762591	483.217	0.777387	539.819	0.584031
511.585	0.817647	513.28	0.925582	512.678	0.781054													513.099	0.737482	511.437	0.735307	568.058	0.535626
539.893	0.778695	541.5	0.896313	540.938	0.733774													541.461	0.714856	539.757	0.695735	nan	nan
568.142	0.745899	569.741	0.885402	569.158	0.696128													569.756	0.679849	568.177	0.648536	31.359	0.799476
nan	nan	nan	nan	nan	nan													nan	nan	nan	nan	59.65	0.851614
29.35	0.743543	32.081	0.650946	31.116	0.605609													31.363	1			88.07	0.908782
57.592	0.828234	60.301	0.737301	59.437	0.741408													59.583	0.691926			116.4	0.945142
85.984	0.894768	88.581	0.808963	87.677	0.837579													87.903	0.706443			144.72	0.962252
114.304	0.93998	116.872	0.863452	115.917	0.904815													116.163	0.718343			173.003	0.98971
142.544	0.959982	145.272	0.896934	144.158	0.950247													144.532	0.739945			201.243	0.9963
170.864	0.987591	173.593	0.933879	172.498	0.979068													172.851	0.739596			229.489	1
199.111	0.995985	201.833	0.953184	200.898	0.993437													201.097	0.733628			257.762	0.99526
227.363	0.9944	230.242	0.978322	229.216	0.999606													229.357	0.711573			286.062	0.976819
255.614	1	258.482	0.98542	257.537	1													257.566	0.696637			314.464	0.95572
283.901	0.992308	286.863	0.98838	285.938	0.995301													285.913	0.682364			342.952	0.917222
312.223	0.972148	315.123	1	314.254	0.982514													314.161	0.639302			371.496	0.895372
340.631	0.951009	343.37	0.987629	342.557	0.969519													342.497	0.622238			399.753	0.861903
368.872	0.929907	371.762	0.974817	370.805	0.951297													370.79	0.597916			428.064	0.827221
397.102	0.911237	400.152	0.971607	399.046	0.930451													399.176	0.560719			456.285	0.776529
425.433	0.880186	428.532	0.947721	427.446	0.91335													427.584	0.54083			484.536	0.737109
453.682	0.851665	456.772	0.920022	455.774	0.889112													455.997	0.491109			512.766	0.70977
482.002	0.813594	485.032	0.915045	484.085	0.86205													484.203	0.43968			541.006	0.65804
510.244	0.776531	513.339	0.887216	512.326	0.840816													512.54	0.414733			569.256	0.626483
538.564	0.704431	541.652	0.859594	540.647	0.817175													540.94	0.383054			nan	nan
566.956	0.635896	569.901	0.823347	568.888	0.793209													569.191	0.357202			31.08	0.804704
nan	nan	nan	nan	nan	nan													nan	nan			59.32	0.869636
31.22	0.622557	31.641	0.784976	28.639	0.742673													32.32	1			87.542	0.903544
59.46	0.708667	59.954	0.874255	56.87	0.830333													60.58	0.772141			115.883	0.920341
87.672	0.782674	88.434	0.930183	85.129	0.903095													88.9	0.808314			144.18	0.949437
115.953	0.848287	116.795	0.969561	113.491	0.949391													117.24	0.846924			172.552	0.974035
144.239	0.903978	145.061	0.986701	141.819	0.974169													145.52	0.865485			200.811	0.977462
172.774	0.937722	173.354	1	170.072	0.991115													173.94	0.892592			229.051	0.988626
201.145	0.963361	201.615	0.99943	198.321	1													202.22	0.897925			257.294	0.994534
229.537	0.982648	229.872	0.998182	226.782	0.997293													230.56	0.905043			285.544	0.988436
257.864	0.994011	258.177	0.99255	255.042	0.997508													259.04	0.903301			313.813	0.978135
286.171	0.998406	286.418	0.975641	283.281	0.989864													287.28	0.900004			342.103	1
314.425	1	314.825	0.954363	311.591	0.978501													315.5	0.910734			370.343	0.989803
342.736	0.983946	343.193	0.941445	339.852	0.963187													343.78	0.895952			398.683	0.984841
370.955	0.9668	371.434	0.92021	368.154	0.942527													372.07	0.894881			426.973	0.978429
399.218	0.94658	399.754	0.896099	396.419	0.924715													400.39	0.879385			455.288	0.96531
427.477	0.932257	428.094	0.871161	424.696	0.905749													428.65	0.869516			483.563	0.955113
455.818	0.895576	456.323	0.844679	452.955	0.884633													457.017	0.841864			511.864	0.950846
484.18	0.863132	484.564	0.810546	481.206	0.862863													485.278	0.834894			540.147	0.926354
512.561	0.820079	512.835	0.773771	509.684	0.837661													513.519	0.819			568.44	0.917461
540.962	0.779646	541.115	0.736415	537.995	0.818434													541.763	0.79135			nan	nan
569.198	0.732682	569.617	0.68116	566.405	0.7965													570.006	0.762148
nan	nan	nan	nan	nan	nan													nan	nan
32.083	0.737014			32.161	0.58827
60.324	0.827994			60.541	0.701874
88.654	0.903794			88.861	0.789431
116.971	0.945617			117.121	0.857241
145.294	0.97548			145.419	0.908762
173.682	0.990205			173.811	0.940155
201.924	1			202.039	0.961982
230.143	0.992873			230.312	0.980209
258.488	0.981581			258.772	0.987501
286.883	0.969622			287.022	0.998098
315.133	0.949148			315.241	1
343.443	0.923062			343.522	0.99449
371.654	0.884738			371.813	0.990492
399.996	0.852478			400.064	0.987973
428.374	0.815643			428.389	0.97866
456.774	0.778375			456.774	0.968353
485.046	0.740054			485.024	0.957505
513.346	0.687133			513.253	0.950882
541.756	0.647922			541.565	0.944247
570.069	0.596764			569.815	0.927086
nan	nan			nan	nan
30.882	0.751758			30.099	0.717208
59.168	0.841829			58.49	0.794274
87.591	0.903869			86.891	0.852822
116	0.950938			115.189	0.898815
144.382	0.975241			143.522	0.939275
172.6	0.990479			171.745	0.968069
200.853	0.997305			200	0.984305
229.182	1			228.23	0.991879
257.51	0.985505			256.65	0.996661
285.72	0.979477			285.062	1
313.972	0.962717			313.539	0.996406
342.213	0.93922			341.984	0.982815
370.53	0.917542			370.224	0.975058
398.951	0.886482			398.564	0.962524
427.252	0.854965			426.894	0.944513
455.581	0.830741			455.186	0.921653
483.884	0.785032			483.436	0.896826
512.134	0.749467			511.695	0.865532
540.472	0.707426			540.073	0.83037
568.754	0.66882			568.484	0.791919
nan	nan			nan	nan
30.667	0.698928			31.579	0.823392
58.989	0.794188			59.83	0.865623
87.298	0.857631			88.119	0.896216
115.519	0.924894			116.45	0.925595
143.789	0.95333			144.7	0.955807
172.078	0.97261			173	0.984756
200.479	0.984681			201.251	0.9909
228.739	1			229.481	0.997914
256.989	0.993399			257.83	0.999466
285.307	0.984513			286.122	1
313.62	0.971813			314.451	0.982496
341.86	0.942685			342.776	0.967488
370.082	0.920766			371.163	0.944537
398.342	0.895452			399.413	0.922492
426.642	0.841435			427.663	0.895596
455.036	0.816606			455.954	0.862198
483.455	0.779857			484.202	0.830118
511.862	0.731064			512.471	0.797805
540.262	0.675905			540.794	0.761449
568.663	0.630449			569.086	0.726622
nan	nan			nan	nan
31.867	0.610718			31.371	0.9181
60.108	0.700989			59.672	0.959891
88.428	0.775697			88.081	0.985691
116.728	0.84736			116.316	0.999074
145.128	0.895421			144.542	1
173.388	0.936209			172.78	0.995869
201.708	0.955956			201.022	0.975652
230.096	0.989721			229.293	0.955675
258.336	0.993962			257.625	0.93135
286.556	1			285.992	0.898996
314.876	0.988499			314.295	0.867077
343.115	0.993099			342.545	0.829549
371.436	0.999605			370.795	0.792528
399.776	0.987744			399.207	0.751992
428.176	0.978921			427.663	0.714941
456.396	0.966774			455.926	0.676424
484.756	0.950062			484.175	0.638715
513.107	0.937305			512.466	0.605305
541.347	0.927656			540.753	0.572266
569.607	0.907999			569.047	0.539912
nan	nan			nan	nan
29.841	0.721479			31.68	0.819782
58.062	0.809636			60.06	0.895252
86.332	0.867739			88.316	0.941491
114.599	0.924564			116.569	0.969841
142.892	0.958719			144.86	0.986245
171.292	0.973094			173.278	0.998614
199.576	1			201.648	1
227.826	0.993147			229.9	0.993752
256.076	0.997215			258.229	0.979701
284.332	0.995624			286.478	0.961816
312.618	0.980453			314.777	0.941546
340.856	0.963456			343.089	0.92076
369.127	0.938088			371.36	0.889325
397.516	0.905887			399.652	0.864874
425.837	0.876942			427.966	0.82465
454.072	0.831347			456.305	0.786231
482.318	0.780478			484.613	0.738089
510.649	0.729324			512.98	0.682657
539.019	0.672914			541.249	0.630248
567.255	0.620828			569.51	0.568957
nan	nan			nan	nan
31.181	0.732949			31.459	0.665363
59.412	0.815705			59.849	0.775382
87.792	0.889045			88.079	0.859386
116.073	0.935863			116.313	0.910488
144.459	0.967622			144.583	0.948516
172.71	0.984964			173.061	0.970225
200.921	0.992325			201.372	0.980827
229.258	1			229.705	0.991374
257.592	0.990653			258.003	0.992924
285.892	0.974682			286.328	0.992272
314.132	0.962227			314.58	1
342.382	0.93839			342.9	0.990322
370.712	0.913058			371.182	0.977272
399.022	0.885931			399.532	0.972973
427.263	0.856495			427.753	0.955913
455.593	0.821504			456.065	0.947892
483.972	0.78609			484.374	0.934262
512.203	0.747716			512.702	0.92601
540.458	0.720881			541.122	0.907628
568.674	0.685109			569.365	0.8906
nan	nan			nan	nan
30.408	0.763652			31.386	0.70535
58.808	0.839838			59.749	0.806926
87.048	0.899743			88.01	0.879
115.288	0.944503			116.24	0.927655
143.529	0.980477			144.5	0.953124
171.85	0.994955			172.73	0.982689
200.251	0.996063			201.139	0.9953
228.632	1			229.44	1
257.113	0.997188			257.692	0.989869
285.338	0.997911			285.939	0.976268
313.659	0.966836			314.232	0.960087
342	0.953388			342.48	0.946263
370.242	0.937128			370.725	0.915864
398.463	0.92532			399.11	0.895631
426.789	0.901446			427.531	0.860772
455.11	0.88416			455.777	0.831307
483.441	0.855661			484.071	0.793118
511.686	0.826152			512.306	0.758279
539.981	0.797415			540.541	0.717623
568.31	0.751205			568.829	0.673694
nan	nan			nan	nan
28.711	0.660793			30.562	0.702587
56.952	0.756561			58.782	0.811888
85.192	0.824966			87.022	0.884501
113.434	0.884976			115.282	0.936222
141.675	0.924748			143.523	0.973373
169.996	0.955209			171.767	0.990896
198.398	0.971446			200.251	0.998377
226.705	0.974683			228.651	0.997893
254.946	0.990646			256.971	1
283.266	0.993828			285.28	0.981617
311.511	1			313.6	0.97073
339.752	0.99691			341.841	0.94191
368.044	0.992667			370.149	0.915913
396.392	0.985782			398.43	0.874565
424.712	0.981064			426.69	0.833217
453.093	0.963675			455.01	0.805366
481.413	0.959908			483.35	0.772596
509.673	0.938269			511.67	0.74206
538.073	0.926997			539.89	0.710449
566.373	0.907142			568.163	0.668613
nan	nan			nan	nan
32.401	0.738427			30.383	0.768246
60.723	0.825625			58.643	0.878622
89.123	0.899855			86.879	0.943398
117.443	0.939637			115.215	0.98781
145.741	0.984915			143.592	1
173.981	0.983447			171.906	0.996855
202.221	1			200.132	0.979353
230.478	0.990101			228.382	0.947979
258.782	0.970043			256.63	0.914617
287.103	0.957421			284.883	0.858555
315.363	0.920149			313.17	0.808123
343.643	0.89216			341.551	0.754709
371.993	0.846982			369.92	0.69756
400.239	0.800433			398.303	0.652035
428.543	0.763427			426.553	0.606294
456.863	0.717498			454.883	0.564796
485.083	0.671525			483.175	0.521765
513.323	0.623683			511.484	0.480009
541.643	0.584721			539.755	0.436325
569.883	0.546802			568.052	0.399027
nan	nan			nan	nan
31.402	0.708208			31.574	0.784183
59.662	0.789589			59.903	0.880098
87.902	0.851491			88.325	0.948739
116.162	0.895809			116.615	0.996725
144.562	0.929188			144.953	1
172.802	0.955962			173.205	0.989839
201.022	0.974064			201.496	0.97545
229.271	0.984152			229.825	0.936177
257.531	0.990302			258.073	0.913197
285.904	0.995775			286.458	0.874304
314.144	1			314.864	0.826286
342.464	0.992184			343.115	0.775394
370.884	0.982677			371.407	0.729545
399.124	0.978384			399.788	0.660171
427.37	0.96225			428.074	0.609608
455.691	0.950741			456.366	0.547585
483.972	0.937566			484.619	0.476742
512.46	0.913734			512.88	0.422246
540.782	0.8973			541.249	0.363233
569.102	0.871486			569.5	0.321097
nan	nan			nan	nan
30.64	0.661076			30.78	0.629881
58.889	0.755907			59.123	0.745404
87.129	0.834053			87.524	0.846443
115.389	0.890229			115.985	0.905763
143.669	0.927298			144.387	0.943319
171.929	0.958466			172.607	0.98421
200.249	0.974875			200.881	0.990689
228.549	0.989149			229.202	0.993854
256.797	1			257.509	1
285.137	0.994427			285.9	0.973033
313.377	0.991741			314.21	0.970285
341.679	0.984855			342.64	0.955245
369.939	0.963931			370.93	0.924033
398.279	0.94317			399.18	0.905763
426.559	0.925885			427.427	0.875353
454.899	0.902449			455.68	0.842047
483.219	0.875908			484.073	0.79384
511.619	0.840299			512.39	0.74254
540	0.810525			540.68	0.693908
568.24	0.776265			569.093	0.639853
nan	nan			nan	nan
32.08	0.685277			30.32	0.846944
60.301	0.785323			58.64	0.914394
88.621	0.860337			86.991	0.966242
116.861	0.904038			115.279	0.989829
145.281	0.944928			143.619	1
173.498	0.970971			171.859	0.992274
201.759	0.990815			200.081	0.986938
230.001	1			228.362	0.973666
258.381	0.990834			256.649	0.94925
286.641	0.991236			285.059	0.914594
314.961	0.980079			313.459	0.882751
343.261	0.954265			341.679	0.84192
371.501	0.90928			369.92	0.787019
399.761	0.85102			398.179	0.730341
428.001	0.820141			426.419	0.674511
456.381	0.760492			454.64	0.611893
484.719	0.709283			482.88	0.5508
513.041	0.649452			511.3	0.481748
541.341	0.592265			539.54	0.430204
569.582	0.529824			567.76	0.387362
nan	nan			nan	nan
30.9	0.501603
59.141	0.586971
87.461	0.666952
115.761	0.728947
144.001	0.785484
172.282	0.835538
200.562	0.877064
228.962	0.90635
257.202	0.935147
285.448	0.943202
313.848	0.967209
342.09	0.976152
370.33	0.988827
398.571	0.991845
426.931	0.993533
455.211	0.994962
483.431	1
511.672	0.984934
539.932	0.975819
568.178	0.972703
nan	nan
30.65	0.590403
58.952	0.696731
87.192	0.789323
115.441	0.84656
143.683	0.907095
172.008	0.951106
200.371	0.991223
228.774	0.990452
257.042	1
285.33	0.994734
313.65	0.981975
341.892	0.937749
370.133	0.902386
398.58	0.883377
426.883	0.851826
455.17	0.814067
483.574	0.779905
511.981	0.721302
540.402	0.668436
568.77	0.597552
nan	nan
32.316	0.741655
60.636	0.828788
88.876	0.883726
117.116	0.926285
145.436	0.959204
173.658	0.977601
201.898	0.986105
230.21	1
258.492	0.992223
286.953	0.997167
315.358	0.984897
343.601	0.972069
372.009	0.949666
400.39	0.93212
428.63	0.90979
456.95	0.877311
485.21	0.845295
513.491	0.805784
541.751	0.772105
569.991	0.728092
nan	nan
31.813	0.64134
60.053	0.72745
88.466	0.800868
116.715	0.853552
144.959	0.890031
173.206	0.918734
201.562	0.952378
229.927	0.962659
258.376	0.98082
286.79	0.990979
315.017	0.99364
343.344	1
371.567	0.994909
399.816	0.992348
428.077	0.982326
456.397	0.982273
484.717	0.976135
513.042	0.968567
541.326	0.959976
569.565	0.956398
nan	nan
31.681	0.599122
59.994	0.682943
88.394	0.752769
116.654	0.797679
144.941	0.842795
173.202	0.8776
201.442	0.908612
229.664	0.93788
257.904	0.953078
286.304	0.970695
314.564	0.978973
342.804	0.986262
371.186	0.99514
399.431	0.997013
427.692	0.992647
455.98	1
484.322	0.985368
512.73	0.984148
541.131	0.97364
569.451	0.969254
nan	nan
30.161	0.744729
58.46	0.831962
86.86	0.89048
115.101	0.948852
143.362	0.96873
171.662	0.991608
199.894	1
228.234	0.998949
256.602	0.987629
285.092	0.969487
313.422	0.94668
341.722	0.924589
369.984	0.894458
398.305	0.883183
426.544	0.84108
454.765	0.810674
483.007	0.791081
511.248	0.746101
539.587	0.718908
567.965	0.677896
nan	nan
31.127	0.692526
59.389	0.789487
87.71	0.869766
116.01	0.936636
144.41	0.980542
172.652	1
200.892	0.992942
229.219	0.98062
257.459	0.998791
285.785	0.978125
314.088	0.960812
342.329	0.933673
370.71	0.92486
399.11	0.882477
427.37	0.868206
455.692	0.826487
484.077	0.782508
512.318	0.735333
540.578	0.694983
568.898	0.649175
nan	nan
28.601	0.650656
56.843	0.776954
85.243	0.861799
113.643	0.87974
141.883	0.983431
170.123	0.98973
198.598	0.995427
226.838	0.983044
255.099	1
283.341	0.991067
311.563	0.967104
339.963	0.949146
368.366	0.92199
396.607	0.886545
424.867	0.852962
453.187	0.816587
481.507	0.77273
509.807	0.714014
538.047	0.657912
566.444	0.598302
nan	nan
30.482	0.658993
58.802	0.76841
87.103	0.840434
115.349	0.885227
143.573	0.929013
171.973	0.962692
200.397	0.990426
228.637	1
256.857	0.997639
285.097	0.99253
313.442	0.961898
341.722	0.960266
369.982	0.925772
398.222	0.89686
426.602	0.863206
454.842	0.83612
483.105	0.808091
511.507	0.773518
539.753	0.752444
567.993	0.725491
nan	nan
30.806	0.701009
59.046	0.797303
87.286	0.871032
115.546	0.924755
143.846	0.957152
172.092	0.975672
200.472	0.993325
228.792	0.999106
257.216	1
285.456	0.993139
313.676	0.983586
341.997	0.977416
370.412	0.951921
398.652	0.930871
426.872	0.898459
455.16	0.866678
483.446	0.828927
511.77	0.80171
539.992	0.775008
568.232	0.744531
nan	nan
31.035	0.697582
59.275	0.790542
87.518	0.860066
115.73	0.921322
144.058	0.96222
172.308	0.971397
200.555	0.984623
229.039	0.993295
257.32	1
285.587	0.988151
313.913	0.994069
342.216	0.963737
370.54	0.949388
398.928	0.923753
427.336	0.902476
455.559	0.869495
483.906	0.844722
512.208	0.814203
540.45	0.781353
568.713	0.750501
nan	nan
32.207	0.704483
60.447	0.792939
88.687	0.853331
116.991	0.901898
145.22	0.930515
173.585	0.962762
201.887	0.985243
230.171	0.99636
258.601	1
287.009	0.989514
315.401	0.991792
343.646	0.979202
371.952	0.963108
400.169	0.942287
428.518	0.923757
456.808	0.903569
485.081	0.875039
513.371	0.84546
541.699	0.807529
569.94	0.764206
nan	nan
31.599	0.639919
59.882	0.687389
88.262	0.725748
116.582	0.765997
144.973	0.812277
173.228	0.847811
201.547	0.868663
229.911	0.911956
258.165	0.924523
286.413	0.934513
314.663	0.95882
342.883	0.955804
371.206	0.965656
399.615	0.975462
428.019	0.976705
456.42	0.986557
484.739	0.974035
513.126	0.987754
541.429	0.995258
569.683	1
nan	nan
29.681	0.644071
58.021	0.743923
86.319	0.821591
114.709	0.881114
143.118	0.922691
171.432	0.953024
199.638	0.968045
227.899	0.980973
256.149	0.985868
284.372	0.986918
312.632	0.990012
340.936	0.986173
369.353	0.993901
397.636	0.995493
425.878	1
454.21	0.998689
482.453	0.995837
510.779	0.988236
539.022	0.977497
567.289	0.968917
nan	nan
29.931	0.719057
58.348	0.788426
86.632	0.846425
114.954	0.889924
143.207	0.933183
171.45	0.953342
199.833	0.978029
228.238	0.99039
256.759	1
285.132	0.990978
313.538	0.981069
341.859	0.957548
370.168	0.938982
398.41	0.91725
426.654	0.890459
454.898	0.880092
483.188	0.855037
511.519	0.845173
539.93	0.820505
568.228	0.806353
nan	nan
32.181	0.836563
60.421	0.934344
88.641	0.967295
116.961	0.993484
145.361	1
173.624	0.988578
201.92	0.976462
230.34	0.967518
258.58	0.953396
286.8	0.958005
315.04	0.934493
343.38	0.928175
371.623	0.914921
399.865	0.898198
428.267	0.8844
456.649	0.872087
484.889	0.856233
513.138	0.821725
541.359	0.793708
569.679	0.762052
nan	nan
30.08	0.687515
58.46	0.769299
86.701	0.844545
114.961	0.89883
143.281	0.941355
171.581	0.961604
199.822	0.979123
228.082	0.983696
256.402	0.996892
284.792	1
313.032	0.990752
341.273	0.974987
369.573	0.965677
397.813	0.946067
426.073	0.929928
454.313	0.907901
482.774	0.870816
511.174	0.841852
539.514	0.811386
567.811	0.77977
nan	nan
30.45	0.70754
58.77	0.787218
87.17	0.844374
115.41	0.903146
143.65	0.939025
171.979	0.966321
200.269	0.991268
228.564	0.993029
256.859	0.996405
285.23	1
313.48	0.974245
341.73	0.960524
370.059	0.927139
398.361	0.907695
426.612	0.857948
455.022	0.808863
483.317	0.732705
511.56	0.651194
539.943	0.540486
568.193	0.458687
nan	nan
32.292	0.559955
60.532	0.628054
88.792	0.690623
117.033	0.744468
145.273	0.787285
173.493	0.826434
201.733	0.856259
229.993	0.881917
258.313	0.908548
286.613	0.921011
314.871	0.937046
343.112	0.959988
371.352	0.970706
399.592	0.973246
428.052	0.985809
456.532	1
484.792	0.997519
513.032	0.997023
541.252	0.990711
569.492	0.990692
nan	nan
30.842	0.602416
59.102	0.674983
87.503	0.730825
115.723	0.785501
143.963	0.817139
172.283	0.860981
200.543	0.890113
228.863	0.912109
257.123	0.920976
285.403	0.949842
313.743	0.961315
342.143	0.963483
370.363	0.97067
398.724	0.975688
426.995	0.982022
455.235	0.97883
483.483	0.983654
511.723	0.98151
540.043	1
568.303	0.994275
nan	nan

## Sheet: Figure 5
U 3-isotope plots
																	Certified Values: CRM U900 (2σ uncertainties)
																	234U/238U	234U/238U_er	235U/238U	235U/238U_er	236U/238U	236U/238U_er
	Graphite: O-																0.0894628	0.000191188	10.3757	0.00963204	0.0382722	0.000120306
	Isotope Ratios										Ratio Covariances (1σ)
	234U/238U	234U/238U_er	235U/238U	235U/238U_er	236U/238U	236U/238U_er	238U 1H/238U	238U 1H/238U_er			cov234U/238U	cov235U/238U	cov235U/234U	rho235U/234U			Δ[234U/238U]	Δ[234U/238U]_er	Δ[235U/238U]	Δ[235U/238U]_er	Δ[236U/238U]	Δ[236U/238U]_er
	0.0904041	0.000430939	10.4609	0.0189307	0.0380386	0.000451547	0.00125773	4.26138e-05			9.71243e-08	0.000214381	1.44537e-06	0.316755			0.0105222	0.0052789	0.00820798	0.00205058	-0.00610338	0.012205
	0.0902317	0.000145542	10.4598	0.0117582	0.0383136	0.000314257	0.00137269	3.93354e-05			3.40659e-08	7.56993e-05	5.07708e-07	0.316161			0.00859503	0.00270047	0.00810174	0.00146971	0.0010823	0.00879345
	0.0900726	0.000238151	10.4441	0.0150765	0.0380613	0.000296783	0.000936154	2.84667e-05			5.63394e-08	0.000124774	8.38132e-07	0.316115			0.00681652	0.00342284	0.00658892	0.00172759	-0.00550969	0.00836095
	0.0901566	0.000195344	10.465	0.0142179	0.0384585	0.000381373	0.00100745	3.28107e-05			4.12954e-08	9.18347e-05	6.15772e-07	0.316203			0.00775509	0.00306691	0.00861063	0.00165965	0.00486787	0.0104534
	0.0904458	0.000229936	10.4562	0.0100877	0.0388259	0.000346199	0.00122792	4.12615e-05			3.79498e-08	8.40206e-05	5.65344e-07	0.316603			0.0109876	0.00335765	0.00776062	0.00134925	0.0144686	0.00959134
	0.0900249	0.000263762	10.4514	0.0155326	0.038612	0.00051356	0.0010533	3.55541e-05			6.48533e-08	0.000143753	9.64891e-07	0.316012			0.00628294	0.00364925	0.00729623	0.00176507	0.00887954	0.0137883
	0.0904189	0.000267718	10.4456	0.0188269	0.0380907	0.000399413	0.000762645	2.00545e-05			7.6977e-08	0.00016953	1.14388e-06	0.316648			0.0106875	0.00369057	0.00674024	0.00204106	-0.00474272	0.010895
	0.0902324	0.000292241	10.4483	0.0189464	0.0389083	0.000335203	0.00105732	3.39012e-05			4.62991e-08	0.000102575	6.89667e-07	0.31647			0.00860206	0.00391366	0.00699556	0.00205141	0.016621	0.0093232
	0.0901734	0.00023504	10.4191	0.0223278	0.0388608	0.000287152	0.000902655	3.18215e-05			4.03391e-08	8.90245e-05	5.99077e-07	0.316129			0.0079433	0.00339739	0.00417931	0.00234517	0.0153793	0.00815359
	0.0906083	0.00027285	10.4595	0.0145261	0.0381789	0.000378407	0.000832831	3.11877e-05			5.69564e-08	0.000125697	8.48506e-07	0.317118			0.0128048	0.00373985	0.00807783	0.00168398	-0.0024361	0.0103726
	0.0907771	0.000289562	10.4373	0.0201955	0.0384703	0.000403225	0.000773568	3.41339e-05			1.19505e-07	0.000261329	1.77276e-06	0.317221			0.0146906	0.00389593	0.00593733	0.00215884	0.00517727	0.0109993
	0.0902565	0.00018151	10.4463	0.013082	0.0383768	0.00028391	0.00081349	3.38711e-05			4.35118e-08	9.62785e-05	6.47286e-07	0.316248			0.00887163	0.00296055	0.00680058	0.00156947	0.00273325	0.00806007
	0.0902851	0.00038848	10.4491	0.0153508	0.0385174	0.000275809	0.000932868	4.38281e-05			7.58717e-08	0.000167587	1.12895e-06	0.316603			0.00919136	0.00484846	0.00707453	0.00175012	0.00640779	0.00787032
	0.0910163	0.000306201	10.5088	0.0211977	0.0380884	0.000417138	0.000722307	4.06221e-05			1.47601e-07	0.000324692	2.19563e-06	0.317161			0.0173652	0.00405483	0.0128296	0.00224899	-0.00480239	0.0113393
	0.0898337	0.000332625	10.4297	0.016412	0.0383929	0.000337163	0.000945654	4.32881e-05			6.57539e-08	0.000145663	9.77456e-07	0.315836			0.004146	0.00429287	0.00520278	0.00183651	0.00315428	0.00935697
	0.0904358	0.000258392	10.4613	0.0151913	0.0386546	0.000273528	0.000839188	4.56466e-05			7.3704e-08	0.000162831	1.09762e-06	0.316839			0.0108758	0.0036068	0.00824878	0.00173773	0.00999262	0.00782037
	0.0904399	0.000342586	10.4309	0.0197396	0.0397082	0.000425501	0.000745593	3.27283e-05			1.50874e-07	0.000330902	2.23837e-06	0.316793			0.0109224	0.00439675	0.00531599	0.00211906	0.037521	0.0115862
	0.0903003	0.000257604	10.4489	0.0149022	0.0385197	0.000374803	0.000804595	5.69418e-05			6.81355e-08	0.00015054	1.01407e-06	0.316632			0.00936104	0.00359781	0.00705013	0.00171371	0.00646784	0.0102915
	0.0903211	0.000226656	10.4508	0.0103032	0.0383242	0.000224651	0.00072369	1.72251e-05			4.37878e-08	9.69476e-05	6.52156e-07	0.316524			0.00959452	0.00332774	0.00723542	0.00136396	0.00135974	0.00666055
	0.0907911	0.000227196	10.4909	0.0147732	0.0382124	0.000422096	0.000810458	3.73004e-05			7.28424e-08	0.000160911	1.08628e-06	0.31729			0.014848	0.00333962	0.0110983	0.00170538	-0.00156136	0.0114667
	0.0904842	0.00027025	10.5033	0.01399	0.03856	0.00040655	0.0008257	2.8299e-05			6.50806e-08	0.00014468	9.72241e-07	0.316843			0.0114177	0.00371447	0.0122994	0.00164351	0.00752065	0.0110847
																	WM	SEM	WM	SEM	WM	SEM
WM ± sem	0.0903417	6.20237e-05	10.4568	0.0047022	0.0384797	8.08006e-05	0.000874975	4.54705e-05		1σ	3.84694e-09	2.21107e-05	1.98023e-07	0.678979			0.00982463	0.00226669	0.00781471	0.00103957	0.00542342	0.00380077
Neff, 95% CI	16.1746	0.000129393	17.2986	0.012208	17.7355	0.000162071	14.0439	0.000568508		95%	1.67425e-08	0.000149035	1.07253e-06	0.678979			std	0.00298119	std	0.00210201	std	0.00974564
MSWD ± er	0.959896	0.363041	1.50434	0.3503	0.901664	0.345697	33.5161	0.391572									%/amu (individual)
																	0.0024501	0.000565275	0.00259896	0.000345731	0.00270465	0.00189544
																		0.000743459		0.00104827		0.00486013
																	Mean Fractionation: %/amu
																	Frac. (F)	0.00256054	F er	0.000116719	95% CI	0.00023409
																	Neff	32.9497	MSWD	0.969344	MSWD er	0.250197
	Graphite: O2-
	234U/238U	234U/238U_er	235U/238U	235U/238U_er	236U/238U	236U/238U_er	238U 1H/238U	238U 1H/238U_er			cov234U/238U	cov235U/238U	cov235U/234U	rho235U/234U			Δ[234U/238U]	Δ[234U/238U]_er	Δ[235U/238U]	Δ[235U/238U]_er	Δ[236U/238U]	Δ[236U/238U]_er
	0.0904803	0.000533905	10.4346	0.0331307	0.0385092	0.000549299	0.000361414	4.7284e-05			2.88657e-07	0.000631133	4.26962e-06	0.316328			0.0113737	0.00634724	0.00567353	0.00332679	0.00619267	0.0146968
	0.0901727	0.000258828	10.4455	0.0126767	0.0388859	0.000207772	0.000417281	1.43469e-05			3.55921e-08	7.88922e-05	5.29391e-07	0.315924			0.00793496	0.00360695	0.00672885	0.00153823	0.0160365	0.00629862
	0.0898766	0.000226081	10.4171	0.0140288	0.0384746	0.000223953	0.000533041	1.83412e-05			4.64182e-08	0.000102618	6.88639e-07	0.315527			0.00462565	0.00331596	0.0039861	0.00164219	0.00528845	0.00665035
	0.0900929	0.000305857	10.4301	0.0131722	0.0383352	0.000238881	0.000528541	1.69293e-05			5.51698e-08	0.000121781	8.18867e-07	0.315916			0.00704338	0.00403979	0.00523838	0.00157561	0.0016458	0.00699083
	0.0895692	0.000209365	10.4201	0.0110137	0.0382257	0.000172654	0.000442549	1.58616e-05			4.99623e-08	0.000110968	7.42299e-07	0.315252			0.00118916	0.00317091	0.00427926	0.00141278	-0.00121524	0.00549621
	0.0909189	0.000194722	10.4624	0.0114976	0.0382802	0.000267136	0.000601127	2.52371e-05			6.36283e-08	0.000139799	9.46885e-07	0.317483			0.0162756	0.0030748	0.00835977	0.00145059	0.00020896	0.00765533
	0.0902489	0.000232623	10.4587	0.00970876	0.0383932	0.00024166	0.000627949	2.46152e-05			5.35645e-08	0.000118665	7.97602e-07	0.316364			0.0087872	0.0033777	0.00799736	0.00132333	0.00316277	0.00705787
	0.0905663	0.000330839	10.5089	0.01221	0.0386434	0.000310928	0.000620584	1.83851e-05			7.9149e-08	0.000175887	1.18321e-06	0.317118			0.0123347	0.0042844	0.0128404	0.00150629	0.00970057	0.00872211
	0.0905115	0.00024633	10.4604	0.0132202	0.0385057	0.000221864	0.000639564	1.80218e-05			5.8453e-08	0.000129107	8.70515e-07	0.316882			0.0117224	0.00350088	0.00816347	0.00158094	0.00610063	0.0066036
	0.0902711	0.00031369	10.4719	0.013536	0.0384412	0.000341934	0.000597817	2.87431e-05			6.93225e-08	0.000153733	1.03336e-06	0.316542			0.00903546	0.00411638	0.00927117	0.00160617	0.00441637	0.00947575
	0.090039	0.000251089	10.4389	0.0175745	0.0383262	0.000262807	0.000374787	2.07891e-05			7.35821e-08	0.00016266	1.09334e-06	0.31603			0.00644079	0.003536	0.00608907	0.00193425	0.00141203	0.00755394
	0.0884523	0.00146096	10.3124	0.0599784	0.0368093	0.00120645	0.0003513	7.846e-05			2.09433e-06	0.00459546	3.06875e-05	0.312806			-0.0112952	0.0164665	-0.00610111	0.00585383	-0.0382226	0.0316676
	0.0900779	0.000191035	10.4368	0.0124937	0.038663	0.000253563	0.000383492	2.01658e-05			3.42777e-08	7.60168e-05	5.09868e-07	0.315862			0.00687614	0.00303147	0.00588969	0.00152378	0.0102111	0.00734696
	0.0902214	0.000271318	10.4351	0.0154381	0.0383828	0.000280652	0.000439534	2.09192e-05			5.10407e-08	0.000112647	7.58082e-07	0.316153			0.00847958	0.00372054	0.00572251	0.00175657	0.00289152	0.00798199
	0.0904712	0.000300158	10.445	0.0136649	0.038216	0.00038734	0.000475289	2.76091e-05			6.5462e-08	0.000144019	9.71722e-07	0.316474			0.0112723	0.00399092	0.00668	0.00161489	-0.00146647	0.0105962
																	WM	SEM	WM	SEM	WM	SEM
WM ± sem	0.0902198	0.000113241	10.4493	0.00747681	0.0384451	6.74703e-05	0.000500271	2.85649e-05		1σ	1.28235e-08	5.59027e-05	7.32471e-07	0.865109			0.00846151	0.00249938	0.00709204	0.00118039	0.00451821	0.00361642
Neff, 95% CI	11.9856	0.000455171	12.3385	0.0333023	11.5327	0.000147065	11.621	0.000320894		95%	2.07181e-07	0.00110904	1.31135e-05	0.865109			std	0.00608642	std	0.00388945	std	0.0116044
MSWD ± er	3.33403	0.426681	4.12514	0.419989	0.97017	0.435757	25.8248	0.433943									%/amu (individual)
																	0.00211016	0.000623303	0.00235862	0.000392567	0.00225322	0.0018035
																		0.00151785		0.00193966		0.0057871
																	Mean Fractionation: %/amu
																	Frac. (F)	0.00227574	F er	0.000196423	95% CI	0.000609891
																	Neff	21.2042	MSWD	2.21854	MSWD er	0.314626
	Graphite: O3-
Date	234U/238U	234U/238U_er	235U/238U	235U/238U_er	236U/238U	236U/238U_er	238U 1H/238U	238U 1H/238U_er			cov234U/238U	cov235U/238U	cov235U/234U	rho235U/234U			Δ[234U/238U]	Δ[234U/238U]_er	Δ[235U/238U]	Δ[235U/238U]_er	Δ[236U/238U]	Δ[236U/238U]_er
	0.0900229	0.00017566	10.4302	0.0101169	0.0384794	9.55305e-05	0.000270721	1.15953e-05			3.39913e-08	7.53537e-05	5.05337e-07	0.315751			0.00626096	0.002912	0.00525517	0.00134967	0.00541521	0.00402727
	0.0898348	0.000222912	10.4554	0.01325	0.0385054	0.000243989	0.00045241	1.95732e-05			3.87574e-08	8.63934e-05	5.77418e-07	0.315553			0.0041582	0.00328839	0.00768292	0.00158299	0.00609311	0.00711644
	0.0900534	0.000272178	10.4412	0.0107996	0.0384389	0.000190051	0.000425295	1.11894e-05			4.58643e-08	0.000101638	6.82218e-07	0.315978			0.00660145	0.00372606	0.00631452	0.0013986	0.00435594	0.00588441
	0.0898568	0.00020135	10.4444	0.0141401	0.0381749	0.000181448	0.00036311	1.29546e-05			4.18234e-08	9.30152e-05	6.22616e-07	0.31567			0.00440455	0.00311012	0.00662177	0.00165242	-0.002542	0.00568402
	0.0910604	0.000315028	10.4825	0.0132362	0.0386776	0.000239663	0.000399697	1.23788e-05			7.57058e-08	0.000166487	1.12819e-06	0.317779			0.0178583	0.00413901	0.0102899	0.00158336	0.0105921	0.00702175
	0.0902362	0.000199106	10.4189	0.0108995	0.0385355	0.000219376	0.000409981	1.34121e-05			4.04512e-08	8.91694e-05	6.00426e-07	0.316145			0.0086446	0.00309831	0.00416607	0.00140446	0.00688016	0.00654777
	0.0905435	0.000279914	10.422	0.0138552	0.0380684	0.000267955	0.000416401	2.47951e-05			6.76918e-08	0.000148209	1.00265e-06	0.316552			0.01208	0.00380364	0.00446589	0.0016287	-0.00532374	0.00766775
	0.0902538	0.000250731	10.4333	0.0153479	0.0388677	0.000308353	0.000319009	1.53536e-05			6.89661e-08	0.000151925	1.02388e-06	0.316313			0.00884224	0.00353595	0.00554763	0.00174913	0.0155613	0.00866624
	0.0898463	0.000153385	10.395	0.0101266	0.0385149	0.000183663	0.000369799	1.81673e-05			2.94566e-08	6.51268e-05	4.36717e-07	0.315304			0.00428717	0.00274697	0.00185935	0.00134817	0.00634119	0.0057477
	0.0899875	0.000199285	10.4172	0.011192	0.0385153	0.000106856	0.000359173	1.03596e-05			1.94383e-08	4.32348e-05	2.8894e-07	0.315182			0.0058647	0.00309562	0.00399847	0.00142557	0.00635285	0.00421929
	0.0899242	0.000230035	10.4197	0.0114115	0.038351	0.000203912	0.000373259	1.43956e-05			3.29555e-08	7.30641e-05	4.89813e-07	0.315656			0.00515745	0.0033505	0.00424445	0.00144179	0.00205884	0.00618941
	0.0896725	0.000144852	10.3982	0.0101506	0.0385196	0.000154482	0.000300047	9.77261e-06			2.75564e-08	6.11178e-05	4.08758e-07	0.314971			0.00234443	0.00268516	0.00216773	0.00135004	0.00646485	0.00512854
	0.0898612	0.000252274	10.4016	0.0154082	0.0386457	0.000287833	0.000285923	2.38511e-05			9.33492e-08	0.000205393	1.3825e-06	0.315732			0.00445376	0.00354394	0.00249399	0.00175254	0.00976079	0.00816308
	0.0901781	0.000206725	10.4252	0.0109196	0.0385317	0.000200976	0.000323426	1.08791e-05			2.39564e-08	5.31122e-05	3.56121e-07	0.315711			0.00799525	0.0031591	0.0047713	0.00140628	0.00678114	0.00613115
	0.0899505	0.000279493	10.3921	0.0184818	0.0382992	0.000271067	0.00028493	1.69925e-05			7.68586e-08	0.00016846	1.13487e-06	0.315394			0.00545149	0.00379172	0.00158034	0.00200933	0.000704967	0.00774974
	0.0901957	0.000152024	10.4169	0.00867288	0.0386488	0.000173974	0.000318071	1.45789e-05			3.23643e-08	7.14101e-05	4.80078e-07	0.31579			0.00819269	0.00274405	0.00397111	0.00125194	0.00984203	0.00554437
	0.0899741	0.000268784	10.4458	0.0192114	0.0386683	0.000332992	0.000319726	1.28736e-05			8.05851e-08	0.000178098	1.19529e-06	0.315513			0.00571566	0.00369405	0.00675844	0.00207408	0.0103498	0.00926218
	0.089401	0.000405343	10.3625	0.0188515	0.037993	0.000395628	0.000305565	2.9029e-05			1.85184e-07	0.000406145	2.72968e-06	0.314753			-0.000690927	0.00500893	-0.00127057	0.00203978	-0.00729571	0.010798
	0.0895867	0.000308739	10.42	0.0118281	0.0386174	0.000253469	0.000263981	1.21456e-05			5.95109e-08	0.000131808	8.81976e-07	0.314911			0.00138473	0.0040607	0.00426932	0.00147266	0.00902017	0.00734315
	0.0895564	0.000233813	10.4117	0.0126719	0.038215	0.000181965	0.000353483	1.13263e-05			4.22822e-08	9.3757e-05	6.26878e-07	0.314849			0.00104683	0.00337744	0.00346741	0.00153602	-0.0014933	0.0056971
	0.0902704	0.000209408	10.4495	0.00923007	0.0387078	0.000159244	0.000328514	1.09806e-05			3.17661e-08	7.03374e-05	4.71887e-07	0.315692			0.00902711	0.00318259	0.00711096	0.00129052	0.0113814	0.0052364
	0.0909055	0.000177527	10.5269	0.0116225	0.0383849	0.000252098	0.000912285	3.37128e-05			2.51386e-08	5.59561e-05	3.75052e-07	0.316225			0.0161266	0.00294164	0.0145743	0.00146351	0.00294464	0.00730258
	0.090069	0.000236084	10.4377	0.0157422	0.0380583	0.000237643	0.000445458	1.41888e-05			5.07389e-08	0.000112224	7.53756e-07	0.315876			0.00677569	0.00340485	0.00597952	0.0017816	-0.00558863	0.00695171
	0.0901251	0.000249696	10.4093	0.0109378	0.0382483	0.000255292	0.000373311	1.55454e-05			3.72403e-08	8.20876e-05	5.52211e-07	0.315835			0.00740372	0.0035249	0.00323714	0.00140665	-0.000622763	0.00737315
	0.0895159	0.000318394	10.4291	0.0143399	0.0382885	0.000414255	0.000375282	2.36442e-05			1.00695e-07	0.00022348	1.49554e-06	0.315264			0.000594021	0.00415194	0.00514345	0.00166757	0.000427378	0.0112715
	0.089738	0.000161723	10.4102	0.0070576	0.0385429	0.000141845	0.000421138	1.47913e-05			1.93459e-08	4.31205e-05	2.87534e-07	0.314813			0.00307661	0.00280411	0.0033294	0.00115335	0.00707288	0.00487416
	0.0901301	0.0001842	10.4282	0.012728	0.0382031	0.000169712	0.00040201	1.06399e-05			2.55149e-08	5.65831e-05	3.79259e-07	0.315643			0.00745936	0.00297905	0.00505796	0.00154122	-0.0018046	0.00543221
	0.0898727	0.000241967	10.4168	0.0142049	0.0382947	0.00023038	0.000338209	1.56469e-05			5.39317e-08	0.000119171	8.00196e-07	0.315638			0.00458196	0.00345315	0.00396199	0.00165618	0.000589785	0.00679172
	0.0897458	0.000260068	10.4043	0.0145811	0.0386046	0.000349877	0.00047508	2.31126e-05			8.05849e-08	0.000177829	1.19503e-06	0.315682			0.0031637	0.00361202	0.00275968	0.00168566	0.00868698	0.00967606
	0.0899023	0.000214271	10.4013	0.013653	0.0382207	0.000268196	0.000458782	1.47148e-05			6.01785e-08	0.000132578	8.91976e-07	0.315789			0.00491291	0.0032169	0.00246891	0.00161169	-0.00134551	0.00767861
	0.0899468	0.000216519	10.3997	0.0167523	0.0383256	0.000150191	0.000347895	1.75989e-05			5.23006e-08	0.000115159	7.7484e-07	0.315726			0.00540973	0.00323636	0.00231618	0.0018635	0.00139714	0.00503079
	0.0898769	0.00024849	10.4063	0.0119949	0.0379411	0.000228855	0.000460676	2.06033e-05			4.77104e-08	0.000105331	7.0762e-07	0.315658			0.00462864	0.00351061	0.00294739	0.00148436	-0.00865076	0.00674295
	0.089996	0.000219042	10.4032	0.0111624	0.0384381	0.000172538	0.000336579	1.49265e-05			5.29403e-08	0.00011652	7.84189e-07	0.315738			0.00596032	0.00325828	0.00264814	0.00142259	0.00433508	0.00550371
	0.0899214	0.000200968	10.405	0.00911379	0.0383358	0.000163545	0.000424368	1.61942e-05			3.82984e-08	8.45965e-05	5.68139e-07	0.315637			0.0051267	0.0031081	0.00282678	0.00127993	0.00166318	0.00530795
	0.0898991	0.00030091	10.4125	0.0176861	0.038421	0.000201986	0.000431797	1.66447e-05			5.62059e-08	0.000124001	8.33178e-07	0.315598			0.00487666	0.00399061	0.00354789	0.00194254	0.00388853	0.00614909
	0.0902018	0.000247758	10.4008	0.0126464	0.038358	0.000221195	0.000449209	2.83277e-05			4.71945e-08	0.000103685	6.99346e-07	0.316147			0.00826036	0.0035089	0.00241711	0.00153347	0.00224347	0.00658243
	0.0898232	0.000210342	10.3944	0.0154921	0.0384251	0.000163329	0.000402481	1.16743e-05			4.54965e-08	0.000100284	6.73695e-07	0.315397			0.0040292	0.00318307	0.00180387	0.00175906	0.00399579	0.00530776
	0.0895801	0.000334512	10.4001	0.0163451	0.0385651	0.00022562	0.000457017	2.184e-05			5.58525e-08	0.00012346	8.27358e-07	0.315071			0.00131161	0.00430814	0.00235094	0.00182961	0.0076529	0.0066922
	0.0898469	0.000286955	10.3973	0.0121302	0.0383757	0.000136223	0.000291622	9.46029e-06			5.24878e-08	0.000115687	7.77714e-07	0.315608			0.00429337	0.00385936	0.00208268	0.00149405	0.00270597	0.00475432
	0.0900605	0.000233033	10.4167	0.0105744	0.038379	0.000178668	0.000262722	1.08254e-05			5.53185e-08	0.000121836	8.19679e-07	0.315734			0.00668167	0.00337835	0.00395524	0.00138105	0.00279204	0.00563293
	0.0901751	0.00015559	10.4147	0.011652	0.038577	0.000196126	0.000375719	1.35173e-05			4.76391e-08	0.000104798	7.05667e-07	0.315821			0.00796188	0.00276853	0.00375387	0.00145925	0.00796505	0.00602492
	0.0900929	0.000215908	10.435	0.0129749	0.038503	0.000345829	0.000458276	2.41846e-05			6.68792e-08	0.000147782	9.94152e-07	0.316225			0.00704282	0.00323358	0.00571312	0.00156059	0.0060309	0.00957344
	0.0901358	0.000215002	10.4234	0.00943166	0.0386842	0.00021534	0.000423302	1.38608e-05			4.36835e-08	9.64277e-05	6.48552e-07	0.315998			0.00752332	0.00322671	0.00459465	0.00130232	0.0107665	0.00646165
	0.0898634	0.000250443	10.4233	0.0138301	0.0389007	0.000298928	0.000434053	2.28047e-05			5.87308e-08	0.000129878	8.71794e-07	0.315655			0.00447801	0.00352771	0.00459084	0.00162678	0.0164219	0.00843882
	0.0900538	0.00021667	10.4243	0.00846286	0.038525	0.000255111	0.000493687	2.13638e-05			4.63568e-08	0.000102423	6.88382e-07	0.315918			0.00660602	0.00323932	0.00468269	0.00123901	0.00660571	0.0073786
	0.0897265	0.000240104	10.4091	0.0143748	0.0384685	0.000161174	0.000365592	1.83606e-05			5.25818e-08	0.000116219	7.79421e-07	0.315295			0.00294818	0.00343468	0.00321588	0.00166936	0.00512904	0.00526474
	0.090166	0.000195462	10.4289	0.00908353	0.0386017	0.000287058	0.000527443	2.30465e-05			4.9503e-08	0.000109306	7.35538e-07	0.316204			0.00786063	0.00306801	0.00512995	0.00127949	0.00861035	0.008143
																	WM	SEM	WM	SEM	WM	SEM
WM ± sem	0.0900102	4.5463e-05	10.4209	0.00386794	0.0384432	3.1005e-05	0.000364796	1.19676e-05		1σ	2.06689e-09	1.49609e-05	1.23632e-07	0.703061			0.00611871	0.00220938	0.00435434	0.00100413	0.00446782	0.00325975
Neff, 95% CI	39.1474	0.000129602	38.3501	0.0158943	30.8091	5.31575e-05	35.672	0.000118648		95%	1.67966e-08	0.000252629	1.44826e-06	0.703061			std	0.00340416	std	0.00243383	std	0.00540609
MSWD ± er	1.98347	0.228972	4.11564	0.231403	0.704375	0.259024	23.8329	0.240174									%/amu (individual)
																	0.00152591	0.000550983	0.00144814	0.000333947	0.00222809	0.00162563
																		0.00084894		0.00121375		0.00269601
																	Mean Fractionation: %/amu
																	Frac. (F)	0.00146383	F er	9.31204e-05	95% CI	0.000264742
																	Neff	72.2394	MSWD	2.0332	MSWD er	0.167554
	Silicon: O-
	234U/238U	234U/238U_er	235U/238U	235U/238U_er	236U/238U	236U/238U_er	238U 1H/238U	238U 1H/238U_er			cov234U/238U	cov235U/238U	cov235U/234U	rho235U/234U			Δ[234U/238U]	Δ[234U/238U]_er	Δ[235U/238U]	Δ[235U/238U]_er	Δ[236U/238U]	Δ[236U/238U]_er
	0.0915901	0.000400212	10.5151	0.0219949	0.0388829	0.000300402	2.68662e-05	6.54583e-06			1.3674e-07	0.000299331	2.03628e-06	0.318284			0.0237783	0.00497987	0.013433	0.00231923	0.0159569	0.00847393
	0.0912985	0.000346687	10.5572	0.0235295	0.0385301	0.000199734	4.04741e-05	8.08446e-06			6.09921e-08	0.000135143	9.11843e-07	0.317605			0.0205194	0.00444676	0.0174884	0.0024566	0.00673901	0.00610332
	0.0916817	0.000285703	10.5516	0.0226925	0.0388413	0.00013142	8.22287e-05	6.18267e-06			4.08063e-08	9.00569e-05	6.0945e-07	0.317918			0.0248026	0.00387236	0.0169499	0.00238214	0.0148705	0.00468705
	0.0919922	0.000400774	10.5614	0.0239426	0.0384666	0.000205826	3.0319e-05	4.90864e-06			1.39206e-07	0.000305399	2.07916e-06	0.318878			0.0282728	0.00498973	0.0178978	0.00249355	0.00508095	0.00623732
	0.0913721	0.000343983	10.5087	0.0173873	0.0387921	0.000264616	2.664e-05	3.71212e-06			1.04701e-07	0.000229695	1.55895e-06	0.317894			0.0213419	0.00442131	0.0128182	0.00192152	0.0135838	0.00761285
	0.0916556	0.000350696	10.5657	0.0206081	0.038589	0.000205643	1.76056e-05	2.7442e-06			5.88147e-08	0.00012999	8.79897e-07	0.318225			0.0245108	0.00449002	0.018308	0.00219968	0.00827896	0.00623831
	0.09192	0.000676569	10.5352	0.026916	0.0386586	0.000270648	1.2449e-05	5.2365e-06			1.82177e-07	0.000397985	2.71337e-06	0.318662			0.0274668	0.00787489	0.0153761	0.00276008	0.0100964	0.00775179
	0.091232	0.00026822	10.5191	0.0188285	0.0386441	0.00026287	0.000126946	1.77455e-05			7.23744e-08	0.000159653	1.08051e-06	0.317868			0.0197765	0.00370651	0.0138251	0.00204422	0.00971888	0.00756634
	0.0914888	0.000369332	10.5259	0.0302502	0.0381074	0.000340249	8.35923e-05	1.26369e-05			1.79804e-07	0.000394859	2.68229e-06	0.318335			0.0226467	0.00467112	0.0144773	0.00306381	-0.00430504	0.00942511
	0.0916835	0.000336483	10.5194	0.021576	0.0389071	0.000288303	4.23615e-05	7.63544e-06			1.17699e-07	0.000257708	1.75411e-06	0.318498			0.0248228	0.00435234	0.0138476	0.00228255	0.0165903	0.00818274
	0.0906834	0.000268068	10.4826	0.0163006	0.0385135	0.000232096	1.70521e-05	5.23255e-06			1.46674e-07	0.000322763	2.17923e-06	0.316727			0.0136437	0.00369744	0.010307	0.0018297	0.00630446	0.00683978
	0.0901665	0.000524378	10.5126	0.0272262	0.0383225	0.000237378	2.25305e-05	7.14039e-06			2.40438e-07	0.000535253	3.58772e-06	0.316255			0.00786591	0.00624462	0.013197	0.00278751	0.00131476	0.00695533
	0.0907782	0.000316964	10.4912	0.0197209	0.0388487	0.000219374	1.97857e-05	3.05056e-06			9.99774e-08	0.00022039	1.48803e-06	0.317005			0.0147034	0.00415391	0.011134	0.00211983	0.0150651	0.00656022
	0.0908117	0.000425787	10.4959	0.0228462	0.0389228	0.000400024	3.36717e-05	1.02537e-05			2.63785e-07	0.000580101	3.91998e-06	0.316889			0.0150775	0.00523044	0.0115834	0.00239379	0.0170004	0.0109301
	0.0904325	0.000229444	10.4751	0.0149698	0.0385262	0.000179955	1.14447e-05	3.39623e-06			7.4865e-08	0.000165621	1.11501e-06	0.316652			0.0108389	0.00335324	0.00957596	0.00172045	0.00663818	0.00566757
																	WM	SEM	WM	SEM	WM	SEM
WM ± sem	0.0911685	0.000151897	10.5146	0.00844374	0.0386467	6.23913e-05	2.44866e-05	6.33395e-06		1σ	2.30727e-08	7.12968e-05	1.08355e-06	0.844821			0.0190664	0.00276146	0.0133886	0.0012439	0.00978585	0.00356834
Neff, 95% CI	12.2653	0.000597883	13.0109	0.0298356	10.976	0.000139165	8.279	4.62752e-05		95%	3.57464e-07	0.000890161	1.50701e-05	0.844821			std	0.00598951	std	0.00266359	std	0.00594263
MSWD ± er	3.21657	0.421351	2.63055	0.408063	1.00148	0.447751	9.69512	0.524178									%/amu (individual)
																	0.00475484	0.000688662	0.00445269	0.000413688	0.00488018	0.00177952
																		0.00149369		0.00132833		0.00296358
																	Mean Fractionation: %/amu
																	Frac. (F)	0.00460417	F er	0.00023376	95% CI	0.000680939
																	Neff	23.8647	MSWD	1.98159	MSWD er	0.295755
	Silicon: O2-
	234U/238U	234U/238U_er	235U/238U	235U/238U_er	236U/238U	236U/238U_er	238U 1H/238U	238U 1H/238U_er			cov234U/238U	cov235U/238U	cov235U/234U	rho235U/234U			Δ[234U/238U]	Δ[234U/238U]_er	Δ[235U/238U]	Δ[235U/238U]_er	Δ[236U/238U]	Δ[236U/238U]_er
	0.0906342	0.000310428	10.4802	0.0136846	0.0389231	0.000194613	2.96612e-05	5.58826e-06			8.09923e-08	0.000178965	1.20749e-06	0.317159			0.0130934	0.00408996	0.010073	0.00161826	0.0170069	0.00600642
	0.0917384	0.000404704	10.4681	0.0228649	0.0385522	0.000273555	5.16609e-05	9.26474e-06			1.86072e-07	0.000403221	2.75817e-06	0.318426			0.0254359	0.00502656	0.00890658	0.00239447	0.00731573	0.00781759
	0.0906675	0.000307445	10.4654	0.017131	0.0389278	0.000198377	3.40561e-05	5.1075e-06			9.9808e-08	0.00021957	1.48391e-06	0.316985			0.0134661	0.00406213	0.00864372	0.0018981	0.017131	0.0060901
	0.0904755	0.000257879	10.4716	0.0250619	0.0388184	0.000253994	3.16987e-05	6.47142e-06			9.2558e-08	0.000204395	1.37767e-06	0.316739			0.0113203	0.00360277	0.00924289	0.00259078	0.0142731	0.00736265
	0.0905034	0.00020599	10.4494	0.0151287	0.0386805	9.19575e-05	4.43457e-05	7.39395e-06			4.24123e-08	9.3689e-05	6.31486e-07	0.316791			0.0116314	0.00315841	0.00710173	0.00173208	0.0106683	0.00398324
	0.0909904	0.000373763	10.5092	0.0191366	0.0389484	0.000229363	4.24258e-05	7.10113e-06			1.16741e-07	0.000257658	1.74237e-06	0.317692			0.0170755	0.00470944	0.0128696	0.00207022	0.0176701	0.00679329
	0.0912263	0.000416626	10.4968	0.0238181	0.038639	0.000284212	2.2794e-05	5.01787e-06			1.14866e-07	0.000252398	1.71296e-06	0.318133			0.019712	0.00514163	0.0116735	0.00248025	0.00958363	0.00807577
	0.0910932	0.000504687	10.517	0.0175597	0.0383236	0.000340789	2.56349e-05	6.29995e-06			1.69487e-07	0.000373967	2.53168e-06	0.317997			0.0182244	0.00604643	0.0136172	0.00193639	0.00134413	0.00944433
	0.092051	0.000821111	10.5621	0.0281282	0.0387263	0.000417589	3.72514e-05	1.31503e-05			4.05602e-07	0.000890294	6.07353e-06	0.319613			0.0289304	0.00943797	0.0179642	0.00287095	0.0118666	0.0113652
	0.0930099	0.000688759	10.6293	0.039226	0.0395277	0.000424276	5.10007e-05	1.72007e-05			4.53443e-07	0.000988851	6.77246e-06	0.319831			0.0396496	0.00801302	0.0244384	0.00389834	0.0328044	0.0115514
	0.0905001	0.000246678	10.4523	0.0118787	0.0384945	0.000145668	3.62406e-05	6.30763e-06			3.39157e-08	7.50086e-05	5.0481e-07	0.316499			0.0115955	0.00350378	0.00738137	0.00147826	0.00580962	0.00494801
	0.0905692	0.000306165	10.4729	0.0159617	0.0382341	0.000251326	5.5037e-05	8.81169e-06			9.51053e-08	0.000209705	1.41468e-06	0.316776			0.012367	0.00404877	0.00936528	0.00180128	-0.000994583	0.00727905
	0.0900106	0.00031912	10.4617	0.0187637	0.0384872	0.000225119	2.33983e-05	3.96276e-06			8.99868e-08	0.000199476	1.33842e-06	0.315905			0.00612318	0.004165	0.00828426	0.00203631	0.00561744	0.00667764
	0.0913392	0.000422778	10.5081	0.0152171	0.0387935	0.000225608	2.34341e-05	5.15204e-06			1.2607e-07	0.000276847	1.87946e-06	0.318132			0.0209741	0.00520512	0.0127627	0.00174209	0.0136228	0.00670085
																	WM	SEM	WM	SEM	WM	SEM
WM ± sem	0.090723	0.000168438	10.4813	0.0101488	0.0386866	9.19088e-05	3.13279e-05	3.01891e-06		1σ	2.83714e-08	0.000102999	1.37959e-06	0.807039			0.0140864	0.00287079	0.0101751	0.00135505	0.010829	0.00398288
Neff, 95% CI	9.98662	0.000499106	10.921	0.0394744	6.32703	0.000231018	10.2562	1.04934e-05		95%	2.49107e-07	0.00155823	1.59002e-05	0.807039			std	0.00844883	std	0.00455339	std	0.00807952
MSWD ± er	1.71499	0.471755	3.04071	0.448991	0.99187	0.612735	2.38089	0.464835									%/amu (individual)
																	0.0035129	0.000715929	0.00338397	0.000450653	0.00540038	0.00198625
																		0.002107		0.00227077		0.00402924
																	Mean Fractionation: %/amu
																	Frac. (F)	0.00350435	F er	0.000284205	95% CI	0.000842765
																	Neff	19.4382	MSWD	1.99898	MSWD er	0.329348
	Silicon: O3-
	234U/238U	234U/238U_er	235U/238U	235U/238U_er	236U/238U	236U/238U_er	238U 1H/238U	238U 1H/238U_er			cov234U/238U	cov235U/238U	cov235U/234U	rho235U/234U			Δ[234U/238U]	Δ[234U/238U]_er	Δ[235U/238U]	Δ[235U/238U]_er	Δ[236U/238U]	Δ[236U/238U]_er
	0.0964642	0.00518904	10.4599	0.255206	0.0384666	0.00342809	0	0			1.82958e-05	0.0367895	0.000264081	0.321884			0.078261	0.058048	0.00811833	0.0246143	0.00508063	0.0896271
	0.0903203	0.000566375	10.4551	0.0252391	0.0385558	0.000212235	0.000134872	1.67358e-05			1.64954e-07	0.000363243	2.44874e-06	0.316347			0.00958476	0.00668839	0.00764938	0.00260618	0.00741055	0.00638591
	0.0914403	0.000821868	10.5829	0.0339377	0.0389322	0.000462623	0.000105933	1.59459e-05			4.86776e-07	0.00107308	7.249e-06	0.317174			0.0221038	0.00944281	0.019965	0.00340518	0.0172452	0.0125035
	0.0910947	0.000357388	10.4724	0.0194788	0.0381683	0.000246137	0.000148773	1.85204e-05			9.52189e-08	0.000208198	1.41207e-06	0.317143			0.0182411	0.00454905	0.00931645	0.00209817	-0.00271318	0.00715459
	0.0904531	0.000228907	10.466	0.0158814	0.0385047	0.000174241	0.000134406	9.91843e-06			5.6818e-08	0.000125566	8.45413e-07	0.316511			0.011069	0.00334896	0.00870681	0.00179435	0.00607507	0.00554334
	0.0910066	0.000381945	10.4778	0.0206073	0.0385401	0.000340242	8.70246e-05	1.1867e-05			1.85528e-07	0.000406896	2.76e-06	0.31766			0.0172567	0.00479094	0.00984164	0.00219624	0.0070017	0.0094368
	0.090514	0.0006201	10.478	0.0287993	0.0382355	0.000413846	0.000104714	1.8509e-05			2.69134e-07	0.000593439	4.00441e-06	0.316859			0.0117508	0.00726079	0.00986361	0.0029297	-0.000959445	0.01126
	0.0901191	0.000300752	10.465	0.0152988	0.0385491	0.0002369	9.1938e-05	1.06758e-05			8.02984e-08	0.000178056	1.19579e-06	0.316243			0.0073364	0.00399196	0.0086056	0.00174665	0.00723507	0.00695264
	0.0904472	0.000232254	10.4714	0.0136725	0.0385524	0.000167934	0.000114469	8.94184e-06			5.52392e-08	0.000122313	8.2322e-07	0.316705			0.0110031	0.00337754	0.00922494	0.00161685	0.00732317	0.0054111
	0.0906283	0.000336598	10.4743	0.0188133	0.0384815	0.000200988	0.000143574	1.56485e-05			1.01681e-07	0.000224212	1.51385e-06	0.317053			0.0130283	0.00434082	0.00950184	0.00204107	0.00546897	0.00612929
	0.0911919	0.000247663	10.5153	0.0161187	0.0383854	0.000188785	0.000101124	1.56618e-05			7.11578e-08	0.000156739	1.0602e-06	0.31746			0.0193277	0.00352264	0.0134549	0.00181618	0.00295865	0.00585416
	0.0902498	0.000273892	10.463	0.00930093	0.0383068	0.000191471	0.000116901	1.80606e-05			6.5793e-08	0.000145675	9.79358e-07	0.316343			0.00879741	0.00374441	0.00841188	0.00129611	0.000903837	0.00590999
	0.0909054	0.00038093	10.5003	0.0193093	0.0390041	0.000284623	9.42402e-05	1.36453e-05			1.82375e-07	0.000401864	2.71796e-06	0.317483			0.0161249	0.00477973	0.0120116	0.0020847	0.0191236	0.00809746
	0.0902225	0.000576029	10.5462	0.0253162	0.0396118	0.000423237	8.66462e-05	1.39461e-05			2.62874e-07	0.000587251	3.92772e-06	0.316122			0.0084917	0.00678988	0.0164326	0.00261604	0.0350037	0.0115273
	0.0908461	0.000427708	10.491	0.0200856	0.0386449	0.000237182	0.000105256	8.29184e-06			9.18393e-08	0.000202551	1.36884e-06	0.317374			0.0154619	0.00525032	0.0111072	0.00215139	0.00973989	0.00696279
																	WM	SEM	WM	SEM	WM	SEM
WM ± sem	0.0906291	0.000126427	10.4793	0.00884176	0.0385213	7.63701e-05	0.000110013	5.91028e-06		1σ	1.59837e-08	7.81767e-05	6.67996e-07	0.59758			0.0130364	0.00258534	0.00998032	0.00126699	0.00650887	0.00374059
Neff, 95% CI	9.89355	0.000376583	8.83914	0.0296503	10.9003	0.000144567	10.4777	2.0334e-05		95%	1.41814e-07	0.000879143	6.67246e-06	0.59758			std	0.0166946	std	0.0033117	std	0.00905576
MSWD ± er	1.72747	0.474217	2.09969	0.505104	0.719811	0.449459	2.31305	0.459371									%/amu (individual)
																	0.00325106	0.000644741	0.00331918	0.000421365	0.00324596	0.00186543
																		0.00416335		0.00165154		0.00451609
																	Mean Fractionation: %/amu
																	Frac. (F)	0.00336732	F er	0.000220684	95% CI	0.000531089
																	Neff	18.206	MSWD	1.30346	MSWD er	0.340938

## Sheet: Figure 6
Energy Scans (U, Th from Uraninite)
Normalized to peak of 2E5 counts/s
	10 eV energy slit (top row)									25 eV energy slit (top row)
	O-	O-	O-	O2-	O2-	O2-	O3-	O3-	O3-	O-	O-	O-	O2-	O2-	O2-	O3-	O3-	O3-
Initial Kinetic Energy (eV)	238U	232Th	Th/U	238U	232Th	Th/U	238U	232Th	Th/U	238U	232Th	Th/U	238U	232Th	Th/U	238U	232Th	Th/U
-50	3.82651	6.99787	1.82879	7.89971	6.77214	0.857264	17.0756	19.4682	1.14012	9.01589	21.5739	2.39288	8.50831	7.89067	0.927407	27.2532	29.5684	1.08495
-49	2.29591	7.99757	3.4834	3.94985	5.92563	1.50022	13.4165	13.2738	0.989364	9.46669	15.0364	1.58835	7.00684	10.5209	1.50152	22.8732	25.0194	1.09383
-48	4.59181	10.9967	2.39485	4.55752	6.77214	1.48593	17.0756	18.5833	1.0883	16.6794	14.3826	0.862297	6.00586	17.0965	2.84664	33.0932	43.2154	1.30587
-47	7.65302	10.9967	1.43691	7.29204	9.3117	1.27697	11.587	16.8135	1.45107	9.91748	17.6514	1.77983	6.7566	13.1511	1.94641	22.8732	34.1174	1.49159
-46	3.06121	3.99878	1.30627	3.94985	10.1582	2.57179	17.0756	14.1587	0.829177	9.91748	20.9201	2.10942	7.50733	9.20578	1.22624	30.6599	42.0782	1.37242
-45	7.65302	7.99757	1.04502	5.16519	5.92563	1.14722	14.6362	25.6627	1.75337	13.9746	13.7288	0.982411	7.75757	17.0965	2.20385	34.0665	32.9802	0.968112
-44	6.88772	13.9957	2.03198	5.16519	11.0047	2.13055	18.9051	24.7778	1.31064	11.2699	13.0751	1.16018	9.75953	9.20578	0.943261	31.6332	44.3527	1.40209
-43	7.65302	13.9957	1.82878	4.86136	12.6978	2.61199	18.2952	23.8928	1.30596	9.91748	16.3439	1.64799	9.75953	14.4662	1.48226	36.9865	40.9409	1.10691
-42	6.88772	10.9967	1.59657	4.86136	11.0047	2.26371	20.1248	25.6627	1.27518	11.7207	18.3051	1.56178	8.00782	19.7267	2.46343	37.4732	44.3527	1.18358
-41	12.2448	19.9939	1.63285	6.38053	2.53955	0.398016	15.246	22.123	1.45107	12.1715	16.9976	1.39651	9.75953	14.4662	1.48226	34.5532	31.8429	0.921562
-40	11.4795	9.99696	0.870853	5.46903	10.1582	1.8574	25.6134	16.8135	0.656434	14.4254	22.2277	1.54087	13.0127	7.89067	0.606382	33.5799	32.9802	0.982141
-39	6.12242	12.9961	2.12271	5.77286	8.46518	1.46638	23.174	23.8928	1.03102	13.9746	21.5739	1.54379	10.26	28.9325	2.81993	34.5532	38.6664	1.11904
-38	6.12242	8.99727	1.46956	6.9882	13.5443	1.93817	20.7346	22.123	1.06696	10.8191	20.9201	1.93363	10.7605	13.1511	1.22216	37.4732	34.1174	0.910448
-37	6.88772	11.9963	1.74169	5.46903	8.46518	1.54784	23.174	28.3175	1.22195	18.0318	22.8814	1.26895	14.7644	24.9871	1.69239	45.2598	37.5292	0.829195
-36	6.12242	11.9963	1.9594	4.55752	16.0838	3.52907	21.9543	31.8571	1.45106	15.327	19.6126	1.27961	13.7634	7.89067	0.573308	38.4465	56.8624	1.479
-35	9.94893	9.99696	1.00483	7.89971	10.1582	1.2859	21.3444	27.4325	1.28523	14.4254	25.4964	1.76747	11.5112	15.7813	1.37095	52.5598	48.9017	0.930401
-34	5.35712	12.9961	2.42595	5.46903	6.77214	1.23827	24.3937	26.5476	1.0883	15.327	26.8039	1.7488	13.263	22.3569	1.68566	47.6931	42.0782	0.88227
-33	6.88772	9.99696	1.45142	6.0767	6.77214	1.11444	24.3937	33.627	1.37851	16.6794	22.2277	1.33264	11.0107	19.7267	1.79159	49.6398	60.2741	1.21423
-32	7.65302	15.9951	2.09004	6.9882	10.1582	1.45362	29.2724	35.3968	1.20922	14.8762	29.4189	1.97758	13.263	30.2476	2.2806	46.7198	51.1762	1.09539
-31	6.88772	6.99787	1.01599	5.46903	8.46518	1.54784	23.7838	27.4325	1.15341	21.1874	26.8039	1.26509	13.0127	30.2476	2.32447	49.1531	56.8624	1.15684
-30	15.3061	7.99757	0.522509	5.46903	11.0047	2.01218	26.2232	35.3968	1.34983	21.6381	40.5328	1.87321	20.7703	21.0418	1.01307	61.3198	65.9604	1.07568
-29	6.12242	13.9957	2.28598	8.20354	11.0047	1.34146	25.6134	30.9722	1.20922	22.5397	34.649	1.53724	13.7634	32.8778	2.38878	56.4531	62.5487	1.10798
-28	12.2448	15.9951	1.30628	6.9882	16.0838	2.30157	32.3216	32.742	1.01301	25.6953	43.1478	1.67921	17.7674	23.672	1.33233	70.0798	75.0584	1.07104
-27	12.2448	19.9939	1.63285	8.20354	16.0838	1.96059	29.2724	32.742	1.11853	27.9493	37.264	1.33327	20.2698	23.672	1.16785	72.0264	89.8426	1.24736
-26	7.65302	20.9936	2.74318	9.72272	11.0047	1.13185	32.9314	46.0159	1.39733	35.6128	45.1091	1.26665	66.5652	47.344	0.711243	180.553	144.431	0.799937
-25	12.2448	13.9957	1.14299	10.6342	14.3908	1.35326	35.9807	44.246	1.22971	192.49	200.703	1.04267	490.992	301.161	0.613373	731.471	573.177	0.783595
-24	10.7142	11.9963	1.11966	9.72272	9.3117	0.957726	41.4692	47.7857	1.15232	1007.56	1119.25	1.11085	2385.39	1829.36	0.766902	2928.5	2379.19	0.812426
-23	9.18363	18.9942	2.06827	10.9381	15.2373	1.39305	36.5905	45.1309	1.2334	4269.13	4448.56	1.04203	8399.82	6716.75	0.79963	9024.08	7234.66	0.801706
-22	14.5407	19.9939	1.37503	10.9381	19.4699	1.78001	42.0791	51.3254	1.21974	11786.2	11299.5	0.958706	20327.7	16710.1	0.822036	22229.7	17288.6	0.777725
-21	9.18363	16.9948	1.85055	15.7994	20.3164	1.2859	40.2496	49.5555	1.2312	26024.7	24305.9	0.933955	39491.7	32545.6	0.824112	41704.6	33469.1	0.802528
-20	20.6632	20.9936	1.01599	10.9381	16.9304	1.54784	42.0791	52.2103	1.24077	40481.2	37967.6	0.937907	56141.5	47138.4	0.839636	59216.9	48439.8	0.818006
-19	13.0101	23.9927	1.84416	15.7994	14.3908	0.910845	46.9578	53.9802	1.14955	55010.7	51746	0.940653	73213	61968.7	0.846417	76453.3	63980.9	0.836863
-18	14.5407	11.9963	0.825015	16.1033	21.1629	1.3142	52.4464	61.9445	1.1811	70955.5	67510.8	0.951453	90758.7	78213.1	0.86177	94458.9	79038	0.836745
-17	13.0101	20.9936	1.61364	14.2803	26.2421	1.83764	51.2267	72.5635	1.41652	84237.7	81168.5	0.963565	103413	91695.9	0.886696	107106	92233.4	0.861141
-16	18.3673	25.9921	1.41513	16.1033	24.549	1.52447	47.5677	57.5198	1.20922	97127	93258.8	0.960174	116034	103477	0.891782	119469	104420	0.874034
-15	22.1938	26.9918	1.21619	16.4071	25.3955	1.54784	71.3515	68.1389	0.954975	107646	104112	0.96717	126062	113724	0.902128	130164	115273	0.885598
-14	22.1938	39.9879	1.80176	17.9263	29.6281	1.65277	84.7681	82.2977	0.970857	118133	114321	0.967731	135700	123649	0.911194	139896	124698	0.891362
-13	52.0406	57.9824	1.11418	89.024	96.5032	1.08401	196.37	212.381	1.08153	129059	126128	0.977289	146030	135552	0.928248	149209	134581	0.901963
-12	344.388	327.902	0.95213	890.88	681.454	0.764922	881.238	974.312	1.10562	136970	134841	0.984456	153216	142507	0.930105	156410	141620	0.905441
-11	1921.74	1802.5	0.937952	4212.26	3293.98	0.781998	3764.87	3671.74	0.975263	144900	142411	0.982823	160107	149944	0.936524	163253	148137	0.907408
-10	9143.03	8959.38	0.979914	14898.9	11791.7	0.791448	14121.1	13530.6	0.958183	152432	150756	0.989005	167144	157694	0.943462	169550	157285	0.927661
-9	23042.8	21363.8	0.927136	32059.4	26692.1	0.832583	31509.1	31239.5	0.991444	158752	156812	0.98778	171768	162774	0.947639	174919	162496	0.928979
-8	42745.1	40307.1	0.942964	53952.7	47521.2	0.880794	56155.1	53241.8	0.94812	164506	163218	0.99217	176664	167788	0.949758	177793	167660	0.943007
-7	69406	64918.2	0.93534	80473.4	73250.7	0.910247	84264.2	79836.4	0.947453	170903	169349	0.990907	181146	173700	0.958895	182679	173047	0.947274
-6	91552.7	87393.4	0.954569	102308	95872.4	0.937096	107457	102585	0.954661	175296	173952	0.992333	184609	178980	0.969509	186732	177680	0.951524
-5	114114	108373	0.949691	124382	117557	0.945129	128286	124364	0.969428	180012	179252	0.995778	187666	181665	0.968023	189261	181615	0.959601
-4	135134	129507	0.95836	145758	139490	0.956997	148791	144246	0.969454	184158	183585	0.996889	191349	186285	0.973535	191684	186269	0.97175
-3	153052	149276	0.975329	162174	157254	0.969662	165345	161104	0.974351	188167	187214	0.994935	193143	189547	0.981382	194626	188100	0.966469
-2	169827	165395	0.973903	178428	172722	0.968021	180018	176977	0.983107	190982	190976	0.999969	195983	193677	0.988234	196452	191658	0.975597
-1	186146	183575	0.986188	192871	189120	0.980552	193840	192153	0.991297	194706	194316	0.997997	197869	195934	0.990221	198244	195301	0.985155
0	196496	194929	0.992025	200000	198575	0.992875	200000	200000	1	197625	196894	0.996301	199835	198131	0.991473	199927	197972	0.990221
1	200000	200000	1	199366	200000	1.00318	197037	198380	1.00682	200000	199499	0.997495	200000	200000	1	200000	200000	1
2	193769	196632	1.01478	190570	192460	1.00992	184554	188265	1.02011	199416	200000	1.00293	196541	198512	1.01003	195852	197581	1.00883
3	182846	187427	1.02505	177371	181421	1.02283	168339	173504	1.03068	194620	196535	1.00984	186213	189566	1.01801	184760	189864	1.02763
4	166710	173296	1.03951	161264	166425	1.032	150062	157124	1.04706	185285	187463	1.01175	170001	176500	1.03823	166981	175724	1.05236
5	153876	161109	1.04701	147276	153201	1.04023	135634	142994	1.05426	173575	176262	1.01548	154551	163611	1.05862	149410	162549	1.08794
6	140727	148760	1.05708	133732	140698	1.05209	121285	130030	1.0721	160582	165703	1.03189	139760	149702	1.07114	133730	147058	1.09966
7	127636	135511	1.0617	120187	127000	1.05669	107603	116790	1.08538	147821	151768	1.0267	124499	136382	1.09545	117210	133013	1.13483
8	116692	124875	1.07012	110118	117373	1.06588	97111.7	105718	1.08862	136041	140644	1.03384	113386	125074	1.10308	104606	120604	1.15294
9	107798	115410	1.07061	100685	108441	1.07703	87725.6	96784.8	1.10327	126087	131088	1.03966	102902	115266	1.12015	94418.7	110643	1.17183
10	98726.6	105600	1.06962	90798.9	98122.8	1.08066	77643.4	87237.6	1.12357	115643	120627	1.0431	92130.7	104763	1.13711	83069.5	99041.9	1.19228
11	91228.7	97133.1	1.06472	83286.4	89902.6	1.07944	70050.1	79573.8	1.13596	107355	112158	1.04474	84222.5	96265.6	1.14299	74450.9	90671.9	1.21788
12	84458.9	90651.4	1.07332	76245.5	82861.9	1.08678	64184.6	72948.7	1.13655	100380	104501	1.04105	76702.4	87959.2	1.14676	67099.7	82882.5	1.23521
13	77489.7	83045.5	1.0717	69059.6	76246.2	1.10406	56947.4	65314.9	1.14693	92500	96287.9	1.04095	69160.6	80929.4	1.17017	59080.2	75676.8	1.28092
14	71973.2	77260.5	1.07346	64107.7	70012.1	1.0921	52130.1	60374.5	1.15815	86188.9	90190.1	1.04642	63485.9	75320.5	1.18641	53421.8	68908.6	1.2899
15	67171.9	72068.5	1.0729	58725	64476.4	1.09794	47490.3	54927.8	1.15661	80605.5	84241.4	1.04511	58355.5	70040.2	1.20023	48293.2	63313.5	1.31102
16	62160.6	66417.4	1.06848	53933.8	59382.9	1.10103	43215.8	50384.3	1.16588	75142.1	78462.1	1.04418	53082.5	64286.4	1.21107	43222.7	57753.3	1.33618
17	57986.8	62122.2	1.07132	49719.3	55067.8	1.10757	39646.4	45789.1	1.15494	70746.3	73665.2	1.04126	48953	59090.3	1.20708	39330.6	53616.1	1.36322
18	54140.3	57677.2	1.06533	45646.5	50448.1	1.10519	35596.9	42329.7	1.18914	65933.5	68574.9	1.04006	44472.7	55009.9	1.23694	35349.6	48724.5	1.37836
19	51049.6	54068.8	1.05914	42622.6	47060	1.10411	33388.3	39018.5	1.16863	62287.6	64747.6	1.03949	41620.2	51045.7	1.22646	32344	45188.2	1.39711
20	48606.2	50877.1	1.04672	39809.5	44271.7	1.11209	30654.1	36855.9	1.20232	59395.9	61175.2	1.02996	38677.9	47599.2	1.23066	30030.7	41582.7	1.38467
21	45034.6	47841.9	1.06234	36545.4	41181	1.12684	28117.5	33643.7	1.19654	55909	57682	1.03171	35593.4	44266.1	1.24366	27089.9	39012.3	1.4401
22	43272.4	45110.3	1.04247	34491	38298.3	1.11039	26409.6	31330.8	1.18634	53221.9	55083.7	1.03498	33728	41862.5	1.24118	25296.8	36377.2	1.43802
23	40546.9	42758.1	1.05453	32565.5	36824.4	1.13078	24206.8	29737.3	1.22847	50565.5	52170.5	1.03174	31580	39602.6	1.25404	23234.5	34297.7	1.47615
24	38510.6	40341.1	1.04753	30174.9	33989.5	1.12642	22414.5	27311.4	1.21847	47806.5	49325.9	1.03178	29301.1	36789.9	1.25558	21107	31525.1	1.49359
25	36625.4	37978.3	1.03694	28251.4	32146.4	1.13787	20854.2	25522.4	1.22385	45559.7	46849.7	1.02831	27812.3	35025	1.25933	19595.7	29885.2	1.52509
26	35121.2	35881.8	1.02166	26575.5	30247.4	1.13817	19582.7	24202.8	1.23593	43500.3	44670.4	1.0269	26047.4	33007.5	1.26721	18084.9	27612.5	1.52683
27	32873.1	33973.5	1.03347	25048.2	28310.4	1.13024	18340.6	22346.7	1.21843	41419.9	42199.3	1.01882	24568.3	31046.7	1.26369	16751.1	25874.8	1.54466
28	31782.8	32263.5	1.01512	23569.3	26808.2	1.13742	17080.3	21108.7	1.23585	39855.8	40387.9	1.01335	23267.1	29145.2	1.25264	15604.5	24310.1	1.55789
29	30390.7	30752.7	1.01191	22379.4	25554.3	1.14187	16089.2	19813.3	1.23147	38276.5	38573.3	1.00775	22028.6	27805.6	1.26225	14628.4	22837.7	1.56119
30	29035.4	29360.9	1.01121	21072.8	23789.6	1.12892	15020	18606.4	1.23877	36594.8	36891.8	1.00812	20736.6	26043.7	1.25593	13393.7	21574.7	1.61081
31	28046.4	27937.2	0.996106	20043.6	22784.8	1.13676	14166.3	17575.8	1.24068	35258.9	35409.5	1.00427	19657.9	24892.3	1.26627	12531.6	20105.7	1.6044
32	26687.4	26376.5	0.98835	18863.9	21365	1.13259	13254.6	16432.7	1.23977	33921.3	33823.1	0.997105	18554.7	23530.5	1.26817	11757.3	19117	1.62597
33	25525.3	25201.1	0.987299	18029.1	20417.2	1.13246	12482.1	15725.3	1.25983	32368.8	32833.9	1.01437	17970	22275.3	1.23958	10909	18161.3	1.6648
34	24824.5	24274.7	0.977853	17114.3	19408.3	1.13404	11859.1	14759.4	1.24456	31407.2	31524.6	1.00374	17039.3	21458.2	1.25934	10261.4	17091.8	1.66564
35	23958.1	23384.4	0.976054	16284.2	18801.8	1.1546	11132.4	13929.9	1.25129	30274	30210.8	0.997912	16302	20489.9	1.25689	9776.86	16384.2	1.67581
36	23230.5	22199	0.955597	15542.7	17790.5	1.14462	10495.4	13391.6	1.27595	29290.4	29164.8	0.995712	15670.8	19418.9	1.23918	9144.34	15613.9	1.70749
37	22393.3	21539.8	0.961886	14917.1	17040.9	1.14237	10019.5	12817.1	1.27922	28518.2	28344	0.993892	14970.6	18907.2	1.26296	8532.79	14879	1.74374
38	21479.6	20549.6	0.956703	14162.3	16175.3	1.14214	9476.52	11895.5	1.25526	27364.9	27112.9	0.990791	14374.6	17866.5	1.24292	8012.3	14146.4	1.76559
39	20984.8	19962.4	0.951279	13533.5	15562.9	1.14995	9034.81	11482.1	1.27087	26696.1	25957.1	0.972318	13852	17149.5	1.23805	7604.3	13300	1.74901
40	20432.7	19438.3	0.951333	12964.3	14814.2	1.14269	8499.77	10881.9	1.28026	25993.1	25191.4	0.969157	13258.1	16472	1.24241	7141.77	12695.9	1.7777
41	19568	18358	0.938164	12293	14115.5	1.14826	8133.72	10217.1	1.25614	25129.4	24384.5	0.970357	12683.7	15760.3	1.24256	6741.09	11970.1	1.77569
42	19034.2	17745.9	0.932317	11959.6	13696.3	1.14521	7731.69	9825.88	1.27086	24452.6	24010.1	0.981904	12241.4	15266.9	1.24715	6419.77	11616.3	1.80946
43	18560.2	17263.8	0.930152	11451.7	13139.1	1.14735	7362.61	9401.88	1.27698	23944.3	22929.7	0.957627	11871.6	14726.3	1.24046	6128.65	11000.9	1.795
44	17982	16442.7	0.914398	11041.7	12536.9	1.13541	7106.4	9104.46	1.28116	23156.5	22364.3	0.965789	11348.9	13764.6	1.21286	5658.37	10506.1	1.85674
45	17615.9	15849.6	0.899733	10629.9	12232.1	1.15073	6750.14	8666.3	1.28387	22460.9	21806.8	0.970878	10992.4	13651.5	1.2419	5487.5	10246.7	1.86728
46	17164.1	15560.6	0.906578	10238.2	11627.4	1.13569	6475.63	8388.36	1.29537	21826.7	21127.6	0.96797	10618.5	13088.5	1.23261	5371.15	9842.91	1.83255
47	16532.4	15030.5	0.909154	9875.09	11333.6	1.1477	6288.35	8118.39	1.29102	21173.5	20271.7	0.957409	10318.4	12458.4	1.2074	4958.83	9260.5	1.86748
48	16209.2	14672.5	0.905196	9513.52	10864.4	1.142	5834.51	7569.61	1.29739	20666.6	20025.1	0.96896	9970.93	12324.2	1.23601	4715.92	8856.69	1.87804
49	15899.9	14188.5	0.892364	9048.87	10463	1.15628	5638.09	7281.94	1.29156	20181.4	19277.2	0.955196	9538.3	11766.4	1.2336	4514.38	8393.74	1.85933
50	15633.4	13777.4	0.88128	8828.1	10188.7	1.15412	5420.32	7079.25	1.30606	19783.3	18753.8	0.947961	9341.4	11404.7	1.22088	4358.61	8142.35	1.86811
51	14910.5	13376.4	0.897113	8553.83	10072.7	1.17757	5218.41	6766.81	1.29672	19194.3	18140.8	0.945114	9134.49	11142.9	1.21987	4081.15	7696.47	1.88586
52	14569	12986.4	0.891372	8249.16	9517.18	1.15372	4879.88	6432.24	1.31811	18918.6	17591.2	0.929836	8763.01	10487.9	1.19684	3898.61	7606.61	1.95111
53	14536.1	12757.4	0.877636	7966.99	9099.72	1.14218	4792.65	6333.99	1.3216	18340.5	17435.5	0.950656	8474.71	10294.5	1.21473	3697.57	7380.26	1.99598
54	14100.4	12395.3	0.879074	7752.33	8948.15	1.15425	4668.22	6092.36	1.30507	17946.5	17105.7	0.95315	8272.83	9949.85	1.20271	3525.74	7032.2	1.99453
55	13665.5	12175.3	0.890952	7411.19	8536.62	1.15186	4394.95	5768.42	1.31251	17565.6	16490.1	0.938772	7986.29	9727.56	1.21803	3380.2	6747.84	1.99628
56	13497.1	11629.3	0.861615	7315.42	8354.57	1.14205	4258.93	5532.11	1.29894	17157.2	16078.6	0.937134	7782.92	9176.41	1.17904	3206.92	6548.79	2.04208
57	13125	11473.3	0.874156	6952.41	8072.6	1.16112	4130.23	5439.18	1.31692	16829.6	15835.9	0.940955	7614.61	9105.39	1.19578	3065.28	6205.29	2.02438
58	13065.2	10970.3	0.839658	6793.1	7823.66	1.15171	4002.75	5297.57	1.32348	16366.6	15277.9	0.93348	7397.72	9018.57	1.2191	2958.68	5996	2.02658
59	12764.3	10672.3	0.836105	6610.08	7661.09	1.159	3775.24	5019.66	1.32963	15947.4	15018.9	0.941777	7207.63	8602.92	1.19359	2782.48	5881.12	2.11363
60	12367	10555.3	0.853505	6431.02	7421.47	1.15401	3685.58	4923.19	1.3358	15741.6	14760.5	0.937675	6995.76	8395.09	1.20003	2767.39	5719.61	2.06679
61	12240.6	10311.3	0.842385	6224.59	7054.84	1.13338	3519.67	4685.99	1.33137	15202.9	14508.6	0.954331	6764.86	8229.36	1.21649	2640.35	5616.11	2.12703
62	11908.4	10223.3	0.858495	6062.86	7071.77	1.16641	3494.05	4544.38	1.30061	15050.8	14097.1	0.936635	6627.13	8120.19	1.2253	2552.25	5296.5	2.07523
63	11722.3	9934.34	0.847474	5868.91	6818.61	1.16182	3168.35	4456.77	1.40665	14686.2	13857.1	0.943546	6514.44	7694.02	1.18107	2428.13	5139.54	2.11667
64	11439	9556.35	0.835418	5690.47	6578.99	1.15614	3180.55	4402.78	1.38428	14323	13597.4	0.94934	6291.06	7466.47	1.18684	2296.72	4898.41	2.13279
65	11191.7	9512.35	0.849947	5536.65	6504.48	1.1748	3109.8	3900.96	1.25441	14062.2	13123.2	0.933225	6158.34	7287.59	1.18337	2257.29	4753.97	2.10605
66	11017.2	9084.37	0.824563	5392.26	6329.22	1.17376	2997.57	3956.72	1.31998	13789.3	12883.1	0.934282	6015.61	6989.01	1.16181	2179.9	4757.38	2.18238
67	10684.9	9029.38	0.84506	5272.18	6104.85	1.15794	2853.63	3870.87	1.35647	13668.4	12747.7	0.93264	5827.3	7003.48	1.20184	2081.1	4612.93	2.21658
68	10446	8782.39	0.840742	5135.39	6043.04	1.17674	2786.54	3765.55	1.35134	13138.3	12492.6	0.950854	5720.38	6773.31	1.18407	2011.98	4393.42	2.18363
69	10222.5	8496.41	0.831148	4987.36	5834.75	1.16991	2687.12	3670.86	1.36609	12858.1	12073.3	0.938965	5616.21	6558.91	1.16785	1932.16	4343.38	2.24794
70	10245.5	8439.41	0.823719	4835.37	5746.7	1.18847	2532.82	3560.23	1.40564	12753.9	11869.9	0.930688	5409.38	6343.2	1.17263	1870.35	4204.62	2.24804
71	9800.65	8431.41	0.860291	4766.07	5551.12	1.16472	2516.96	3418.63	1.35824	12457.9	11550.1	0.927131	5307.98	6149.86	1.15861	1751.1	4005.58	2.28747
72	9678.16	8188.43	0.846073	4593.72	5473.22	1.19146	2383.39	3229.23	1.35489	12141.2	11544.2	0.950829	5148.23	6166.96	1.19788	1719.95	3915.73	2.27665
73	9542.66	7940.45	0.8321	4494.33	5229.38	1.16355	2360.21	3215.07	1.3622	12080.8	11201.4	0.927207	5108.92	5989.39	1.17234	1650.35	3808.82	2.30789
74	9298.44	7719.47	0.83019	4375.18	5162.5	1.17995	2338.25	3128.34	1.3379	11796.6	10950.3	0.928259	4923.64	5947.31	1.20791	1614.83	3683.71	2.28118
75	9082.56	7546.49	0.830877	4292.81	5176.04	1.20575	2217.49	2977.01	1.34251	11414	10654	0.933415	4911.87	5713.19	1.16314	1576.38	3706.45	2.35124
76	8826.1	7619.48	0.86329	4211.65	4830.61	1.14696	2167.48	2967.27	1.369	11219.2	10529.7	0.938543	4818.48	5598.76	1.16193	1523.81	3626.84	2.38011
77	8762.56	7351.51	0.838968	4120.16	4794.2	1.1636	2160.16	2879.66	1.33308	11131.2	10276	0.923171	4667.75	5461.97	1.17015	1450.81	3451.69	2.37915
78	8534.43	7255.52	0.850147	3938.7	4587.62	1.16475	2032.08	2730.09	1.3435	10893	10090.2	0.926301	4509.02	5362.01	1.18917	1433.28	3383.45	2.36063
79	8555.1	7134.53	0.833951	3883.69	4644.35	1.19586	1970.48	2670.8	1.35541	10597.1	9709.58	0.916249	4507.01	5150.25	1.14272	1322.32	3320.9	2.51142
80	8271.85	6968.55	0.842442	3779.74	4425.91	1.17096	1913.76	2672.57	1.3965	10402.2	9560.46	0.919081	4339.02	5017.41	1.15635	1330.1	3135.51	2.35735
81	8228.21	6697.58	0.813978	3710.45	4259.12	1.14787	1889.98	2540.7	1.3443	10215.5	9499.64	0.929924	4301.96	4814.87	1.11923	1255.15	2995.62	2.38666
82	8042.96	6683.58	0.830985	3585.83	4309.08	1.2017	1800.32	2464.6	1.36898	10030.1	9263.54	0.923574	4223.1	4759.63	1.12705	1212.32	3047.93	2.51413
83	7751.29	6556.6	0.845872	3546.62	4033.92	1.1374	1723.48	2393.8	1.38893	9790.12	8978.39	0.917087	4139.23	4779.35	1.15465	1173.87	2934.2	2.4996
84	7746.7	6462.61	0.83424	3472.16	4048.31	1.16593	1717.99	2354.86	1.37071	9603.83	8980.35	0.93508	4029.32	4750.42	1.17896	1132.99	2805.68	2.47635
85	7637.23	6267.63	0.820668	3371.87	3957.72	1.17375	1613.09	2288.48	1.41869	9447.32	8760.61	0.927312	3902.64	4592.59	1.17679	1155.87	2803.41	2.42537
86	7467.29	6191.64	0.829168	3260.63	3980.58	1.2208	1619.8	2292.91	1.41555	9306.14	8466.97	0.909826	3827.54	4574.18	1.19507	1096.49	2737.45	2.49656
87	7458.87	6140.65	0.823268	3241.48	3831.58	1.18205	1563.69	2212.38	1.41485	9074.75	8494.43	0.936051	3801.25	4347.96	1.14382	1062.91	2711.29	2.55082
88	7159.56	5984.67	0.835899	3166.11	3738.45	1.18077	1556.37	2130.07	1.36861	8958.38	8124.28	0.906892	3783.73	4305.87	1.138	1026.4	2640.77	2.57285
89	7175.63	5871.69	0.818282	3072.2	3615.69	1.17691	1466.72	2154.85	1.46916	8868.17	7997.41	0.901811	3662.06	4271.67	1.16647	1005.48	2537.28	2.52345
90	6980.43	5631.72	0.806787	3025.7	3584.36	1.18464	1438.05	2045.12	1.42215	8648.97	7803.83	0.902284	3594.22	4108.59	1.14311	1001.1	2514.53	2.51177
91	6845.7	5664.72	0.827486	2933	3435.36	1.17128	1452.08	1946.88	1.34075	8479.83	7710.97	0.909331	3541.64	3975.75	1.12257	920.306	2449.7	2.66183
92	6714.81	5650.72	0.841531	2860.06	3374.41	1.17984	1387.43	2015.03	1.45235	8434.28	7569.06	0.897416	3473.05	3956.02	1.13906	925.172	2453.11	2.65152
93	6655.86	5313.77	0.79836	2868.27	3293.98	1.14842	1306.93	1834.49	1.40366	8280.93	7312.71	0.883078	3358.65	3987.59	1.18726	907.165	2272.28	2.50481
94	6536.45	5326.77	0.814933	2755.52	3296.52	1.19633	1282.53	1837.15	1.43244	7990.03	7248.62	0.907208	3380.68	3877.11	1.14684	894.998	2345.07	2.6202
95	6482.1	5114.8	0.789065	2670.12	3256.73	1.21969	1302.05	1776.08	1.36406	7979.65	7006.66	0.878066	3323.1	3771.89	1.13505	842.922	2274.56	2.69842
96	6428.52	5062.81	0.787555	2654.01	3117.04	1.17446	1231.91	1770.77	1.43742	7675.67	6984.43	0.909944	3242.74	3712.7	1.14493	800.58	2182.43	2.72606
97	6356.56	4962.83	0.780741	2610.55	3137.36	1.2018	1211.18	1738.03	1.43499	7718.07	6845.79	0.886982	3201.19	3500.95	1.09364	799.607	2036.86	2.54733
98	6323.64	4921.84	0.778324	2560.11	2999.36	1.17157	1191.66	1789.36	1.50157	7556.61	6784.97	0.897885	3129.59	3543.04	1.13211	772.353	2122.16	2.74766
99	6388.71	4881.84	0.764135	2479.27	2923.16	1.17904	1126.4	1645.11	1.4605	7371.7	6611.03	0.896812	3146.36	3515.42	1.1173	728.551	1964.07	2.69586
100	6433.11	4964.83	0.771762	2433.99	2902.85	1.19263	1183.73	1624.75	1.37257	7311.26	6570.48	0.89868	3167.89	3466.76	1.09434	785.98	2086.9	2.65516

## Sheet: Figure 7
Depth profiles of U, UO, UO2 in U900
Graphite																		Silicon
O						O2						O3						O						O2						O3
Time	U	UO	UO2	U/UO	U/UO2	Time	U	UO	UO2	U/UO	U/UO2	Time	U	UO	UO2	U/UO	U/UO2	Time	U	UO	UO2	U/UO	U/UO2	Time	U	UO	UO2	U/UO	U/UO2	Time	U	UO	UO2	U/UO	U/UO2
2.552	130355	195462	144803	0.666905	0.900222	1.888	160520	211466	126666	0.759081	1.26727	1.5967	276999	276823	148393	1.00063	1.86666	2.464	65575.4	119471	82710.2	0.548881	0.792833	1.792	53933	98484.4	77053.5	0.54763	0.699942	1.2	62233.2	171943	159827	0.361941	0.389379
4.928	132049	197843	145965	0.667445	0.90466	3.584	164989	216706	128284	0.761347	1.28612	3.1087	289231	284879	148624	1.01528	1.94606	4.8521	57276	105300	76353.7	0.543932	0.75014	3.5216	56921.5	91149.4	67120.1	0.624486	0.848054	2.24	66919.4	145110	124173	0.461163	0.53892
7.3095	133374	200099	147503	0.666538	0.904211	5.3128	168594	221405	128820	0.761472	1.30875	4.6207	299830	291850	147431	1.02734	2.03369	7.2336	54804.4	95425.5	70020.7	0.574316	0.782688	5.284	61102.1	89171.2	62230.1	0.685222	0.981874	3.32	74631.4	134459	105687	0.555049	0.706152
9.6943	133819	202286	148596	0.661533	0.900554	7.0488	172275	225621	129766	0.763558	1.32758	6.1096	310523	296969	146546	1.04564	2.11895	9.6096	54682	88779.6	64559.7	0.61593	0.846999	6.98	66241	89793.1	58691.6	0.737707	1.12863	4.4025	84955.8	130672	94415.4	0.650145	0.899809
12.0791	135045	204075	149117	0.661743	0.905633	8.8128	175335	229031	130354	0.765551	1.34507	7.6216	320424	302389	146071	1.05964	2.19361	11.9856	55734.1	84305.5	60542.7	0.661096	0.920575	8.6528	71360.9	92020.1	57131.5	0.775492	1.24906	5.4835	94265	128934	87474.6	0.731109	1.07763
14.4551	136360	205721	149789	0.66284	0.910347	10.5432	179079	233039	131224	0.768451	1.36468	9.1371	331550	309841	146093	1.07006	2.26945	14.3649	57207.7	81589.2	57436.7	0.701168	0.996013	10.3808	76722.6	95641.4	56447.1	0.802191	1.35919	6.5465	106515	131296	83218	0.811254	1.27995
16.8311	136965	207350	151347	0.660552	0.904975	12.2808	182312	236175	131962	0.771938	1.38155	10.6547	341894	317066	146359	1.07831	2.336	16.742	58825.7	79978.3	55059.5	0.735521	1.0684	12.1088	82364.4	100856	56627.5	0.81665	1.45449	7.6275	117651	135478	81180.6	0.868416	1.44926
19.2951	137680	208659	152109	0.659832	0.90514	14.0144	186058	239114	132344	0.778113	1.40587	12.1681	350279	322019	146021	1.08776	2.39882	19.0399	60744.2	78816	53437.6	0.770709	1.13673	13.84	87383.6	106881	57127.5	0.817581	1.52962	8.71	130416	141563	79249.6	0.921254	1.64563
21.6755	138755	210930	152791	0.657823	0.908134	15.7424	188505	242685	132212	0.776748	1.42577	13.6815	360710	326980	145341	1.10316	2.48181	21.3741	62667.7	78453.7	52498.5	0.798786	1.19371	15.5368	93648.6	113481	58312.4	0.825233	1.60598	9.79	144098	150587	78708.2	0.956909	1.83079
24.0515	139650	211616	153447	0.659921	0.910085	17.4544	191675	245800	133291	0.779801	1.43802	15.1935	370864	332897	145999	1.11405	2.54019	23.7523	64415.6	78327.4	51260.8	0.82239	1.25663	17.2688	98815	121304	59200.2	0.814603	1.66917	10.87	158486	159553	78575.6	0.993313	2.01699
26.4341	141026	213565	154985	0.660343	0.909933	19.1896	194388	248644	133636	0.781791	1.4546	16.7069	380056	339339	145814	1.11999	2.60644	26.1316	66440	78458.3	50762.8	0.84682	1.30883	18.9368	103570	128609	60131.1	0.805314	1.72241	11.9535	174028	172124	78267	1.01106	2.22351
28.7727	141529	215674	155606	0.656219	0.909533	20.9208	197175	252149	134051	0.781979	1.47089	18.2224	387613	345131	146390	1.12309	2.64781	28.4218	68187.1	79034.3	50574.8	0.862753	1.34824	20.6072	108315	135946	61226.6	0.796752	1.76909	13.0345	188806	185786	79755	1.01626	2.36733
31.1531	142662	216818	156277	0.657979	0.912876	22.6544	199595	255565	134892	0.780995	1.47966	19.7365	396583	350460	146147	1.13161	2.71359	30.8121	70404.6	79746.1	49973	0.88286	1.40885	22.336	112547	144134	62556.9	0.780849	1.79911	14.1165	206326	199041	80714.6	1.0366	2.55624
33.5324	143185	218057	157044	0.656637	0.91175	24.384	202102	258549	134511	0.78168	1.5025	21.2485	404176	356286	146233	1.13441	2.76392	33.1914	71733.1	80997.9	49281.3	0.885617	1.45559	24.0976	116698	152064	64058.9	0.767426	1.82172	15.198	222152	214640	81900.6	1.035	2.71246
35.959	143952	219998	158137	0.654332	0.910297	26.112	204798	260680	135024	0.785628	1.51675	22.7605	412744	361594	146587	1.14146	2.81569	35.5751	73724.4	81823.8	49345.7	0.901013	1.49404	25.796	120372	158849	65715.6	0.757775	1.8317	16.279	239118	232914	84117.4	1.02664	2.84267
38.291	144913	221598	158451	0.653944	0.914559	27.84	207181	263210	135608	0.787133	1.5278	24.276	419419	367566	146721	1.14107	2.8586	37.8653	75508.3	83295.2	49266.4	0.906514	1.53265	27.524	123648	166715	67142.5	0.741675	1.84158	17.3625	256632	251934	84999.4	1.01865	3.01922
40.6692	145800	223017	159714	0.653761	0.912884	29.5712	209916	266016	135611	0.789111	1.54793	25.7754	429249	373140	147241	1.15037	2.91527	40.2094	76960.6	84854.3	49256.9	0.906974	1.56243	29.2584	126185	174616	69075.9	0.722642	1.82676	18.427	275602	273276	87591.6	1.00851	3.14644
43.0474	145892	223712	160238	0.652142	0.910469	31.3008	211709	269458	136004	0.785685	1.55664	27.2895	435427	378569	147270	1.15019	2.95666	42.5062	78804.4	86195.7	48996.3	0.914249	1.60837	30.9904	129841	181780	70448.4	0.714277	1.84307	19.508	293428	297974	90289.4	0.984744	3.24986
45.4322	146998	225489	161355	0.651908	0.911026	33.068	214776	271970	136759	0.789706	1.57048	28.8071	444879	383989	148264	1.15857	3.00058	44.8822	80306.7	87850.7	49556	0.914127	1.62052	32.7184	133704	190296	72633.2	0.702608	1.84081	20.5935	310680	323684	93286	0.959825	3.3304
47.8192	148115	226753	161324	0.653199	0.918121	34.804	216746	274794	136645	0.78876	1.5862	30.3205	451651	389697	147880	1.15898	3.05418	47.2593	81925.4	89052.1	49326.8	0.919971	1.66087	34.4168	137979	198638	73998.4	0.694626	1.86462	21.6745	328644	349872	96473	0.939326	3.40659
50.1952	148962	227661	162115	0.654314	0.918863	36.568	218405	275566	136765	0.792568	1.59694	31.836	460106	395344	148966	1.16381	3.08867	49.5561	83200.1	91204.5	49351.7	0.912236	1.68586	36.1536	142421	208582	76296.5	0.682805	1.86668	22.7545	343668	379146	100218	0.906427	3.42919
52.5767	149490	229329	163045	0.651858	0.916861	38.2648	220759	278170	137426	0.793611	1.60638	33.348	466953	399783	148707	1.16802	3.14008	51.8507	84679.5	92585.5	49310.8	0.914609	1.71726	37.82	147391	218949	78366.4	0.673177	1.8808	23.8425	355464	404058	104172	0.879735	3.41229
54.9538	150108	230485	163452	0.65127	0.918363	39.9976	223198	280722	137306	0.795082	1.62555	34.8607	472913	404396	149077	1.16943	3.17227	54.23	86391.4	94363.6	49854.5	0.915515	1.73287	39.4872	152594	229211	80758.6	0.665734	1.8895	24.924	366536	431024	107980	0.850384	3.39449
57.288	150435	231624	163889	0.649478	0.917905	41.7288	225051	283539	137656	0.793723	1.63488	36.3475	480730	409684	148986	1.17342	3.22669	56.6082	87672	96672.7	49607.5	0.906895	1.76731	41.2048	157841	242855	83509	0.64994	1.89011	25.985	374672	454334	111722	0.824662	3.3536
59.6673	151031	233298	164639	0.647373	0.917345	43.4368	227108	284441	137684	0.798434	1.64949	37.863	487376	414471	149631	1.1759	3.25717	58.9556	88767.2	98634.5	49939.6	0.89996	1.77749	42.9368	163318	255490	86217	0.639232	1.89426	27.066	381800	476862	116386	0.800651	3.28045
62.0444	152338	234574	165244	0.649426	0.9219	45.1664	229148	287072	137591	0.798222	1.66542	39.4037	494679	420239	150283	1.17714	3.29165	61.3756	90305.5	100048	50213.2	0.90262	1.79844	44.6672	169880	269689	90700.4	0.629911	1.87298	28.1485	388008	495904	119525	0.782426	3.24625
64.427	152685	235638	166454	0.647962	0.91728	46.9096	231384	288818	138540	0.801142	1.67016	40.8877	501199	424463	150121	1.18078	3.33862	63.7142	91972.7	102307	50107.2	0.898985	1.83552	46.4016	175188	283821	94519.2	0.617246	1.85346	29.233	391890	511106	122098	0.766749	3.20964
66.8063	153738	236749	166305	0.649372	0.924433	48.6384	232714	290470	138119	0.801163	1.68488	42.4151	506664	430286	150776	1.17751	3.36038	66.0902	92930.9	104871	50270.9	0.886146	1.8486	48.0688	178816	298368	99620.2	0.599315	1.79498	30.317	396192	527064	125385	0.751696	3.1598
69.1834	153912	237951	167074	0.646822	0.921221	50.3704	234159	292496	138455	0.800553	1.69123	43.932	513616	433850	151296	1.18386	3.39478	68.4684	94780.9	106415	50471.8	0.890669	1.8779	49.8016	179515	313930	105605	0.571831	1.69986	31.384	400398	543884	129491	0.736183	3.09209
71.5781	154962	238910	166671	0.64862	0.929747	52.1008	236402	294488	138168	0.802759	1.71098	45.4461	519124	437377	150909	1.1869	3.43999	70.851	95402.7	108743	50665.9	0.877325	1.88298	51.596	176735	324119	111404	0.545279	1.58643	32.4645	403876	558312	131826	0.723388	3.06371
73.9145	155315	240855	167023	0.644845	0.929901	53.8288	238431	295774	138254	0.806127	1.72459	46.9336	525091	442069	151129	1.18781	3.47447	73.1412	97393.6	111215	50987.2	0.875728	1.91016	53.3264	173109	327639	116517	0.528352	1.4857	33.5445	406810	571074	134713	0.71236	3.01982
76.3015	156518	242087	168184	0.646536	0.930639	55.5328	238898	297794	138724	0.802225	1.72211	48.4477	531083	446807	151391	1.18862	3.50801	75.5194	98493.6	113109	51452.5	0.870784	1.91426	55.0256	168754	328729	119758	0.513353	1.40912	34.633	411348	582582	137018	0.706077	3.00215
78.6808	156899	242422	168462	0.647215	0.931363	57.2616	241128	298995	138512	0.80646	1.74084	49.9884	536803	449899	151761	1.19316	3.53715	77.9031	99838.2	116048	51986.5	0.860317	1.92046	56.756	164580	328120	122263	0.501585	1.34611	35.7135	413690	593708	139670	0.69679	2.9619
81.059	157681	243776	169206	0.646826	0.931885	59.0064	243284	300112	138615	0.810642	1.7551	51.4794	543443	453921	151516	1.19722	3.58671	80.2813	101275	118280	52121	0.856227	1.94307	58.4888	160531	325769	124059	0.492777	1.29399	36.796	419224	605098	142650	0.69282	2.93884
83.4471	157997	244495	168724	0.64622	0.936426	60.736	244334	302171	138788	0.808594	1.76049	52.9928	547610	458079	152541	1.19545	3.58991	82.6584	102824	121269	52134.7	0.847896	1.97227	60.2168	157264	324109	125170	0.485219	1.2564	37.876	421196	615516	143990	0.684297	2.92518
85.8253	158830	245656	169536	0.646554	0.936849	62.5304	246669	304272	138496	0.810684	1.78105	54.516	552847	462377	153437	1.19566	3.60309	85.0399	104326	123277	52470.7	0.846274	1.98828	61.8984	154482	322608	126545	0.478856	1.22077	38.9565	424150	624528	146378	0.679153	2.89764
88.2024	158813	245845	169298	0.645986	0.938065	64.2592	248110	305154	138741	0.813066	1.78829	56.0028	558853	465247	152113	1.2012	3.67394	87.3862	105223	125448	52474.7	0.838774	2.00521	63.628	151875	321488	128055	0.472413	1.18601	40.038	427814	630470	147290	0.678564	2.90457
90.5872	159564	247228	169786	0.64541	0.939791	65.9872	249839	306599	139164	0.814872	1.79529	57.5155	564270	470746	153091	1.19867	3.68584	89.771	106972	129027	52907.5	0.829064	2.02186	65.36	149709	321901	129826	0.465077	1.15315	41.12	429594	635990	148809	0.675473	2.88689
92.9214	160238	248509	170459	0.644798	0.940039	67.7152	251072	308184	139092	0.814684	1.80508	59.0289	569831	474510	153646	1.20088	3.70874	92.1943	108174	131046	53340.8	0.825461	2.02797	67.0576	148632	322158	130921	0.461366	1.13528	42.2	433678	642264	149347	0.675233	2.90382
95.3029	160882	249523	170417	0.644758	0.944046	69.448	252175	309990	139071	0.813494	1.81328	60.5423	573779	477067	153519	1.20272	3.73752	94.5296	109456	133553	53851.6	0.819574	2.03255	68.7864	147228	323834	131950	0.454639	1.11578	43.283	437138	646428	150343	0.676236	2.90761
97.6844	161675	249674	170669	0.647544	0.947298	71.1488	253769	311090	138815	0.815741	1.82811	62.055	578830	479796	153820	1.20641	3.76303	96.8231	110918	136424	54300.9	0.813042	2.04266	70.524	146599	323605	133404	0.453018	1.09891	44.3445	438342	649650	150295	0.674736	2.91655
100.065	162119	250687	171122	0.646699	0.94739	72.8768	255588	312418	138792	0.818096	1.84151	63.5677	582240	482824	153459	1.2059	3.79412	99.176	112247	139298	54513.6	0.805806	2.05907	72.1936	146356	326452	134301	0.448323	1.08976	45.4335	438974	652608	151350	0.672646	2.90039
102.445	163122	251986	171432	0.647344	0.951526	74.6064	257124	312441	139156	0.822951	1.84773	65.0867	588243	486120	153954	1.21008	3.82089	101.553	113886	141605	55217.7	0.804251	2.0625	73.8664	145230	327188	136226	0.443874	1.06609	46.5135	442252	657640	150162	0.672483	2.94516
104.833	163264	252238	171100	0.64726	0.9542	76.336	257631	313982	138658	0.820527	1.85804	66.6036	592853	489041	153996	1.21228	3.8498	103.975	114958	144188	55456.2	0.797279	2.07296	75.5952	145255	329002	137375	0.441501	1.05736	47.5945	445066	657146	150903	0.677271	2.94935
107.209	164018	253851	171476	0.64612	0.956506	78.0648	258970	316160	138874	0.819111	1.86479	68.117	597633	493353	154640	1.21137	3.86467	106.307	115877	146728	55833.5	0.789741	2.07541	77.3304	144530	330001	137971	0.437968	1.04754	48.675	446980	659952	151472	0.677292	2.95091
109.585	164975	254895	171186	0.647224	0.963713	79.7968	260210	316510	139411	0.822123	1.86649	69.6885	602539	497257	155167	1.21172	3.88316	108.735	117555	149325	56356.4	0.787243	2.08593	79.0272	144182	331978	139169	0.434314	1.03603	49.756	449256	663670	151753	0.676927	2.96043
111.969	164839	255047	170858	0.646308	0.964771	81.528	261676	318596	138848	0.821341	1.88463	71.239	607839	500867	154753	1.21357	3.9278	111.133	118896	152515	56950.4	0.779569	2.08772	80.752	143939	333018	140656	0.432226	1.02334	50.845	453632	664316	151224	0.682856	2.99973
114.301	165592	255589	171361	0.647883	0.966334	83.264	262084	319421	138190	0.820496	1.89655	72.751	611634	503020	155296	1.21592	3.93851	113.509	120510	155101	57195.4	0.776978	2.10699	82.512	143499	333888	141476	0.429782	1.0143	51.925	456936	668320	152110	0.683708	3.00398
116.677	166318	256216	172197	0.649132	0.965858	84.992	263744	320370	139116	0.823247	1.89585	74.27	617229	507487	155670	1.21624	3.96498	115.808	121307	157835	57705.8	0.768568	2.10217	84.208	143305	337220	142764	0.42496	1.00379	53.045	458296	667694	151287	0.686386	3.02931
119.053	166845	257451	171776	0.648064	0.971289	86.72	265285	321385	138856	0.825443	1.9105	75.782	621496	510713	155259	1.21692	4.00297	118.184	122845	160818	58205.6	0.763878	2.11054	85.944	144191	338609	143619	0.425834	1.00399	54.125	459426	668964	151192	0.686772	3.0387
121.429	167185	257811	171523	0.648477	0.974708	88.432	266410	322971	138314	0.824872	1.92613	77.294	625814	513657	155679	1.21835	4.01991	120.56	124308	163653	58733.5	0.759585	2.11648	87.672	143724	341062	144858	0.4214	0.992173	55.185	460990	668792	150106	0.689288	3.0711
123.816	167756	258805	172605	0.648195	0.971912	90.16	267171	323502	139099	0.825871	1.92073	78.806	630900	516709	156376	1.221	4.03451	122.859	125713	165798	59305.5	0.758227	2.11975	89.408	143392	340619	144805	0.420977	0.990246	56.265	461774	670186	150732	0.689024	3.06354
126.192	169101	259550	172886	0.651516	0.978104	91.888	267718	325506	138854	0.822465	1.92805	80.325	635471	520313	156476	1.22133	4.06115	125.235	127343	168998	60104.6	0.753515	2.11868	91.144	144132	342121	145735	0.421291	0.989004	57.345	462184	670058	149774	0.689767	3.08588
128.568	169405	259947	172885	0.651688	0.979866	93.656	269400	326264	139148	0.825712	1.93608	81.816	637687	521754	157423	1.2222	4.05079	127.534	128548	172133	60621.8	0.746797	2.12049	92.872	144534	345685	147384	0.418108	0.980663	58.43	464340	671482	149630	0.691515	3.10326
130.955	170009	261041	172824	0.651274	0.983714	95.36	270372	326338	138912	0.828506	1.94635	83.328	642586	524486	157241	1.22517	4.08662	129.91	130062	174971	60952.6	0.743334	2.13382	94.6	144469	347066	149122	0.416257	0.968792	59.51	465914	672130	150157	0.69319	3.10285
133.331	169835	261687	173196	0.648998	0.98059	97.096	272186	325836	139005	0.835347	1.9581	84.84	644593	527287	157094	1.22247	4.10322	132.297	131280	177532	61627.9	0.739473	2.1302	96.304	144892	349871	150122	0.414131	0.965162	60.59	466274	672330	149534	0.69352	3.11818
135.729	170805	261495	173625	0.653189	0.983763	98.8	272225	327186	138256	0.832018	1.96899	86.359	649886	529763	156874	1.22675	4.14272	134.673	133019	180644	62659.5	0.736362	2.12289	98.032	145059	351214	150468	0.413021	0.964054	61.675	467866	671590	149157	0.696654	3.13673
138.105	170932	263118	173533	0.649639	0.985012	100.528	273538	329950	138875	0.829027	1.96967	87.871	652771	532720	157186	1.22536	4.15287	137.005	134678	183915	63462.2	0.732283	2.12218	99.768	145242	352098	151226	0.412506	0.960432	62.755	466552	670820	147990	0.695495	3.15259
140.492	171911	263355	174031	0.652771	0.987818	102.256	273984	329998	138211	0.83026	1.98235	89.383	657047	534551	157753	1.22916	4.16504	139.381	136494	187218	64509.5	0.729062	2.11587	101.512	146088	354572	151840	0.41201	0.962115	63.84	469102	672444	148331	0.697608	3.16254
142.824	172276	264256	173525	0.651929	0.992802	103.992	275248	330204	138271	0.833569	1.99063	90.909	660530	537934	157577	1.2279	4.19179	141.757	138315	190326	64878.5	0.726723	2.1319	103.248	146364	356000	152084	0.411134	0.962389	64.92	469852	670956	147899	0.700272	3.17685
145.2	173031	264855	173705	0.653305	0.996122	105.72	276634	330949	138438	0.835881	1.99826	92.421	663327	539500	157693	1.22952	4.20645	144.144	139672	194213	65939.5	0.719169	2.11818	104.944	146446	357730	153146	0.409376	0.956251	66	470472	673028	148197	0.699038	3.17464
147.598	173593	265915	174196	0.652814	0.996535	107.456	277369	331798	138261	0.835958	2.00612	93.961	665904	541040	157670	1.23079	4.22341	146.52	141580	197881	65964.3	0.715481	2.14631	106.672	146891	359428	154592	0.408681	0.950184	67.08	470678	675512	148519	0.696772	3.16915
149.974	174054	266433	174236	0.653274	0.998951	109.184	278511	332141	138141	0.838533	2.01613	95.501	669410	543329	157521	1.23205	4.24964	148.896	144232	201945	67156.5	0.714212	2.1477	108.432	146762	360865	154625	0.406696	0.949151	68.16	473178	678080	148348	0.69782	3.18964
152.35	174380	266528	174557	0.654265	0.998984	110.896	278834	332388	138059	0.838882	2.01967	97.013	674163	546731	158180	1.23308	4.262	151.338	145888	205790	67793	0.708918	2.15197	110.128	147910	362039	155516	0.408547	0.95109	69.245	475016	676540	148506	0.702126	3.19864
154.726	174173	267002	174052	0.652328	1.00069	112.624	280046	333202	137995	0.840469	2.02939	98.532	675049	547519	158363	1.23292	4.26267	153.758	147672	209904	68649.5	0.703522	2.1511	111.856	147424	364112	156442	0.404885	0.942351	70.305	473474	674914	147860	0.701532	3.20219
157.113	175500	267714	173891	0.655551	1.00925	114.352	280694	334401	138081	0.839392	2.03282	100.016	678576	549386	157791	1.23515	4.30046	156.134	150969	215948	69572.7	0.699099	2.16995	113.592	147891	365138	155855	0.405029	0.948903	71.385	475716	676992	147355	0.702691	3.22836
159.456	175811	268143	174377	0.655662	1.00822	116.08	282401	335454	137621	0.841849	2.05202	101.535	681257	551126	158291	1.23612	4.30382	158.51	153738	221749	71578.9	0.693298	2.14781	115.32	148389	367332	157545	0.403963	0.941882	72.465	474262	677012	147582	0.700522	3.21355
161.832	175884	268947	174406	0.653971	1.00847	117.824	282652	335274	137881	0.84305	2.04997	103.054	682790	553373	157566	1.23387	4.33337	160.853	159080	231123	74156.1	0.688292	2.1452	117	148804	368015	157509	0.404342	0.944733	73.545	475764	675670	147011	0.704137	3.23625
164.208	176707	268692	174009	0.657658	1.01551	119.552	283508	336329	137498	0.842948	2.06191	104.566	685981	555023	158120	1.23595	4.33836	163.229	163591	246072	79236.4	0.66481	2.06459	118.712	148516	369715	158025	0.401705	0.939828	74.63	474590	675974	147196	0.702083	3.2242
166.584	177257	269769	174190	0.65707	1.01761	121.288	283742	336528	137408	0.843148	2.06497	106.071	687960	556566	157416	1.23608	4.37034	165.605	160343	264834	88609	0.605447	1.80955	120.472	149606	370941	158480	0.403315	0.944007	75.71	476008	677968	147549	0.70211	3.2261
168.982	177538	269517	173834	0.658727	1.02131	122.984	285238	338226	137032	0.843333	2.08153	107.583	693931	558774	157994	1.24188	4.39213	168.036	147656	277934	99463.6	0.531265	1.48453	122.176	150228	372949	159615	0.40281	0.941187	76.795	475780	676538	146845	0.703257	3.24002
171.358	178278	270248	173995	0.659683	1.02462	124.72	285132	337242	137080	0.845482	2.08004	109.102	695679	561891	158550	1.2381	4.38776	170.379	133321	276736	107398	0.481761	1.24137	123.904	150441	373842	160111	0.402419	0.939604	77.875	476248	678340	146703	0.702079	3.24635
173.745	178376	270938	174252	0.658366	1.02367	126.448	285502	338550	136711	0.84331	2.08836	110.614	698494	563991	158824	1.23848	4.39791	172.755	124191	269838	110241	0.460242	1.12654	125.632	149899	375065	160054	0.399661	0.936553	78.955	475846	679770	146940	0.70001	3.23837
176.077	178777	271304	174144	0.658956	1.02661	128.176	287618	338415	136969	0.849896	2.09988	112.126	703651	566483	158724	1.24214	4.43317	175.142	119046	265143	112412	0.44899	1.05902	127.36	150945	376682	160790	0.400722	0.938771	80.035	476360	678844	146426	0.701722	3.25326
178.464	179222	271942	174034	0.659045	1.02981	129.904	288014	340451	136695	0.845976	2.10698	113.638	706406	567856	159164	1.24399	4.43822	177.518	114975	262360	113891	0.438232	1.00951	129.088	151520	378160	161539	0.400677	0.937979	81.12	478862	679848	146668	0.704366	3.26495
180.84	179623	272518	174571	0.659122	1.02894	131.64	288259	339609	136668	0.848797	2.1092	115.15	706254	569944	159271	1.23916	4.43428	179.894	112301	261921	115716	0.428759	0.970484	130.824	151685	378706	161521	0.400535	0.939102	82.2	478956	683098	147141	0.701153	3.25508
183.26	179765	272153	174235	0.660532	1.03174	133.376	289222	340629	136620	0.849084	2.11699	116.662	709383	571719	159314	1.24079	4.45273	182.237	110731	261805	117709	0.422951	0.940717	132.528	152002	380720	161652	0.39925	0.940304	83.28	480774	686314	147811	0.700516	3.25264
185.592	180569	273434	174895	0.660376	1.03245	135.104	289765	340646	136230	0.850633	2.12703	118.181	712071	572460	159191	1.24388	4.47305	184.657	109458	262475	119288	0.417024	0.917595	134.256	151831	382119	162212	0.39734	0.936002	84.36	482618	689422	148486	0.700033	3.25027
187.968	180676	273199	174161	0.661336	1.03741	136.832	289988	341985	136646	0.847954	2.12218	119.693	713547	573479	159171	1.24424	4.48288	186.989	108144	263089	120883	0.411053	0.894616	135.936	152001	382566	162442	0.39732	0.935723	85.425	482266	688194	148318	0.70077	3.25157
190.355	181395	273405	174629	0.663464	1.03874	138.536	291002	341690	136408	0.851656	2.13333	121.261	717037	575611	158933	1.2457	4.51157	189.365	107219	264674	123091	0.405099	0.871056	137.664	153121	383412	163590	0.399364	0.936006	86.505	483480	689162	148388	0.701548	3.25822
192.731	182135	274386	174664	0.663792	1.04278	140.264	291365	342326	136276	0.851133	2.13805	122.773	717776	575611	159081	1.24698	4.512	191.752	107172	265770	125245	0.40325	0.855694	139.408	152446	383875	163169	0.397125	0.934286	87.585	483110	690890	147928	0.699257	3.26585
195.107	182473	275010	175105	0.663513	1.04208	142	292972	342855	136555	0.854508	2.14545	124.285	721206	576867	158886	1.25021	4.53915	194.128	106742	267982	126998	0.398317	0.840499	141.104	153099	385938	163732	0.396693	0.935054	88.67	484666	693360	147983	0.699011	3.27515
197.483	182911	275116	174659	0.664849	1.04725	143.728	293902	343170	135875	0.856434	2.16304	125.804	722343	579439	159723	1.24663	4.52248	196.504	106258	269017	129189	0.394986	0.822501	142.832	154121	388050	164321	0.397169	0.937926	89.77	486636	694380	148495	0.700821	3.27712
199.87	183465	274956	174375	0.667253	1.05213	145.456	294312	343602	135798	0.856549	2.16729	127.288	724986	579161	158170	1.25179	4.58359	198.803	105504	271233	129978	0.388978	0.811703	144.576	154574	391336	166282	0.39499	0.929585	90.835	486704	694136	148875	0.701165	3.26921
202.213	182990	275462	174926	0.664303	1.0461	147.184	294699	344359	135686	0.85579	2.17191	128.807	724870	581390	159413	1.24679	4.54712	201.102	105852	272739	132080	0.388107	0.801422	146.304	155385	392354	166836	0.396033	0.931362	91.92	485526	694628	148187	0.698973	3.27645
204.6	183955	276067	175086	0.66634	1.05065	148.912	294514	344286	136054	0.855433	2.16469	130.326	728139	581769	159226	1.25159	4.573	203.39	105905	274438	134497	0.385899	0.787417	148.032	154938	392871	167264	0.394372	0.926307	93	486088	693408	148238	0.701013	3.27911
206.976	184207	276254	174811	0.666805	1.05375	150.672	294582	345131	135968	0.853538	2.16657	131.838	728787	583353	158951	1.24931	4.58497	205.733	105284	276658	135911	0.380555	0.774652	149.768	155389	393292	166458	0.395097	0.933504	94.065	487280	696178	148034	0.699936	3.29167
209.352	184665	276094	174381	0.668851	1.05898	152.44	296316	345186	135486	0.858424	2.18706	133.364	732323	585107	158436	1.2516	4.62221	208.021	105390	278261	137853	0.378745	0.764512	151.472	155099	392916	165694	0.394737	0.936057	95.15	488374	695496	148270	0.702195	3.29381
211.728	184690	276345	174316	0.66833	1.05951	154.168	296891	346065	135372	0.857906	2.19314	134.855	733807	585621	158450	1.25304	4.63116	210.408	105530	279871	138955	0.377067	0.759452	153.2	155412	392305	166404	0.396152	0.933948	96.23	487878	696322	148471	0.70065	3.28602
214.104	185929	276899	174808	0.671469	1.06362	155.904	296791	346216	135525	0.857242	2.18994	136.367	737610	587096	159576	1.25637	4.62232	212.784	105023	281204	140653	0.373476	0.746681	154.88	155526	392656	166008	0.396088	0.936863	97.315	488780	696996	148999	0.701267	3.28042
216.491	186093	277673	174376	0.670187	1.06719	157.632	297782	346809	136056	0.858636	2.18867	137.886	739503	588933	158864	1.25567	4.65493	215.094	105508	282551	141932	0.373413	0.743372	156.552	156001	394639	166871	0.395301	0.93486	98.395	489412	700614	148423	0.698547	3.29741
218.867	186080	278043	174861	0.66925	1.06416	159.36	298651	346632	135114	0.861579	2.21037	139.412	739324	588963	159040	1.2553	4.64867	217.437	105380	284024	143415	0.371025	0.734788	158.28	156508	396275	167170	0.394947	0.936218	99.475	488356	699312	148269	0.698338	3.29373
221.265	185922	278682	175115	0.667147	1.06172	161.088	298495	347748	134786	0.858367	2.21458	140.896	741274	590364	159050	1.25562	4.66064	219.813	105074	286662	144384	0.366542	0.727739	159.984	156431	397235	167195	0.3938	0.935622	100.555	488292	699074	148013	0.698484	3.29898
223.641	186795	277600	175238	0.672891	1.06595	162.792	299299	349482	135341	0.856406	2.21144	142.408	743449	590697	159039	1.2586	4.67464	222.189	105234	286311	146440	0.36755	0.718613	161.656	156694	397336	167316	0.394361	0.936512	101.635	489966	699756	148972	0.700195	3.28897
225.984	187109	278504	174652	0.671837	1.07133	164.528	300134	348931	134984	0.860152	2.22348	143.927	745121	592999	159103	1.25653	4.68327	224.576	105243	287890	147270	0.365566	0.714624	163.384	156556	396302	166335	0.395042	0.941211	102.715	490400	699208	148014	0.701365	3.31321
228.36	187264	279140	175025	0.670859	1.06993	166.256	300504	348095	134482	0.863281	2.23452	145.446	746316	594267	158711	1.25586	4.70234	226.875	105119	290378	149030	0.362008	0.705355	165.12	155918	395226	166239	0.394502	0.937913	103.795	489732	699568	148401	0.700049	3.30005
230.736	187839	279830	175016	0.671261	1.07327	167.984	300768	348592	134752	0.862805	2.232	146.965	748737	593656	158569	1.26123	4.72185	229.174	105071	290717	149576	0.36142	0.702457	166.848	157258	396944	166402	0.396171	0.945043	104.88	488834	700502	148725	0.697834	3.28683
233.112	188634	279855	174319	0.674042	1.08212	169.72	301986	349904	135099	0.863055	2.2353	148.477	749271	594100	158559	1.26119	4.72552	231.55	105981	293886	151077	0.360619	0.701501	168.576	156688	397398	166566	0.394284	0.940692	105.96	490174	703366	148335	0.696897	3.30452
235.488	188634	280023	174928	0.673637	1.07835	171.448	302459	349721	134698	0.864857	2.24547	150.045	751043	596526	158351	1.25903	4.74289	233.893	106030	295913	153070	0.358315	0.69269	170.24	156025	397200	166458	0.392812	0.937326	107.08	490074	701688	148378	0.698422	3.30288
237.875	189109	279503	174402	0.676591	1.08433	173.176	302261	350290	134755	0.862889	2.24304	151.557	752636	595897	157954	1.26303	4.7649	236.269	106360	298799	155422	0.355958	0.684331	171.968	156569	397134	166750	0.394247	0.938943	108.145	490362	701058	148370	0.69946	3.30499
240.251	189331	280196	174265	0.675708	1.08645	174.912	303226	350029	133512	0.86629	2.27115	153.069	754234	596656	157743	1.2641	4.78142	238.667	106552	300277	156516	0.354845	0.680771	173.728	157475	398278	166878	0.39539	0.943656	109.23	488840	698808	148796	0.699534	3.2853
242.627	189871	281768	174510	0.673855	1.08802	176.64	303844	349750	133944	0.868746	2.26844	154.588	755777	598431	158294	1.26293	4.77451	241.054	106386	301662	157354	0.352668	0.676097	175.424	157646	400009	167584	0.394107	0.940701	110.315	490538	700768	147887	0.700001	3.31699
245.014	190201	280949	174255	0.676994	1.09151	178.376	304170	350680	133921	0.867372	2.27126	156.1	755393	597411	157486	1.26444	4.79658	243.43	106695	302553	158949	0.352648	0.67125	177.152	157305	400195	167336	0.393071	0.940053	111.395	489016	701178	148252	0.697421	3.29855
247.39	191175	280835	174000	0.680737	1.0987	180.104	304796	351890	133985	0.866169	2.27485	157.612	756689	597540	157461	1.26634	4.80555	245.806	106933	304275	159891	0.351435	0.668786	178.88	157280	400644	167398	0.392568	0.93956	112.475	489694	700936	147984	0.698629	3.3091
249.766	190835	280755	173250	0.67972	1.1015	181.832	304415	351130	134289	0.866958	2.26687	159.11	758226	599861	158153	1.264	4.79426	248.182	107746	305410	160608	0.352793	0.670865	180.616	157855	402050	167098	0.392625	0.944688	113.555	490282	701322	148656	0.699083	3.2981
252.142	190361	280489	172901	0.678675	1.10098	183.536	305156	352248	133426	0.866312	2.28708	160.629	759601	599623	157024	1.2668	4.83748	250.58	107187	306164	161333	0.350098	0.664386	182.352	157675	401819	167881	0.392403	0.939206	114.635	491412	703746	148199	0.69828	3.31589
254.529	191714	280422	172743	0.683662	1.10982	185.264	306169	352234	133392	0.86922	2.29525	162.148	758936	597954	157484	1.26922	4.81912	252.923	107207	307075	162566	0.349125	0.659468	184.048	157846	401810	167466	0.392838	0.942556	115.715	492938	706602	149173	0.697618	3.30447
256.872	191150	281226	172373	0.679702	1.10893	187.008	306680	352499	133774	0.870017	2.29253	163.66	760596	598899	157033	1.26999	4.84355	255.31	107318	308524	163084	0.347844	0.658056	185.776	158115	402468	167830	0.392864	0.942114	116.785	494006	705840	148866	0.699884	3.31846
259.248	192062	280933	173139	0.683658	1.10929	188.736	306186	351698	133674	0.870595	2.29055	165.151	762341	599629	157047	1.27136	4.85422	257.598	107230	308632	163738	0.347437	0.654887	187.504	158046	402599	168222	0.392565	0.939507	117.87	494414	707528	148521	0.698791	3.32891
261.624	192353	281889	172535	0.68237	1.11486	190.472	306569	351954	132934	0.871048	2.30618	166.663	761576	599764	156994	1.26979	4.85098	259.974	107586	309533	164885	0.347577	0.652492	189.24	158180	402098	167520	0.393387	0.944245	118.955	493480	706384	148680	0.6986	3.31907
264	192806	281106	171975	0.685884	1.12113	192.2	307289	352939	132959	0.870657	2.31116	168.182	761790	600126	156876	1.26938	4.85601	262.35	107799	311132	165121	0.346474	0.652849	190.968	158055	403518	167965	0.391693	0.941	120.035	493026	706018	148199	0.698319	3.32678
266.376	192357	281327	171922	0.683749	1.11886	193.896	307780	352581	131905	0.872934	2.33335	169.722	763581	600947	155647	1.27063	4.90585	264.693	108021	311609	165928	0.346655	0.65101	192.712	158465	405044	167644	0.391229	0.945248	121.08	493782	708046	148208	0.697387	3.33168
268.763	192684	281967	172045	0.683355	1.11996	195.624	307331	351915	132520	0.873311	2.31913	171.213	765627	601017	156307	1.27389	4.89822	267.113	108055	313305	166840	0.344889	0.647659	194.416	158361	403606	167881	0.392366	0.943293	122.145	495864	709062	149276	0.699324	3.3218
271.139	193115	281624	171693	0.685722	1.12477	197.36	309059	352826	132189	0.875952	2.33801	172.725	766354	601781	156506	1.27348	4.89665	269.456	108240	314398	167263	0.344277	0.647126	196.152	158448	403731	166952	0.392458	0.949057	123.225	496920	711026	149344	0.698877	3.32736
273.57	193705	281717	171356	0.687588	1.13042	199.088	308556	353751	132181	0.872241	2.33434	174.237	768424	602594	156137	1.27519	4.92147	271.832	108470	315638	168603	0.343653	0.643347	197.824	157729	403369	167186	0.391029	0.943431	124.27	498088	713146	149275	0.698438	3.33671
275.957	193491	282687	172025	0.68447	1.12478	200.816	309080	352621	131471	0.876521	2.35093	175.749	768874	603576	156484	1.27387	4.91343	274.208	108330	316066	169419	0.342744	0.63942	199.56	157722	403014	167605	0.391358	0.941037	125.355	497906	712936	149196	0.698388	3.33726
278.344	194035	281885	171888	0.688348	1.12884	202.552	309332	353056	131266	0.876156	2.35653	177.268	771290	604363	156909	1.2762	4.91554	276.595	109165	316634	169907	0.344769	0.6425	201.296	158522	403626	168011	0.392746	0.943523	126.435	498252	714250	150230	0.697588	3.3166
280.72	193873	282156	171826	0.687111	1.12831	204.28	308921	352225	130919	0.877057	2.35964	178.752	770469	602994	156306	1.27774	4.92924	278.971	108964	317334	170055	0.343372	0.640757	203.024	157956	403664	167590	0.391307	0.942516	127.515	497578	715022	149526	0.695892	3.32771
283.107	194262	282304	171882	0.688131	1.13021	206.008	309940	352981	131462	0.878064	2.35763	180.278	770106	605016	155260	1.27287	4.9601	281.347	109271	318435	170759	0.34315	0.639913	204.752	157815	403521	167139	0.391095	0.944216	128.595	499086	714192	149007	0.698812	3.34941
285.472	194381	282600	171565	0.687831	1.13298	207.736	309878	353061	131215	0.877688	2.3616	181.79	771474	604279	155281	1.27669	4.96823	283.646	109335	319467	171375	0.342243	0.637988	206.456	158794	404268	167496	0.392794	0.948044	129.675	498390	715652	149454	0.696414	3.33473
287.859	194911	282770	171666	0.689291	1.13541	209.472	309379	352780	130992	0.876974	2.36181	183.309	774489	604026	155249	1.28221	4.9887	286.022	108869	320219	171968	0.339983	0.633077	208.184	158218	405195	167419	0.390472	0.945041	130.755	499768	715892	149128	0.698105	3.35126
290.213	195535	283562	171845	0.689566	1.13786	211.2	310286	353326	130898	0.878186	2.37045	184.828	774656	605839	155560	1.27865	4.97979	288.365	109541	321646	172406	0.340563	0.635365	209.912	157931	403160	167778	0.391733	0.941314	131.82	499752	716510	149573	0.697481	3.34119
292.589	195416	283772	171991	0.688639	1.1362	212.928	310695	352688	130595	0.880936	2.37907	186.34	775414	605721	154991	1.28015	5.00295	290.752	109614	321970	173976	0.340447	0.630049	211.672	157815	403960	167502	0.39067	0.942165	132.905	498488	716630	149478	0.6956	3.33485
294.987	195789	283445	171495	0.690747	1.14166	214.72	311572	353230	130720	0.882067	2.38351	187.831	774660	605559	154520	1.27925	5.01333	293.128	109755	323021	174404	0.339775	0.629313	213.368	157815	403325	167580	0.391285	0.941729	133.985	499874	715156	149469	0.698972	3.34433
297.363	195652	283369	171151	0.690449	1.14315	216.456	311342	353320	130070	0.881191	2.39365	189.343	775911	603107	154574	1.28652	5.01967	295.504	109853	323845	174560	0.339214	0.629312	215.104	157960	402305	166036	0.392637	0.951359	135.065	498132	716570	150568	0.695162	3.30836
299.739	196194	283374	171257	0.69235	1.14561	218.152	311738	353578	130192	0.881667	2.39444	190.862	775173	604844	154664	1.28161	5.01197	297.88	110170	324158	174923	0.339865	0.629821	216.768	157669	402329	165865	0.39189	0.950585	136.11	497654	717384	149230	0.693707	3.33482
302.126	196445	283230	171392	0.693587	1.14617	219.888	311935	353790	130181	0.881695	2.39616	192.374	776243	605383	154531	1.28223	5.0232	300.256	109936	325696	175965	0.337542	0.624764	218.496	157582	402299	166110	0.391705	0.948664	137.195	498702	716420	149466	0.696103	3.33656
304.469	196704	284388	171298	0.691673	1.14831	221.616	311489	353331	129495	0.881577	2.40541	193.893	776823	606914	153990	1.27995	5.04463	302.654	109878	326236	176176	0.336805	0.623683	220.232	157518	402112	166399	0.391725	0.946627	138.28	498688	714590	149490	0.697866	3.33594
306.9	197135	284065	171725	0.693976	1.14796	223.344	312180	353626	129682	0.882796	2.40726	195.405	777316	606340	154216	1.28198	5.04044	305.03	110299	326122	176251	0.338214	0.625807	221.936	157352	402678	166140	0.390766	0.947108	139.36	498374	715268	148655	0.696765	3.35256
309.232	197269	284274	170945	0.693941	1.15399	225.072	312342	353262	129622	0.884165	2.40963	196.917	778779	604880	153830	1.28749	5.06259	307.406	110170	326759	176670	0.33716	0.623592	223.664	156942	401738	166154	0.390659	0.944562	140.425	498064	713818	148714	0.697746	3.34915
311.608	197120	284265	171050	0.693436	1.15241	226.808	312694	353899	128890	0.883568	2.42605	198.429	777327	604399	153206	1.28612	5.07375	309.782	110955	326985	176883	0.339327	0.627277	225.336	156920	402360	165508	0.389999	0.948114	141.5	497748	715308	148841	0.695851	3.34416
313.984	197055	285139	170867	0.691085	1.15327	228.544	313670	353065	129370	0.88842	2.4246	199.941	777036	603099	152271	1.28841	5.10296	312.125	110694	327779	177560	0.337708	0.623415	227.056	157532	401562	165709	0.392299	0.950659	142.605	497920	715432	148079	0.695971	3.36253
316.404	197684	285091	170906	0.693406	1.15668	230.272	312469	353246	128795	0.884564	2.42609	201.453	776046	603253	152434	1.28644	5.09102	314.413	111206	329017	178394	0.337996	0.623376	228.792	156569	398660	164478	0.392738	0.951916	143.67	498108	715380	148794	0.696284	3.34763
318.747	198719	284658	170714	0.698097	1.16405	232.064	313671	353091	128509	0.888357	2.44086	202.965	776867	603867	152106	1.28649	5.10742	316.8	111277	329087	178753	0.338139	0.622521	230.52	156241	398141	163800	0.392427	0.953854	144.75	497836	716146	148717	0.69516	3.34754
321.134	198590	285569	170750	0.695418	1.16305	233.768	314242	353156	128185	0.889812	2.45148	204.533	775876	603089	152283	1.2865	5.09496	319.088	111247	330193	179076	0.336916	0.621228	232.248	156009	398358	163610	0.39163	0.95354	145.83	497082	714000	147843	0.696193	3.36222
323.51	198250	285912	170377	0.693396	1.16359	235.504	313356	353748	128550	0.885819	2.43762	206.052	777704	601703	151931	1.29251	5.11878	321.464	111151	330685	179336	0.336123	0.61979	233.984	156888	398692	164212	0.393505	0.955393	146.915	497596	714616	148633	0.696312	3.34782
325.853	198828	285915	170293	0.695409	1.16757	237.24	313808	353362	127775	0.888061	2.45594	207.536	777927	603057	151434	1.28997	5.13706	323.84	110905	331098	179765	0.334962	0.616945	235.648	156068	400539	165268	0.389644	0.944333	147.995	500170	716752	148572	0.697829	3.36652
328.24	198659	285253	170494	0.696432	1.1652	238.968	314288	353300	127572	0.889577	2.4636	209.048	778927	603206	151773	1.29131	5.13219	326.216	110873	331560	180256	0.334397	0.615084	237.392	157008	401088	165249	0.391454	0.950128	149.075	500702	715388	149020	0.699903	3.35997
330.638	199530	285925	169802	0.697841	1.17508	240.704	314008	353265	127729	0.888872	2.45839	210.567	777666	602566	151403	1.29059	5.1364	328.603	111615	332616	180423	0.335568	0.618633	239.088	156684	401411	164221	0.390332	0.954102	150.155	498630	717344	149197	0.695106	3.3421
333.014	199806	285683	169751	0.6994	1.17706	242.432	314194	352879	126980	0.890373	2.47436	212.079	778990	603096	151141	1.29165	5.15405	330.891	111902	332656	181014	0.336389	0.618196	240.816	156284	400605	164618	0.390119	0.949375	151.235	499564	718012	149331	0.69576	3.34535
335.39	199699	285686	169251	0.699015	1.1799	244.16	314458	353231	127354	0.890231	2.46917	213.605	778426	601133	150666	1.29493	5.16658	333.267	111369	332622	180940	0.334822	0.615503	242.544	157020	401792	164602	0.390799	0.953934	152.315	499756	718392	149463	0.695659	3.34367
337.733	199892	285714	169332	0.699623	1.18047	245.864	314118	352670	126702	0.890684	2.47917	215.117	777524	601497	149783	1.29265	5.19101	335.643	111969	333287	181547	0.335954	0.616749	244.28	156448	401188	164215	0.389961	0.952699	153.4	500166	718478	148810	0.696147	3.36111
340.109	200540	286178	168981	0.700752	1.18676	247.592	315260	353181	126436	0.892629	2.49343	216.608	777691	601136	149477	1.2937	5.20274	338.03	112176	333974	181613	0.335884	0.617668	246.008	156469	400479	164024	0.390704	0.95394	154.435	500288	720228	149119	0.694624	3.35496
342.496	200795	286252	169191	0.701464	1.1868	249.328	315162	352969	126465	0.892891	2.49209	218.12	779043	600759	149780	1.29677	5.20125	340.406	112160	334599	182265	0.335207	0.615369	247.68	156158	400248	164310	0.390152	0.950383	155.5	501424	720564	148722	0.695877	3.37156
344.916	200715	286531	168554	0.700502	1.19081	251.056	316296	352888	125562	0.896309	2.51903	219.639	778621	599520	150290	1.29874	5.18079	342.782	112591	335293	182516	0.335799	0.616881	249.408	156666	398982	163576	0.392664	0.957757	156.585	499950	719834	149206	0.694535	3.35073
347.259	201339	286401	168445	0.702997	1.19528	252.792	315011	353246	126044	0.891761	2.49922	221.158	777990	599309	149230	1.29815	5.21336	345.125	112505	335557	182783	0.335279	0.615515	251.144	155998	398450	162705	0.391511	0.958775	157.625	500514	721450	148762	0.693761	3.36452
349.635	200740	286687	168711	0.700205	1.18985	254.528	315328	352244	125619	0.895197	2.51019	222.67	776613	600179	149247	1.29397	5.20354	347.501	112220	336228	182408	0.333761	0.615214	252.848	156334	398570	162698	0.392237	0.960886	158.67	500540	719910	148816	0.695281	3.36349
352.011	201424	286017	168844	0.704236	1.19296	256.256	315079	352715	125320	0.893296	2.51419	224.21	778849	599826	149853	1.29846	5.19742	349.888	112534	336604	183350	0.334321	0.613764	254.584	156195	399862	163010	0.390622	0.958193	159.755	499480	720524	148505	0.693218	3.36339
354.398	201376	286536	168281	0.702795	1.19667	257.984	315908	352504	125245	0.896182	2.52232	225.701	778031	600349	148934	1.29597	5.22399	352.264	112340	337537	183706	0.332823	0.611519	256.256	155919	398078	162168	0.391679	0.961467	160.84	499668	718758	149098	0.695183	3.35128
356.774	201802	286492	168178	0.704389	1.19993	259.744	316322	352154	124796	0.898251	2.53472	227.213	779010	598560	148486	1.30147	5.24636	354.651	112126	337680	184329	0.332049	0.608294	257.992	156104	399506	163021	0.390742	0.957567	161.92	499396	718760	148147	0.694802	3.37094
359.15	201672	286759	167682	0.70328	1.20271	261.44	316576	353028	124638	0.896747	2.53996	228.725	778380	597826	147860	1.30202	5.2643	357.027	112666	338008	184222	0.333324	0.61158	259.72	155314	398196	162815	0.390043	0.953928	163	499750	718882	148540	0.695177	3.36441
361.493	201653	287046	167801	0.702509	1.20174	263.168	316789	353226	124462	0.896844	2.54527	230.216	776489	596447	147963	1.30186	5.24786	359.414	113348	338344	184996	0.335009	0.612705	261.448	155978	397794	162486	0.392106	0.959943	164.065	497624	717314	147863	0.693732	3.36543
363.88	202243	286796	167845	0.705179	1.20493	264.896	315805	353509	124640	0.893344	2.53373	231.728	778149	599769	147546	1.29741	5.27395	361.79	112947	339545	184677	0.332643	0.611593	263.152	155595	395661	161705	0.393253	0.962215	165.145	498490	717112	147640	0.695135	3.3764
366.245	202692	286896	167665	0.706498	1.20891	266.624	317074	351835	123898	0.9012	2.55915	233.247	777673	598106	147537	1.30023	5.27103	364.144	112947	339319	185354	0.332864	0.609361	264.824	155291	394544	160952	0.393597	0.964827	166.185	497706	717210	147919	0.693947	3.36472
368.632	203213	287187	167083	0.707597	1.21624	268.352	317032	352571	123798	0.899201	2.5609	234.759	779237	596500	147434	1.30635	5.28532	366.564	113277	340290	185770	0.332885	0.609772	266.56	155360	397106	161401	0.39123	0.96257	167.23	496912	715984	147425	0.694027	3.3706
370.997	202527	286865	167691	0.706001	1.20774	270.088	317091	352580	123475	0.899346	2.56807	236.271	779653	596360	146560	1.30735	5.31968	368.907	113714	341225	186375	0.333251	0.610135	268.288	154416	394799	160544	0.391126	0.961833	168.315	497182	715180	146903	0.695184	3.38443
373.384	202680	287422	167102	0.705166	1.21291	271.792	316936	351831	123474	0.900819	2.56682	237.783	779616	598186	146844	1.3033	5.30913	371.294	112945	341235	186633	0.330988	0.60517	270.048	155080	394142	159831	0.393462	0.970273	169.395	496944	714702	147102	0.695316	3.37822
375.804	203121	287579	167074	0.706313	1.21576	273.52	317872	351344	122984	0.904734	2.58466	239.302	778849	597107	146654	1.30437	5.31078	373.67	113394	341850	187272	0.331706	0.605503	271.816	155145	394974	160199	0.392798	0.968453	170.475	496502	715880	147500	0.693555	3.36612
378.147	203546	286708	166452	0.709943	1.22285	275.256	318235	351596	123238	0.905115	2.58228	240.814	778683	596224	146597	1.30602	5.31172	376.046	113705	342384	187241	0.332097	0.607263	273.52	154231	395061	159764	0.390398	0.965371	171.555	496512	715870	147710	0.693578	3.3614
380.523	203563	287198	166091	0.708788	1.22561	276.984	318282	353429	122388	0.900556	2.6006	242.333	777453	595290	145863	1.30601	5.33003	378.422	113723	343497	187905	0.331073	0.605212	275.248	154834	395151	160429	0.391834	0.965125	172.6	494748	712940	147027	0.693955	3.36501
382.91	204107	287246	165605	0.710565	1.23249	278.712	317601	352580	122537	0.900792	2.59188	243.845	776847	593101	145694	1.3098	5.33204	380.776	113683	343774	187823	0.330691	0.605266	276.976	154158	393800	159449	0.391461	0.966815	173.68	495144	712992	146100	0.694459	3.38908
385.286	203616	287148	165687	0.709099	1.22892	280.448	318002	352379	122186	0.902445	2.60261	245.357	777074	593700	145443	1.30887	5.34282	383.152	113899	343517	187917	0.331567	0.606113	278.704	154649	394029	159245	0.392481	0.971137	174.76	493840	712488	146533	0.69312	3.37016
387.662	204295	287184	164835	0.711376	1.23939	282.176	317399	351958	121973	0.90181	2.6022	246.876	775974	593481	145403	1.3075	5.33672	385.55	114080	345082	188845	0.330588	0.604092	280.432	154446	393338	160002	0.392656	0.965274	175.825	493880	712256	146844	0.693402	3.3633
390.016	204319	287531	165003	0.710599	1.23828	283.904	318081	352089	121858	0.903412	2.61026	248.36	777534	591926	144753	1.31357	5.37146	387.904	114058	345167	189582	0.330443	0.60163	282.168	154184	392960	159634	0.392365	0.965859	176.905	493316	712260	146643	0.692607	3.36407
392.392	204535	286928	164611	0.712845	1.24254	285.616	318305	351000	121351	0.906852	2.62301	249.872	778530	592631	144650	1.31368	5.38216	390.203	114273	345655	189656	0.330597	0.602525	283.832	154584	392792	158959	0.393551	0.972477	177.985	494938	712848	146592	0.694311	3.37629
394.779	204758	286941	164827	0.71359	1.24226	287.344	319062	351171	120864	0.908567	2.63984	251.384	777747	590960	144149	1.31607	5.39546	392.59	114138	345937	190318	0.329939	0.599723	285.56	153790	392330	158725	0.391991	0.968908	179.085	495716	712284	144805	0.695953	3.42333
397.166	204444	286632	164165	0.713262	1.24536	289.08	318600	352042	121390	0.905004	2.62461	252.903	776500	592436	144270	1.31069	5.38227	394.878	114786	346564	190078	0.331213	0.60389	287.288	154169	392286	158642	0.393001	0.9718	180.145	494108	711526	146067	0.694434	3.38274
399.542	204807	286655	163585	0.714474	1.252	290.816	318346	351121	120554	0.906656	2.64069	254.415	776276	591970	144609	1.31134	5.36812	397.254	114361	346911	190373	0.329655	0.600721	289.024	154186	391898	157825	0.393435	0.976944	181.23	493870	711952	145931	0.693684	3.38427
401.918	205705	287614	164151	0.715211	1.25314	292.544	318875	351101	120371	0.908214	2.64909	255.927	774950	589626	143323	1.31431	5.40702	399.63	114926	347972	190419	0.330275	0.603544	290.752	153618	392790	158501	0.391093	0.969188	182.34	494438	710766	145788	0.695641	3.39148
404.272	205138	286971	163239	0.71484	1.25667	294.248	318614	351428	119848	0.906627	2.65848	257.439	773673	590079	143077	1.31114	5.40738	401.973	114640	348727	190956	0.328738	0.600347	292.488	153724	392340	158631	0.391813	0.969063	183.44	493052	710624	146030	0.69383	3.37638
406.648	206122	287156	163646	0.717803	1.25956	295.984	319249	349914	119700	0.912364	2.66706	258.951	774367	587950	142966	1.31706	5.41645	404.349	115125	348247	191281	0.330585	0.601866	294.192	153508	393009	158154	0.390596	0.970622	184.52	492930	711160	145660	0.693135	3.38411
409.024	205153	286827	163898	0.715248	1.25171	297.72	319101	350871	119801	0.909454	2.66359	260.47	773106	588543	141375	1.31359	5.46848	406.769	114921	349067	191871	0.329223	0.598949	295.92	153900	394460	158628	0.390154	0.970197	185.6	494588	710744	146184	0.695874	3.38332
411.411	205505	286729	163386	0.71672	1.25778	299.48	319815	350040	119381	0.913653	2.67894	261.989	773814	586931	141777	1.31841	5.45795	409.112	114910	349103	191920	0.329158	0.598739	297.656	154439	393972	158236	0.392004	0.976001	186.68	492650	710936	146343	0.69296	3.3664
413.787	206109	287223	163110	0.717593	1.26362	301.184	318490	349118	119356	0.912272	2.66841	263.501	771431	587713	141611	1.3126	5.44754	411.488	115296	349454	191573	0.329933	0.601841	299.416	154572	392504	158262	0.393812	0.976684	187.76	494734	712166	146533	0.694689	3.37625
416.174	206120	287311	162929	0.717411	1.26509	302.888	318739	350036	118930	0.910588	2.68006	264.992	773656	586033	141017	1.32016	5.48624	413.787	115142	349722	192848	0.329238	0.597059	301.112	153555	391946	157540	0.391776	0.974705	188.825	493708	712134	145710	0.69328	3.38828
418.638	205788	287259	162918	0.716385	1.26314	304.624	318725	349294	119104	0.912484	2.67601	266.504	771861	586120	141245	1.3169	5.46471	416.174	115532	350033	192632	0.33006	0.599755	302.88	153844	392912	158155	0.391547	0.97274	189.905	494394	712080	145678	0.694296	3.39374
420.981	205332	286256	162317	0.7173	1.265	306.36	319501	349742	118622	0.913533	2.69343	268.023	771477	585047	140939	1.31866	5.47384	418.55	115185	350825	192594	0.328327	0.598075	304.576	153319	391725	157835	0.391394	0.971386	190.99	494236	712432	145631	0.693731	3.39376
423.357	206240	287553	161948	0.717225	1.27349	308.088	319440	349780	118788	0.91326	2.68917	269.563	772381	584647	139403	1.32111	5.54065	420.893	115254	350369	193179	0.328949	0.596615	306.304	153710	392724	157176	0.391395	0.977947	192.075	493618	713744	146257	0.69159	3.37501
425.755	206660	287215	161681	0.71953	1.2782	309.824	320019	349689	118332	0.915153	2.70442	271.047	770006	584584	139725	1.31719	5.51086	423.269	115664	351443	192823	0.329111	0.599844	308.032	153536	392155	157156	0.391519	0.976966	193.155	494910	713704	145212	0.693439	3.40819
428.131	206581	287615	161749	0.718254	1.27717	311.552	319864	348212	117534	0.918588	2.72145	272.573	769497	582841	139603	1.32025	5.51204	425.656	115532	351603	193322	0.328586	0.597614	309.76	153064	391756	157319	0.390712	0.972953	194.235	494862	714130	146257	0.692958	3.38352
430.507	206614	286763	160903	0.720504	1.28409	313.28	319445	348532	117753	0.916543	2.71284	274.085	770071	581669	138877	1.3239	5.54498	428.032	115809	352012	193368	0.328992	0.598905	311.496	153286	392216	156840	0.390821	0.977342	195.315	497202	714220	146203	0.696147	3.40077
432.894	207025	287047	161376	0.721224	1.28287	315.056	319180	348406	117606	0.916114	2.71398	275.576	769633	582727	138855	1.32074	5.54272	430.43	115605	352308	194184	0.328135	0.595336	313.224	152834	390399	156265	0.391481	0.978042	196.4	497374	715326	146123	0.695311	3.40379
435.314	206862	286884	161465	0.721065	1.28115	316.824	319249	348718	116746	0.915494	2.73456	277.088	770603	580114	138226	1.32836	5.57494	432.806	115987	353331	194420	0.328268	0.596581	314.952	151700	391245	157088	0.387737	0.965704	197.465	497398	716540	145927	0.694166	3.40854
437.712	207292	287152	161635	0.721889	1.28247	318.52	319695	348721	116882	0.916764	2.7352	278.6	768066	579631	137598	1.32509	5.58194	435.16	115684	353013	194230	0.327704	0.595601	316.648	152959	391460	157018	0.390739	0.974151	198.545	495582	714416	145988	0.693688	3.39467
440.088	207360	286929	161701	0.722687	1.28237	320.256	319196	347342	116674	0.918967	2.73579	280.119	766693	578983	137224	1.32421	5.58717	437.536	116065	353994	194282	0.327874	0.597408	318.384	152572	392681	157060	0.38854	0.971428	199.63	496366	716212	145996	0.693043	3.39986
442.475	206986	286996	161735	0.721216	1.27978	321.984	318071	346506	116530	0.917938	2.72952	281.631	768890	578870	136801	1.32826	5.62051	439.912	115878	353947	194338	0.327388	0.596271	320.112	152816	391949	157281	0.389888	0.971611	200.735	498034	717510	146018	0.694114	3.41077
444.851	207622	286003	160966	0.725943	1.28985	323.688	319255	347719	115978	0.918141	2.75272	283.143	765659	577361	136925	1.32613	5.59183	442.299	115711	353495	194909	0.327334	0.593666	321.784	152469	390945	157026	0.390001	0.970976	201.795	497080	716470	146022	0.69379	3.40415
447.227	207832	286654	161054	0.725028	1.29045	325.424	319170	346776	115891	0.920392	2.75405	284.662	768120	577177	136778	1.33082	5.61583	444.675	115783	353915	194907	0.327148	0.59404	323.512	152245	390918	157182	0.389456	0.968587	202.875	495774	714904	145062	0.693483	3.41766
449.614	207628	287406	161062	0.72242	1.28912	327.16	318532	346979	115629	0.918017	2.75478	286.181	765721	575729	136378	1.33	5.61471	447.062	116295	354934	194605	0.327654	0.597596	325.184	152552	391150	156896	0.39001	0.972315	203.955	495410	714768	145957	0.693106	3.39421
451.957	207937	286667	160845	0.725361	1.29278	328.888	319484	346541	115047	0.921921	2.77699	287.693	764230	574641	136095	1.32992	5.61542	449.482	116584	355683	195585	0.327774	0.596078	326.912	152891	392794	157382	0.389241	0.971463	205.025	496052	715998	145145	0.692812	3.41763
454.333	207969	287205	160613	0.724113	1.29485	330.616	319561	345728	114672	0.924315	2.78674	289.184	764681	574857	135373	1.33021	5.64871	451.902	116086	355787	196002	0.32628	0.592272	328.64	152018	392726	157744	0.387083	0.963699	206.11	495588	713940	145575	0.694159	3.40434
456.72	208438	286519	160348	0.727484	1.29991	332.352	318974	346026	114478	0.92182	2.78634	290.696	765591	573176	134863	1.3357	5.67679	454.245	116233	356076	195896	0.326426	0.593338	330.376	152530	392231	157166	0.388878	0.970501	207.195	494588	713516	145433	0.69317	3.40079
459.151	208113	285876	160192	0.727982	1.29915	334.064	318585	345836	114351	0.921202	2.78602	292.215	764421	572286	134140	1.33573	5.6987	456.621	116343	356533	196549	0.326317	0.591927	332.104	152416	390932	156356	0.389879	0.974801	208.275	493722	713032	145309	0.692426	3.39774
461.483	207610	286779	159634	0.723937	1.30054	335.792	318448	344761	114394	0.923675	2.78378	293.727	760974	570541	134359	1.33378	5.66373	459.008	116321	355889	196191	0.326846	0.592897	333.832	151572	391996	156201	0.386668	0.970367	209.355	496106	712244	145964	0.696539	3.39882
463.87	208843	286720	159684	0.728386	1.30785	337.528	319851	344668	113024	0.927999	2.82994	295.239	761687	571349	133251	1.33314	5.7162	461.384	116444	356784	196401	0.32637	0.592887	335.528	152206	390060	156060	0.390212	0.975306	210.44	494416	712868	145197	0.693559	3.40514
466.246	208305	286547	159098	0.726947	1.30928	339.264	318586	344876	113047	0.92377	2.81818	296.758	760550	569414	133057	1.33567	5.71599	463.76	116475	356894	196655	0.326359	0.592285	337.264	151835	389558	155651	0.389763	0.975482	211.5	494328	710518	144350	0.695729	3.4245
468.622	209580	286602	159027	0.731258	1.31789	341	318816	344075	113109	0.926589	2.81866	298.277	761490	569074	133170	1.33812	5.71816	466.147	116597	357367	196849	0.326267	0.592318	338.992	151354	388409	155400	0.389676	0.973962	212.585	492708	711250	144412	0.692735	3.41183
471.009	209071	286256	159025	0.730362	1.31471	342.728	317475	343934	112661	0.92307	2.81797	299.789	759990	569081	132179	1.33547	5.74972	468.523	116414	357538	197658	0.325598	0.588964	340.72	151780	388275	155908	0.390909	0.973526	213.67	492128	708344	144182	0.694758	3.41324
473.352	209532	286356	159054	0.731717	1.31737	344.424	318662	342620	112273	0.930076	2.83827	301.308	760411	567464	132014	1.34002	5.76008	470.91	116425	358035	197327	0.325179	0.590012	342.456	150762	388660	155274	0.387903	0.970946	214.755	490940	708322	143549	0.693103	3.42002
475.728	208995	286847	158716	0.728595	1.31679	346.184	317659	342738	112287	0.926828	2.82899	302.82	759526	566149	132497	1.34157	5.73241	473.286	116557	357158	196953	0.326346	0.591803	344.184	151254	388029	155192	0.3898	0.97462	215.835	490638	706226	143904	0.694732	3.40948
478.104	209211	286907	159199	0.729193	1.31415	347.888	317861	342880	112106	0.927034	2.83536	304.311	758570	566390	131550	1.33931	5.76639	475.629	116679	358052	197585	0.325872	0.590527	345.92	150299	387160	154251	0.388208	0.974376	216.915	490146	706200	143801	0.694061	3.40849
480.491	209430	287065	158909	0.729557	1.31792	349.616	318120	342644	111848	0.928428	2.84422	305.83	757404	565251	130764	1.33994	5.79214	478.005	116744	358564	197971	0.325587	0.589701	347.648	150454	387825	154966	0.387942	0.970881	218	488984	705726	143370	0.692881	3.41064
482.867	208758	286984	159198	0.727422	1.31131	351.344	317499	342598	111688	0.92674	2.84273	307.349	756613	562759	130492	1.34447	5.79817	480.392	116996	358653	197882	0.326211	0.591244	349.32	150075	386838	154025	0.387954	0.974355	219.08	490088	706004	143852	0.694172	3.4069
485.221	209915	286538	159434	0.732588	1.31663	353.08	317272	341491	111706	0.929079	2.84024	308.868	755540	562026	130404	1.34432	5.79382	482.768	116802	358600	198160	0.325716	0.589432	351.048	149940	386495	153325	0.387948	0.977923	220.145	490236	706024	142605	0.694362	3.43771
487.641	209623	287807	159235	0.728344	1.31643	354.816	315851	341778	110995	0.924143	2.84564	310.352	755117	561840	130346	1.34401	5.79318	485.144	116246	359299	198235	0.323536	0.586406	352.776	149188	384062	153115	0.388446	0.974349	221.225	488996	705054	142360	0.693558	3.43492
489.973	209955	287224	159255	0.730983	1.31836	356.512	317375	340915	110850	0.930951	2.86309	311.871	754519	559846	129216	1.34773	5.83919	487.564	116532	359375	197913	0.324262	0.588804	354.504	149165	385076	153264	0.387365	0.973257	222.31	489696	704782	142819	0.694819	3.42878
492.349	210375	287740	158734	0.73113	1.32534	358.248	316515	340214	110747	0.930342	2.858	313.383	753769	558420	128995	1.34982	5.84339	489.907	116728	359111	198345	0.325048	0.588509	356.2	149396	383539	153069	0.389521	0.976008	223.39	490026	703182	142503	0.696869	3.4387
494.736	210029	287345	158698	0.730931	1.32345	359.976	316414	340571	110148	0.929068	2.87263	314.902	752840	557790	128508	1.34968	5.85831	492.294	116675	359733	197833	0.324339	0.589768	357.936	149181	382850	152975	0.38966	0.9752	224.47	487250	703402	142295	0.692705	3.42422
497.123	210041	287378	158713	0.730887	1.3234	361.704	316692	339312	110486	0.933336	2.86635	316.421	750756	555827	127929	1.3507	5.86855	494.67	117175	360195	198309	0.325309	0.590868	359.696	148772	384169	152489	0.387258	0.975629	225.555	486562	698934	141488	0.696149	3.43889
499.565	210597	287427	158509	0.732698	1.32861	363.432	315855	338211	110050	0.933899	2.87011	317.968	749369	555460	127583	1.3491	5.8736	497.024	116731	360152	198934	0.324116	0.586783	361.392	148232	382786	152248	0.387246	0.973628	226.635	485762	699804	140946	0.69414	3.44644
501.941	210638	286530	157856	0.735135	1.33437	365.168	316444	339504	109496	0.932077	2.89001	319.487	748590	554229	127699	1.35069	5.86216	499.4	117087	360462	199129	0.324826	0.587997	363.12	147750	381928	151688	0.386854	0.974042	227.68	483734	698416	141385	0.692616	3.42139
504.328	210904	287045	158358	0.73474	1.33181	366.896	316768	338692	109051	0.935266	2.90477	320.999	745863	551683	127090	1.35198	5.86878	501.787	116680	360235	199058	0.3239	0.58616	364.856	148031	381850	151771	0.387669	0.975358	228.745	484190	699170	141291	0.692521	3.42691
506.726	210771	287494	158069	0.733132	1.33341	368.64	314490	337859	109473	0.930833	2.87276	322.518	745480	552210	125437	1.34999	5.94307	504.174	116985	361002	199534	0.324055	0.58629	366.592	147724	380555	151128	0.38818	0.977478	229.845	484222	698824	140394	0.69291	3.44901
509.069	210753	286649	157635	0.735229	1.33696	370.368	315315	337450	109183	0.934405	2.88796	324.037	744239	550107	125802	1.3529	5.91594	506.55	116675	361836	199385	0.322454	0.585178	368.256	147389	380018	150689	0.387847	0.978101	230.905	482768	696352	140685	0.693282	3.43155
511.445	211042	287616	158225	0.733762	1.3338	372.064	315830	337390	108690	0.936098	2.90578	325.549	745307	549276	125162	1.35689	5.95472	508.893	117009	361429	199668	0.32374	0.586018	369.992	147709	379099	151144	0.389631	0.977273	231.95	483856	697272	140869	0.693927	3.43478
513.832	210605	287134	157857	0.733472	1.33415	373.8	315025	336328	108970	0.936661	2.89094	327.061	744880	548643	124892	1.35768	5.96421	511.225	116776	361469	199606	0.32306	0.585033	371.696	147446	379135	150628	0.388902	0.97888	233.05	484068	697548	141004	0.693957	3.433
516.219	211072	287370	156931	0.734495	1.345	375.528	315531	336858	107517	0.936691	2.93471	328.573	743573	547837	125193	1.35729	5.93943	513.568	116568	361549	200229	0.322413	0.582174	373.424	147854	378438	150129	0.390695	0.984846	234.115	484576	696628	140784	0.695602	3.44198
518.595	210932	286545	157506	0.73612	1.3392	377.256	315474	336544	108016	0.937393	2.92063	330.064	743740	547829	124522	1.35761	5.97275	515.955	116875	361561	200883	0.323252	0.581809	375.152	147370	379351	150298	0.388479	0.980522	235.185	484762	696730	141274	0.695767	3.43137
520.971	211205	287230	156940	0.735315	1.34577	378.992	315010	335598	107506	0.938654	2.93015	331.576	742733	546999	124033	1.35783	5.98819	518.342	116809	361855	199833	0.322806	0.584534	376.816	146825	377915	150302	0.388513	0.976863	236.265	483194	696762	141032	0.693485	3.42613
523.358	211061	286822	156764	0.735861	1.34636	380.72	314796	335354	107200	0.938699	2.93653	333.095	740404	544471	123305	1.35986	6.00464	520.718	117040	361888	200175	0.323415	0.584687	378.544	146938	377539	148938	0.389198	0.986572	237.35	483028	695414	140560	0.694591	3.43644
525.734	211517	286629	157110	0.737948	1.3463	382.448	314439	335174	107212	0.938137	2.93286	334.607	738464	542890	122835	1.36025	6.01184	523.094	116883	362025	200693	0.322859	0.582396	380.272	146128	377085	149420	0.387519	0.977965	238.45	482216	694588	141048	0.694248	3.4188
528.11	211728	286837	156576	0.738147	1.35224	384.184	313875	335180	106250	0.936437	2.95412	336.119	737934	541209	122120	1.36349	6.04272	525.481	117086	361774	200629	0.323645	0.583596	382.008	146800	376362	148421	0.390049	0.989077	239.515	481292	693896	139924	0.693608	3.43966
530.453	211177	287059	157017	0.735658	1.34493	385.912	313986	333516	106540	0.941442	2.94713	337.631	737236	541393	122537	1.36174	6.01643	527.813	117161	362605	200845	0.323109	0.583341	383.744	146252	375826	148708	0.389149	0.983491	240.595	482566	694124	140484	0.695216	3.43502
532.829	211914	286250	156585	0.74031	1.35335	387.648	314039	332364	106313	0.944865	2.95392	339.15	735986	539641	121361	1.36384	6.06443	530.112	116576	362976	200824	0.321168	0.580491	385.48	145888	375104	148295	0.388926	0.983765	241.68	482304	692634	139346	0.696333	3.46119
535.216	211624	286536	155797	0.738558	1.35833	389.376	313462	332991	105875	0.941354	2.96068	340.662	733934	539679	121167	1.35995	6.05719	532.488	116603	361837	201171	0.322252	0.57962	387.184	145619	373961	148386	0.389395	0.981349	242.76	481398	692512	140238	0.695148	3.43272
537.592	212335	286786	155347	0.740393	1.36684	391.104	313529	332259	104915	0.943628	2.98839	342.181	735956	537729	121798	1.36864	6.04245	534.798	116784	363104	200912	0.321626	0.581268	388.912	145965	373065	147196	0.391259	0.991635	243.84	481426	693452	139554	0.694246	3.44975
539.979	212577	286715	155237	0.741422	1.36937	392.808	313085	331612	105169	0.944129	2.97697	343.693	734474	536017	120831	1.37024	6.07855	537.152	116971	362675	201684	0.322522	0.579972	390.68	144771	373799	147401	0.387297	0.982158	244.92	481068	692840	139774	0.694342	3.44175
542.366	212367	286227	155432	0.741953	1.36631	394.544	312985	331998	105072	0.942733	2.97875	345.205	733790	534657	120598	1.37245	6.08458	539.451	116944	363045	201510	0.322118	0.580337	392.368	144972	371908	147098	0.389808	0.985554	245.985	479190	691610	138970	0.692862	3.44815
544.742	212270	285822	155306	0.742665	1.36678	396.272	312188	331934	104455	0.940511	2.98872	346.717	730637	535829	119472	1.36357	6.11554	541.827	116952	362999	201202	0.322182	0.581266	394.136	144774	372745	147324	0.388399	0.982691	247.035	478082	690198	139622	0.692674	3.42411
547.118	212745	286018	155911	0.743818	1.36453	398	312524	330810	104536	0.944723	2.98961	348.229	732321	533013	119256	1.37393	6.14074	544.214	116904	364066	201361	0.321105	0.580568	395.84	145010	371178	146401	0.390676	0.990497	248.115	477940	689256	139237	0.693414	3.43256
549.494	212144	286049	155051	0.741634	1.36822	399.728	312641	331142	104335	0.944129	2.99652	349.741	729691	532376	119402	1.37063	6.11122	546.59	116806	362788	201905	0.321968	0.578523	397.504	144600	370580	145874	0.390199	0.991268	249.195	478500	688512	138354	0.694977	3.45853
551.87	212563	286765	154731	0.741245	1.37376	401.456	312246	330448	104111	0.944919	2.99916	351.253	728799	532480	119009	1.36869	6.12392	548.933	116712	362888	202259	0.321619	0.577041	399.232	143969	371300	146295	0.387742	0.984099	250.28	478312	689040	139312	0.694172	3.43339
554.213	212484	285598	154664	0.743995	1.37384	403.192	311980	330178	103300	0.944886	3.02014	352.765	726381	529474	118189	1.37189	6.14593	551.309	116744	363242	201876	0.321394	0.578293	400.968	144152	369771	145579	0.389842	0.990203	251.36	477398	688584	138537	0.693304	3.44599
556.6	212240	285696	154307	0.742887	1.37544	404.92	312105	329649	102868	0.94678	3.03405	354.277	724903	528570	118042	1.37144	6.14107	553.608	116735	363248	201863	0.321366	0.578291	402.696	143544	368911	145562	0.389101	0.986131	252.425	477522	689532	138807	0.692531	3.44019
558.976	213600	285560	154013	0.748004	1.3869	406.656	311862	328376	102545	0.949711	3.04124	355.845	724523	526504	117628	1.3761	6.15943	555.907	116836	363684	202205	0.321258	0.57781	404.392	143522	369118	145239	0.388826	0.988183	253.505	477024	688516	137841	0.692829	3.46068
561.352	213460	285847	154151	0.746762	1.38475	408.36	311762	328654	102758	0.948605	3.03394	357.336	722583	525899	117173	1.374	6.16679	558.283	116998	363853	202273	0.321554	0.578418	406.128	142838	367998	145098	0.388148	0.984424	254.59	477380	687454	138316	0.694417	3.45136
563.739	212877	286239	154713	0.743704	1.37595	410.096	311561	327581	102093	0.951096	3.05173	358.848	721353	525409	116907	1.37294	6.17031	560.659	116757	364068	202324	0.320702	0.577082	407.856	142866	367516	144982	0.388735	0.985403	255.67	477692	687030	137894	0.6953	3.4642
566.115	212923	285938	153960	0.744646	1.38297	411.824	311632	327296	102525	0.952142	3.03956	360.36	721140	524719	115935	1.37434	6.22019	563.013	116815	365252	202142	0.319819	0.577884	409.584	142846	366772	143798	0.389468	0.993385	256.755	477372	686200	137833	0.695675	3.4634
568.491	213523	285690	153428	0.747393	1.39168	413.56	310549	326744	101451	0.950435	3.06108	361.879	719050	521963	115445	1.37759	6.2285	565.411	116240	363813	202011	0.319505	0.575414	411.312	142166	365980	143594	0.388454	0.990059	257.835	475188	684548	138073	0.694163	3.44157
570.867	213765	285909	153674	0.747666	1.39103	415.288	309941	325530	101474	0.952113	3.05438	363.391	717186	520853	114779	1.37694	6.24843	567.787	117068	364025	202419	0.321594	0.578346	412.984	142488	365030	143964	0.390345	0.989746	258.915	476038	685166	137343	0.694778	3.46604
573.243	213318	285003	153191	0.748478	1.3925	417.016	310108	324576	101037	0.955423	3.06925	364.903	715481	517653	114552	1.38216	6.2459	570.163	116398	364235	202948	0.319569	0.573536	414.712	142228	363760	143614	0.390993	0.990347	259.995	476684	686484	137627	0.694385	3.4636
575.619	212842	285370	152703	0.745845	1.39383	418.752	309955	325360	100779	0.952652	3.07559	366.422	716669	517437	114387	1.38504	6.26531	572.583	116300	363705	202457	0.319765	0.574442	416.44	141616	364318	142564	0.388717	0.993354	261.08	475880	687022	137296	0.692671	3.46608
577.995	213998	285242	152260	0.750234	1.40548	420.48	309989	324944	100409	0.953977	3.08725	367.934	714554	515566	113585	1.38596	6.29094	574.915	116558	363487	202253	0.320666	0.5763	418.176	141494	362914	142616	0.389883	0.992129	262.145	475358	686474	137773	0.692463	3.45029
580.393	212950	285459	152376	0.745991	1.39753	422.184	310192	324209	99820.4	0.956768	3.10751	369.453	711920	515074	113310	1.38217	6.28292	577.291	117095	364791	202310	0.320991	0.578788	419.824	141015	363296	141940	0.388154	0.993483	263.19	476006	684370	137933	0.695539	3.451
582.736	213682	284994	152202	0.749778	1.40394	423.92	309270	324148	100012	0.954103	3.09234	370.965	711524	514620	112685	1.38262	6.3143	579.645	116412	364156	202184	0.319675	0.575773	421.56	140542	362770	142492	0.387415	0.986315	264.275	475146	685180	136657	0.693462	3.47693
585.112	213865	285015	152091	0.750367	1.40617	425.648	308474	323148	99619.4	0.954591	3.09652	372.533	710997	513933	112549	1.38344	6.31724	582.043	116660	364399	202433	0.320143	0.57629	423.312	140991	361820	141330	0.389672	0.997603	265.36	475780	684692	137893	0.694882	3.45035
587.499	214115	285198	152140	0.75076	1.40736	427.376	309139	322566	99477.1	0.958373	3.10764	374.031	711226	512993	111933	1.38642	6.35405	584.419	116401	364423	202365	0.319412	0.575201	425.016	140451	360422	141751	0.389685	0.990829	266.425	476122	684956	137750	0.695113	3.45642
589.875	213616	284736	151927	0.750225	1.40604	429.112	308410	321611	99639.1	0.958953	3.09527	375.543	710259	512803	111955	1.38505	6.34414	586.718	116311	364305	202150	0.319268	0.575369	426.744	140299	359695	141385	0.390049	0.992317	267.505	475630	686896	137020	0.692434	3.47125
592.251	214078	284771	151734	0.751756	1.41088	430.912	307112	321264	98809.4	0.955951	3.10813	377.062	709456	510776	111955	1.38898	6.33696	589.094	116038	364685	202470	0.318187	0.573113	428.48	139854	358952	140909	0.389616	0.992513	268.59	476240	684234	138460	0.696019	3.43955
594.638	214287	285106	151708	0.751605	1.4125	432.616	306934	320539	98725.6	0.957556	3.10896	378.581	709331	510560	110854	1.38932	6.39876	591.47	116451	364862	203034	0.319164	0.573555	430.144	139778	358170	140442	0.390255	0.995265	269.67	475078	684328	137197	0.694226	3.46275
597.014	214264	285093	150755	0.751558	1.42127	434.352	307340	320745	97875.6	0.958207	3.14011	380.093	706203	509409	110861	1.38632	6.37016	593.846	116081	364999	202762	0.318031	0.572499	431.88	139078	358489	140150	0.387955	0.992347	270.715	474046	682360	137512	0.694715	3.44732
599.357	214355	285161	151083	0.7517	1.4188	436.08	306404	319660	97742.1	0.95853	3.13482	381.584	706243	507606	110798	1.39132	6.37415	596.178	116589	365281	203225	0.319177	0.573693	433.576	138841	357759	140429	0.388086	0.988695	271.795	475230	682976	137282	0.695822	3.4617
601.733	213971	285066	150065	0.7506	1.42586	437.808	305691	318728	97088.8	0.959099	3.14858	383.096	704973	507243	110383	1.38981	6.38659	598.477	116460	365398	202495	0.318721	0.575127	435.304	138888	356979	139716	0.389064	0.994068	272.88	473808	682556	137444	0.694167	3.44728
604.12	213250	284518	151046	0.749513	1.41182	439.544	305938	319334	97017.6	0.958049	3.15342	384.615	704854	506051	109564	1.39285	6.43327	600.875	116515	365085	202880	0.319143	0.574303	437.04	137945	356931	139689	0.386475	0.987517	273.96	474582	681514	136497	0.696364	3.47687
606.496	213852	284757	150970	0.750997	1.41652	441.28	305551	318471	96881.7	0.959431	3.15386	386.134	703029	503943	109012	1.39506	6.44909	603.229	116482	365035	202372	0.319098	0.575583	438.704	138741	354510	138766	0.391361	0.99982	275.04	473550	680946	136440	0.69543	3.47077
608.872	213930	284358	151201	0.752326	1.41487	443.008	304930	317171	96877.5	0.961405	3.14758	387.653	698644	501829	108744	1.3922	6.42469	605.616	116329	365341	202717	0.318412	0.573849	440.44	137750	353299	138579	0.389897	0.99402	276.12	472304	680728	135894	0.693822	3.47552
611.259	214532	284125	150635	0.755063	1.42419	444.736	305344	317249	96721.4	0.962474	3.15694	389.165	699570	500260	108271	1.39841	6.46127	607.992	116658	364721	203209	0.319856	0.57408	442.176	137168	353540	138105	0.387983	0.993212	277.185	472316	680164	136106	0.694415	3.47021
613.635	214465	283222	149751	0.757235	1.43215	446.432	304609	316439	95790.1	0.962615	3.17996	390.677	696350	499054	107907	1.39534	6.45323	610.368	116622	365715	203054	0.318887	0.57434	443.904	137431	352911	137358	0.389422	1.00054	278.225	472712	680994	136152	0.69415	3.47194
616.011	214482	284437	149650	0.754057	1.43322	448.168	304565	315872	95552	0.964202	3.18743	392.224	696993	497996	107862	1.3996	6.46191	612.744	116506	365480	203401	0.318776	0.572792	445.568	136381	350715	137081	0.388866	0.994894	279.315	471684	679962	136739	0.693692	3.44952
618.398	214728	283456	149282	0.757535	1.43841	449.896	304048	315294	95849.2	0.964331	3.17214	393.743	694391	496280	107200	1.39919	6.47756	615.175	116319	365417	203512	0.318319	0.571559	447.272	136074	350909	137518	0.387775	0.989501	280.395	473788	681666	136785	0.695044	3.46375
620.774	214520	283343	149889	0.757104	1.43119	451.632	303351	314102	95099.9	0.965772	3.18982	395.262	692944	494300	106477	1.40187	6.50793	617.507	116668	365399	202690	0.31929	0.575599	449	135676	350212	137079	0.387411	0.989769	281.48	474080	682196	137329	0.694932	3.45214
623.15	214615	284260	149364	0.754997	1.43687	453.36	303845	314680	95362.1	0.965568	3.18622	396.76	690846	493323	106102	1.40039	6.51112	619.883	116513	364976	202926	0.319234	0.574163	450.736	135452	349171	136278	0.387926	0.993946	282.56	472476	681672	136712	0.693113	3.456
625.526	214120	283289	149431	0.755836	1.4329	455.096	302821	313511	94145.9	0.965902	3.21651	398.272	689620	491726	105657	1.40245	6.52695	622.27	116116	365619	203040	0.317588	0.571889	452.464	135069	347930	136019	0.388207	0.993016	283.625	473506	680392	136499	0.695931	3.46892
627.869	214353	283802	149416	0.75529	1.4346	456.8	303109	312855	94155.6	0.968847	3.21923	399.784	689361	490177	105390	1.40635	6.54103	624.646	115944	365840	203527	0.316924	0.569671	454.2	134656	347316	135858	0.387705	0.991158	284.665	472642	681548	136620	0.693483	3.45954
630.256	214718	283544	149836	0.757267	1.43302	458.56	302312	312404	94183.1	0.967698	3.20984	401.303	688199	490026	104430	1.40441	6.59006	626.989	116010	365640	203264	0.317279	0.570737	455.928	134735	346302	135152	0.389067	0.996911	285.75	471888	681120	136546	0.692812	3.45589
632.632	215204	282769	148565	0.761058	1.44855	460.272	301910	312346	93784.4	0.966588	3.21919	402.815	686029	487541	104356	1.40712	6.57391	629.365	116348	365295	203260	0.318505	0.572411	457.6	133768	346122	135280	0.386474	0.988819	286.835	472528	680774	135910	0.694104	3.47677
635.019	214652	283235	148443	0.757856	1.44602	462	301766	310886	93558.2	0.970665	3.22544	404.334	684740	486436	103932	1.40767	6.58836	631.741	115933	365576	203484	0.317123	0.56974	459.328	133266	344338	134355	0.387022	0.991896	287.915	472258	681138	135107	0.693337	3.49543
637.395	215536	283336	148598	0.760708	1.45046	463.736	301402	310559	93117.4	0.970517	3.2368	405.853	681131	485651	103389	1.40251	6.58802	634.128	116000	365810	203444	0.317105	0.570182	461.032	133075	343265	133959	0.387674	0.993403	289	471990	680776	136694	0.693312	3.45289
639.782	214862	283400	147885	0.758157	1.4529	465.464	300712	309656	93293.9	0.971117	3.22328	407.365	679631	482956	102653	1.40723	6.62069	636.515	115849	365377	203660	0.317067	0.568836	462.768	132562	343259	134155	0.386188	0.988129	290.08	471142	678836	135483	0.694044	3.47749
642.125	215150	283095	147905	0.759993	1.45465	467.2	300370	309239	93194.2	0.971321	3.22305	408.856	678407	481886	102524	1.40782	6.61705	638.891	115932	366022	203531	0.316735	0.569603	464.496	131459	337339	131648	0.389694	0.998566	291.145	472140	680816	135703	0.693491	3.47921
644.512	215325	282886	147155	0.76117	1.46325	468.928	299810	308595	92838.2	0.971532	3.22938	410.368	677064	480274	101572	1.40975	6.66584	641.278	115488	364681	203584	0.316683	0.567276	466.224	131689	336759	130298	0.391048	1.01068	292.23	472638	681160	136344	0.693872	3.4665
646.888	215229	283045	147460	0.760407	1.45958	470.656	299869	308864	92407.7	0.970877	3.24506	411.887	674486	479074	101698	1.40789	6.63225	643.654	115576	364830	203402	0.316795	0.568217	467.952	130434	334908	130108	0.389462	1.00251	293.31	472094	679108	136127	0.695168	3.46804
649.264	215328	282663	146924	0.761785	1.46558	472.36	299629	307425	92194.5	0.97464	3.24996	413.406	673209	477499	100757	1.40987	6.68154	645.986	115705	365475	203548	0.316586	0.568438	469.688	129801	332764	129776	0.39007	1.00019	294.39	472008	677940	135429	0.696239	3.48529
651.651	215435	283299	146559	0.760449	1.46995	474.088	298749	307184	92162	0.972541	3.24156	414.918	672509	474596	100487	1.41701	6.69249	648.362	115657	365395	204430	0.316527	0.565755	471.416	129304	331181	128834	0.390432	1.00365	295.49	472122	678856	135013	0.695467	3.49686
654.038	215290	282375	146646	0.762425	1.46809	475.816	298661	307460	91844.8	0.971382	3.25181	416.437	671357	473150	99747.3	1.41891	6.73058	650.749	115905	364716	203988	0.317794	0.568192	473.152	129385	330564	128824	0.391407	1.00436	296.555	472172	678512	135351	0.695893	3.48849
656.414	215811	282248	146038	0.764614	1.47777	477.552	299046	306915	91275.1	0.974362	3.27632	417.956	668877	472039	99757	1.417	6.70506	653.136	115946	365852	204018	0.316922	0.568314	474.888	128741	329530	128374	0.390681	1.00286	297.635	470916	677062	135123	0.695529	3.48509
658.757	215373	282235	146675	0.763096	1.46836	479.28	299411	305762	91156.4	0.979228	3.28459	419.44	667586	470917	99019	1.41763	6.742	655.523	115516	365362	203093	0.31617	0.568786	476.584	128385	328554	127370	0.390758	1.00797	298.715	470598	676252	134924	0.695891	3.48787
661.144	215733	281414	146462	0.766604	1.47296	481.016	298518	305220	90962	0.97804	3.28178	420.952	664697	469063	98800.4	1.41707	6.72767	657.91	115889	365756	203318	0.316848	0.569989	478.312	128409	328210	127000	0.39124	1.01109	299.795	467936	674000	134735	0.694267	3.47302
663.52	215831	281922	145753	0.76557	1.4808	482.752	297486	305212	90718.4	0.974686	3.27923	422.464	662966	468049	97692.4	1.41645	6.78625	660.286	116265	364923	203982	0.3186	0.569975	479.984	127879	326931	126844	0.391149	1.00816	300.865	467326	673584	134337	0.69379	3.47875
665.907	215104	282395	145452	0.761711	1.47887	484.48	297805	304221	90540.8	0.978909	3.28918	423.976	660497	466649	97267.7	1.41541	6.79051	662.662	115575	365611	203933	0.316114	0.566729	481.712	127092	326375	125494	0.389406	1.01274	301.95	467276	671788	134379	0.695571	3.47731
668.283	215424	282644	145534	0.762174	1.48023	486.184	297210	304826	89989.2	0.975014	3.30273	425.495	660453	464379	97251.3	1.42223	6.7912	665.005	115916	365295	204261	0.317322	0.567492	483.448	126758	324062	125262	0.391151	1.01193	303.035	465636	669648	133248	0.695344	3.4945
670.659	215692	281990	145674	0.764892	1.48065	487.912	296944	304050	89696.5	0.976628	3.31054	427.007	659786	464497	97158.3	1.42043	6.79083	667.381	115220	366105	203452	0.314718	0.566326	485.184	126486	323608	125339	0.390863	1.00916	304.115	465302	670398	132207	0.694068	3.5195
673.046	216275	281760	144963	0.767584	1.49193	489.648	296136	302335	89200.4	0.979497	3.3199	428.526	659340	463136	97012.7	1.42364	6.79643	669.768	115755	365084	203705	0.317066	0.568252	486.912	125651	322906	124577	0.389126	1.00862	305.195	464754	667420	133417	0.696344	3.48347
675.411	215863	281551	145247	0.766692	1.48617	491.376	296108	302019	89477.2	0.980428	3.3093	430.038	658974	462070	96149	1.42614	6.85368	672.144	115415	365051	203489	0.31616	0.567178	488.64	125824	322180	124369	0.390539	1.0117	306.275	463708	666734	133104	0.695492	3.4838
677.798	215644	280884	144433	0.767733	1.49304	493.12	295895	301851	89118.4	0.980268	3.32025	431.557	656369	461323	95753.4	1.4228	6.85478	674.52	115465	365239	203646	0.316134	0.566986	490.368	125900	320734	123755	0.392537	1.01734	307.355	463890	666306	132970	0.696212	3.48869
680.141	215571	280908	144142	0.767407	1.49555	494.848	295261	300808	88433.8	0.981562	3.33878	433.048	656150	458876	94881.7	1.42991	6.91545	676.896	115465	365334	204027	0.316055	0.565931	492.072	125191	320524	123467	0.390583	1.01397	308.435	463458	665450	132504	0.696458	3.4977
682.517	215472	281342	144132	0.765872	1.49496	496.544	294972	300536	88875.6	0.981487	3.31894	434.56	655301	457914	95021	1.43106	6.89639	679.294	115372	365794	203197	0.315401	0.567782	493.816	125141	318644	123114	0.392731	1.01647	309.52	461652	661640	131905	0.697739	3.49989
684.904	215948	281622	143651	0.766802	1.50328	498.28	293700	300426	88613.8	0.977611	3.31438	436.072	653597	457467	93947.3	1.42873	6.95706	681.67	115379	365014	203898	0.316095	0.565866	495.544	124496	318511	123398	0.39087	1.0089	310.58	461890	663036	131952	0.696629	3.50043
687.28	216138	281235	143411	0.768534	1.50713	500.016	294570	299356	87655	0.984012	3.36056	437.591	651951	456384	93845.6	1.42851	6.94707	684.046	115286	364952	203078	0.315895	0.567694	497.216	124260	317602	122633	0.391244	1.01326	311.665	461632	664556	132057	0.694647	3.49571
689.656	215856	281726	143528	0.766192	1.50393	501.744	293420	299672	87656.6	0.979136	3.34738	439.11	650430	453859	93188	1.43311	6.97976	686.389	115589	365320	203731	0.316405	0.567362	498.944	124558	316512	122610	0.393534	1.01589	312.765	462366	663070	132014	0.697311	3.50241
692.043	216091	281358	143809	0.768028	1.50262	503.472	293805	298311	87591.2	0.984894	3.35427	440.629	649040	451809	92842.1	1.43654	6.99079	688.765	114937	364916	203745	0.314969	0.564124	500.68	124083	316812	122053	0.391661	1.01663	313.835	460814	662370	132959	0.695705	3.46584
694.43	216465	281433	144274	0.769155	1.50038	505.2	293530	298001	87632.2	0.984996	3.34957	442.197	645740	450920	93285.9	1.43205	6.92216	691.141	115198	365347	203710	0.315311	0.565501	502.376	123670	315122	122073	0.392451	1.01308	314.915	461404	662700	131179	0.696249	3.51735
696.806	215962	281626	143753	0.766838	1.50231	506.928	292070	297412	86886	0.982037	3.36153	443.709	645387	450707	92116.4	1.43194	7.00621	693.517	115377	365276	204315	0.315863	0.564702	504.104	123116	313894	120606	0.392222	1.02081	315.995	461226	660678	131696	0.69811	3.5022
699.182	216727	280196	143475	0.773484	1.51056	508.664	291994	296638	87032.7	0.984345	3.35499	445.221	644114	447700	91660.9	1.43872	7.02715	695.904	115284	364492	203451	0.316286	0.566641	505.832	122878	313501	120432	0.391953	1.02031	317.075	460780	660144	130934	0.697999	3.51919
701.525	216185	281539	143279	0.767867	1.50884	510.4	291659	295880	86613.1	0.985733	3.36737	446.719	642646	447239	91337.3	1.43692	7.03596	698.28	115005	364119	203823	0.315843	0.564238	507.576	122116	313180	120727	0.389922	1.0115	318.155	458610	658298	130635	0.69666	3.51062
703.901	216337	281110	143277	0.769582	1.50992	512.128	291838	296301	85905.8	0.984935	3.39718	448.238	640357	445961	91146.4	1.4359	7.02559	700.678	115193	364784	203401	0.315784	0.566333	509.312	122141	311869	119819	0.391642	1.01938	319.24	458532	656114	130079	0.69886	3.52503
706.288	216635	280272	142965	0.772944	1.5153	513.856	290485	295359	85991.4	0.983499	3.37807	449.75	638610	442934	90014	1.44177	7.09456	703.032	114783	365026	202750	0.314451	0.566129	511.04	121376	311460	119710	0.389701	1.01392	320.305	458212	653648	128714	0.701007	3.55991
708.675	216178	280503	142945	0.770681	1.51231	515.584	290378	295040	85733.5	0.984197	3.38698	451.262	637867	441573	89928.9	1.44453	7.09302	705.331	115475	365180	203115	0.316213	0.568519	512.776	121341	310262	119762	0.391093	1.01319	321.395	456192	652696	129638	0.698935	3.51898
711.051	216434	280850	143233	0.770638	1.51106	517.28	289998	294519	85154.4	0.984649	3.40555	452.781	634964	439091	89299.7	1.44609	7.11049	707.707	115122	364779	203582	0.315593	0.565482	514.472	120969	310482	119397	0.389616	1.01317	322.475	456110	651036	128905	0.700591	3.53835
713.438	216216	280092	142741	0.771948	1.51475	519.016	289561	293858	85469.5	0.98538	3.38789	454.293	633700	438840	88968.4	1.44403	7.12275	710.083	114865	364100	203076	0.315475	0.565622	516.2	120337	309282	118876	0.389086	1.01229	323.555	455556	653392	128127	0.697217	3.55551
715.781	216529	280337	142598	0.772388	1.51846	520.752	289636	292728	85010.8	0.98944	3.40705	455.784	631526	437017	88495	1.44508	7.13629	712.47	114894	363871	202620	0.315754	0.56704	517.928	120473	308441	118566	0.390587	1.01608	324.635	455008	649770	128416	0.70026	3.54325
718.157	216594	279932	143142	0.773737	1.51314	522.48	289086	292605	84866.5	0.987974	3.40636	457.303	629951	436121	87911.9	1.44444	7.16572	714.813	114897	363331	203071	0.316233	0.565799	519.696	119967	307945	118152	0.389572	1.01536	325.72	454558	650498	128885	0.698785	3.52685
720.533	216270	279871	142335	0.772749	1.51945	524.208	288871	291902	84709.2	0.989616	3.41015	458.822	628734	434736	87296.7	1.44624	7.20227	717.101	114936	363335	202187	0.316338	0.568465	521.392	120111	307252	117766	0.39092	1.01991	326.8	454508	650014	128836	0.699228	3.52781
722.964	216422	279626	141884	0.773968	1.52535	525.936	286996	290911	84352.9	0.986542	3.40233	460.334	628446	431964	87347.1	1.45486	7.19481	719.477	114595	363948	202600	0.314868	0.565624	523.128	119288	305778	117896	0.390113	1.01181	327.865	453846	651082	128645	0.697064	3.52789
725.296	216495	280130	142318	0.772836	1.5212	527.672	287741	289960	84062.2	0.992348	3.42295	461.846	625306	431924	86662.9	1.44772	7.21538	721.864	114747	362649	202410	0.316414	0.566905	524.864	119262	304570	117360	0.391577	1.01621	328.945	454218	649346	128346	0.699501	3.53901
727.683	216966	279338	141489	0.776716	1.53345	529.408	286279	290029	84320.6	0.98707	3.39512	463.365	624483	430206	86520.3	1.45159	7.21776	724.24	114528	362335	202875	0.316084	0.564525	526.592	119069	304848	116871	0.390584	1.0188	330.035	453596	648586	127878	0.699361	3.54711
730.07	216647	279048	141017	0.776379	1.53632	531.136	286830	289668	83554.9	0.990204	3.43283	464.877	621933	428517	85902.6	1.45136	7.23998	726.539	114730	362649	201720	0.316366	0.568759	528.32	118184	303452	116915	0.389464	1.01085	331.1	453232	646600	127598	0.700946	3.55202
732.446	216783	279265	141167	0.77626	1.53564	532.832	285181	288801	83213.9	0.987465	3.42709	466.417	621657	426213	85078.7	1.45856	7.30685	728.893	114564	362311	202186	0.316203	0.566624	530.024	118556	303121	115860	0.391118	1.02327	332.185	453904	648486	127771	0.699944	3.55249
734.811	216872	278975	140790	0.777387	1.54039	534.568	286000	288025	82886.7	0.992969	3.45049	467.957	619016	425999	84947.1	1.45309	7.28707	731.269	114396	362742	202050	0.315366	0.566178	531.752	118266	302802	116376	0.39057	1.01624	333.265	451578	647612	127556	0.697297	3.54023
737.198	216560	279258	140870	0.775483	1.5373	536.304	285584	286746	83316.5	0.995946	3.4277	469.469	617073	423274	84429.6	1.45786	7.30873	733.568	114340	362978	202362	0.315005	0.565028	533.488	117285	301506	115610	0.388998	1.01449	334.35	450158	646950	126958	0.695816	3.54572
739.574	216770	279466	139903	0.775657	1.54943	538.04	285436	286560	82996.6	0.996078	3.43913	470.981	616694	421349	84447.6	1.46362	7.30269	735.867	114477	361890	202043	0.316332	0.566599	535.216	117307	300440	115644	0.39045	1.01438	335.435	450312	643384	127131	0.699912	3.54212
741.917	216706	278240	139759	0.778847	1.55057	539.768	284196	286115	82347	0.993294	3.4512	472.493	614556	420379	83554.7	1.46191	7.35513	738.243	113997	362184	201298	0.31475	0.56631	536.944	117443	299928	115069	0.391571	1.02063	336.515	450432	643472	126584	0.700002	3.55837
744.304	216762	278969	139442	0.77701	1.5545	541.504	283574	285859	82156.4	0.992007	3.45163	474.005	614383	418806	83324	1.46699	7.37342	740.619	114458	362268	201266	0.315949	0.56869	538.68	116625	298570	114750	0.390611	1.01634	337.6	450092	641280	126428	0.701865	3.56006
746.68	216678	278334	139333	0.778484	1.55511	543.232	283579	285568	81749	0.993036	3.4689	475.517	610646	416997	83001.1	1.46439	7.35708	743.006	113720	362378	201407	0.313816	0.564627	540.416	116542	297688	114914	0.391493	1.01417	338.66	449952	644786	127152	0.697832	3.5387
749.056	216619	278446	139331	0.777956	1.55471	544.928	283661	283825	81357.6	0.999423	3.4866	477.008	609640	416087	82617.3	1.46517	7.37909	745.47	114344	362429	201875	0.315492	0.566409	542.144	115894	297501	114368	0.389556	1.01334	339.745	450488	643480	126462	0.700081	3.56224
751.443	216452	277867	139212	0.778976	1.55484	546.696	283525	283920	81219.6	0.998609	3.49084	478.527	608106	414176	82181.9	1.46823	7.39951	747.813	114182	362146	201595	0.315292	0.566393	543.848	115700	297620	113969	0.388752	1.01519	340.825	450948	644862	126139	0.699294	3.57501
753.819	216797	277365	139346	0.78163	1.55582	548.392	282508	283454	80914.4	0.996662	3.49144	480.039	605999	412226	81317.4	1.47006	7.45226	750.189	113826	362231	202577	0.314237	0.561891	545.576	115656	295274	113281	0.391691	1.02097	341.905	449812	643390	126392	0.699128	3.55886
756.206	216741	277347	138789	0.781478	1.56166	550.136	282788	283422	80849.5	0.99776	3.4977	481.551	603013	410820	80500.7	1.46783	7.49078	752.565	113921	362266	201893	0.314467	0.564265	547.344	114994	295062	113296	0.389727	1.01499	342.985	449162	642926	126555	0.698622	3.54916
758.582	217320	277562	138889	0.782961	1.5647	551.864	282559	282410	80586.8	1.00053	3.50627	483.07	602246	408610	80322.4	1.47389	7.49785	754.941	113927	362035	202447	0.314686	0.56275	549.04	115251	294052	112663	0.39194	1.02297	344.085	448284	642434	126050	0.69779	3.5564
760.925	216365	277621	139059	0.779352	1.55592	553.6	281282	281508	80193.8	0.999201	3.50754	484.589	599740	407853	80115.1	1.47048	7.48598	757.328	113713	362601	202385	0.313603	0.561865	550.776	114636	293542	112328	0.390527	1.02055	345.15	447134	641468	126031	0.697048	3.54781
763.301	217030	277258	139055	0.782772	1.56075	555.296	281095	280399	80197.5	1.00248	3.50503	486.101	598917	405297	79209.4	1.47772	7.56118	759.616	113825	361825	201729	0.314587	0.564249	552.52	114345	291942	112098	0.39167	1.02004	346.23	447906	642332	127078	0.697312	3.52465
765.688	216465	277373	139159	0.780414	1.55553	557.032	280582	280659	79930.1	0.999728	3.51035	487.592	597003	404223	79337.7	1.47692	7.52483	762.047	113729	362038	202482	0.314136	0.561676	554.216	113811	292632	111119	0.388923	1.02423	347.315	448020	639564	125628	0.700508	3.56624
768.064	217201	277072	138467	0.783916	1.56861	558.76	279378	280239	79538.1	0.996927	3.5125	489.111	596056	402787	78717.4	1.47983	7.57209	764.379	113563	361065	202435	0.314522	0.560985	555.944	113560	291428	111180	0.389669	1.02141	348.395	447284	642750	126349	0.695891	3.54007
770.451	216635	276686	138808	0.782961	1.56068	560.512	279725	279289	78480	1.00156	3.56428	490.63	593867	400816	78501.1	1.48165	7.56508	766.766	113432	361663	201936	0.31364	0.561721	557.68	113075	290546	111156	0.389182	1.01726	349.48	447572	638876	125887	0.700562	3.55535
772.926	216465	276955	138224	0.781592	1.56605	562.216	280058	277834	79015.8	1.008	3.54433	492.149	591857	400324	77814	1.47844	7.60605	769.098	113753	361228	200941	0.314905	0.5661	559.408	113532	289320	110623	0.392411	1.0263	350.54	446864	638176	125090	0.700221	3.57235
775.302	217082	276590	138157	0.784851	1.57127	563.952	279174	277650	78413.5	1.00549	3.56028	493.661	591647	399121	77836.1	1.48237	7.60119	771.496	113434	360929	201355	0.314282	0.56335	561.144	113074	289692	110444	0.390324	1.02381	351.625	447044	638298	125091	0.700369	3.57374
777.645	217391	276376	137792	0.786576	1.57768	565.68	278366	276285	78576.9	1.00753	3.5426	495.173	589853	396766	77409.3	1.48665	7.61992	773.872	113292	360866	201897	0.313944	0.561136	562.872	112462	288759	110210	0.389467	1.02044	352.7	444902	636288	124706	0.699215	3.56762
780.021	216810	276825	137531	0.783201	1.57645	567.408	278175	276958	78144.9	1.0044	3.55973	496.657	585831	395333	76925.6	1.48187	7.61556	776.259	113479	361161	201309	0.314206	0.563706	564.6	112630	287884	110046	0.391235	1.02349	353.785	446508	635276	124806	0.702857	3.5776
782.397	217156	276016	137440	0.786752	1.58001	569.144	277235	275316	77557.1	1.00697	3.57459	498.169	585453	393211	76498.3	1.4889	7.65315	778.635	113268	360779	201188	0.313954	0.562996	566.272	112314	287574	109727	0.390557	1.02357	354.865	445132	636360	124626	0.699497	3.57174
784.784	216588	276150	137137	0.784314	1.57935	570.88	276608	275254	77674.2	1.00492	3.56112	499.688	581711	392591	75673.3	1.48172	7.68714	781.011	113213	360481	201679	0.31406	0.561351	567.976	111958	286626	108999	0.390607	1.02715	355.95	445606	635612	124896	0.701066	3.56782
787.16	216185	276019	137012	0.783226	1.57786	572.592	276595	274119	77456.5	1.00903	3.57097	501.2	581443	390407	75082.1	1.48932	7.74409	783.387	112985	360613	201218	0.313313	0.561503	569.712	112025	285206	108825	0.392787	1.0294	357.035	443866	633870	123817	0.700248	3.58486
789.547	216752	276172	137068	0.784844	1.58134	574.32	275720	273899	77185	1.00665	3.5722	502.712	579356	388787	74737.1	1.49016	7.75191	785.807	113246	360838	201823	0.313843	0.561118	571.44	111264	284504	108430	0.391081	1.02614	358.115	441328	630292	122931	0.700196	3.59005
791.934	217535	276094	137068	0.787905	1.58706	576.048	275086	273018	76638.9	1.00758	3.58938	504.238	577700	387964	74731.9	1.48905	7.7303	788.15	113004	360654	201367	0.31333	0.561182	573.176	110650	283966	107032	0.389657	1.0338	359.195	441782	628600	123111	0.702803	3.5885
794.266	216679	275468	136885	0.786585	1.58292	577.784	274182	273036	76359.6	1.0042	3.59067	505.75	575759	385569	74105.9	1.49327	7.76941	790.482	113266	359917	201835	0.314701	0.561184	574.904	110664	282331	107096	0.391966	1.03332	360.26	439666	627100	122616	0.70111	3.58571
796.653	217140	275779	137031	0.787369	1.58461	579.52	274715	271874	76185.5	1.01045	3.60587	507.269	574786	384283	73644.4	1.49574	7.80488	792.869	113063	360350	201325	0.313758	0.561594	576.64	110649	280056	106098	0.395095	1.04289	361.345	438946	626926	122828	0.700156	3.57367
799.04	216933	275331	136171	0.787898	1.59309	581.224	274125	272282	76045.1	1.00677	3.60477	508.753	571183	382279	72884.6	1.49415	7.83681	795.245	113245	360035	201288	0.314541	0.562604	578.376	109991	278218	105066	0.395344	1.04688	362.39	437832	625290	122838	0.700206	3.5643
801.416	216756	275291	135920	0.787372	1.59473	582.96	273625	270258	75490.2	1.01246	3.62464	510.272	570357	380220	72273.4	1.50007	7.89166	797.621	113147	359755	200669	0.314512	0.56385	580.072	109583	276411	104483	0.396448	1.04881	363.495	437364	625718	122556	0.698979	3.5687
803.803	217024	275738	136015	0.787064	1.59558	584.688	271715	269749	75191.6	1.00729	3.61363	511.784	567737	378706	72687.9	1.49915	7.81062	799.931	112689	359829	200505	0.313174	0.562025	581.808	109180	274782	103611	0.397332	1.05375	364.595	438196	624206	121969	0.702005	3.59269
806.179	216399	275066	135552	0.786716	1.59643	586.424	272328	268488	75135.4	1.0143	3.62449	513.296	566457	377854	71575.3	1.49914	7.91414	802.307	113419	359969	200845	0.31508	0.564708	583.472	107993	274194	103215	0.393856	1.04629	365.675	437644	625108	121897	0.700109	3.59027
808.555	217137	274879	136049	0.789937	1.59602	588.152	272500	267555	74873.6	1.01848	3.63947	514.815	565710	376149	71546.4	1.50395	7.90689	804.65	113197	359684	200265	0.314713	0.565239	585.144	108334	273094	102553	0.396691	1.05637	366.74	437180	622396	121493	0.702415	3.59838
810.942	217194	274755	135591	0.790501	1.60183	589.888	270934	267218	74910.2	1.01391	3.61678	516.327	563171	375450	71219.1	1.49999	7.90759	806.949	112945	359174	200398	0.314459	0.563605	586.856	107744	272579	102385	0.395278	1.05234	367.84	436156	621754	121482	0.701493	3.59028
813.406	216610	274755	134928	0.788374	1.60537	591.616	269929	266564	74362.9	1.01262	3.62989	517.874	562391	374323	70368.6	1.50242	7.99208	809.336	112593	359099	200503	0.313542	0.561552	588.592	108038	271960	102182	0.397256	1.05731	368.9	434950	621664	121567	0.699654	3.57787
815.782	217223	274334	134858	0.79182	1.61075	593.312	269948	266549	74311.4	1.01275	3.63265	519.358	559867	372584	70068.3	1.50266	7.99031	811.712	112611	359375	200092	0.313352	0.562796	590.32	107685	270476	101560	0.398131	1.06031	369.99	435802	621518	121686	0.70119	3.58137
818.114	217212	274280	134954	0.791935	1.60953	595.04	269814	266091	73934.2	1.01399	3.64937	520.877	558460	371014	69774.6	1.50523	8.00378	814.099	112313	358742	200155	0.313074	0.56113	591.992	107316	269558	100984	0.39812	1.0627	371.035	437280	622932	121877	0.701971	3.58787
820.501	217157	274345	134815	0.791547	1.61077	596.776	268202	264515	73255.5	1.01394	3.66119	522.382	555704	368546	69350.3	1.50783	8.01301	816.486	112274	357695	199761	0.313881	0.56204	593.728	106676	266996	99700.5	0.399541	1.06996	372.115	436640	623168	121698	0.700678	3.58789
822.888	216858	274344	134998	0.790462	1.60638	598.544	267704	263745	73348.8	1.01501	3.64974	523.894	555366	367520	68813.3	1.51112	8.07062	818.862	112432	358235	200385	0.31385	0.56108	595.464	106167	266490	99786.4	0.39839	1.06394	373.195	437704	621304	121705	0.704492	3.59642
825.264	216522	274464	134387	0.788891	1.61118	600.24	267541	263071	72927	1.01699	3.66862	525.406	552580	365004	68710.6	1.5139	8.04214	821.194	112693	358336	199882	0.314489	0.563797	597.224	105663	265569	98794.1	0.397873	1.06952	374.28	436056	620518	121730	0.702729	3.58215
827.64	216798	274067	134483	0.79104	1.61209	601.968	267881	262725	72742.2	1.01963	3.68261	526.925	549999	363160	68066.9	1.51448	8.08027	823.581	112763	358274	200333	0.314739	0.562877	598.96	105550	263630	97756.4	0.400373	1.07973	375.36	434742	621760	120870	0.699212	3.59678
830.027	216417	273133	134325	0.792352	1.61115	603.704	266642	261245	72185.9	1.02066	3.69383	528.409	548050	362023	67574	1.51385	8.11037	825.968	112764	357939	199903	0.315036	0.564093	600.688	105171	262502	97458.8	0.400649	1.07914	376.425	435244	619798	121283	0.702235	3.58865
832.414	217135	273675	134001	0.793402	1.6204	605.432	266462	260888	72113.4	1.02137	3.69505	529.928	545496	360974	67066.3	1.51118	8.13368	828.344	112385	357589	199865	0.314284	0.562301	602.416	104992	260986	96619.6	0.402289	1.08665	377.505	433932	621660	121307	0.698021	3.57714
834.79	217262	273697	133947	0.793803	1.622	607.16	266109	260131	71621	1.02298	3.71551	531.44	544670	358833	66854.6	1.51789	8.14709	830.72	112388	357257	199653	0.314586	0.562918	604.144	104155	258225	95967.2	0.403348	1.08531	378.585	435216	617872	119947	0.704379	3.62841
837.133	216791	273341	134325	0.793115	1.61393	608.888	265331	259559	71659.9	1.02224	3.70265	532.952	543104	357529	66590.6	1.51905	8.15587	833.107	111992	357117	199768	0.3136	0.560609	605.88	103600	257335	95094	0.402589	1.08945	379.67	434322	617918	120645	0.70288	3.59999
839.509	217224	273037	133673	0.795582	1.62504	610.616	265088	259368	71316.5	1.02205	3.71706	534.478	539477	355607	66173.1	1.51706	8.15251	835.483	111732	356834	198637	0.31312	0.562492	607.616	102918	255510	94825.8	0.402796	1.08534	380.745	432492	615326	119665	0.702866	3.6142
841.896	217329	273582	133082	0.794384	1.63305	612.352	264465	258605	71121.1	1.02266	3.71852	535.997	538329	354011	65363.6	1.52065	8.23591	837.859	111986	356715	198856	0.313938	0.563152	609.328	102683	254636	94006	0.403253	1.0923	381.825	432476	616602	120064	0.701386	3.60205
844.272	216465	272442	133023	0.794535	1.62727	614.048	264239	257561	70912.6	1.02593	3.72626	537.509	537597	352757	65029.3	1.52399	8.267	840.202	111458	355941	198560	0.313137	0.561333	611.064	102408	253986	93517.9	0.403201	1.09506	382.91	431622	615744	120156	0.700976	3.59217
846.659	216619	273234	133230	0.792798	1.6259	615.784	263536	257296	70484	1.02425	3.73895	539.007	535986	351046	64940	1.52683	8.25355	842.589	111721	355636	198421	0.314144	0.56305	612.8	101769	253184	93063.9	0.401956	1.09354	383.995	431770	613804	119737	0.703433	3.606
849.046	217429	273075	133351	0.796226	1.6305	617.512	263554	255959	70155.6	1.02967	3.7567	540.519	534760	349614	64720.1	1.52957	8.26265	844.965	111408	355975	198865	0.312966	0.560219	614.504	101851	251681	92291.7	0.404684	1.10358	385.075	428810	612604	119227	0.699979	3.59657
851.378	216843	272300	132561	0.796338	1.6358	619.256	262764	255462	69836.5	1.02858	3.76256	542.031	531481	347386	63984.4	1.52995	8.30642	847.363	111516	355295	198788	0.313869	0.560981	616.24	100890	250480	91484.5	0.402789	1.10282	386.16	428412	611284	118950	0.70084	3.60163
853.776	216509	272068	132497	0.79579	1.63406	620.992	261630	254469	69677.7	1.02814	3.75486	543.543	528946	346351	63653.3	1.52719	8.30979	849.739	111356	355552	198659	0.313193	0.56054	617.984	100336	248522	91485.5	0.403729	1.09674	387.22	427628	609300	119135	0.701835	3.58943
856.152	217459	271705	132006	0.800351	1.64734	622.72	260662	253760	69704	1.0272	3.73956	545.062	528134	344817	63277.6	1.53164	8.34631	852.082	111346	355927	198323	0.312835	0.56144	619.712	99776.2	247890	90572.4	0.402502	1.10162	388.305	427226	607618	118084	0.703116	3.61797
858.539	216255	272145	132331	0.794631	1.6342	624.416	260895	253436	69057.1	1.02943	3.77796	546.56	525276	342643	62607.1	1.53301	8.39003	854.513	110928	355145	198214	0.312346	0.55964	621.416	99621.4	246796	90194.5	0.403658	1.10452	389.385	426048	607294	117681	0.701551	3.62036
860.926	216899	271572	132225	0.79868	1.64037	626.144	259785	252454	68873.8	1.02904	3.7719	548.072	523487	341301	62583.1	1.5338	8.36467	856.845	111113	355204	197864	0.312814	0.561562	623.16	99534.2	245054	89675.1	0.406173	1.10994	390.465	428386	608604	117847	0.703883	3.63509
863.269	216801	271558	131577	0.798359	1.64771	627.88	259739	252084	68539.4	1.03037	3.78963	549.591	521661	340211	62028.3	1.53334	8.41006	859.221	111738	354910	198202	0.314835	0.56376	624.896	98817.6	245238	89364.9	0.402947	1.10578	391.545	428562	608222	118055	0.704614	3.63018
865.645	216849	271784	131994	0.797874	1.64288	629.608	259368	250689	68085.5	1.03462	3.80944	551.11	519681	337036	61944.9	1.54192	8.38942	861.531	111013	355445	197663	0.31232	0.561627	626.624	98578.1	243166	88219	0.405394	1.11743	392.63	426536	607372	117671	0.702265	3.62481
868.032	216943	270788	131885	0.801153	1.64494	631.344	258201	250619	67844.2	1.03026	3.80579	552.622	518080	335469	60900.3	1.54435	8.50702	863.907	110991	353869	197705	0.31365	0.561395	628.36	98499.8	242392	88398.9	0.406365	1.11426	393.715	424948	606122	117695	0.701093	3.6106
870.408	216923	271073	132064	0.800238	1.64256	633.072	257369	249969	67719.4	1.0296	3.80052	554.134	515544	334900	60578.9	1.5394	8.5103	866.349	111043	354293	197635	0.313421	0.561856	630.064	98056.1	241626	87960.1	0.405817	1.11478	394.795	426504	604580	117176	0.705455	3.63986
872.784	216423	270815	131573	0.799155	1.64489	634.808	256178	249146	67560.8	1.02822	3.79181	555.653	512720	332970	60502.6	1.53984	8.47435	868.725	110820	353855	196805	0.31318	0.563094	631.808	97943	240719	87397.2	0.406877	1.12066	395.86	425412	604104	117485	0.704203	3.621
875.182	216463	270995	131339	0.798772	1.64812	636.544	256382	248580	67296.8	1.03139	3.80973	557.165	511717	331797	59969.4	1.54226	8.53297	871.112	110967	354692	196864	0.312855	0.563676	633.536	97524.1	239159	87250	0.40778	1.11776	396.94	425662	604186	117234	0.704521	3.63089
877.558	216645	270616	131010	0.800563	1.65366	638.272	256194	247425	66983.5	1.03544	3.82473	558.677	508717	329086	59777.4	1.54585	8.51019	873.488	110733	352854	196340	0.313821	0.563985	635.304	96273.1	238402	86648.6	0.403826	1.11108	398.045	422452	602652	116852	0.700988	3.61528
879.89	216420	271001	131267	0.798595	1.6487	639.968	255788	247120	66865	1.03507	3.82543	560.196	506360	327540	59442.3	1.54595	8.51851	875.875	111004	352700	196674	0.314725	0.564405	637.08	96311	237688	86455	0.4052	1.114	399.13	422772	601626	116035	0.702716	3.64349
882.277	217133	269905	131257	0.80448	1.65425	641.696	255008	246772	66151.8	1.03337	3.85489	561.68	505936	326054	58791.6	1.55169	8.60558	878.251	110583	352360	196473	0.313835	0.56284	638.784	95878.2	235556	86068.6	0.407029	1.11397	400.19	421640	600616	116419	0.702013	3.62174
884.664	217035	270314	130936	0.802902	1.65756	643.44	254976	245445	65950.2	1.03883	3.86619	563.192	503139	324857	58278.3	1.5488	8.63338	880.594	110585	352222	195609	0.313965	0.565339	640.576	95057.1	234600	85036.4	0.405188	1.11784	401.27	421228	599426	116371	0.702719	3.61969
887.04	216416	269897	130184	0.801847	1.66239	645.168	253624	245470	66299.5	1.03322	3.82542	564.711	498963	322734	57609.9	1.54605	8.66107	882.981	110510	351751	196216	0.314171	0.563205	642.28	94632	233544	85079.2	0.4052	1.11228	402.355	420890	598470	115772	0.703277	3.6355
889.427	216384	269990	130956	0.801451	1.65233	646.896	253602	244421	65614.8	1.03756	3.86502	566.223	497354	319793	57281.9	1.55524	8.68258	885.357	110223	350914	195980	0.314102	0.562418	643.944	94484.1	232446	84417	0.406477	1.11925	403.455	419008	597328	115470	0.701471	3.62871
891.891	216400	269981	130262	0.801538	1.66127	648.632	253665	243285	65641.5	1.04267	3.8644	567.742	495163	317467	57363.7	1.55973	8.63199	887.733	110350	351020	195312	0.31437	0.564994	645.68	93996	230936	83743.4	0.407021	1.12243	404.555	418168	596484	116005	0.701055	3.60473
894.278	216065	269577	130838	0.801494	1.65139	650.368	252059	242828	65373.6	1.03802	3.85566	569.261	493104	314797	56678.9	1.56642	8.69997	890.12	110431	351372	195344	0.314285	0.565316	647.416	93530.5	230484	83057.7	0.405801	1.12609	405.64	419334	596436	115382	0.703066	3.63432
896.632	216605	269592	130233	0.803454	1.66321	652.064	251264	241920	64867	1.03862	3.87352	570.773	491296	314029	56072.9	1.56449	8.76174	892.507	110120	350035	194841	0.314598	0.565179	649.152	93126.9	229552	83323.1	0.405689	1.11766	406.7	419956	597752	115506	0.702559	3.6358
899.008	216851	269482	129753	0.804696	1.67126	653.8	251365	241156	64535.1	1.04233	3.89501	572.285	487847	311930	55590.1	1.56396	8.77579	894.894	109658	350951	194555	0.31246	0.563637	650.88	92683.6	227056	82961.5	0.408197	1.11719	407.785	419034	597448	115489	0.701373	3.62834
901.384	216984	269091	129591	0.806358	1.67437	655.528	250708	241095	64425.9	1.03987	3.89141	573.769	486977	309861	55344.9	1.5716	8.79896	897.226	109996	349605	194345	0.31463	0.565984	652.608	92790.9	226602	82592.7	0.409487	1.12347	408.87	420536	596256	115560	0.705294	3.63913
903.782	217250	268632	129666	0.808728	1.67545	657.264	250406	239814	64449.6	1.04417	3.8853	575.288	482424	308307	54961.9	1.56475	8.77744	899.624	109878	349240	194720	0.314621	0.564288	654.32	92029.4	226510	81403.8	0.406293	1.13053	409.955	419540	596572	115400	0.703251	3.63554
906.158	216339	268925	129237	0.80446	1.67397	659	249944	239412	63997.6	1.04399	3.90552	576.8	480977	306731	54292.3	1.56807	8.85903	902.011	109571	349225	193881	0.313754	0.565145	656.048	91379.6	224275	81083.6	0.407445	1.12698	411.035	418524	594304	114473	0.704225	3.65611
908.49	216709	269147	129918	0.805169	1.66804	660.8	248738	238035	63910.1	1.04496	3.89199	578.312	477980	303444	53866.9	1.57518	8.87336	904.398	109221	349719	194125	0.31231	0.562631	657.784	91663.8	223745	81255.2	0.40968	1.1281	412.115	417046	594078	114547	0.702005	3.64082
910.877	216043	267953	129815	0.806272	1.66424	662.528	248416	237250	63019.6	1.04707	3.94189	579.831	476000	301990	53790.4	1.57621	8.84916	906.785	109388	349085	193948	0.313357	0.564007	659.512	91200.2	223331	80827.2	0.408363	1.12834	413.2	417188	592676	114876	0.703906	3.63162
913.264	216115	269387	129966	0.802248	1.66286	664.232	248174	236690	63011.2	1.04852	3.93856	581.343	473643	300119	53293.7	1.57819	8.88741	909.117	109717	347832	193558	0.315432	0.566844	661.256	90658	221655	80320	0.409005	1.12871	414.26	415860	591738	114330	0.702777	3.63737
915.64	216149	268629	130165	0.804638	1.66058	665.96	246921	236295	62607.5	1.04497	3.94396	582.855	471796	298644	53030.9	1.57979	8.89663	911.504	108820	347629	193149	0.313035	0.563399	662.968	89886.4	221635	79679.2	0.40556	1.1281	415.305	415666	589960	114466	0.704566	3.63136
918.016	216165	268361	129035	0.805503	1.67525	667.696	247308	235439	62419.4	1.05041	3.96203	584.374	469600	295659	52448.6	1.58832	8.95353	913.891	109191	347699	192551	0.314039	0.567076	664.696	89929.4	219889	78917.4	0.408977	1.13954	416.385	415184	588712	113845	0.705241	3.64694
920.381	215659	267878	129053	0.805064	1.67109	669.432	246265	234450	62271.4	1.05039	3.95471	585.893	467846	294951	51834	1.58618	9.02585	916.278	108802	347312	193101	0.313268	0.563445	666.424	89282.2	218888	78862.2	0.407891	1.13213	417.465	414280	588488	113672	0.703974	3.64452
922.757	216067	267625	128785	0.807349	1.67773	671.16	245529	233122	62196.2	1.05322	3.94765	587.377	465061	293534	51631.7	1.58435	9.00728	918.654	109187	346828	192263	0.314817	0.567907	668.16	88953.4	218328	78583	0.407431	1.13197	418.545	413148	588586	114021	0.701933	3.62344
925.133	216344	267839	128885	0.807737	1.67858	672.896	244381	233428	61532.2	1.04693	3.9716	588.889	464046	290661	51176.3	1.59652	9.06759	920.986	108678	346170	191976	0.313945	0.566102	669.896	88392.9	216966	77981.4	0.407404	1.13351	419.635	412340	587576	113775	0.701765	3.62416
927.52	216455	267370	128471	0.809573	1.68486	674.592	244702	232064	61225.9	1.05446	3.99672	590.408	460159	288913	50547	1.59272	9.10358	923.373	108918	345895	191798	0.314888	0.567879	671.592	87940.4	216339	77569.8	0.406494	1.13369	420.74	414214	588610	113607	0.703716	3.64602
929.907	216471	267381	128534	0.809597	1.68416	676.328	243110	232082	61196.2	1.04752	3.97263	591.927	458189	286453	50249.4	1.59953	9.11828	925.749	109224	346176	191849	0.315514	0.569321	673.328	87766.1	215291	77087.9	0.407662	1.13852	421.85	413014	589128	113609	0.70106	3.63539
932.305	216442	267125	128130	0.810263	1.68924	678.056	242895	231202	60913.1	1.05057	3.98756	593.439	457237	285187	49896.1	1.60329	9.16378	928.136	108831	346012	192027	0.314529	0.566747	675.056	87682.7	212795	76888.9	0.412053	1.14038	422.915	412608	587566	113724	0.702233	3.62814
934.648	215985	266935	128117	0.80913	1.68584	679.784	242490	230248	60620.4	1.05317	4.00014	594.979	453396	283859	49097.3	1.59726	9.23464	930.512	108056	346437	191769	0.311907	0.563471	676.784	86804.9	213002	76176.1	0.40753	1.13953	423.995	412490	588054	114058	0.701449	3.61648
937.035	216136	267262	128075	0.808706	1.68758	681.52	241334	229319	60626	1.05239	3.9807	596.47	449153	281386	48796.1	1.59622	9.20468	932.899	108266	345741	191698	0.313143	0.564775	678.512	86732.4	211906	75851.1	0.409296	1.14346	425.085	412224	586206	113332	0.703207	3.63733
939.378	216210	266826	127234	0.810302	1.69931	683.248	241879	228572	59876.8	1.05821	4.03961	597.989	449119	280749	48649.7	1.59972	9.23168	935.275	108240	346043	191659	0.312794	0.564753	680.248	86368.2	210828	75225.9	0.409663	1.14812	426.145	410230	585704	113446	0.700405	3.61608
941.765	216075	266789	127045	0.809911	1.70077	684.976	241424	227754	59414.1	1.06002	4.06341	599.48	446894	278890	48028.7	1.6024	9.30473	937.629	108426	346024	191873	0.31335	0.565095	681.976	86117.6	209870	74989.5	0.410338	1.1484	427.195	409714	583046	113187	0.702713	3.6198
944.152	215933	266641	126998	0.809826	1.70028	686.704	239555	227478	59619.6	1.05309	4.01806	600.999	444920	276967	47661.1	1.6064	9.33507	940.016	107943	345453	191894	0.312467	0.562513	683.768	85848.9	208789	74832.4	0.411176	1.14722	428.255	409660	582802	112545	0.702915	3.63995
946.539	216310	266333	126536	0.81218	1.70947	688.44	239959	227039	58748.1	1.05691	4.08453	602.511	443030	274800	47397.4	1.61219	9.34713	942.37	108478	345255	191103	0.314198	0.567643	685.504	84755.4	208176	74284.5	0.407133	1.14096	429.34	408430	580966	112778	0.703019	3.62154
948.893	216243	265866	126696	0.813351	1.70678	690.176	239058	225685	58628.9	1.05925	4.07747	604.023	439849	272664	47106.1	1.61315	9.33739	944.801	108453	344477	190863	0.314833	0.568224	687.208	84946.5	207300	73831	0.409776	1.15055	430.385	408558	579590	112414	0.704909	3.63441
951.28	216085	265823	126505	0.81289	1.70812	691.872	238952	224939	58633.2	1.0623	4.07538	605.542	438027	272029	47078.6	1.61022	9.30417	947.133	107461	344558	190520	0.31188	0.56404	688.872	84742.1	206548	73830.4	0.410279	1.14779	431.475	407404	578844	111507	0.703823	3.65361
953.656	215194	265847	127020	0.809463	1.69417	693.608	238041	224229	58185.9	1.0616	4.09105	607.061	434993	269449	46388.3	1.61438	9.37721	949.52	108116	344803	190643	0.31356	0.567115	690.6	84389.5	205451	73511.4	0.410752	1.14798	432.555	406996	578726	111768	0.703262	3.64144
956.032	215837	266599	126885	0.809595	1.70104	695.344	237538	223868	57792.7	1.06106	4.11016	608.559	432271	268113	46079.6	1.61227	9.38098	951.907	107779	344138	190802	0.313186	0.564875	692.336	83880.2	204849	72791.6	0.409474	1.15233	433.635	407564	579820	112071	0.702915	3.63667
958.419	215471	265617	126202	0.811208	1.70735	697.088	235758	222366	57649.8	1.06022	4.08948	610.085	431999	266729	45880.9	1.61962	9.41566	954.294	107812	342328	190249	0.314937	0.566688	694.064	83860.1	204419	72526.8	0.410237	1.15626	434.715	408020	579792	112248	0.703735	3.63498
960.762	216044	264849	125636	0.815724	1.71959	698.784	236479	221332	57559.5	1.06843	4.10842	611.576	430577	264586	45623.3	1.62736	9.43766	956.626	107948	343051	189771	0.314671	0.568834	695.808	83322	203042	71874.8	0.410367	1.15927	435.785	406720	578892	111892	0.702584	3.63493
963.193	215787	264814	125720	0.814865	1.71641	700.536	236061	222015	57180.1	1.06327	4.12838	613.088	427506	263814	45217.6	1.62048	9.45442	959.002	107268	342162	189441	0.313501	0.566236	697.536	83158.6	202661	71677.7	0.410333	1.16017	436.865	405744	576002	111079	0.704414	3.65275
965.624	215101	265067	125715	0.811496	1.71103	702.264	235138	221014	57015.4	1.0639	4.12411	614.6	425669	261663	44599	1.62678	9.54435	961.378	107002	341958	190010	0.312909	0.563138	699.272	82839.4	201360	71057.9	0.411399	1.1658	437.915	404898	575856	111769	0.703124	3.62265
968	215436	265442	125569	0.811614	1.71568	703.968	234838	219275	56740	1.07097	4.13884	616.119	424360	259920	44186.9	1.63266	9.60376	963.677	107113	341211	188648	0.313919	0.567791	700.976	82297.5	200900	71130.6	0.409644	1.15699	438.985	403726	576502	111036	0.700303	3.63599
970.387	215566	265441	125186	0.812107	1.72196	705.696	233326	219032	56464.5	1.06526	4.13226	617.659	420539	258886	44201.1	1.62442	9.5142	966.053	106816	340408	188761	0.313789	0.565882	702.704	81682.6	200020	70616.1	0.408372	1.15671	440.085	403902	576650	111048	0.700428	3.63718
972.763	215476	264836	124454	0.813621	1.73138	707.424	232766	217919	56337.5	1.06813	4.13164	619.185	419297	257783	44134.3	1.62655	9.50049	968.44	107155	341097	188561	0.314149	0.56828	704.44	81859.8	198715	70322.5	0.411945	1.16406	441.17	404226	574418	111081	0.703714	3.63903
975.117	215371	263777	124399	0.816488	1.73129	709.176	233266	217819	55814.4	1.07092	4.17932	620.697	416557	254923	43374	1.63405	9.60384	970.816	106773	339866	188219	0.314161	0.567279	706.168	81960.1	198521	70005	0.412853	1.17078	442.235	402506	573996	110883	0.701235	3.63001
977.493	215798	264264	124104	0.816602	1.73885	710.912	232465	217014	55888.4	1.0712	4.15945	622.216	412936	254239	43305.3	1.62421	9.53546	973.247	106620	339811	187816	0.313763	0.567682	707.88	81821.4	198042	69554.2	0.413151	1.17637	443.315	403250	571764	110495	0.705274	3.64948
979.902	215266	263956	124115	0.815538	1.7344	712.608	231104	215892	55830.2	1.07046	4.1394	623.728	411134	251986	43031.9	1.63158	9.55418	975.634	106804	339530	188280	0.314563	0.56726	709.608	81388	197088	69385.4	0.412954	1.17298	444.38	400826	572090	109746	0.700635	3.6523
982.234	216342	263749	123850	0.820256	1.74681	714.344	230101	215780	54923.1	1.06637	4.18951	625.254	408577	251046	42875.9	1.6275	9.52931	978.01	106673	339498	187677	0.314207	0.568384	711.344	81035.5	196282	68711	0.412851	1.17937	445.46	400496	570056	110299	0.702556	3.63102
984.621	215614	263010	123678	0.819793	1.74334	716.112	230671	214498	54693.2	1.0754	4.21755	626.766	408023	249526	42277.1	1.63519	9.65115	980.386	106469	339314	187387	0.313778	0.568177	713.08	80927	196272	68817.1	0.41232	1.17597	446.545	399530	570638	109128	0.700146	3.66111
986.997	215522	262909	123445	0.819758	1.74589	717.808	229349	213972	54214.5	1.07186	4.2304	628.278	404856	247547	41913.6	1.63547	9.6593	982.773	106545	338255	187135	0.314986	0.569349	714.8	80274.9	195192	68455.8	0.41126	1.17265	447.625	399118	566924	109861	0.704006	3.63292
989.384	215245	263276	123745	0.817565	1.73942	719.544	229421	213202	54501.8	1.07607	4.20943	629.797	402964	245793	41781.9	1.63945	9.64448	985.204	106136	338227	186993	0.313802	0.567596	716.536	80077.5	194885	68622.6	0.410896	1.16693	448.705	397548	567410	109036	0.700636	3.64604
991.771	214524	263023	123535	0.815609	1.73655	721.272	228430	213040	54238.8	1.07224	4.21156	631.309	401556	245119	41425.3	1.63821	9.69349	987.536	105923	337502	186728	0.313843	0.567256	718.28	79952.6	193812	68126	0.412526	1.1736	449.79	397196	564628	108878	0.703465	3.6481
994.158	214978	262783	123175	0.818083	1.74531	723.008	227770	211619	53713.6	1.07632	4.24045	632.8	399931	243521	41047.4	1.64228	9.74315	989.912	105657	337072	186475	0.313456	0.566604	719.976	79748.4	193299	68082.2	0.412565	1.17135	450.875	397066	565316	108462	0.702379	3.66088
996.49	215105	262596	122141	0.819149	1.76113	724.712	227436	211035	53336.6	1.07772	4.26417	634.312	397804	241940	40859	1.64423	9.73603	992.299	105338	337727	186154	0.311903	0.565867	721.712	80183.5	194082	68143.5	0.413141	1.17669	451.955	396296	564886	108773	0.70155	3.64332
998.888	215081	262853	122625	0.818256	1.75397	726.448	227015	210598	53370.1	1.07796	4.2536	635.831	395669	242354	40275.7	1.6326	9.824	994.642	105282	336451	185650	0.312919	0.567098	723.44	79606.5	193315	67789.1	0.411797	1.17433	453.035	395636	563130	108692	0.702566	3.63997
1001.28	214876	262000	122326	0.820139	1.75658	728.184	226950	210048	53049	1.08047	4.27812	637.343	393566	239623	40302.6	1.64244	9.76528	997.04	105515	336589	185793	0.313484	0.56792	725.176	79754.6	192968	67502.7	0.413306	1.1815	454.1	393968	561396	108013	0.701765	3.64743
1003.65	215029	262386	122088	0.819513	1.76126	729.912	225435	209118	52975.2	1.07803	4.25548	638.855	392156	238450	39744.3	1.6446	9.86697	999.427	105137	335636	185644	0.313248	0.566339	726.904	78927.2	191322	67139.2	0.412535	1.17558	455.18	393722	559094	107328	0.704214	3.66839
1006.13	215516	261936	121909	0.822781	1.76784	731.64	224870	208128	52441.5	1.08044	4.28802	640.367	390031	236819	39410	1.64696	9.89676	1001.81	105246	335939	185542	0.31329	0.567238	728.64	78780.4	191384	67458	0.411636	1.16784	456.265	392340	559086	107381	0.701753	3.65371
1008.46	215222	261365	121396	0.823455	1.77289	733.368	223848	207430	52439.4	1.07915	4.26869	641.886	387630	235139	39314.9	1.64852	9.85963	1004.15	105153	334678	184589	0.314191	0.569658	730.4	78462	190668	67165.9	0.411512	1.16818	457.345	392694	556958	106232	0.705069	3.69656
1010.85	214283	261784	121295	0.818549	1.76662	735.072	223532	206354	52009.2	1.08325	4.29794	643.405	385504	233934	38958.3	1.64792	9.89531	1006.52	105059	334138	185025	0.314418	0.567812	732.136	78157.5	189988	66492.7	0.411382	1.17543	458.43	392700	557490	107288	0.704407	3.66023
1013.23	214400	261056	120975	0.821279	1.77227	736.816	223659	206271	51704.8	1.08429	4.32569	644.917	384400	232907	38409.3	1.65044	10.008	1008.9	104909	333985	184685	0.314114	0.568042	733.864	78105.1	189864	66120.1	0.411375	1.18126	459.535	392186	557596	106938	0.703352	3.66743
1015.61	215283	260898	121141	0.82516	1.77713	738.544	222895	205378	51468.8	1.08529	4.33069	646.401	381524	231640	38148.7	1.64706	10.001	1011.29	104968	333293	184397	0.314943	0.56925	735.6	77921	188191	66017.7	0.414052	1.1803	460.635	392858	555080	106971	0.70775	3.67258
1018	215236	261267	120978	0.823817	1.77913	740.272	222616	205591	51360.6	1.08281	4.33438	647.927	380024	229973	38157.1	1.65247	9.95945	1013.58	104580	333845	184135	0.31326	0.567954	737.328	77400.9	187890	65358.9	0.411948	1.18424	461.695	390390	555530	106949	0.702734	3.65024
1020.37	215147	261073	120621	0.824089	1.78366	742	222389	204112	51103.2	1.08954	4.35175	649.446	377900	228350	37394.6	1.65492	10.1057	1015.96	104409	332333	183388	0.31417	0.569334	739.064	77088.2	187692	65139	0.410716	1.18344	462.78	388856	552342	106109	0.704013	3.66468
1022.76	214368	260895	120893	0.821666	1.77321	743.712	221306	203516	50692.4	1.08741	4.36567	650.958	377299	227693	37081.3	1.65705	10.1749	1018.35	104646	332378	183219	0.314841	0.571154	740.792	76810.9	186864	64856.6	0.411053	1.18432	463.865	389838	551780	105933	0.70651	3.68006
1025.13	214566	259888	120605	0.82561	1.77908	745.44	221512	203065	50944.6	1.09085	4.3481	652.456	375039	225893	37024.4	1.66025	10.1295	1020.69	104080	333584	183141	0.312006	0.568306	742.52	76733.4	185981	65316.4	0.412587	1.1748	464.945	388332	549976	105014	0.706089	3.69791
1027.51	214691	260032	120331	0.825633	1.78417	747.176	220435	201560	50385.7	1.09364	4.37495	653.982	372687	224734	36887.1	1.65835	10.1034	1023.08	104025	331303	182604	0.313986	0.569674	744.256	76312.9	185821	65178.6	0.410679	1.17083	466.025	387088	549822	105330	0.704024	3.67499
1029.85	214839	259030	120360	0.829398	1.78497	748.912	219882	201634	50074.8	1.0905	4.39109	655.494	371250	223431	36525	1.66158	10.1643	1025.46	103785	330944	182745	0.313605	0.567926	746.048	75508.5	184701	64196.6	0.408814	1.17621	467.105	386424	549272	105389	0.70352	3.66663
1032.24	214588	259404	119888	0.827237	1.7899	750.648	219712	200976	50095	1.09323	4.38592	656.992	369360	222140	36261.9	1.66274	10.1859	1027.84	103720	330991	182202	0.313362	0.569259	747.776	75551.4	183948	63985.4	0.410722	1.18076	468.155	385916	546900	105440	0.705643	3.66007
1034.63	214218	259587	119655	0.825226	1.79031	752.352	218350	199801	49329.9	1.09284	4.42632	658.511	367147	220949	35866.7	1.66169	10.2364	1030.24	103780	330483	181875	0.314025	0.570613	749.48	75141.1	182325	63697.1	0.412127	1.17966	469.235	385878	547300	104458	0.705058	3.6941
1036.97	213774	259398	119361	0.824114	1.79099	754.088	217518	199552	49297.5	1.09003	4.41234	660.023	365736	219540	35861.3	1.66592	10.1986	1032.62	103729	330617	182210	0.313744	0.569283	751.152	74492	182311	63374.2	0.408598	1.17543	470.305	385232	545664	104702	0.705988	3.6793
1039.36	214226	259074	119157	0.826894	1.79785	755.816	217355	198502	49065.6	1.09497	4.42988	661.535	364196	217914	35111.7	1.67128	10.3725	1034.96	103231	329602	181543	0.313199	0.568631	752.888	74619.9	179925	63051.1	0.414728	1.18348	471.385	382856	543114	103583	0.704928	3.69612
1041.73	213696	258690	119295	0.826071	1.79133	757.552	217124	197912	48837.7	1.09707	4.44582	663.054	361774	217363	35162	1.66438	10.2888	1037.33	103432	329656	181139	0.313756	0.571008	754.616	74512.7	180008	62754.6	0.413942	1.18737	472.47	382734	542376	103907	0.705662	3.68344
1044.16	213821	258675	118987	0.826602	1.79701	759.28	216114	197672	48361	1.09329	4.46876	664.552	360414	215697	35006	1.67093	10.2958	1039.72	103229	329047	181556	0.313721	0.568579	756.352	73744.5	178860	62144.2	0.412303	1.18667	473.555	381320	539590	102544	0.706685	3.71859
1046.58	213789	258242	119554	0.827864	1.78823	761.008	214921	196565	48335.7	1.09339	4.44642	666.078	358137	214554	34474.7	1.66921	10.3884	1042.1	102936	328651	180986	0.313209	0.568752	758.08	73855.5	178198	62073.6	0.414459	1.1898	474.625	382278	540668	103485	0.707048	3.69403
1049	213368	258684	118699	0.824823	1.79756	762.744	214754	195714	47914.4	1.09728	4.48203	667.569	355886	213039	34417.1	1.67052	10.3404	1044.47	103118	328615	180328	0.313796	0.571836	759.808	73116.2	177151	61484	0.412733	1.18919	475.715	379824	536998	102575	0.70731	3.70288
1051.34	213875	257912	119091	0.829258	1.7959	764.448	213992	195082	47841.1	1.09693	4.47298	669.088	354953	211214	33966.4	1.68053	10.4501	1046.85	102944	328218	180185	0.313644	0.57132	761.512	72998.5	176410	61088	0.4138	1.19497	476.795	379942	537626	102249	0.706703	3.71584
1053.72	214000	257809	118555	0.830072	1.80506	766.184	214195	194275	47624.8	1.10254	4.49756	670.6	353387	210143	33462.1	1.68165	10.5608	1049.2	102505	327011	179607	0.313462	0.57072	763.24	72532.1	176070	61091.9	0.411951	1.18726	477.875	380212	537178	102416	0.707795	3.71243
1056.11	213933	258153	117996	0.828706	1.81305	767.92	212736	193409	47181.2	1.09993	4.50892	672.119	350219	208916	33162.7	1.67636	10.5606	1051.59	101885	327237	179325	0.31135	0.568162	764.976	72278.2	174420	60310.2	0.414392	1.19844	478.98	379430	537252	102447	0.706242	3.70368
1058.49	213897	257667	118140	0.83013	1.81054	769.648	212518	192715	47036.5	1.10276	4.51814	673.638	349176	207669	33340.3	1.68141	10.4731	1053.99	102316	325229	178985	0.314598	0.571646	766.704	71540.5	173515	60039.4	0.412302	1.19156	480.075	377684	536100	102307	0.704503	3.69168
1060.82	213925	256965	117898	0.832507	1.81449	771.376	211656	191900	46887.6	1.10295	4.51412	675.157	346653	206854	32734.9	1.67583	10.5897	1056.33	101811	325425	179114	0.312856	0.568415	768.432	71311.8	172559	59908.6	0.413261	1.19034	481.155	379656	536320	102289	0.707891	3.71159
1063.2	213220	257382	118193	0.828419	1.804	773.112	211012	191286	46467	1.10312	4.54113	676.648	344987	205357	32409	1.67994	10.6448	1058.71	102093	325514	178070	0.313636	0.573329	770.168	70691.2	172260	59858.4	0.410375	1.18098	482.24	378762	535704	101656	0.707036	3.72592
1065.59	213436	257285	118148	0.82957	1.80651	774.84	210651	191171	46348	1.1019	4.54499	678.16	343006	203971	31989	1.68164	10.7226	1061.09	102047	323710	178634	0.315243	0.571266	771.896	70603.6	171361	59298.5	0.412016	1.19065	483.305	378172	536290	101897	0.705163	3.71132
1067.98	213356	256629	117754	0.83138	1.81189	776.552	210475	190086	46411.4	1.10726	4.53499	679.686	341997	202631	31912.4	1.68778	10.7167	1063.48	101734	323815	178438	0.314172	0.570134	773.632	70500.4	170209	58955.6	0.414199	1.19582	484.39	377064	534744	102241	0.70513	3.68801
1070.33	213921	256731	117276	0.83325	1.82408	778.296	209901	189069	45918.4	1.11018	4.57118	681.198	338823	201437	31671.7	1.68203	10.698	1065.95	101855	323262	177709	0.315087	0.573158	775.36	69985.8	169929	58401.9	0.411853	1.19835	485.47	376338	532772	101748	0.706377	3.69872
1072.72	213998	256482	116854	0.83436	1.83134	780.024	209322	188202	45391.6	1.11222	4.61148	682.717	337573	201041	31535.4	1.67912	10.7046	1068.42	101286	322941	178005	0.313637	0.569007	777.08	69447.1	167785	57971.8	0.413905	1.19795	486.515	375966	530068	100639	0.709279	3.73577
1075.1	213035	256255	116656	0.83134	1.82618	781.728	208471	187820	45196.8	1.10995	4.61253	684.208	335380	198436	31109.3	1.69012	10.7807	1070.8	101770	322908	178471	0.315167	0.570233	778.808	69138.5	167425	57330.7	0.412952	1.20596	487.58	374514	527350	100727	0.710181	3.7181
1077.47	213162	256358	116400	0.8315	1.83129	783.456	207885	186469	44753.5	1.11485	4.64511	685.727	333334	196957	30906.4	1.69242	10.7853	1073.15	100894	321902	177074	0.31343	0.569784	780.584	69003.8	166505	57195.9	0.414424	1.20645	488.66	372376	523066	99087.2	0.71191	3.75806
1079.86	213628	255459	116698	0.836252	1.8306	785.192	207442	186192	44626.5	1.11413	4.64842	687.232	331287	196314	30671.7	1.68753	10.8011	1075.53	101007	321433	176666	0.314241	0.57174	782.312	68574.2	165966	57284.9	0.413182	1.19707	489.705	371196	523308	98989.2	0.709326	3.74986
1082.24	212618	255416	116371	0.832438	1.82707	786.928	206215	185395	44511.4	1.1123	4.63286	688.744	330446	194961	30315.4	1.69493	10.9002	1077.9	100585	320935	176450	0.313414	0.570051	784.048	67708.9	164310	56638.4	0.41208	1.19546	490.785	371162	521604	98881.2	0.711578	3.75362
1084.58	213388	255235	116300	0.836047	1.83481	788.664	206145	184718	44252.5	1.116	4.65838	690.284	328234	193566	30251.9	1.69573	10.8501	1080.28	100803	320323	176200	0.314691	0.572093	785.784	67952.6	163232	56054.5	0.416293	1.21226	491.875	370604	522628	98843	0.709116	3.74942
1086.97	212893	254978	115836	0.834945	1.83787	790.368	204305	183931	44076.8	1.11077	4.63521	691.831	325094	192243	29960	1.69106	10.8509	1082.66	100687	320048	175664	0.3146	0.573182	787.52	67361.9	163005	55620.4	0.41325	1.2111	492.955	369666	521520	99075.4	0.708824	3.73116
1089.35	211892	254995	115887	0.830963	1.82843	792.112	204769	182971	43572.2	1.11913	4.69952	693.343	324740	190561	29548.6	1.70412	10.99	1084.96	100519	319763	175967	0.314355	0.571237	789.232	67290.8	161578	55266.9	0.416461	1.21756	494.055	369400	520752	99182.8	0.709359	3.72444
1091.71	213440	255116	115888	0.836638	1.84178	793.848	203961	182232	43305.1	1.11924	4.70986	694.862	321669	189584	29505.3	1.6967	10.9021	1087.31	99985.5	320050	175592	0.312406	0.56942	790.912	66617.6	160155	54668.2	0.415957	1.21858	495.14	368612	518492	98460.4	0.710931	3.74376
1094.08	212900	254578	116130	0.836285	1.83329	795.552	203320	181066	43058.4	1.1229	4.72196	696.353	320310	188421	29169	1.69997	10.9812	1089.68	100318	318615	174953	0.314858	0.573402	792.624	66382.1	159224	54818.5	0.416911	1.21094	496.225	367512	518392	98444.8	0.708946	3.73318
1096.46	212827	253945	114938	0.838083	1.85167	797.296	202049	179982	42413.5	1.1226	4.76378	697.865	319929	186940	28488.3	1.7114	11.2302	1092.11	100224	318748	175403	0.314429	0.571392	794.352	66273.8	158469	54222	0.418213	1.22227	497.33	366478	517208	97405.4	0.70857	3.7624
1098.85	212617	254302	115150	0.836082	1.84644	799.032	201674	179450	42241.1	1.12384	4.77435	699.384	317586	186479	28877	1.70307	10.9979	1094.46	99867.3	318415	174957	0.313639	0.570809	796.088	66090.6	158115	53763	0.417991	1.2293	498.39	367124	516430	97821.4	0.710888	3.753
1101.21	212307	253713	114922	0.836802	1.84741	800.72	201279	178249	42238.1	1.1292	4.76533	700.98	316531	185694	28436	1.70458	11.1314	1096.74	99603.6	317771	174835	0.313445	0.569702	797.76	65488.6	156830	53574.2	0.417577	1.22239	499.435	366616	517588	97773.6	0.708316	3.74964
1103.63	212585	253607	115374	0.838247	1.84258	802.48	200060	178110	41641.8	1.12324	4.80431	702.45	314560	184144	28288.1	1.70823	11.1199	1099.13	100009	318425	174413	0.314074	0.573405	799.472	65428.2	156480	53343.6	0.418125	1.22654	500.5	366686	514480	97082	0.712731	3.77708
1106.05	212044	253535	115266	0.83635	1.8396	804.24	199550	177159	41358.5	1.12639	4.82488	703.99	312120	183176	28046	1.70394	11.1289	1101.54	99312.7	317415	174135	0.312879	0.570319	801.2	64876.1	155040	52719.4	0.418448	1.23059	501.6	365282	512840	97251.4	0.712273	3.75606
1108.36	211794	253605	115325	0.835133	1.83649	805.92	198592	175964	41300.1	1.1286	4.80852	705.53	311170	182299	27688	1.70693	11.2384	1103.85	99421.8	317155	174929	0.313481	0.568355	802.96	64213.2	154590	52245.6	0.415378	1.22906	502.65	364956	512944	96717	0.711493	3.77344
1110.67	211603	253301	115375	0.835381	1.83405	807.68	198191	174435	41189.8	1.13619	4.81166	707	309616	180507	27419.6	1.71525	11.2918	1106.27	99255.5	316220	173910	0.313881	0.570729	804.64	64059.6	153024	52704.4	0.418625	1.21545	503.75	363024	511388	96177.8	0.70988	3.77451
1113.09	212205	253037	114613	0.838633	1.8515	809.36	197180	174294	40808.1	1.13131	4.83188	708.54	309043	180487	27322.1	1.71227	11.3111	1108.58	99428.2	316232	173249	0.314415	0.573903	806.4	63921.8	152030	51871.6	0.420455	1.23231	504.85	363974	513986	96978.4	0.70814	3.75315
1115.51	212129	252097	114513	0.841457	1.85245	811.12	196258	172422	40401.6	1.13824	4.85766	710.01	307254	179767	27166.1	1.70918	11.3102	1111	99320	315697	173220	0.314605	0.573375	808.08	63260.2	151464	51315.9	0.417659	1.23276	505.9	363950	514646	97533.8	0.707185	3.73153
1117.93	211977	252642	114355	0.839043	1.85368	812.8	194776	172088	40191.9	1.13184	4.84616	711.55	305893	178597	27096.9	1.71275	11.2889	1113.31	99025.5	315464	172735	0.313904	0.573281	809.76	62824	150724	50770.9	0.416816	1.2374	506.95	363860	514796	98182.2	0.706804	3.70597
1120.35	212075	252263	114044	0.840693	1.8596	814.56	195152	171450	39694.4	1.13825	4.91638	713.02	304539	178214	26906	1.70883	11.3186	1115.73	98973.6	315083	172587	0.31412	0.57347	811.44	62574.8	149641	50975.7	0.418165	1.22754	508.05	362876	514170	97091	0.705751	3.73748
1122.66	211167	251905	113694	0.83828	1.85734	816.32	194141	170210	39199.2	1.1406	4.95268	714.63	304096	176596	26960.1	1.72199	11.2795	1118.15	98702.7	315100	172945	0.313243	0.570716	813.2	61823.9	149101	50238.5	0.414644	1.23061	509.1	362964	511754	96767.8	0.709255	3.75088
1125.08	211550	251708	113553	0.840457	1.86301	818	193374	169199	39628.6	1.14288	4.87965	716.17	302789	176510	26648.6	1.71542	11.3623	1120.46	98568.2	314474	173355	0.313439	0.56859	814.88	62267	148129	49779.2	0.420357	1.25086	510.2	362244	512700	97182.6	0.706542	3.72746
1127.5	211576	251665	113475	0.840708	1.86453	819.76	192896	168332	38716.6	1.14592	4.98226	717.71	301180	175144	26393.9	1.71961	11.411	1122.88	98610	314489	172450	0.313556	0.571818	816.64	61436.9	147566	49717.7	0.416334	1.23571	511.25	362840	509732	96545.8	0.711825	3.75822
1129.81	211444	251344	113070	0.841253	1.87002	821.52	191949	168118	38649.9	1.14175	4.96635	719.18	299089	173823	26187.4	1.72065	11.4211	1125.3	98560.9	314732	172617	0.313158	0.570979	818.32	61218.5	146888	49588.5	0.416771	1.23453	512.35	361100	510518	96192	0.707321	3.75395
1132.23	211741	251090	113266	0.843287	1.86941	823.2	190480	167212	38493.9	1.13915	4.94832	720.72	297331	172789	25691.9	1.72078	11.573	1127.61	98492.7	313624	172400	0.314048	0.571304	820.08	60849.1	145315	49127.7	0.418739	1.23859	513.45	361004	507368	96386.8	0.711523	3.74537
1134.65	211524	250853	112544	0.843218	1.87948	824.96	189802	166176	38540.7	1.14218	4.92472	722.26	295750	171470	25906.3	1.72479	11.4161	1130.03	98102.7	313867	171927	0.312561	0.570606	821.84	60668.5	145628	48848.9	0.416601	1.24196	514.5	359878	507204	95692.6	0.709533	3.76077
1136.96	211302	251318	112307	0.840774	1.88146	826.64	189156	165289	38041.6	1.1444	4.97235	723.73	293541	171051	25195.4	1.7161	11.6506	1132.34	98133.6	312753	171453	0.313774	0.572366	823.52	60477.2	144191	48832.1	0.419424	1.23847	515.6	359194	505772	95254.8	0.71019	3.77088
1139.38	211345	249960	112786	0.845517	1.87386	828.4	188498	164290	37599.8	1.14735	5.01326	725.27	292159	169340	25218.4	1.72528	11.5851	1134.76	97874.5	312089	171067	0.313611	0.572141	825.2	59801.5	142869	48140.4	0.418576	1.24223	516.65	358768	504986	95570.8	0.710451	3.75395
1141.69	211094	250483	112475	0.842747	1.87681	830.08	188192	163596	37444.2	1.15035	5.02594	726.81	289023	167911	25197.9	1.72128	11.4701	1137.18	97716.4	311745	171266	0.313449	0.570552	826.96	59870.7	142822	47890	0.419197	1.25017	517.75	359024	505692	96032.6	0.709966	3.73856
1144.11	210608	250873	112187	0.839502	1.87729	831.84	186979	162602	37143.8	1.14991	5.03392	728.28	288780	167461	24912	1.72446	11.592	1139.49	97462.7	310747	171368	0.31364	0.568733	828.64	59294.4	141098	47671	0.420237	1.24382	518.8	359834	507718	95966.4	0.708728	3.74958
1146.53	211436	250478	111855	0.844131	1.89026	833.6	186958	161735	37099.6	1.15595	5.03934	729.82	285856	166611	24548.7	1.7157	11.6444	1141.91	97591.8	311325	171041	0.313472	0.570576	830.4	58910.6	140418	47131.1	0.419539	1.24993	519.85	359082	506156	95281.6	0.70943	3.76864
1148.84	210850	249555	111511	0.844902	1.89085	835.36	185525	160658	36764.9	1.15479	5.04626	731.29	285239	164807	24535	1.73074	11.6258	1144.22	97162.7	310375	170093	0.31305	0.571234	832.16	58469	139310	46937.9	0.419704	1.24567	520.9	357932	504342	95522.8	0.709701	3.74708
1151.15	211073	250157	112025	0.84376	1.88416	837.04	184690	159564	36317.2	1.15747	5.08546	732.83	283817	163897	24101.7	1.73168	11.7758	1146.64	97300	309756	170636	0.314118	0.570218	833.84	58067.6	139432	46855	0.416457	1.2393	522	359044	506782	95924.4	0.708478	3.74299
1153.57	210211	249317	111426	0.843146	1.88655	838.8	184069	159155	36107	1.15654	5.09787	734.37	282190	162806	24017.6	1.73329	11.7493	1149.06	97130	310264	170195	0.313056	0.5707	835.52	57753	138288	46228.9	0.41763	1.24928	523.05	358624	507004	95636.8	0.70734	3.74985
1155.99	210955	249819	111509	0.844433	1.89182	840.48	183222	158432	35758	1.15647	5.12396	735.91	280570	160891	23747.4	1.74385	11.8148	1151.37	97363.6	309726	170105	0.314354	0.572372	837.28	57704.6	137562	46018.5	0.419479	1.25394	524.15	356898	505380	94987.6	0.706197	3.75731
1158.3	210440	248947	111040	0.84532	1.89517	842.24	181962	157031	35550.7	1.15877	5.11839	737.45	278619	159397	23617.4	1.74795	11.7972	1153.79	96831.8	309673	169888	0.312691	0.569974	839.04	57346.8	137128	46019.1	0.4182	1.24615	525.25	356450	503736	95488	0.707613	3.73293
1160.83	210614	248884	110969	0.846233	1.89795	843.92	181462	155895	35455.7	1.164	5.118	738.92	277016	158889	23388.6	1.74346	11.8441	1156.1	97073.6	309062	169953	0.314091	0.57118	840.72	56646	135506	45185.4	0.418032	1.25364	526.3	355508	501346	94594	0.709107	3.75825
1163.25	209993	248871	110538	0.843782	1.89973	845.68	180395	155060	35005.6	1.16339	5.15331	740.46	275827	157056	22970.3	1.75624	12.008	1158.52	96979.1	308023	169689	0.314844	0.57151	842.4	56732.7	134579	44885.6	0.421558	1.26394	527.4	355596	503252	94474.2	0.706596	3.76395
1165.56	210882	248304	110191	0.84929	1.91379	847.44	179692	154212	34490.6	1.16523	5.20989	741.93	274417	156159	22714.4	1.7573	12.0812	1160.94	96879.1	308993	169255	0.313532	0.572387	844.16	55957.9	133364	44750.2	0.419588	1.25045	528.45	354980	500206	94523.8	0.709668	3.75546
1167.87	209960	248681	110331	0.844295	1.903	849.12	178934	153622	34425.9	1.16476	5.19765	743.47	271800	154954	22654	1.75407	11.9979	1163.25	96273.6	307716	169580	0.312865	0.567718	845.92	55791.2	133188	44342.2	0.418893	1.2582	529.55	354228	501176	94279.8	0.706794	3.7572
1170.29	210308	247700	110721	0.849044	1.89944	850.88	178449	152728	34388.8	1.16841	5.18916	745.01	270750	153799	22348.9	1.76042	12.1147	1165.67	96649.1	307415	168890	0.314393	0.572261	847.6	55381.9	132275	44164.2	0.418687	1.254	530.6	354674	498916	94434.8	0.710889	3.75576
1172.71	210055	248303	110079	0.845961	1.90821	852.56	177354	151985	34072.6	1.16692	5.20517	746.48	268976	153950	22143.3	1.74716	12.1471	1167.98	96470	307446	168248	0.313778	0.573379	849.36	54943.5	130912	43851	0.419696	1.25296	531.7	354506	500724	95219	0.707987	3.72306
1175.02	210585	247497	109467	0.850856	1.92372	854.32	176760	150694	33655.9	1.17297	5.25198	748.02	268371	152749	21985.7	1.75695	12.2066	1170.4	96260	306297	168815	0.31427	0.570208	851.12	54512.1	130479	43607.5	0.417785	1.25006	532.75	353164	501720	94529	0.703907	3.73604
1177.44	210065	247242	109494	0.849636	1.91852	856.08	175772	150276	33577.6	1.16966	5.23481	749.49	267201	151740	21597.3	1.76092	12.372	1172.71	95660.9	306016	168393	0.312601	0.568082	852.88	54524.8	130195	43677.9	0.418793	1.24834	533.85	352588	499902	94900.6	0.705314	3.71534
1179.75	209658	246920	109314	0.849094	1.91795	857.76	175152	149630	33297.8	1.17057	5.26019	751.03	265847	151436	21730.9	1.75551	12.2336	1175.13	96027.3	306426	167618	0.313378	0.572893	854.56	54123.5	129652	43378.1	0.41745	1.24771	534.95	353106	499242	94367.8	0.707284	3.74181
1182.17	209768	246675	109332	0.850381	1.91864	859.52	174452	148569	33136.9	1.17422	5.2646	752.5	263839	150540	21522.7	1.75261	12.2586	1177.55	95904.5	305645	167299	0.313778	0.573252	856.32	53692.2	129455	43301.4	0.414756	1.23997	536	352450	497826	94313	0.707978	3.73702
1184.59	209732	246455	109246	0.850996	1.91981	861.28	173532	147541	32866.4	1.17616	5.27994	754.04	262267	148944	21292.9	1.76084	12.3171	1179.86	95813.6	305318	167055	0.313816	0.573547	858	53557	128976	42977.9	0.415247	1.24615	537.1	351712	496924	93958.8	0.707778	3.74326
1187.01	209871	246396	108606	0.851761	1.9324	862.96	172425	146389	32481.6	1.17786	5.30839	755.58	261716	148944	21338.9	1.75714	12.2647	1182.28	95599.1	304980	166612	0.31346	0.573783	859.76	53155.2	127135	42357	0.418101	1.25493	538.2	349754	495788	93414.2	0.705451	3.74412
1189.32	209846	246226	108936	0.85225	1.92632	864.72	171471	145735	32390.9	1.1766	5.29381	757.05	259921	147474	21037.1	1.76249	12.3554	1184.7	95261.8	303695	167371	0.313676	0.569166	861.52	52575.6	127149	42276.4	0.413497	1.24362	539.25	349176	494686	93374.8	0.705854	3.73951
1191.63	209188	246292	108418	0.849351	1.92946	866.4	171081	144578	32188.9	1.18332	5.31492	758.59	258731	147147	21050.6	1.75832	12.2909	1187.01	95114.5	303915	166317	0.312964	0.571886	863.2	52639.8	125901	42178.2	0.418103	1.24803	540.35	347404	494670	93380	0.702294	3.72033
1194.05	208731	245400	108045	0.850574	1.9319	868.16	170055	143495	31876.9	1.18509	5.33475	760.13	258491	145720	20670.6	1.77389	12.5053	1189.43	95569.1	304449	166455	0.313908	0.574145	864.96	52256.9	125474	42065.9	0.416477	1.24226	541.4	347998	492134	93406	0.70712	3.72565
1196.47	209324	245510	108704	0.852607	1.92564	869.84	169628	143580	31824.7	1.18141	5.33005	761.6	257073	144873	20422.9	1.77447	12.5875	1191.74	94969.1	302989	166256	0.313441	0.571221	866.64	51912.4	124198	41167	0.41798	1.26102	542.5	347380	493384	92986.8	0.704076	3.7358
1198.78	208143	244882	108142	0.849972	1.92472	871.6	169174	142470	31167.4	1.18743	5.42791	763.14	254266	144101	20431.4	1.76449	12.4448	1194.16	94887.3	303401	166025	0.312746	0.571522	868.32	51890.4	124116	41341.9	0.41808	1.25515	543.6	348692	492136	92706.6	0.708528	3.76124
1201.2	209301	244569	107702	0.855795	1.94334	873.36	168340	141871	31233.1	1.18657	5.38979	764.61	254696	143723	20007.3	1.77213	12.7301	1196.58	94862.7	302875	166415	0.313208	0.570039	870.08	51535.1	123980	40980.2	0.415674	1.25756	544.65	347778	490740	93366.6	0.708681	3.72487
1203.51	208302	244884	107836	0.850616	1.93165	875.04	167065	140398	30979.6	1.18994	5.39274	766.15	253944	143391	20214.9	1.77099	12.5623	1198.89	95017.3	302540	165483	0.314065	0.574182	871.76	51510.6	123341	41083.1	0.417628	1.25381	545.75	347856	492250	92517.8	0.706665	3.75988
1205.93	209135	244183	108045	0.856471	1.93564	876.8	166638	140252	30718	1.18812	5.42475	767.69	250987	142921	20241.7	1.75612	12.3995	1201.31	94497.3	301976	165450	0.312929	0.571153	873.52	51154.9	122651	40724	0.417075	1.25614	546.8	345522	490296	92214	0.704721	3.74696
1208.35	208062	244093	107354	0.852388	1.9381	878.56	165305	139378	30250.9	1.18602	5.46447	769.16	250680	141143	19666.6	1.77608	12.7465	1203.62	94570	301485	164896	0.31368	0.573512	875.28	50966.9	121873	40797.8	0.418196	1.24926	547.9	345780	490568	92554.8	0.704856	3.73595
1210.66	208089	243841	106976	0.853381	1.94519	880.24	164854	137976	30104.7	1.1948	5.476	770.7	249866	140266	19582.3	1.78137	12.7598	1206.04	94857.3	301118	165342	0.315017	0.573704	876.96	50427	121804	40282.8	0.414001	1.25183	549	345482	490486	92474.2	0.704367	3.73598
1213.08	208510	243955	106973	0.854708	1.94919	881.92	164569	137714	29903.4	1.19501	5.50335	772.17	247970	139837	19336.6	1.77327	12.8239	1208.35	94576.4	300830	164857	0.314385	0.573686	878.72	50379.9	121146	40401.4	0.415862	1.24698	550.05	344572	488666	92298	0.705128	3.73326
1215.5	208058	243726	107091	0.853655	1.94282	883.68	163462	136830	29528.2	1.19464	5.5358	773.71	246620	139386	19190.9	1.76933	12.8509	1210.77	93942.7	300229	164508	0.312903	0.571052							551.15	345752	488830	91606.6	0.707305	3.77431
1217.81	207989	242736	106354	0.856852	1.95564	885.44	162540	135352	29534.6	1.20086	5.50337	775.18	244949	138043	19253.6	1.77443	12.7222	1213.19	93546.4	300010	164520	0.311811	0.568602							552.25	345572	487840	91946.2	0.708372	3.75842
1220.23	208511	243172	106282	0.857463	1.96187	887.2	161330	135044	29384.7	1.19465	5.49026	776.72	243949	137112	19126	1.7792	12.7548	1215.5	93609.1	299474	164085	0.312579	0.57049							553.3	345248	488944	92142.2	0.706109	3.7469
1222.54	207682	243209	106256	0.853923	1.95454	888.88	161060	133949	28984.9	1.2024	5.55669	778.26	242896	135984	18892.7	1.78621	12.8566	1217.92	93573.6	299138	163539	0.312811	0.572179							554.4	346758	488984	92082.4	0.70914	3.76574
1224.96	207969	243734	106278	0.853264	1.95684	890.56	160438	132579	28718.1	1.21013	5.58663	779.73	240637	135790	18737.1	1.77213	12.8428	1220.23	93832.7	298537	162875	0.314308	0.576104							555.45	345738	490484	92652.2	0.704891	3.73157
1227.38	207717	242825	106105	0.855421	1.95767	892.32	158960	132278	28510.4	1.20172	5.57551	781.27	240696	134525	18549.7	1.78923	12.9757	1222.65	93116.4	297283	162397	0.313225	0.573386							556.55	346316	490516	92205.6	0.706024	3.75591
1229.69	207884	242633	105675	0.856783	1.96721	894.08	158275	131181	27912.9	1.20654	5.67032	782.81	240337	134150	18493.3	1.79156	12.9959	1225.07	93440	296897	162116	0.314722	0.576376							557.65	345272	488676	92075.2	0.706546	3.74989
1232.11	207711	241926	105496	0.858571	1.96889	895.76	158274	130578	28024.6	1.21211	5.64767	784.35	238974	133722	18421	1.7871	12.9729	1227.49	93435.5	297705	162229	0.313853	0.575948							558.7	345406	488452	91946.2	0.707144	3.75661
1234.42	207691	242104	105302	0.85786	1.97234	897.52	157709	129672	27689.5	1.21621	5.69562	785.89	238326	132602	18004.3	1.7973	13.2372	1229.8	92933.6	296912	162463	0.313001	0.572031							559.8	345456	486382	91611.6	0.710257	3.77088
1236.84	207499	241335	104906	0.859795	1.97795	899.2	156359	129282	27405.5	1.20943	5.70538	787.43	236369	131963	18031.7	1.79118	13.1085	1232.22	93320	296703	161671	0.314524	0.577222							560.85	343576	486678	91937.2	0.705962	3.73707
1239.26	207188	241346	105144	0.858468	1.97053	900.96	155714	128471	27437.6	1.21205	5.67519	788.9	234920	131287	17717.7	1.78936	13.259	1234.53	92665.5	296128	160997	0.312923	0.575572							561.95	343628	485200	91340	0.708219	3.76208
1241.57	207325	241448	104597	0.858671	1.98212	902.72	154525	127655	27049.1	1.21049	5.71275	790.44	234174	130906	17521	1.78887	13.3653	1236.95	92152.7	295655	161456	0.31169	0.570759							563.05	341640	482712	90968.6	0.707751	3.75558
1243.99	207009	241947	105197	0.855596	1.96782	904.4	154376	127119	27019.9	1.21443	5.71343	791.98	233580	130106	17493.7	1.79531	13.3522	1239.26	92103.6	294621	160866	0.312617	0.572548							564.1	341254	482198	90714.4	0.707705	3.76185
1246.3	207360	239937	104842	0.864226	1.97784	906.16	153445	125834	26945.5	1.21943	5.69464	793.45	231747	128392	17562.7	1.805	13.1954	1241.68	92085.5	294553	160279	0.312628	0.574532							565.2	341214	481522	90251.4	0.708616	3.78071
1248.72	207144	241047	104383	0.859349	1.98446	907.92	153490	125422	26541.4	1.22378	5.78305	794.99	229817	127658	17365	1.80026	13.2345	1244.1	91842.7	293598	159549	0.312818	0.575639							566.25	339638	480072	90212	0.707473	3.76489
1251.03	206609	240038	104433	0.860734	1.97839	909.6	152982	125179	26346.5	1.22211	5.80656	796.46	229136	127714	17158.9	1.79413	13.3538	1246.3	91934.5	292339	159059	0.314479	0.57799							567.35	338734	480680	89800.8	0.704698	3.77206
1253.45	206695	239985	104267	0.861279	1.98235	911.36	152012	123897	26434.6	1.22693	5.75051	798	228743	126282	17290.6	1.81136	13.2293	1248.72	91884.5	291615	158414	0.315088	0.580029							568.4	338696	479656	89407.8	0.706123	3.78822
1255.98	206790	240255	104031	0.860709	1.98777	913.04	150651	123051	26184.6	1.2243	5.75342	799.54	227156	126234	16836.3	1.79948	13.492	1251.14	91793.6	292106	158319	0.314247	0.579801							569.45	338388	477448	89353.8	0.708743	3.78706
1258.29	206460	239521	103615	0.861971	1.99256	914.88	150405	122696	25997.8	1.22584	5.78531	801.01	225766	125135	16757.7	1.80418	13.4723	1253.45	91521.8	290714	158025	0.314818	0.579162							570.55	337772	478010	89476.8	0.706621	3.77497
1260.71	206393	238993	103732	0.863594	1.98968	916.56	149761	121364	25670.4	1.23399	5.83401	802.55	225341	124392	16542.1	1.81154	13.6223	1255.87	91300.9	290060	157540	0.314766	0.579541							571.65	337252	475268	88609.4	0.709604	3.80605
[truncated: 972 more rows]

## Sheet: Figure 8
U900 Energy Scans with 10eV energy slit
	Graphite									Silicon
	O-			O2-			O3-			O-			O2-			O3-
Initial Kinetic Energy (eV)	U	UO	UO2	U	UO	UO2	U	UO	UO2	U	UO	UO2	U	UO	UO2	U	UO	UO2
[truncated: 151 more rows]

## Sheet: Figure 9
IRMM2329P U,UO,UO2 depth profiles
[truncated: 753 more rows]

## Sheet: Figure 10
Inkjet printed particle profiles U,UO,UO2
[truncated: 1,503 more rows]

[truncated: 1 more sheets: Appendix - Figure 1]
